# Supplementary material
Source: PubMed Central journal article supplement (PMC3033481)

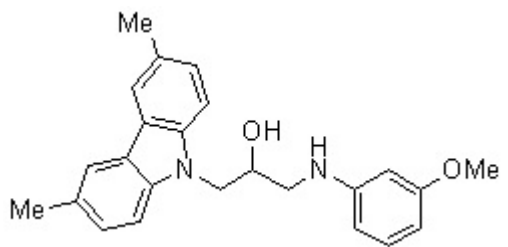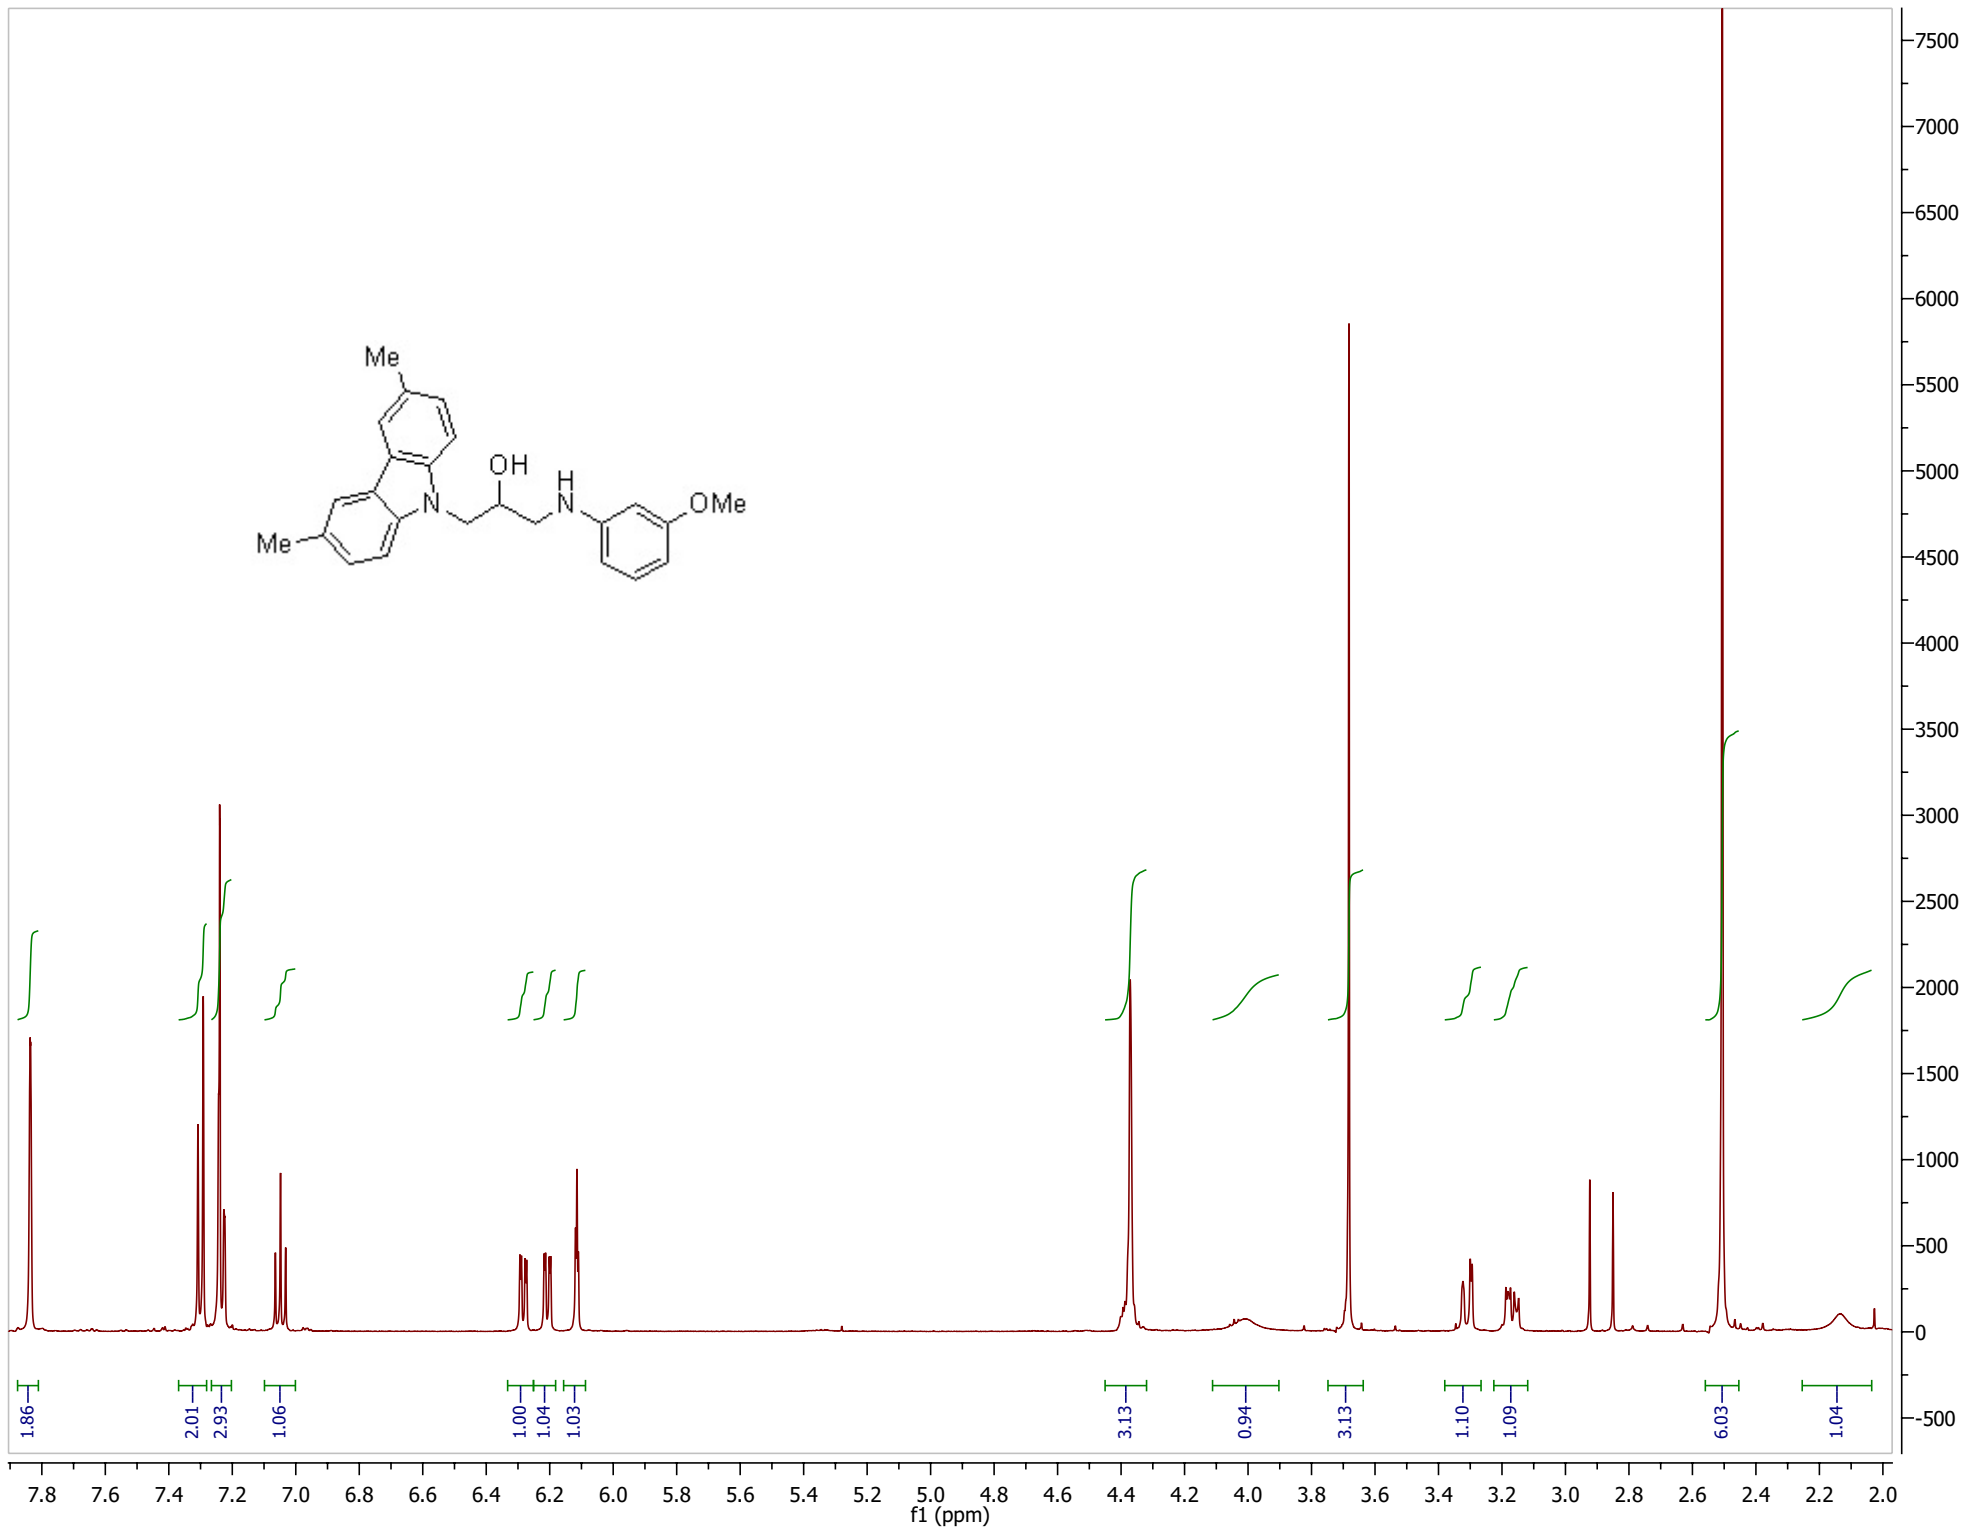

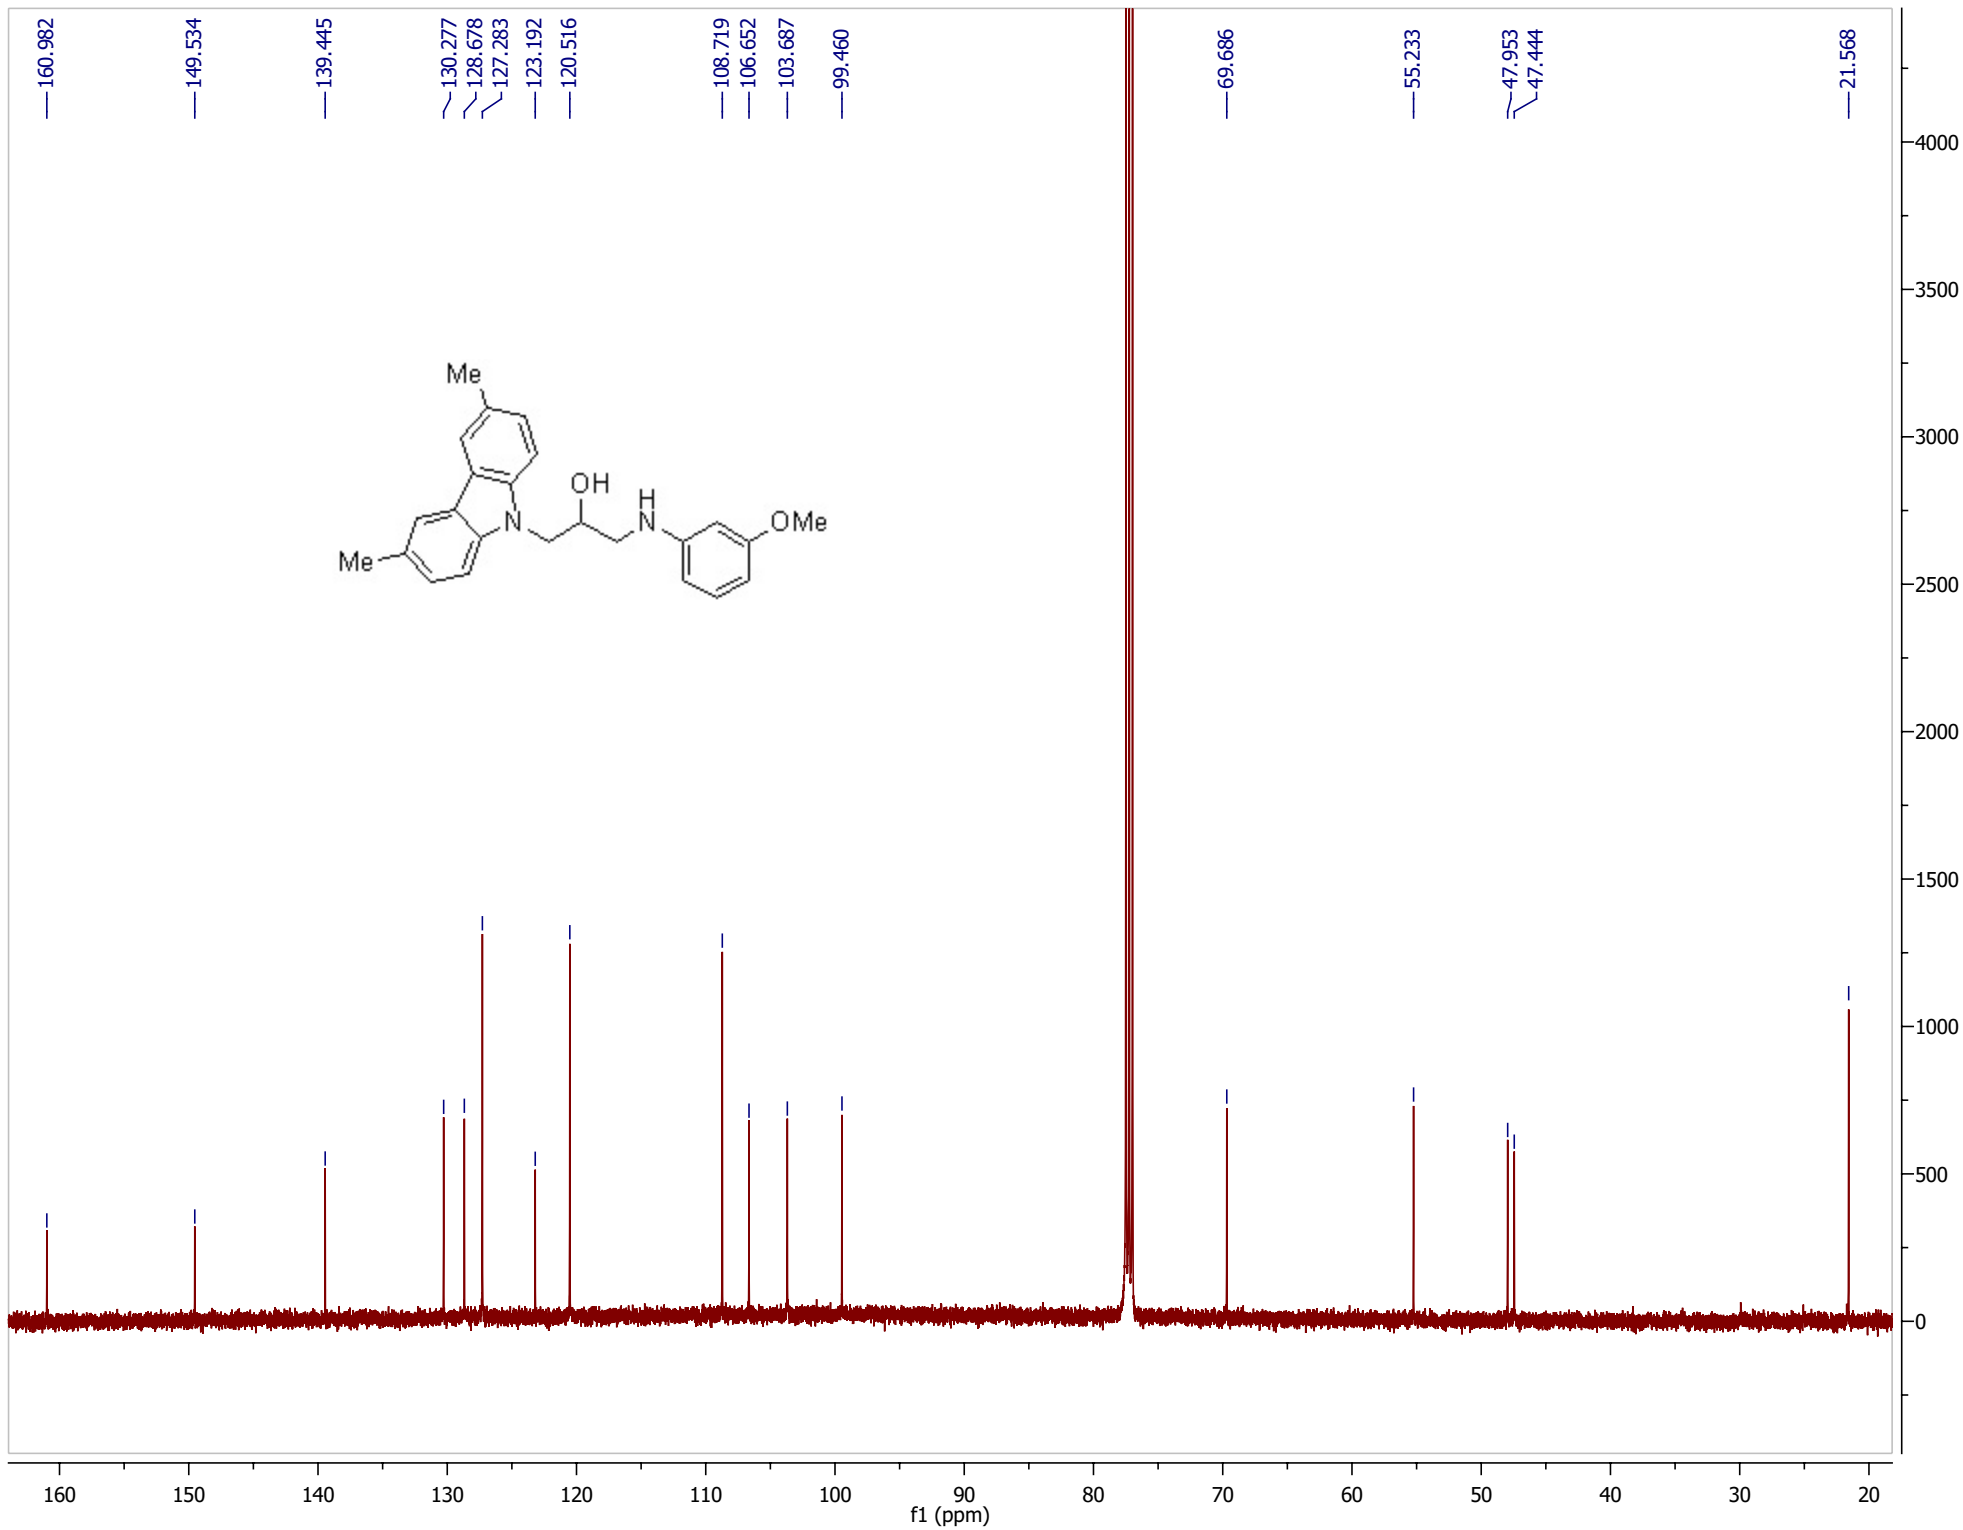

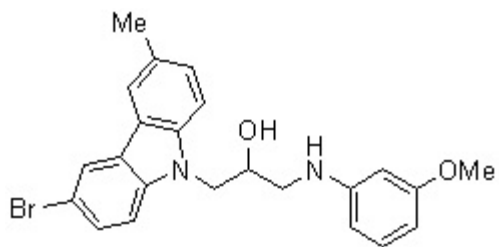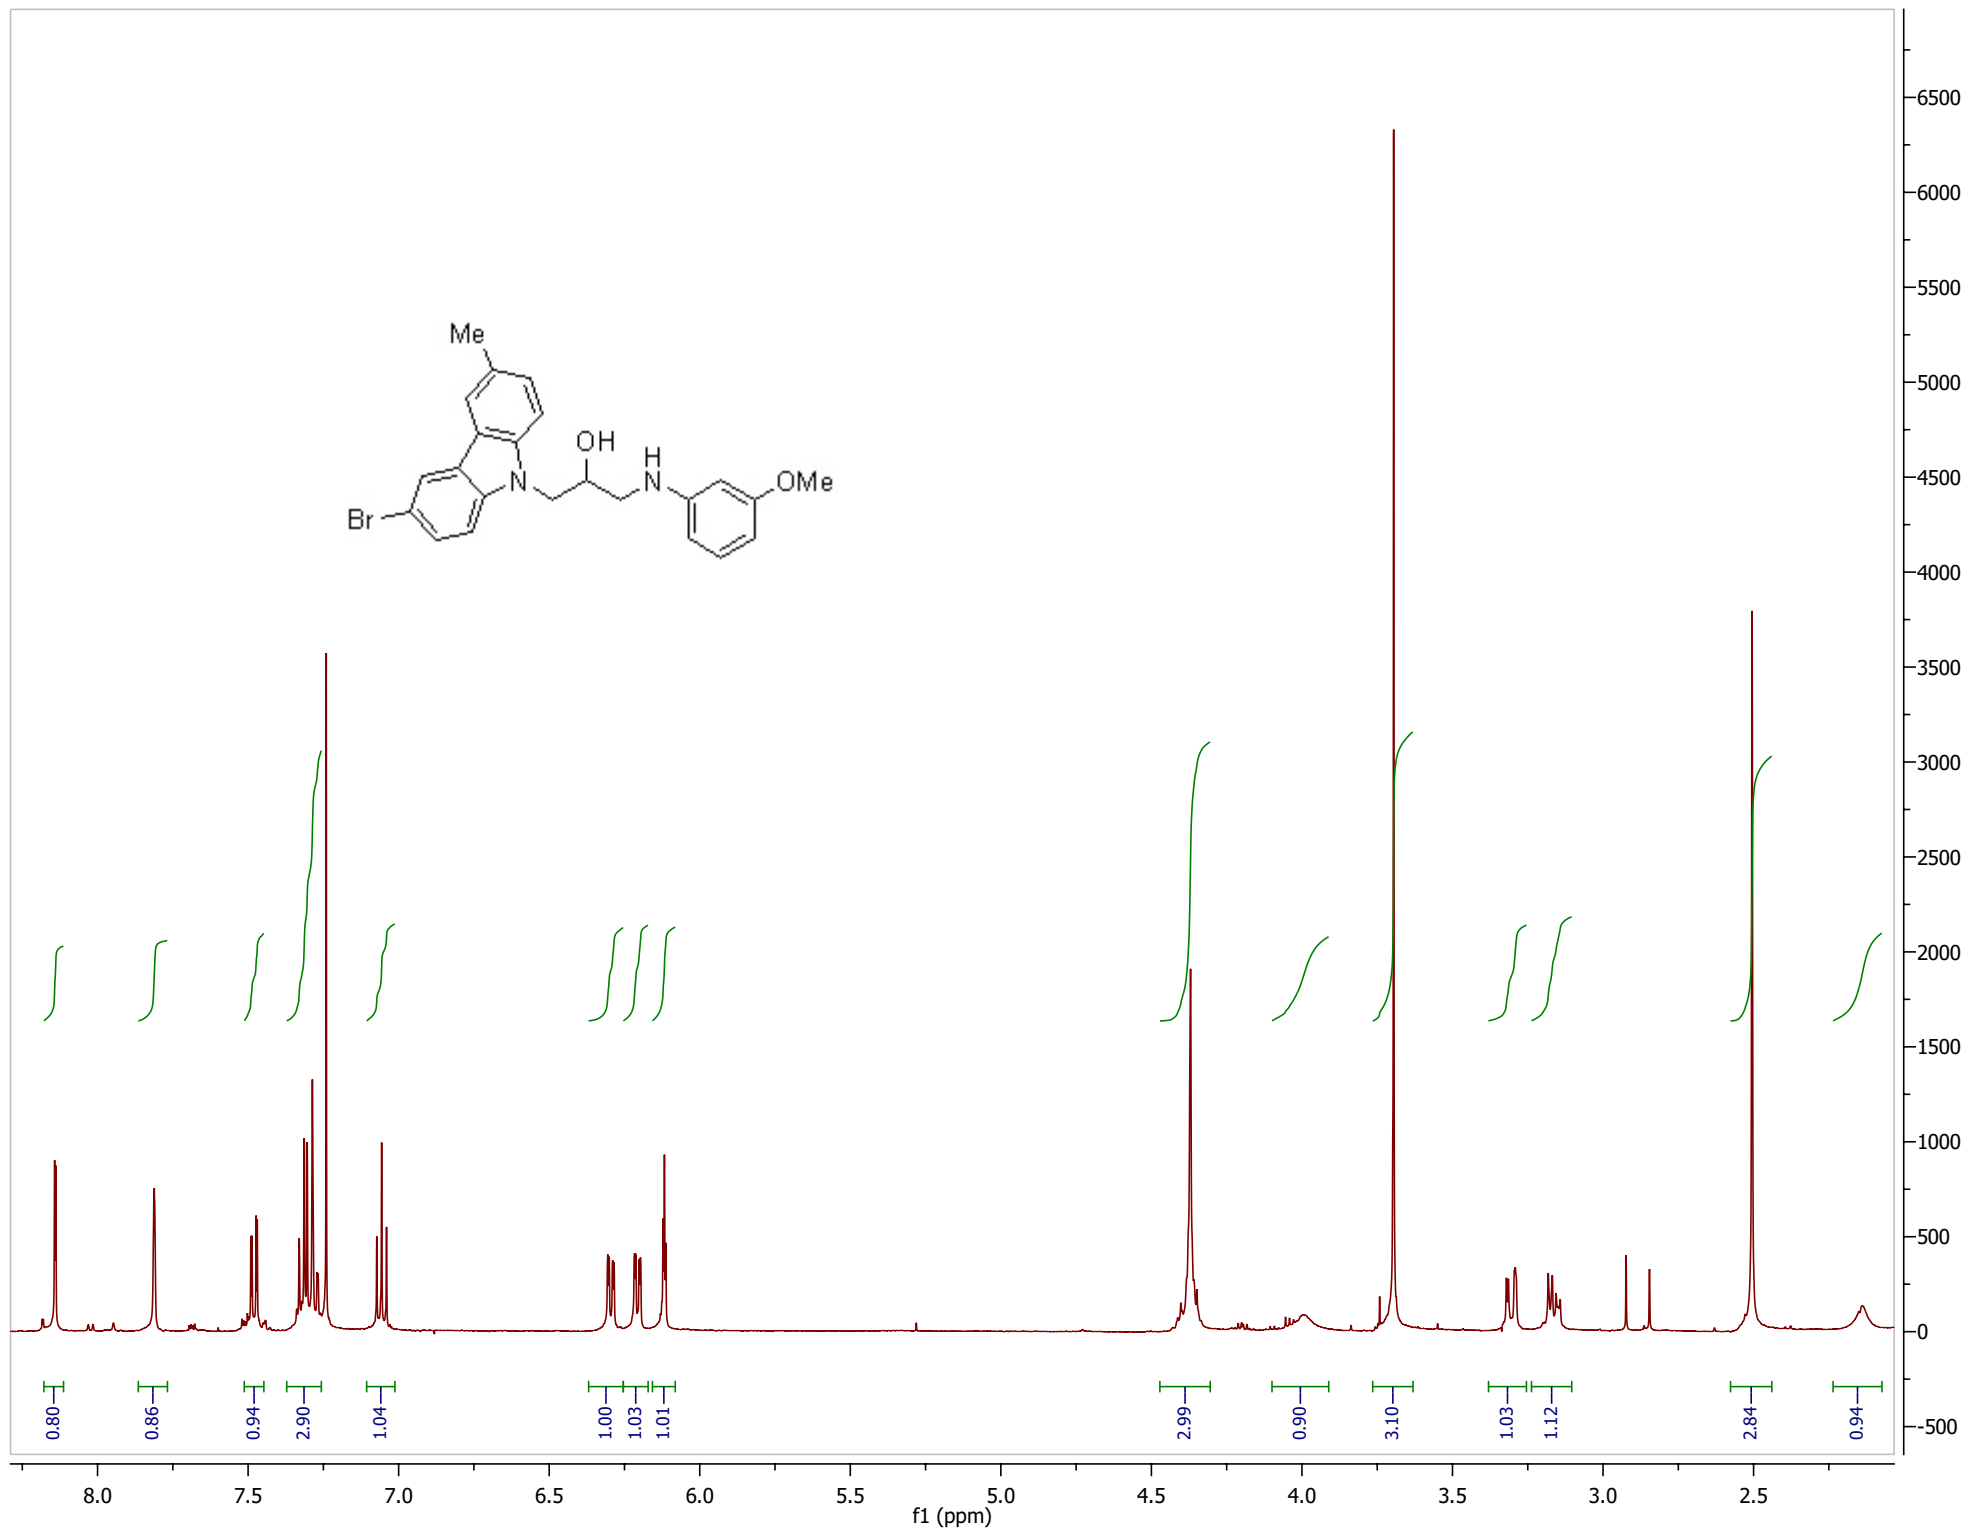

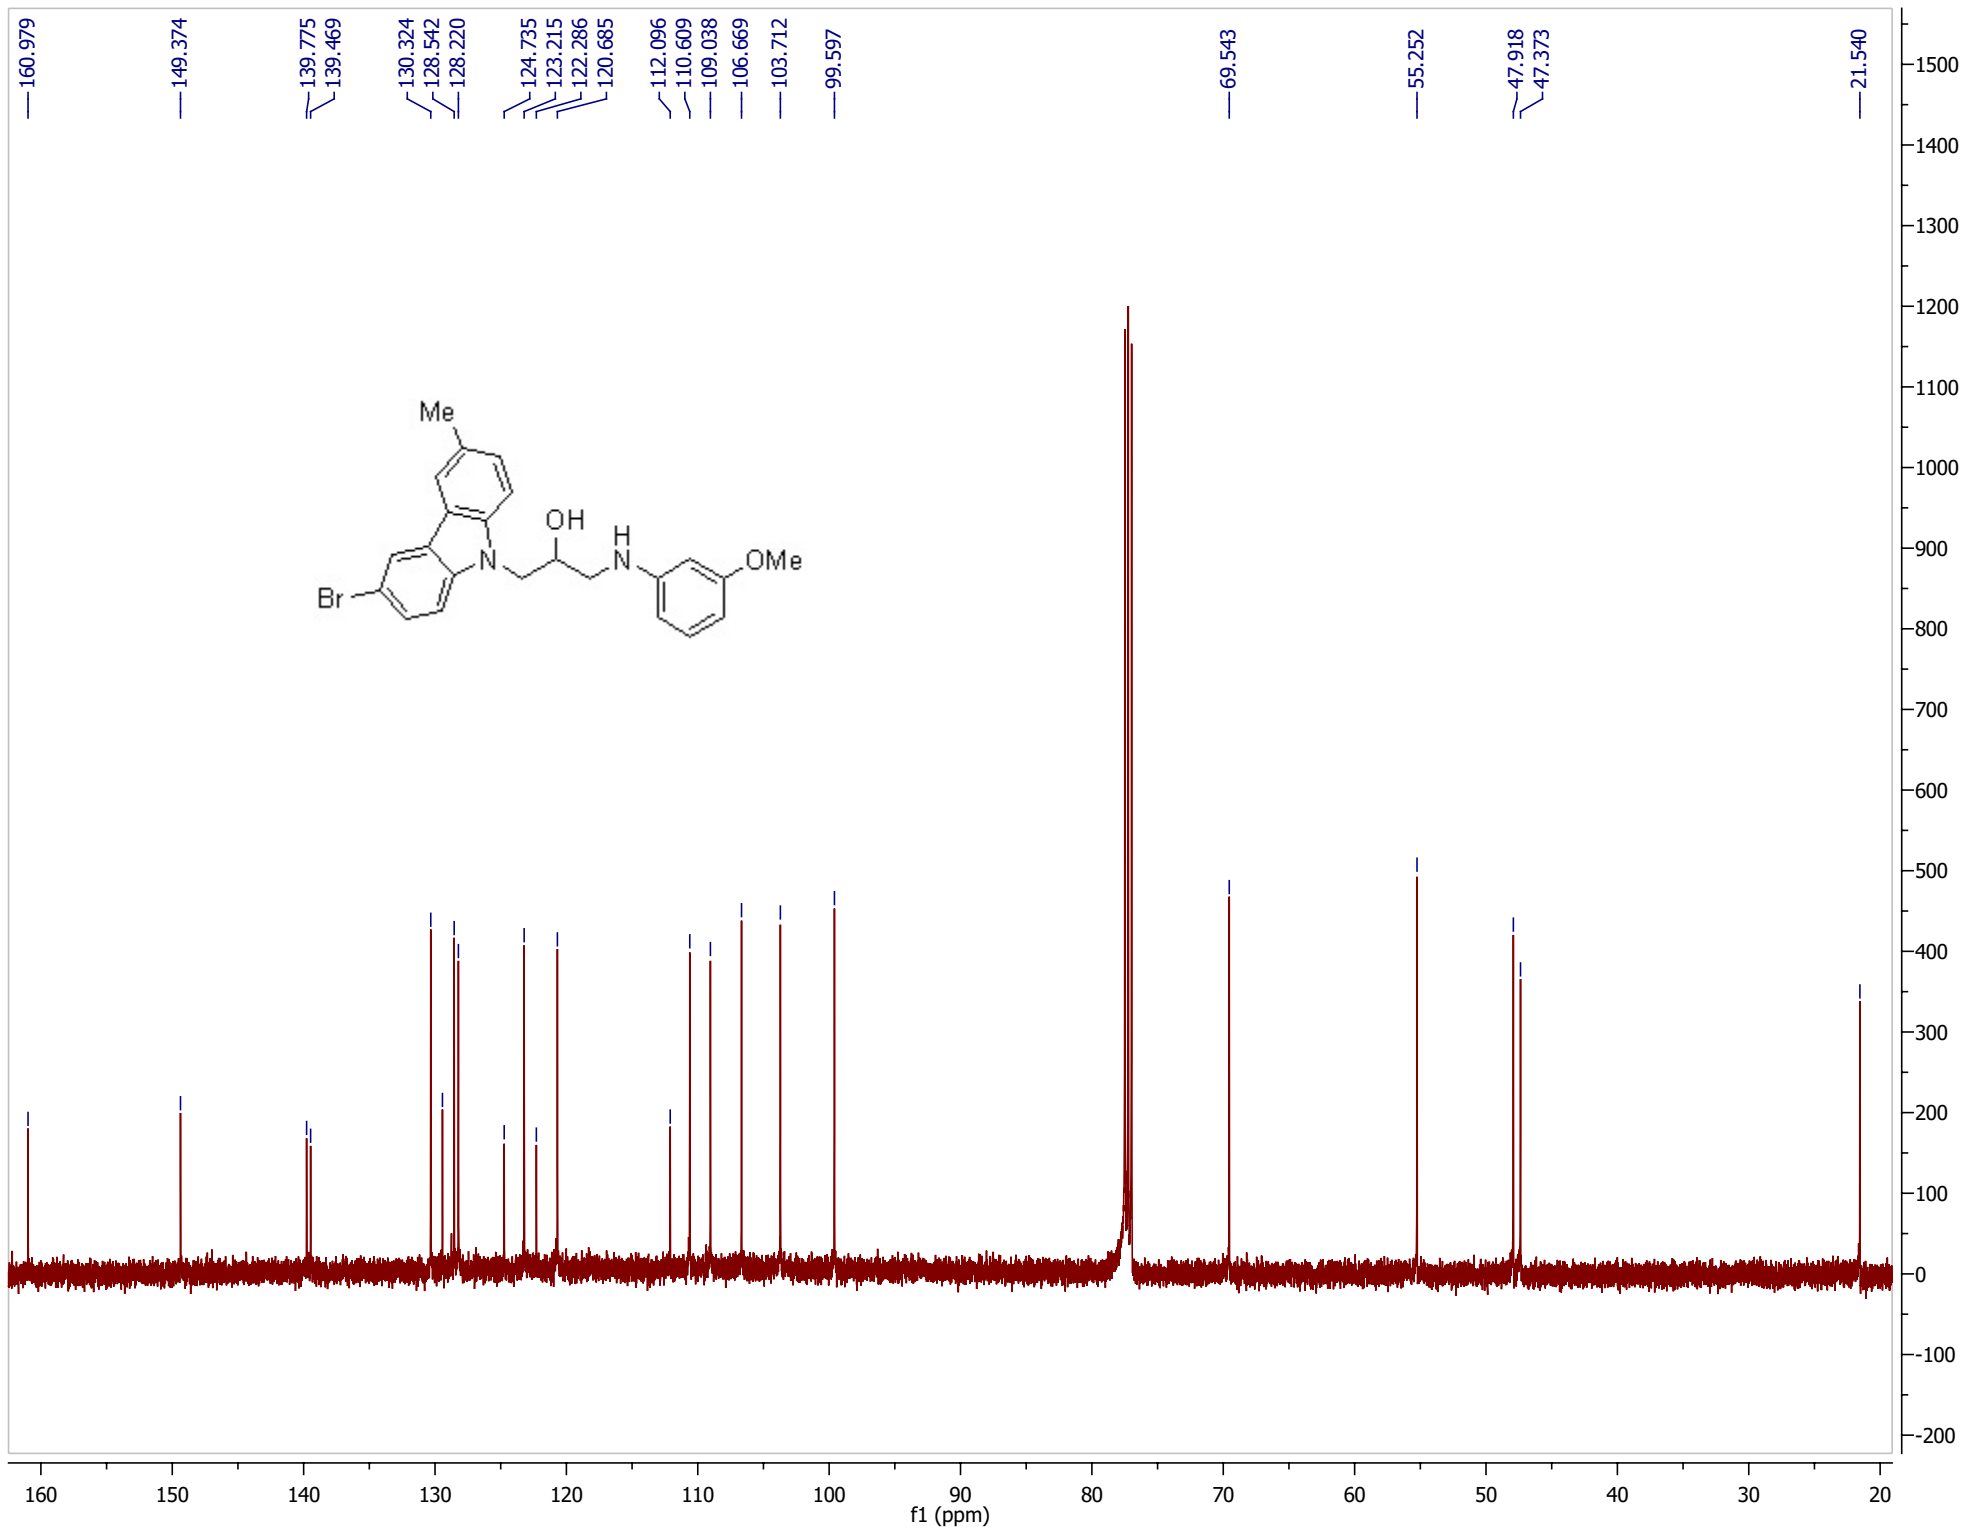

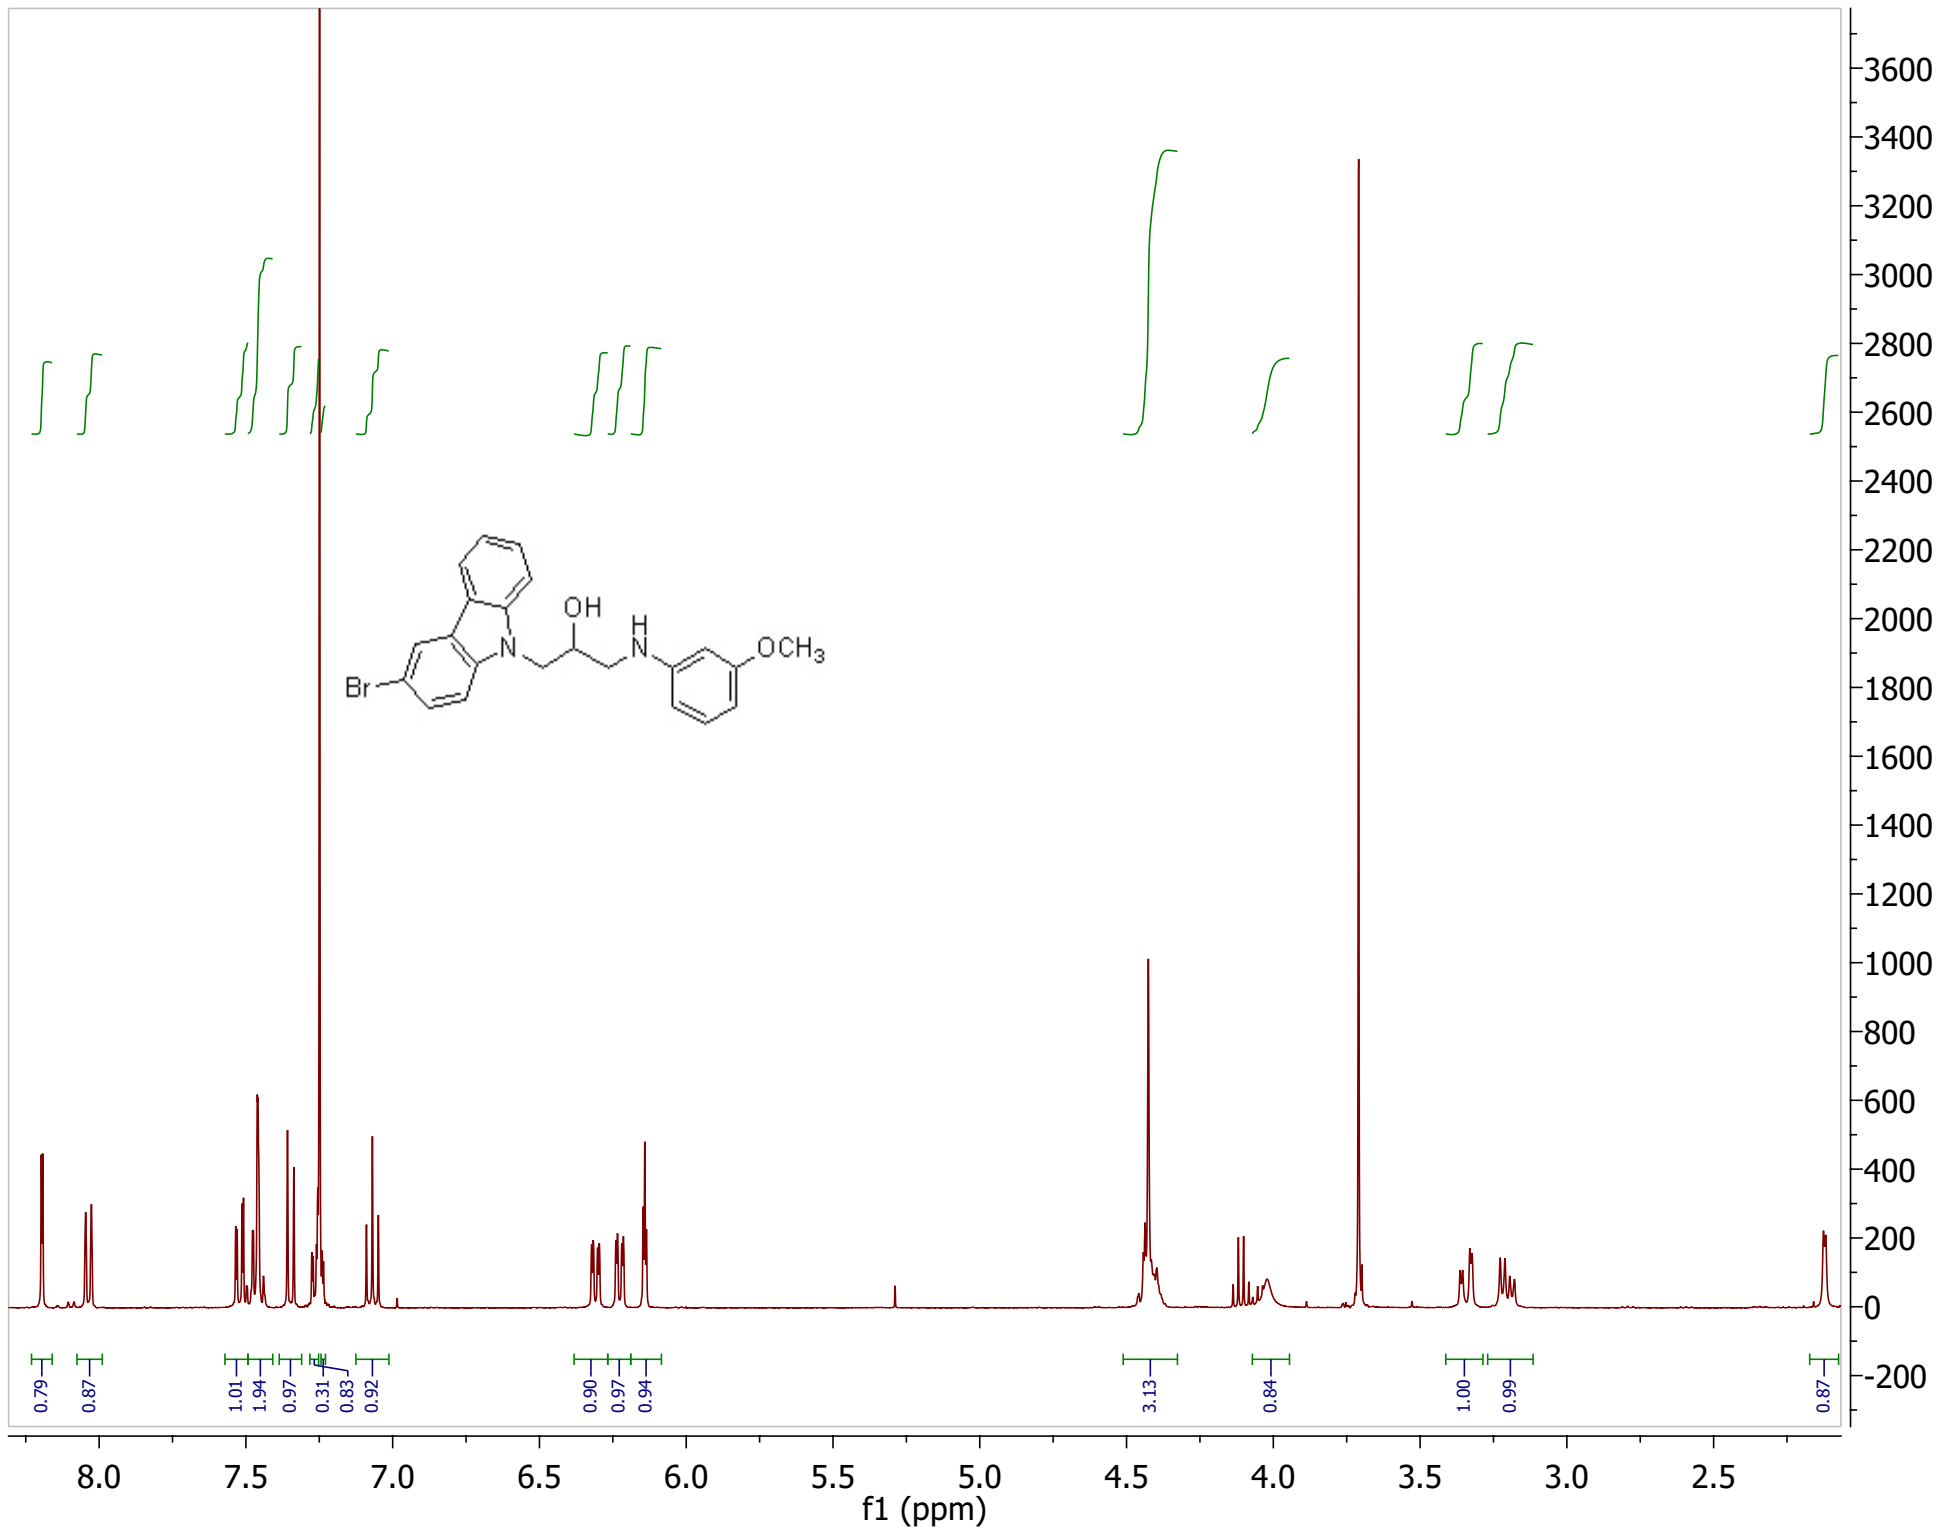

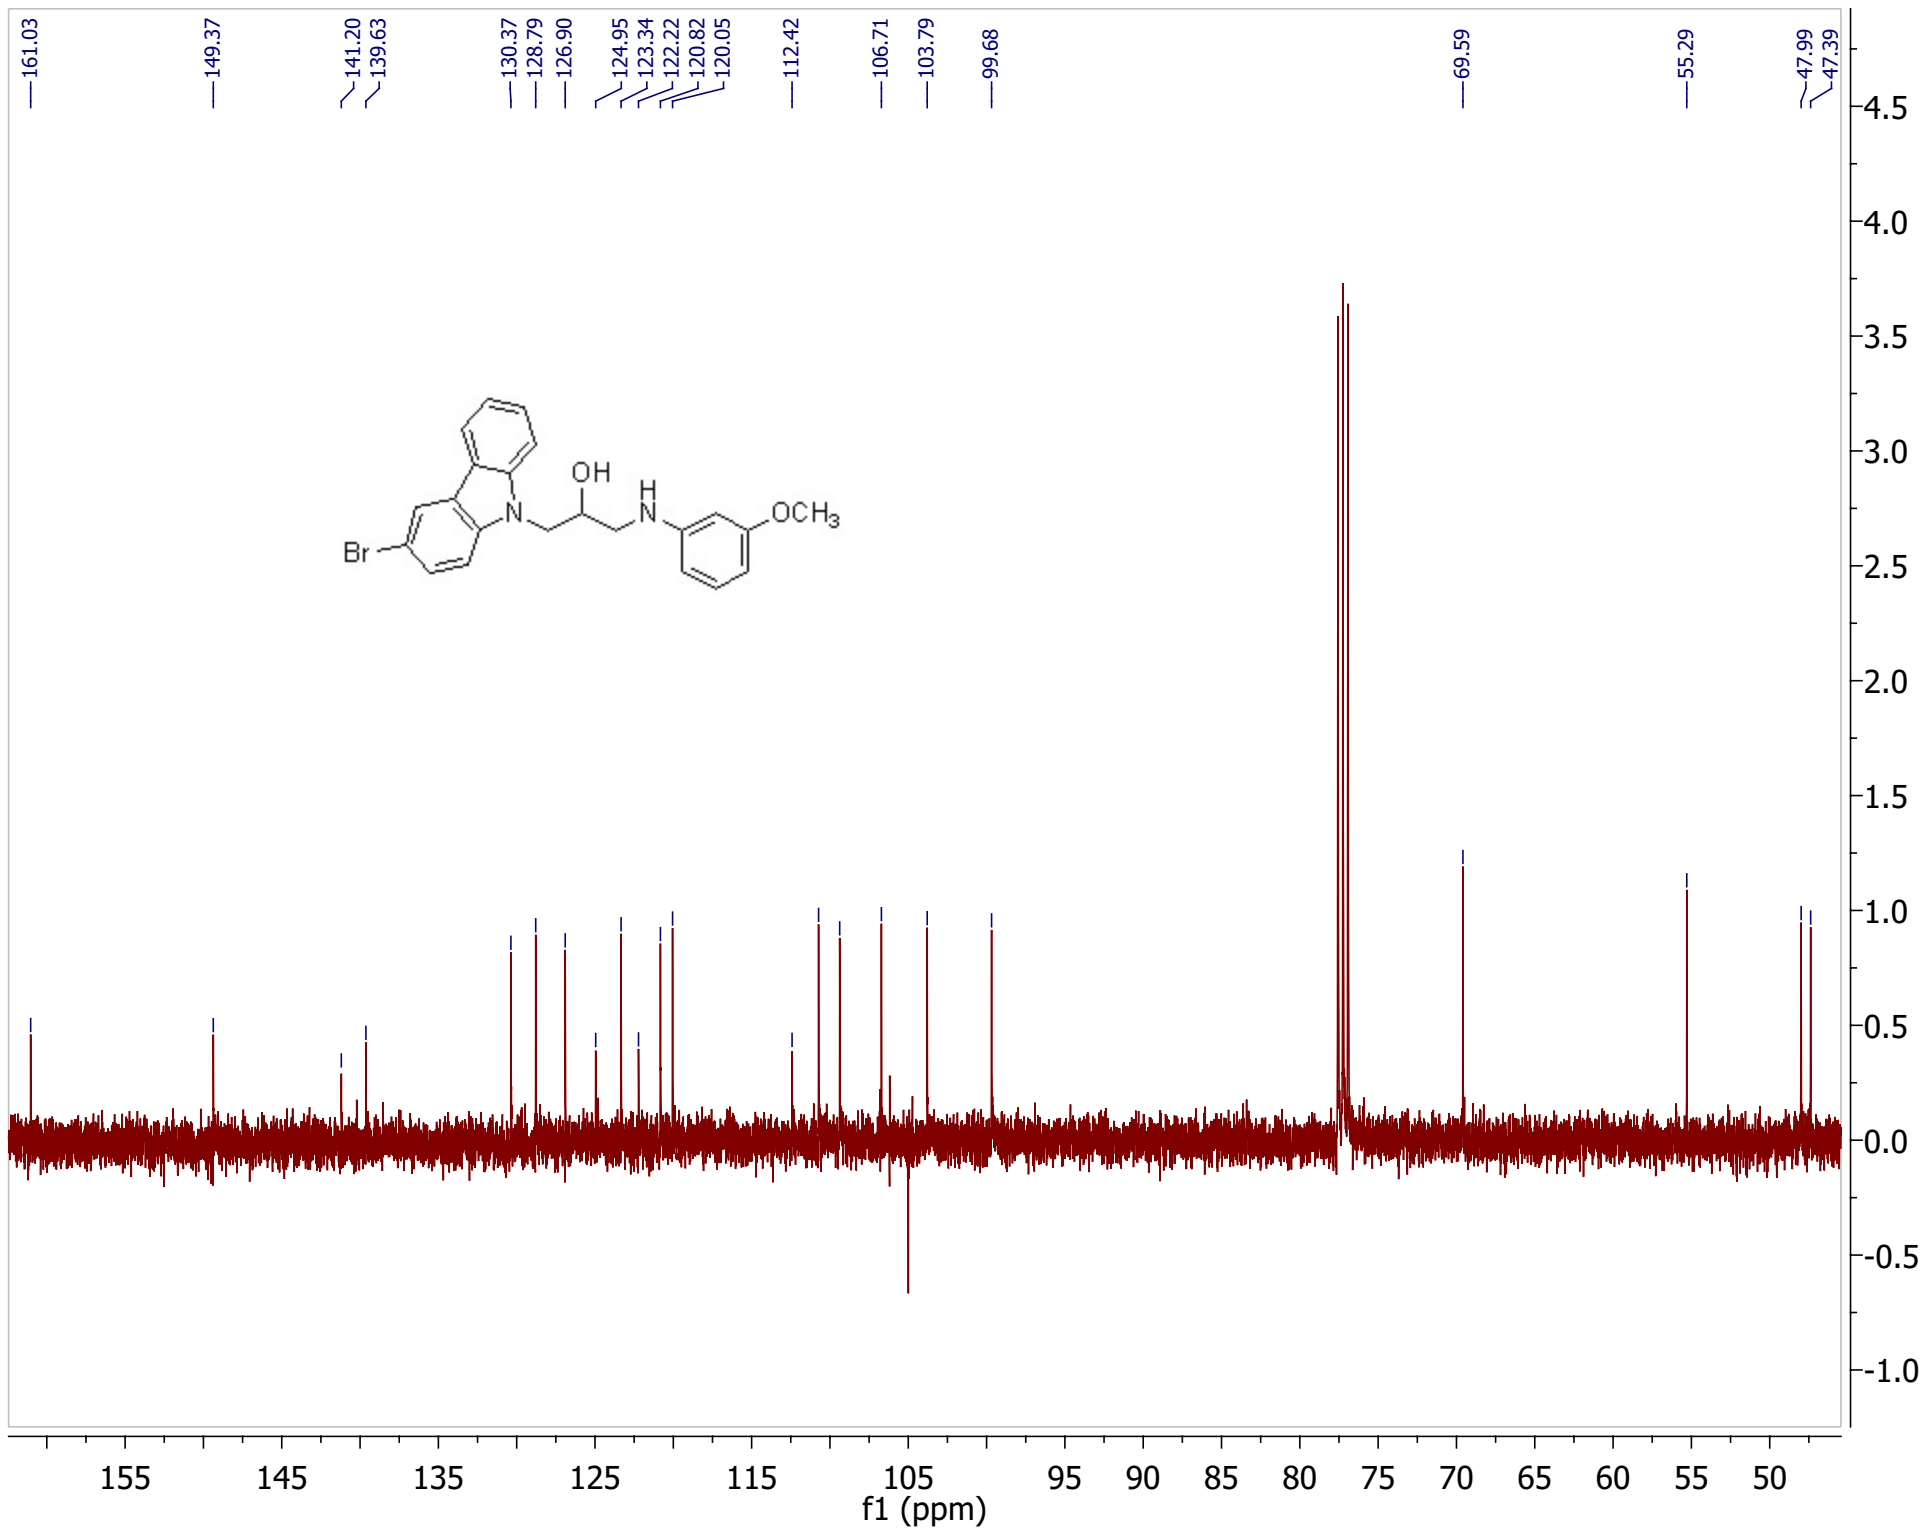

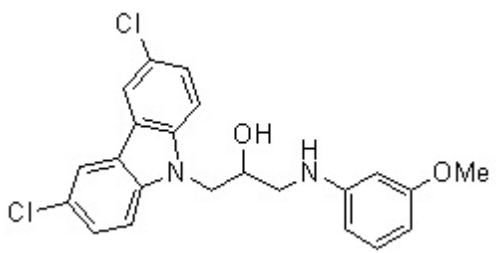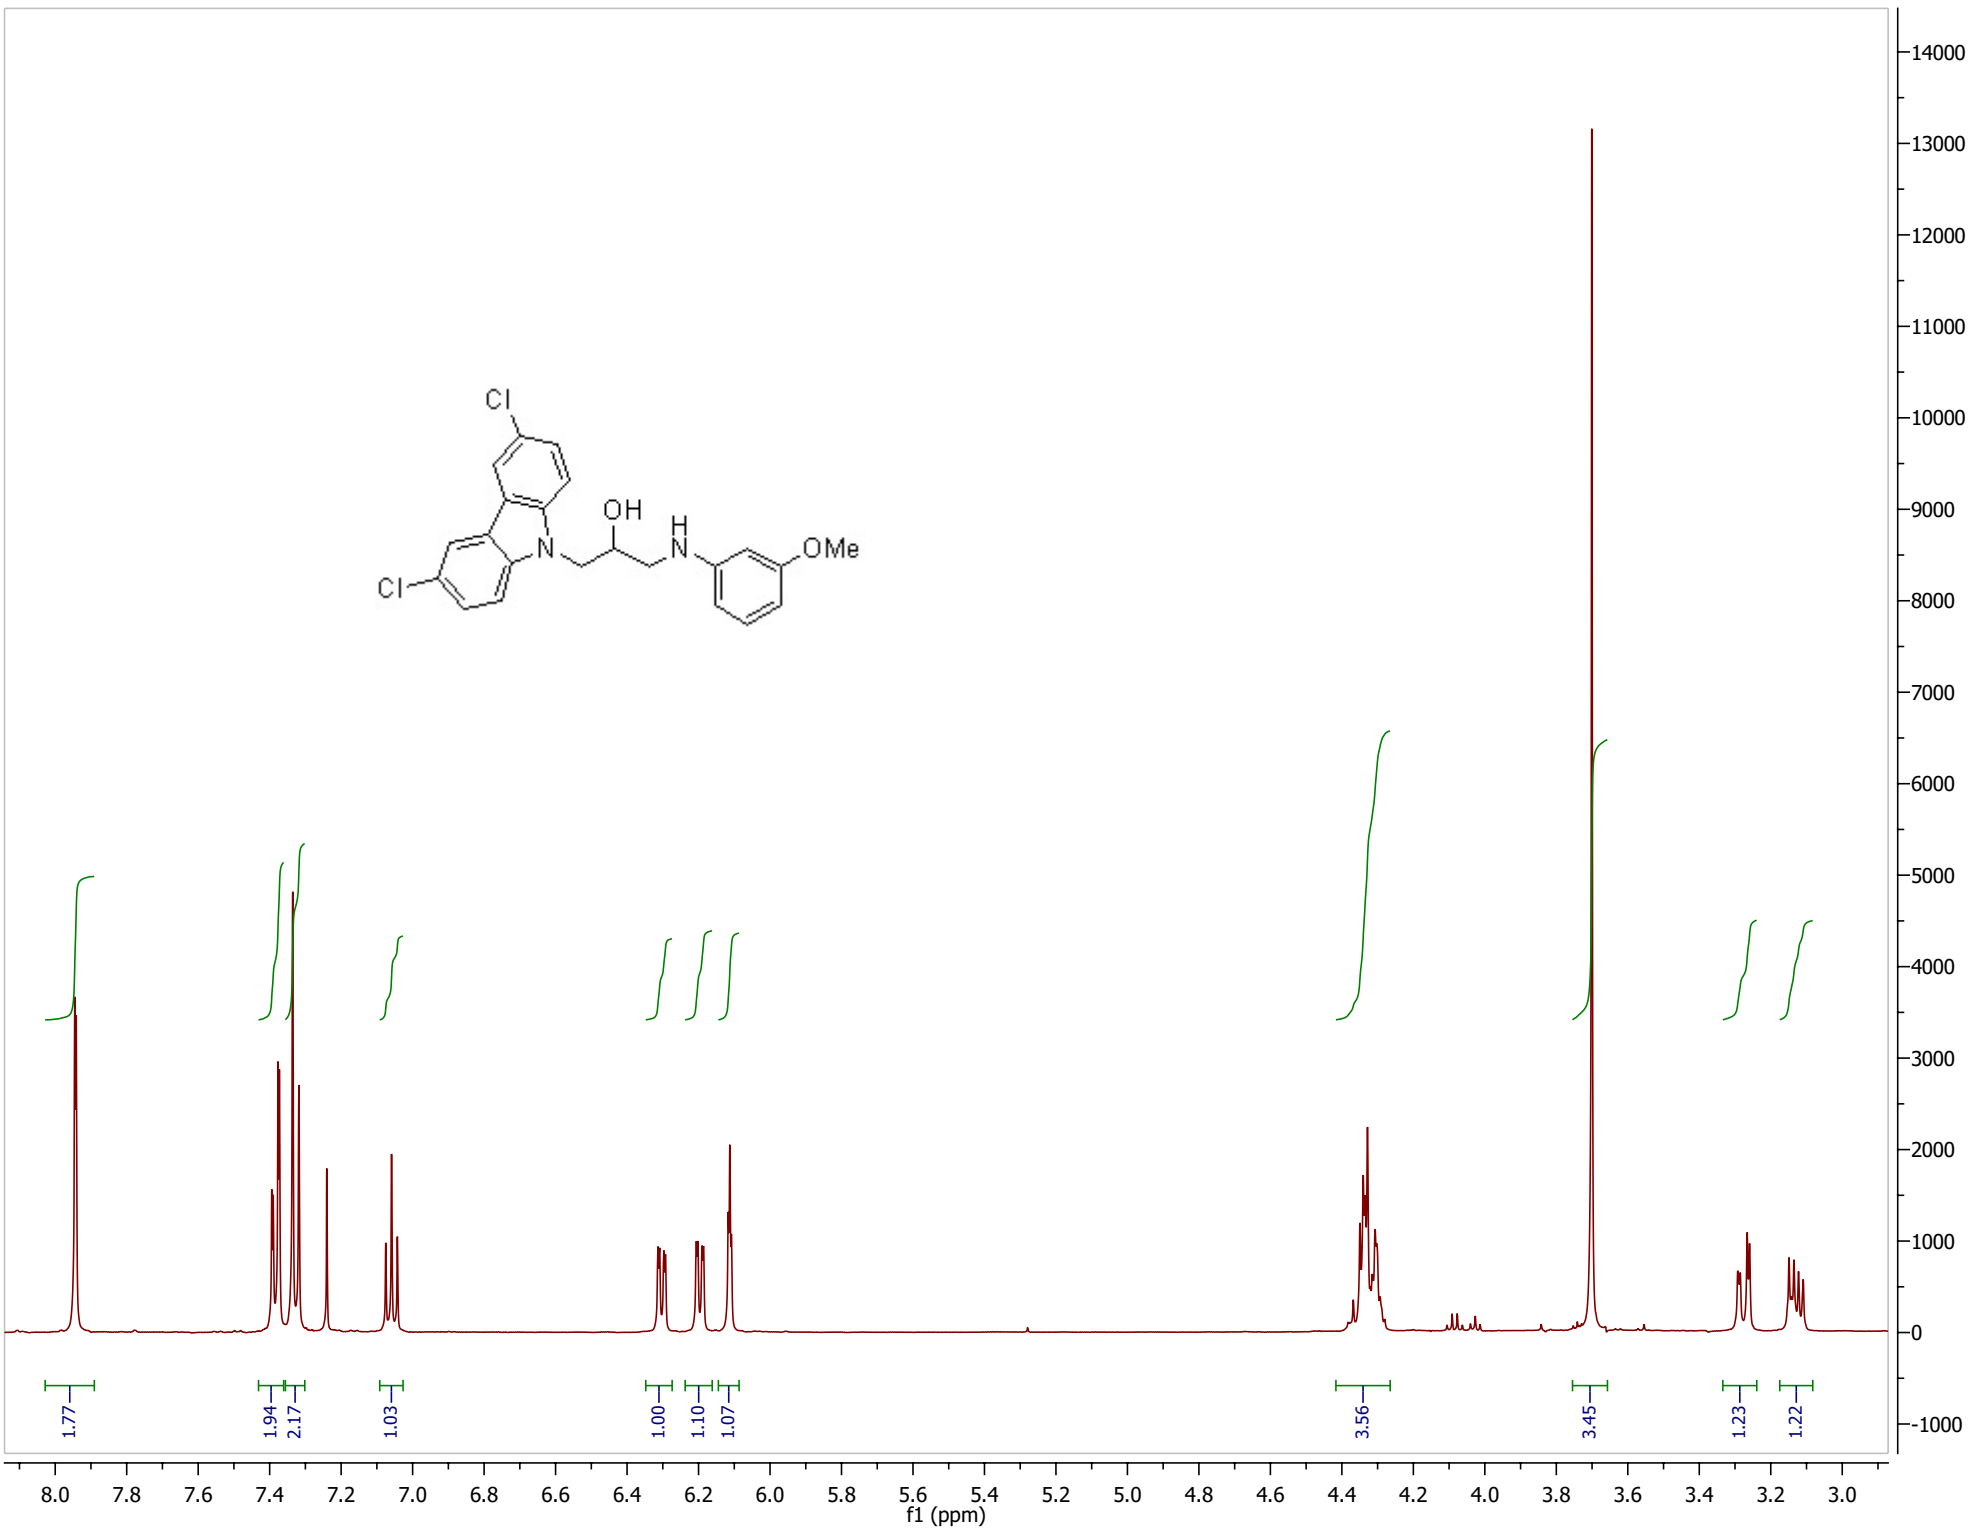

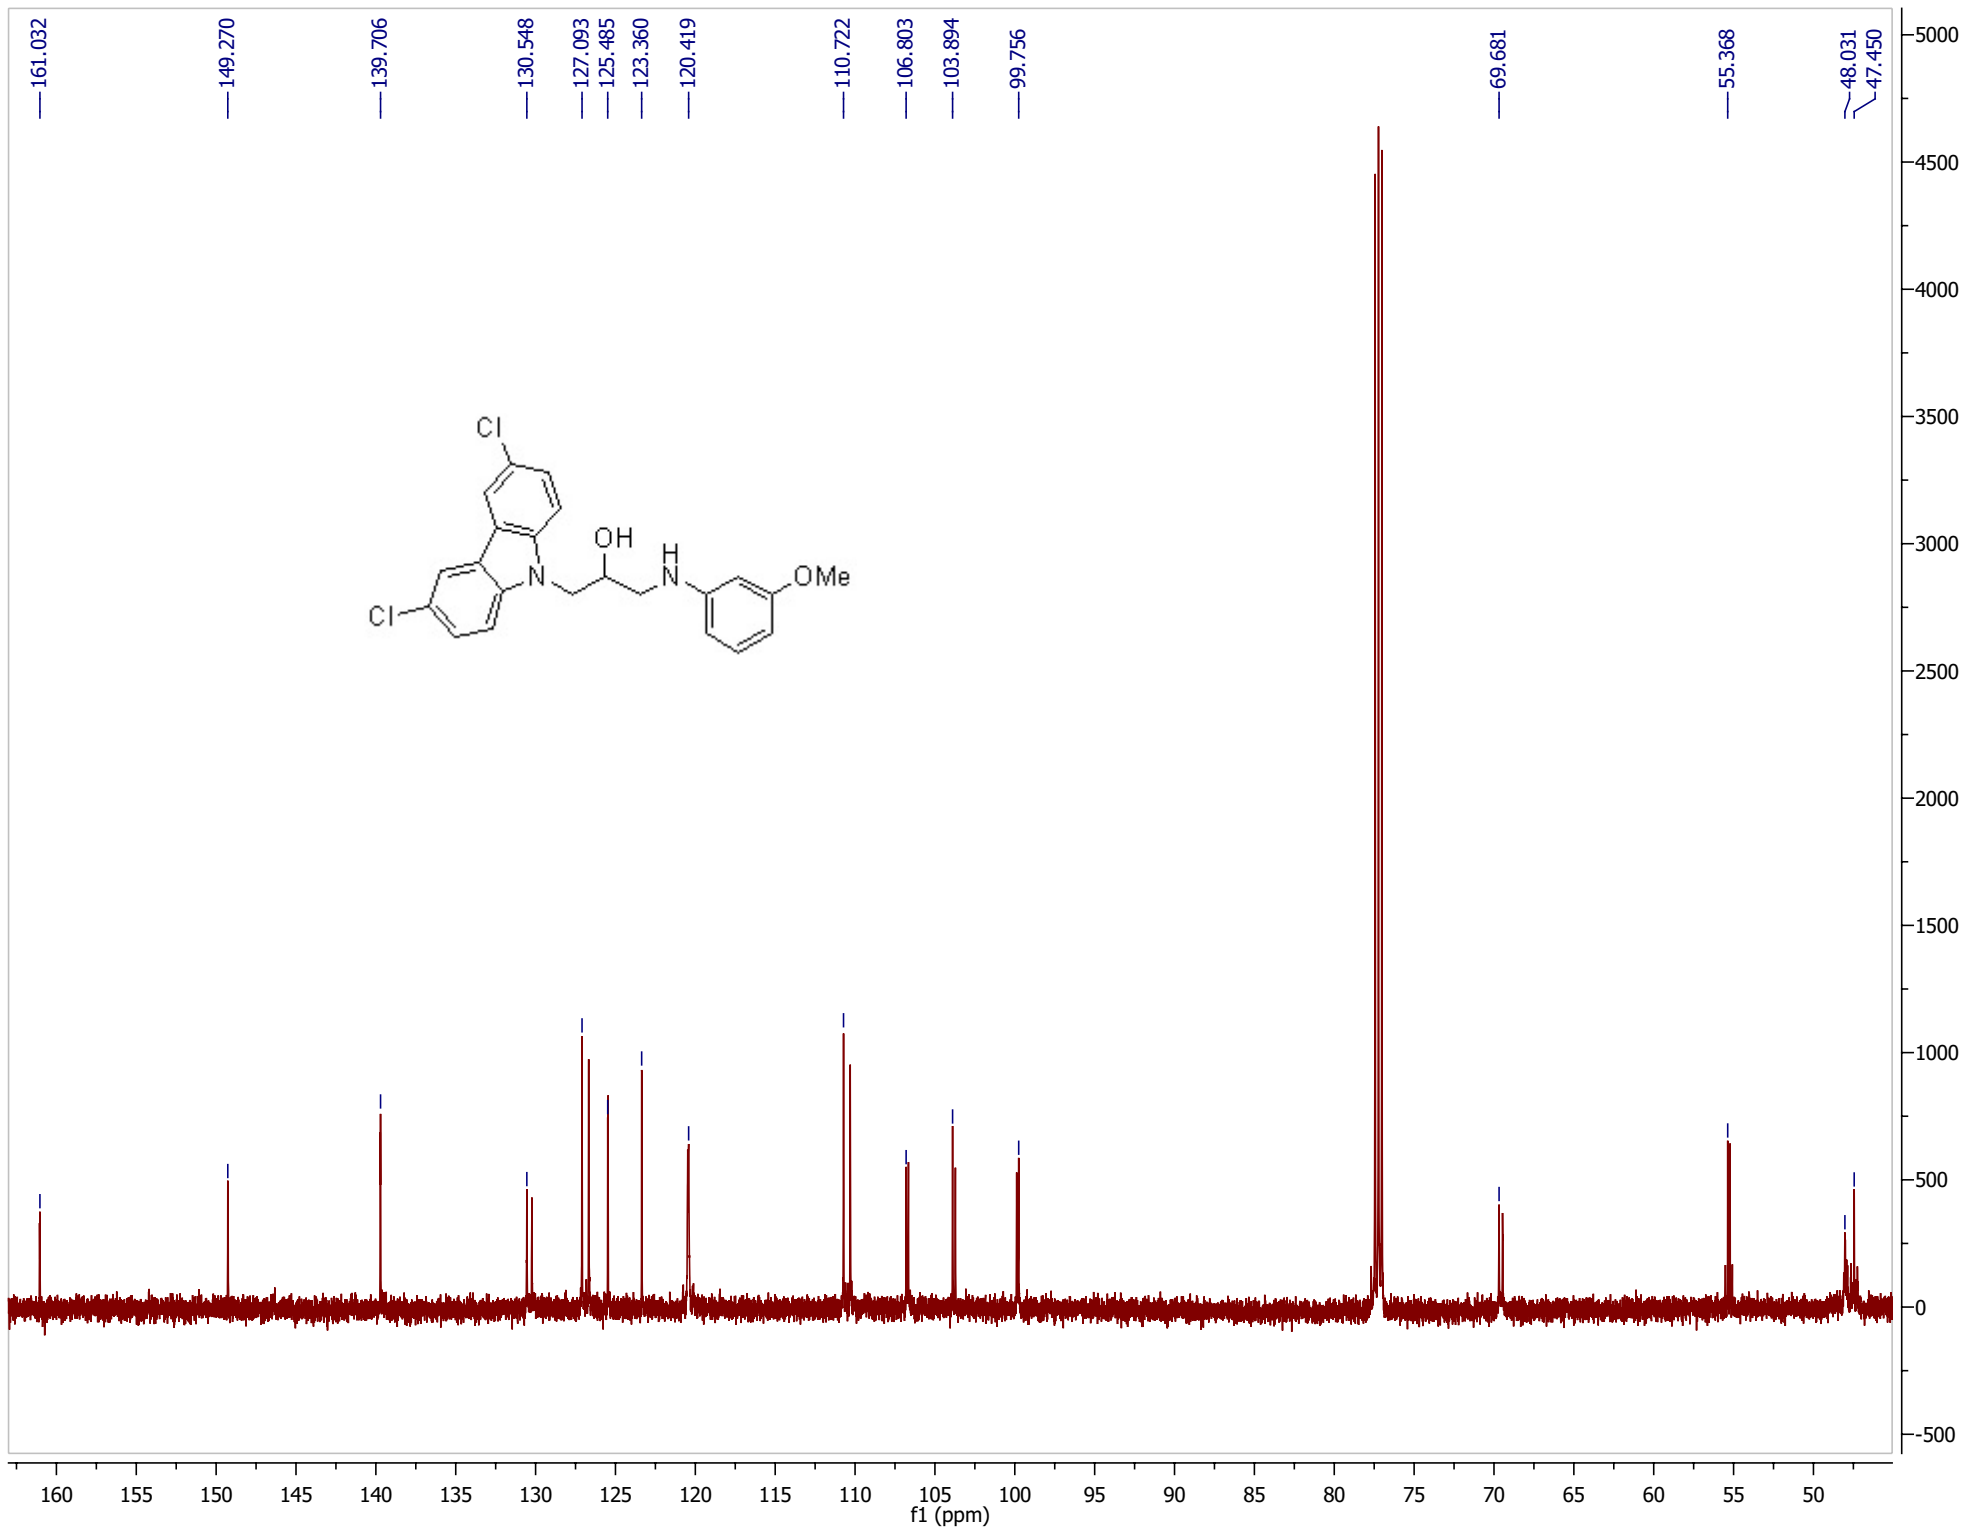



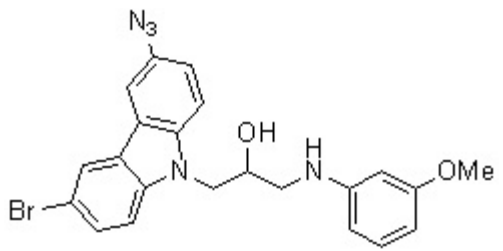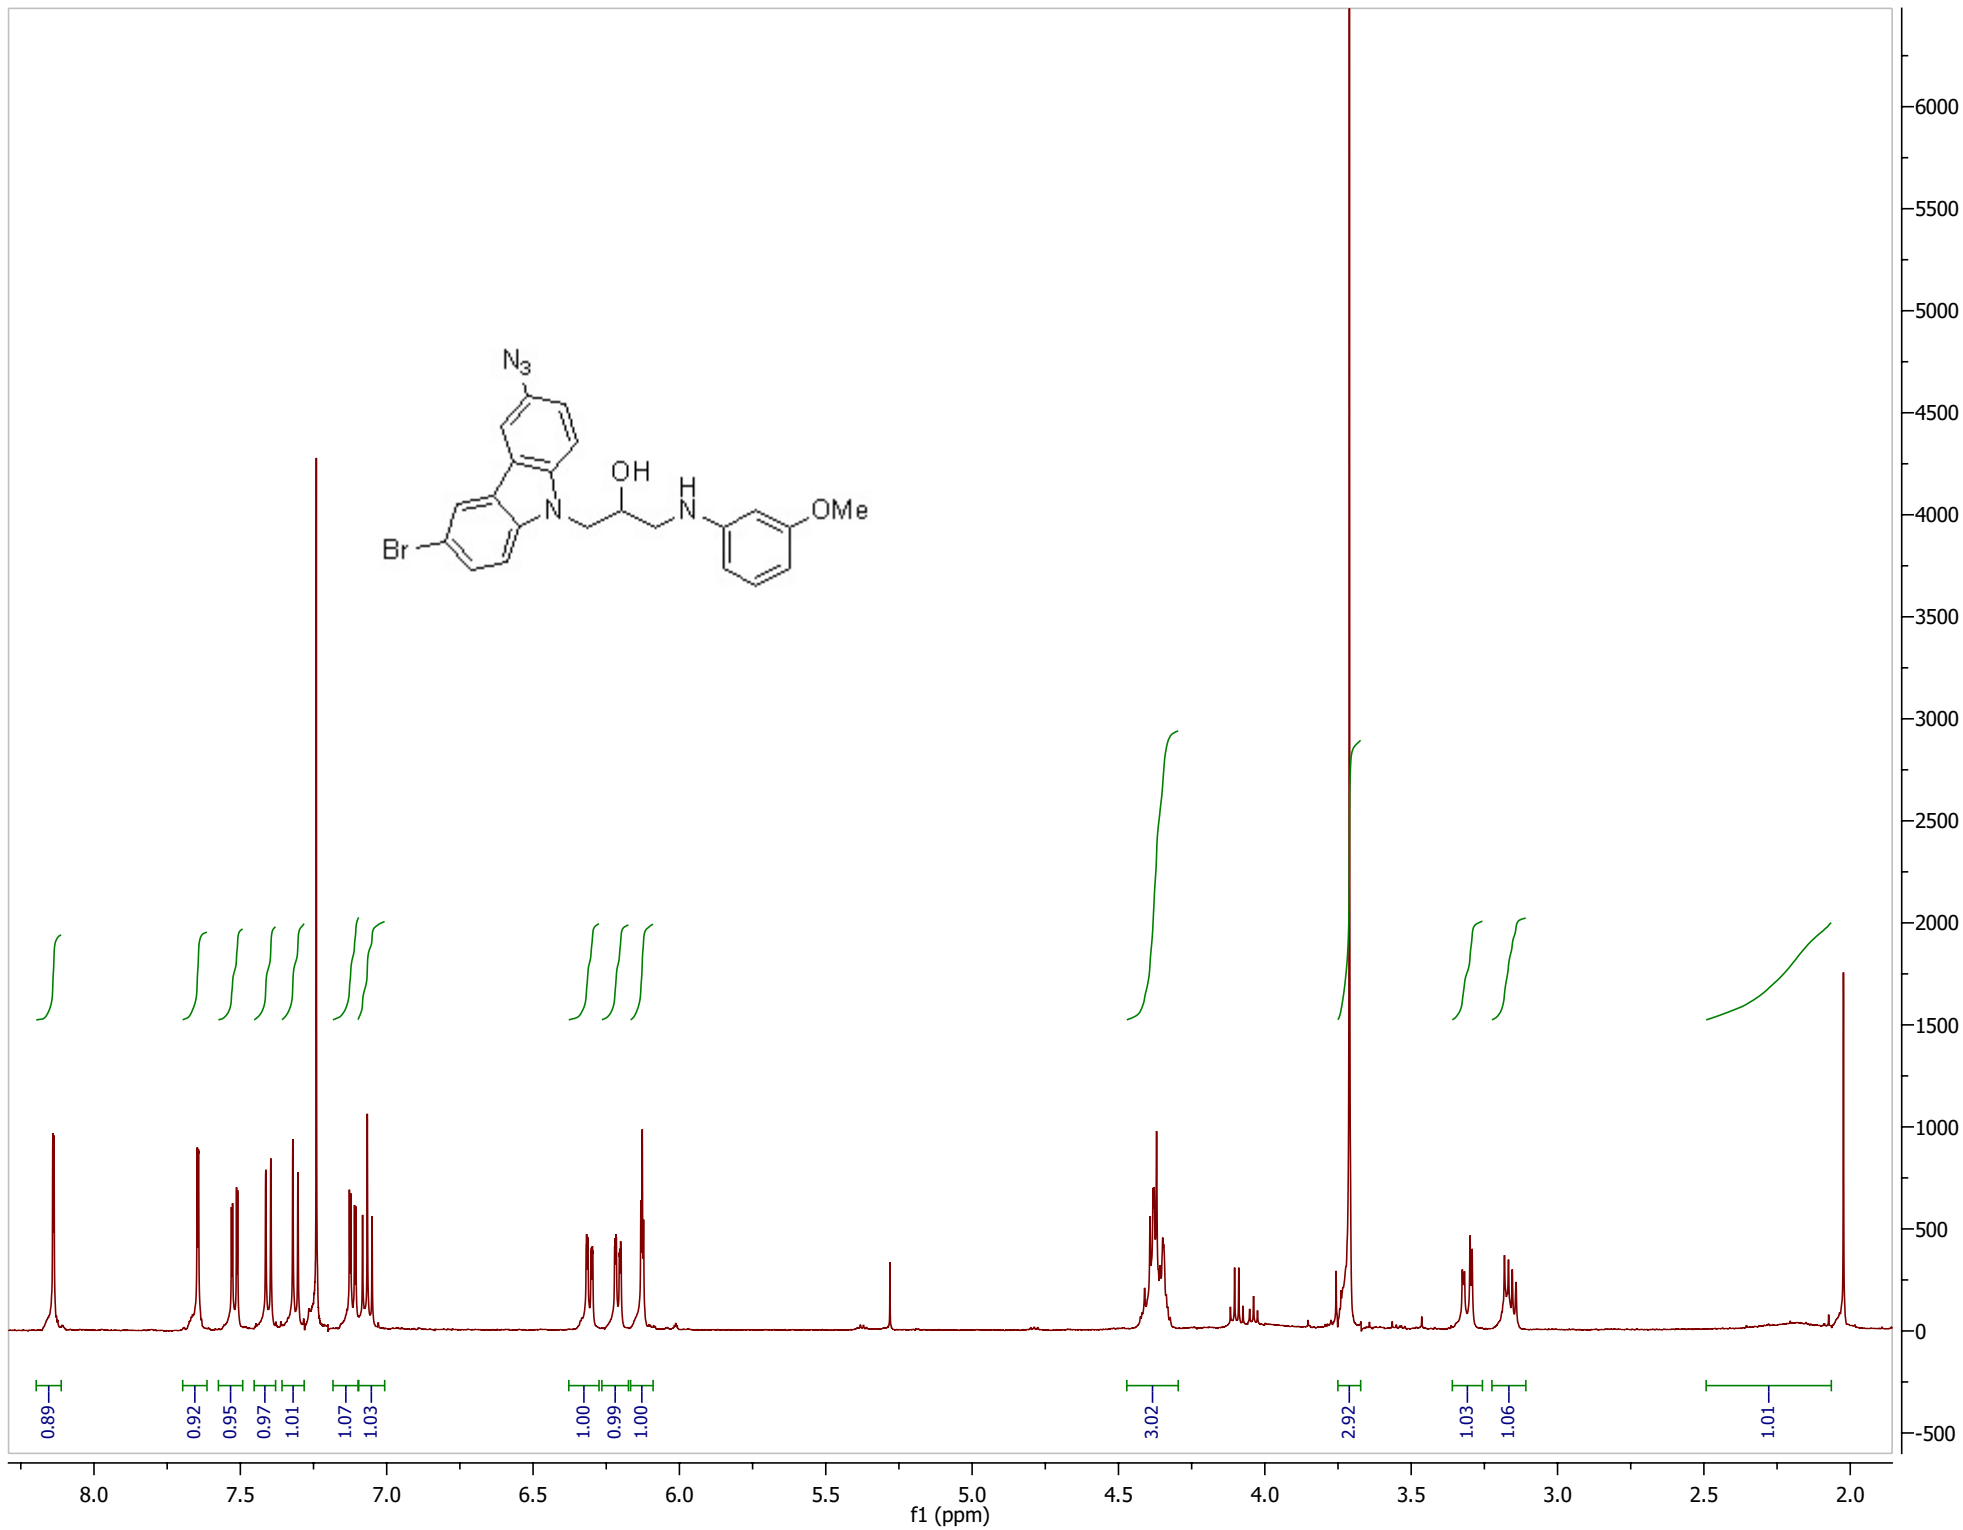

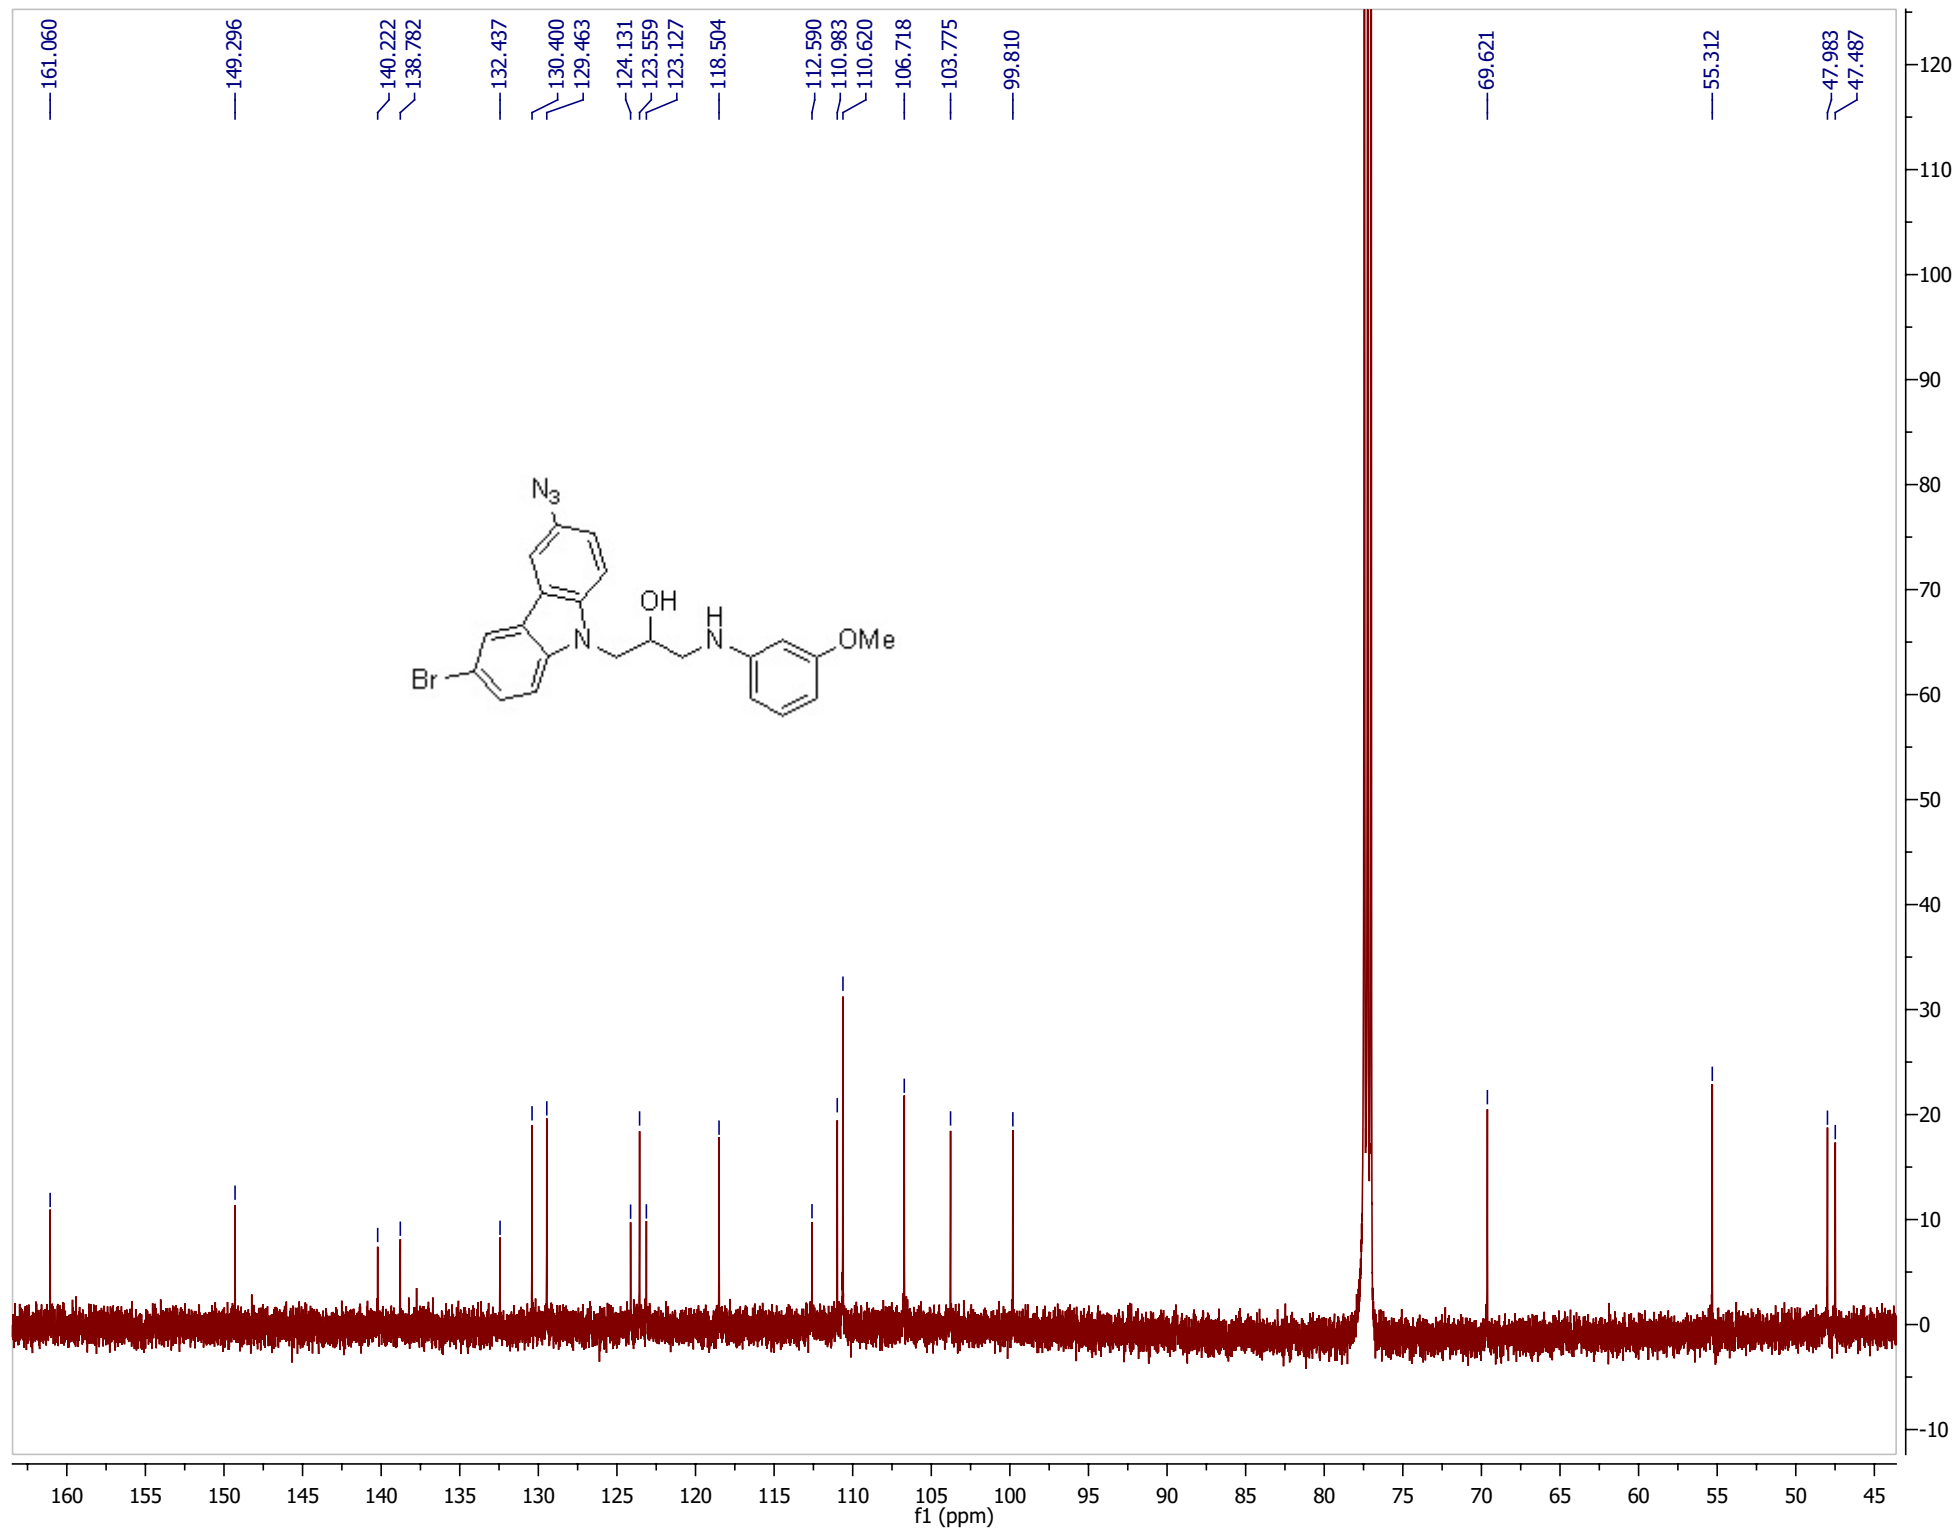

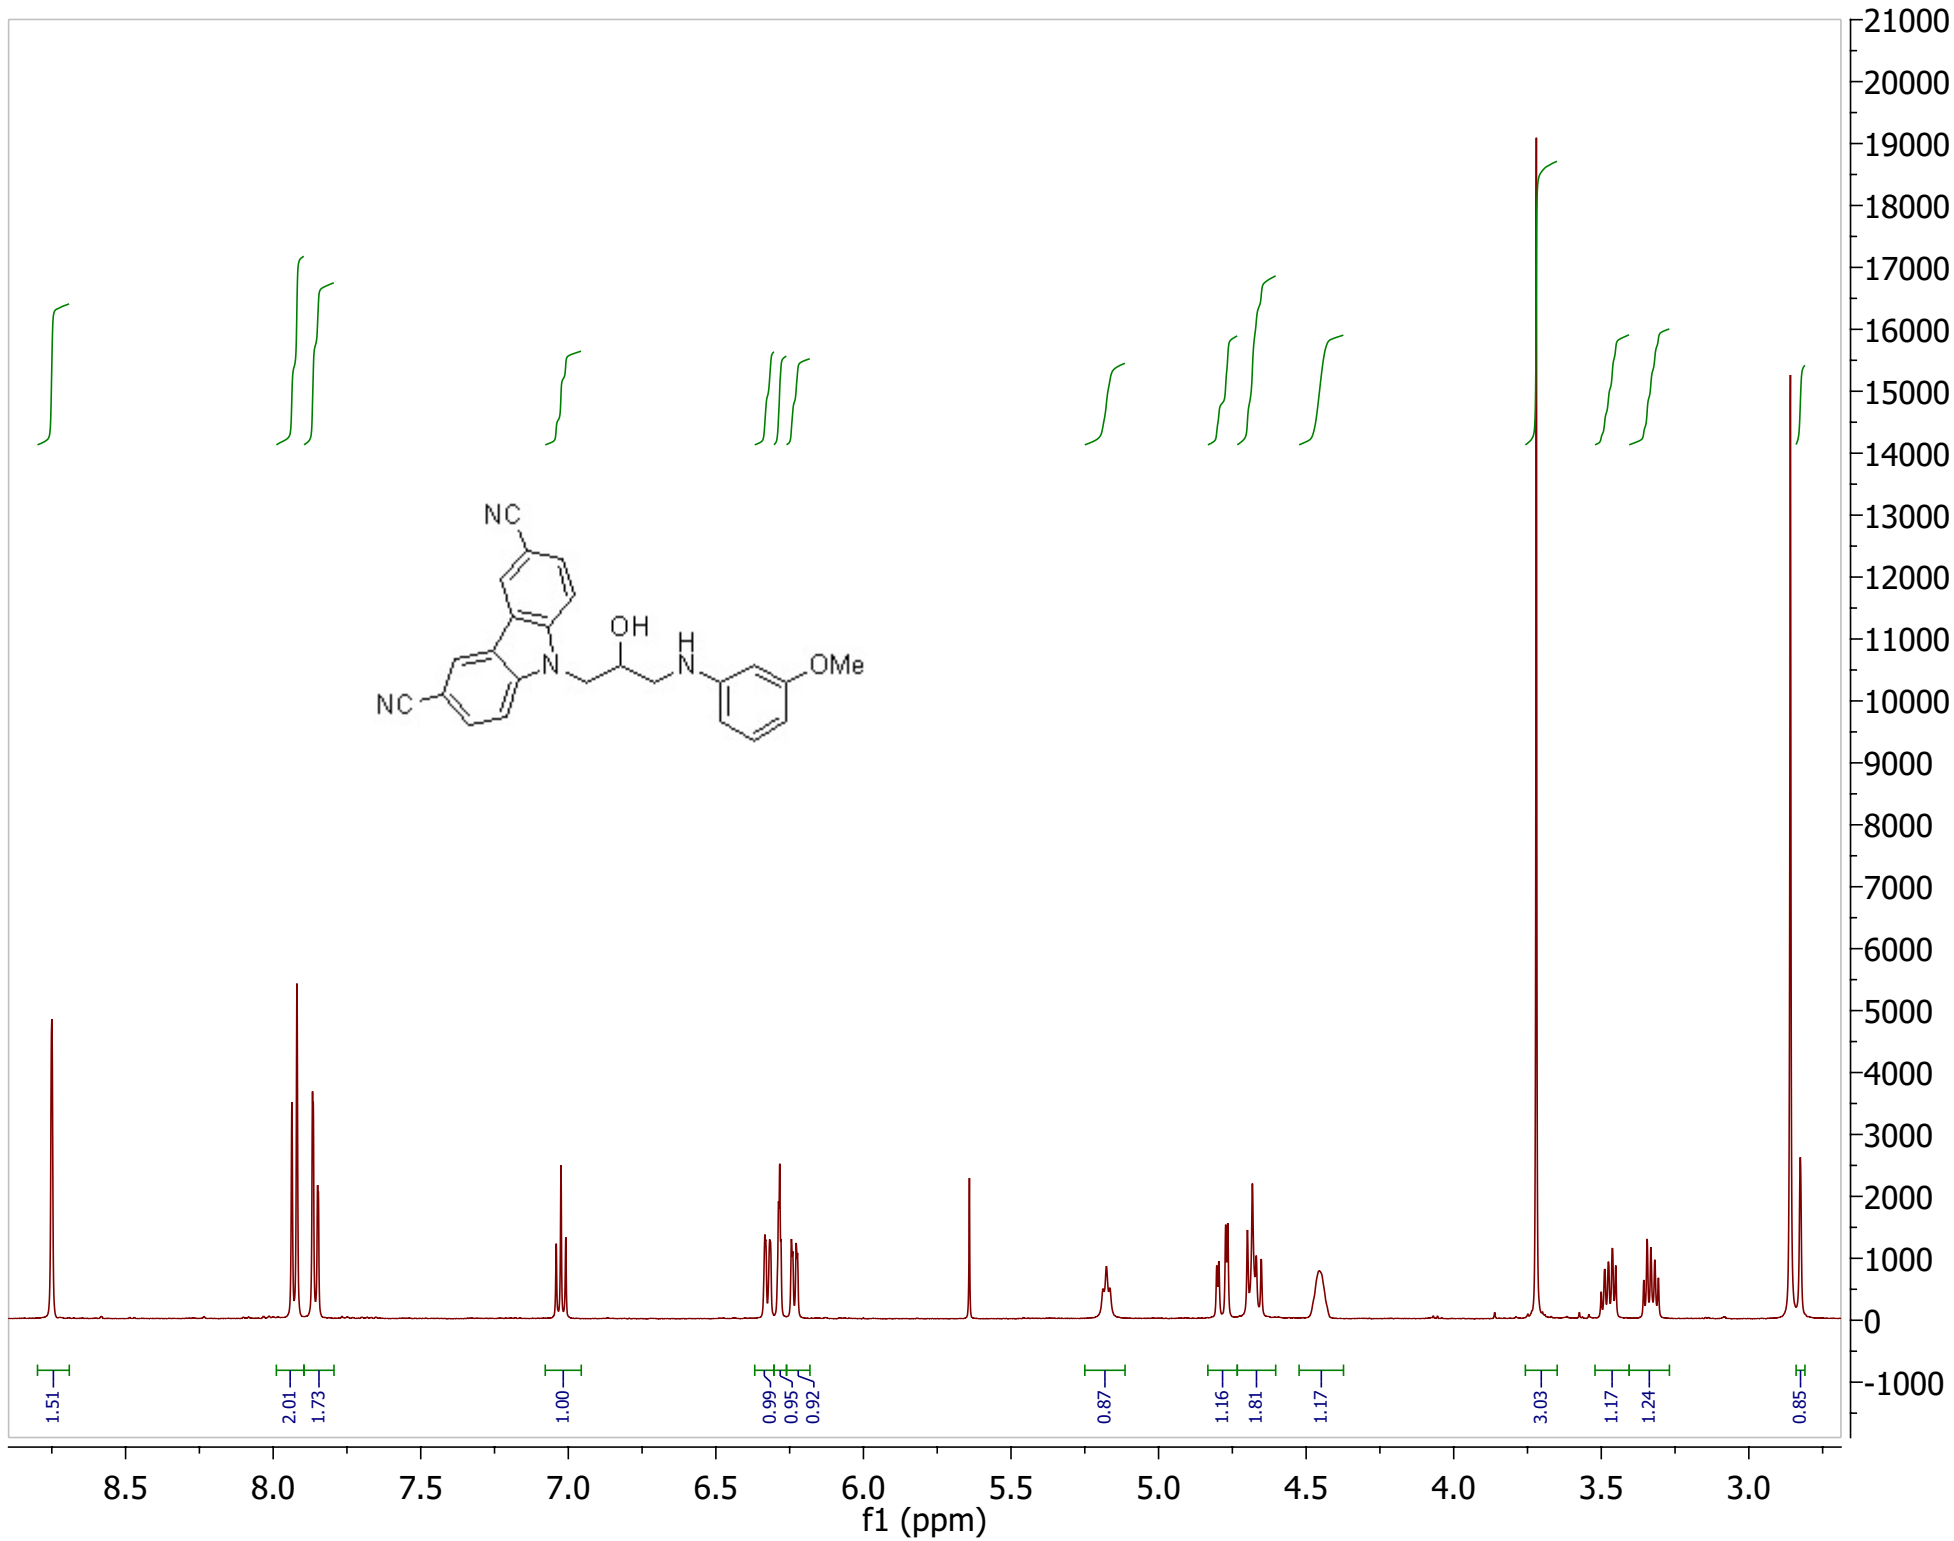

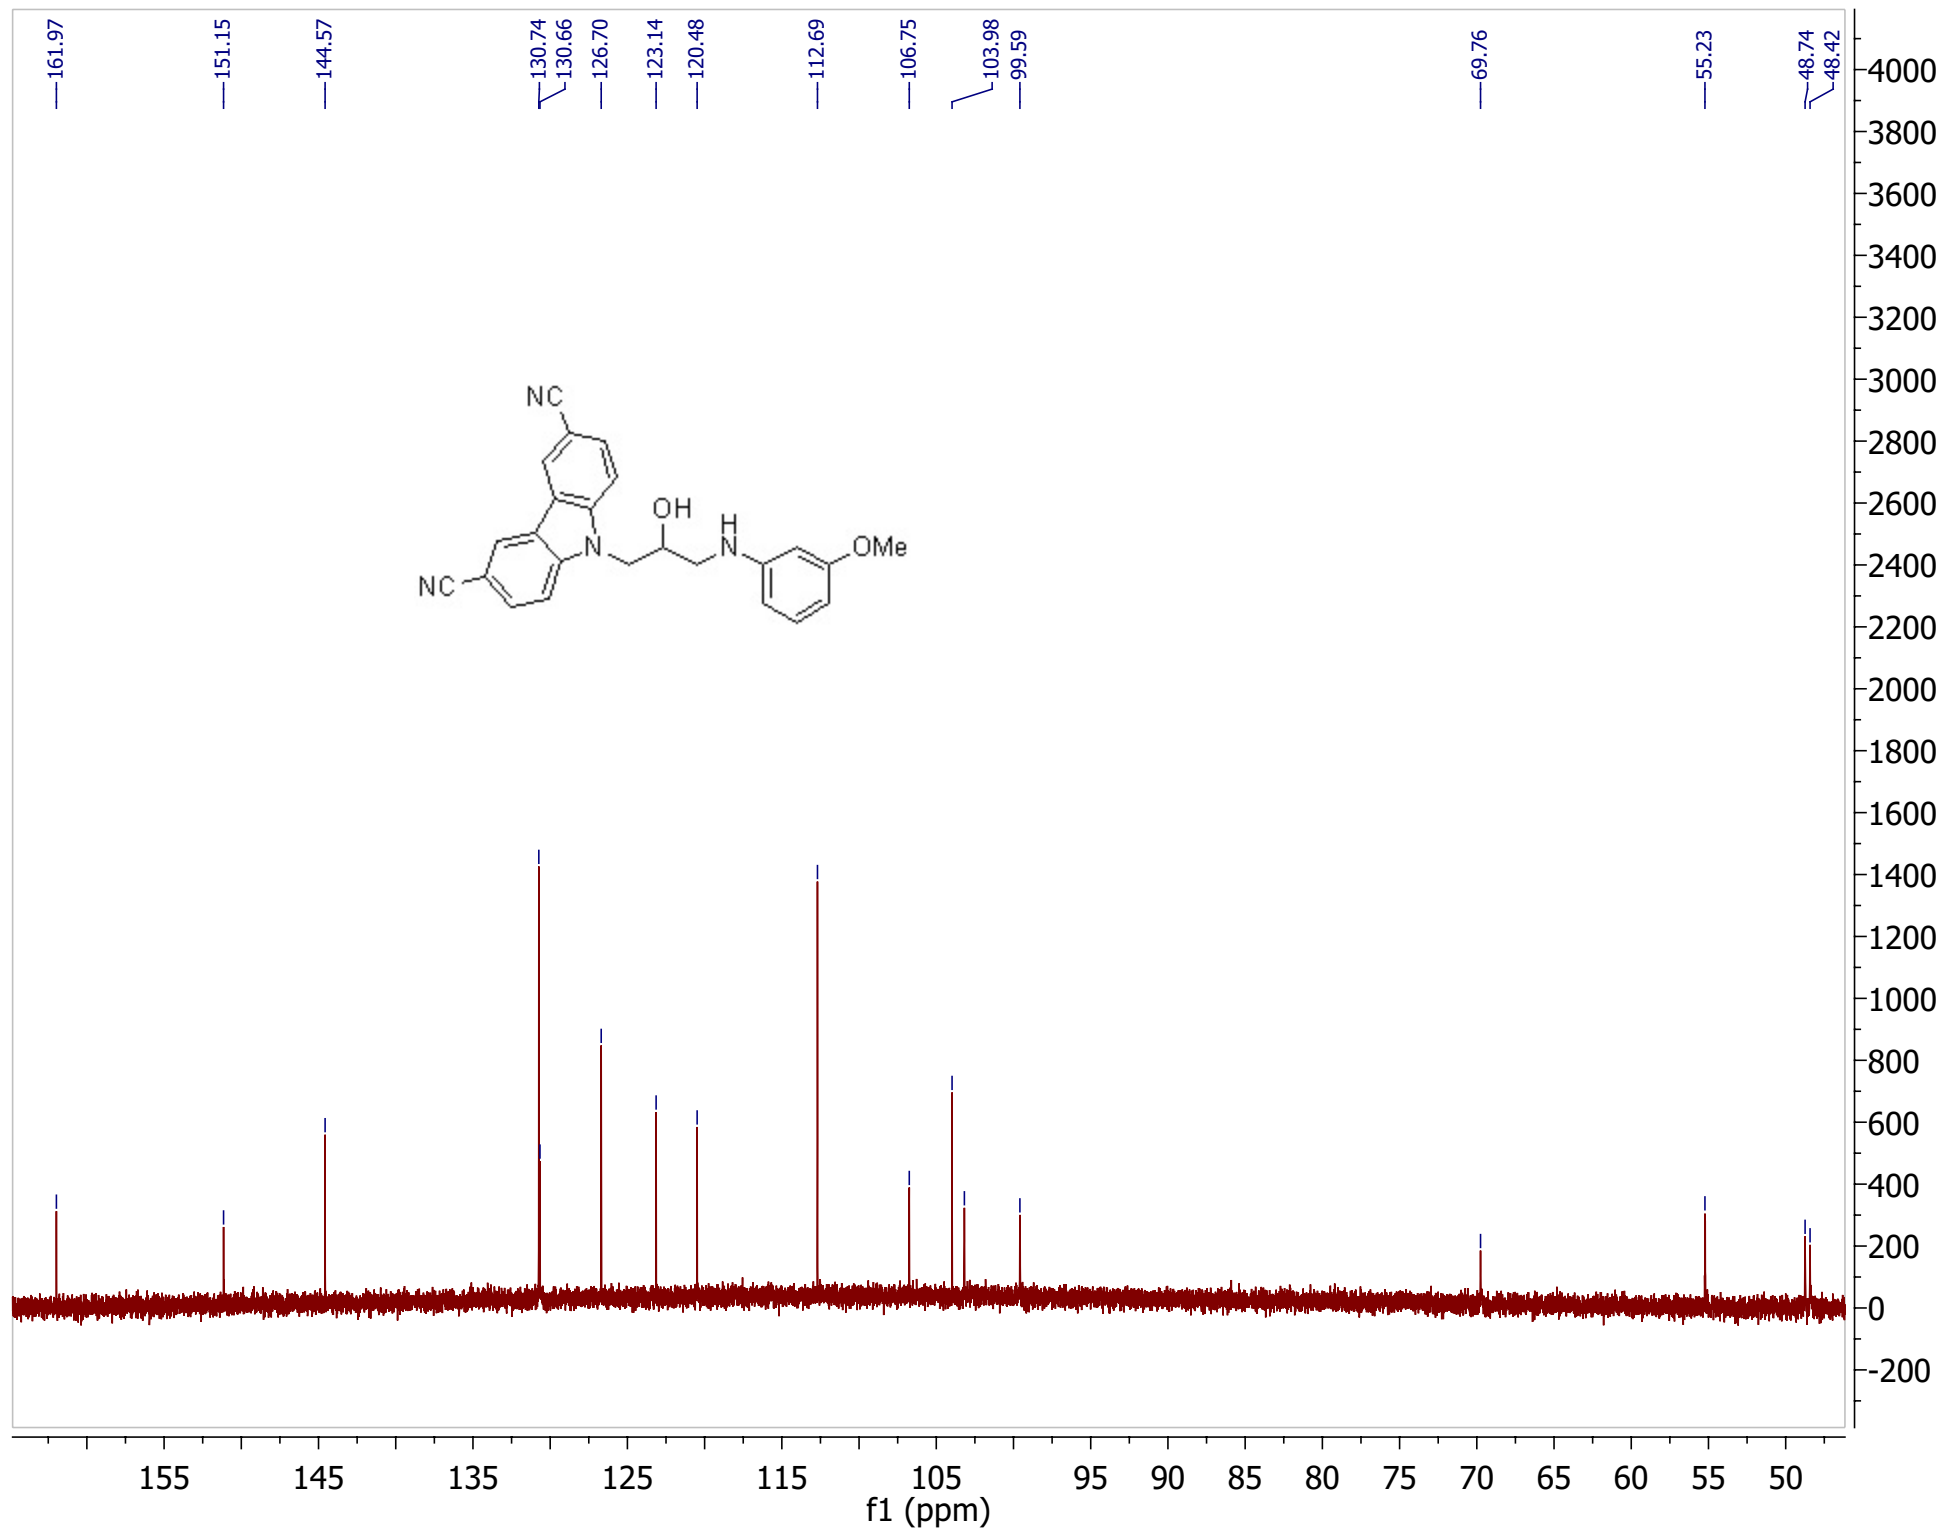

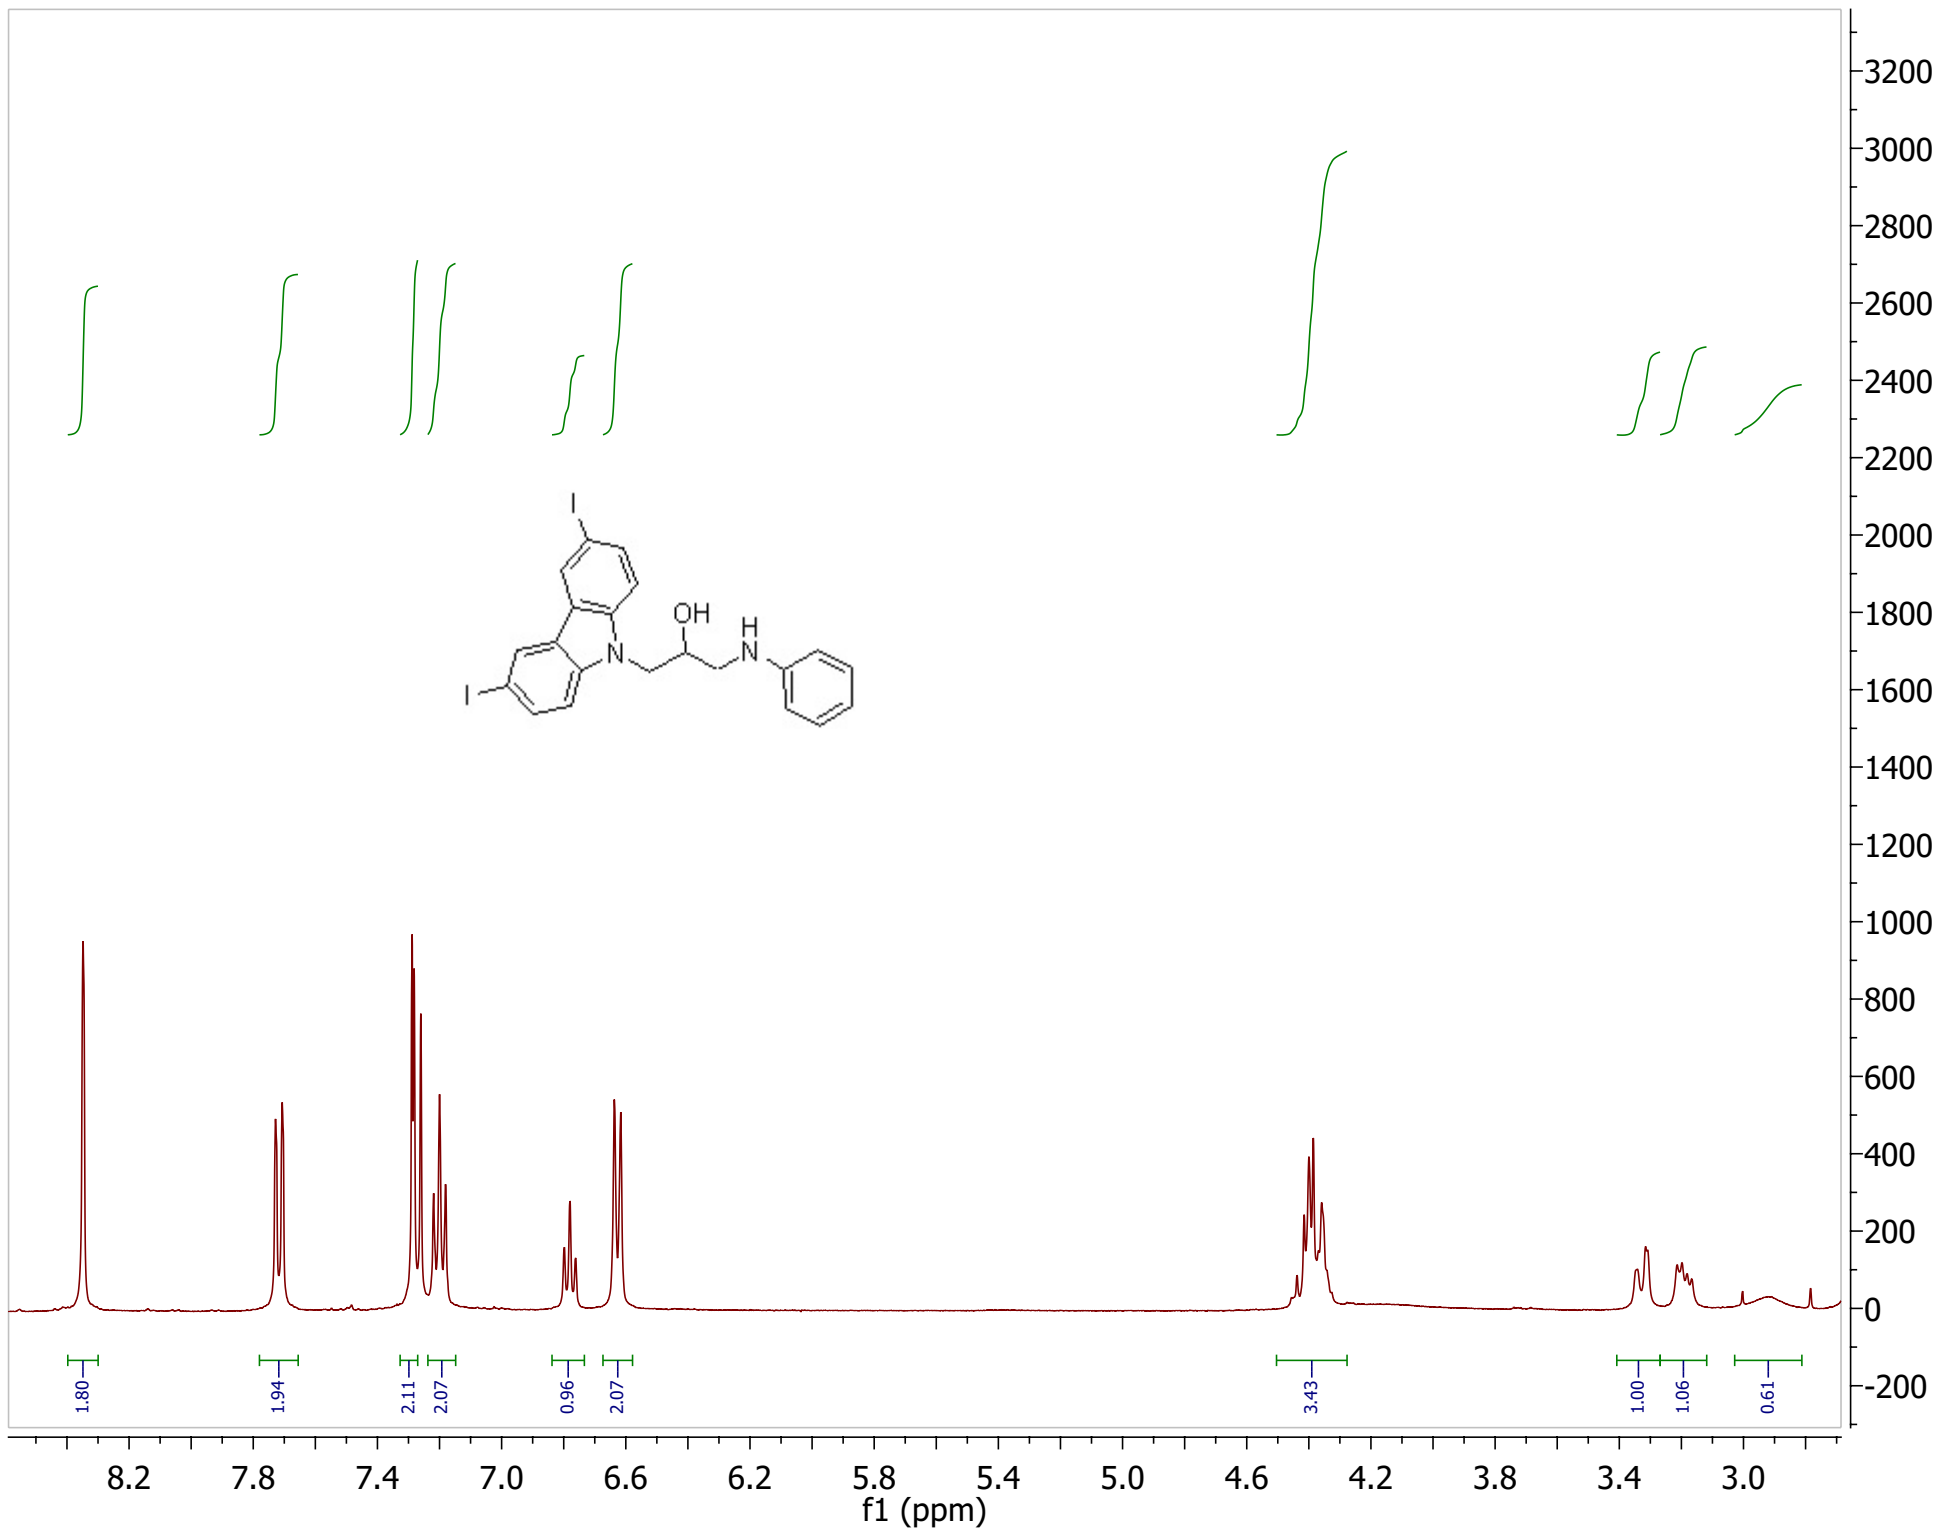

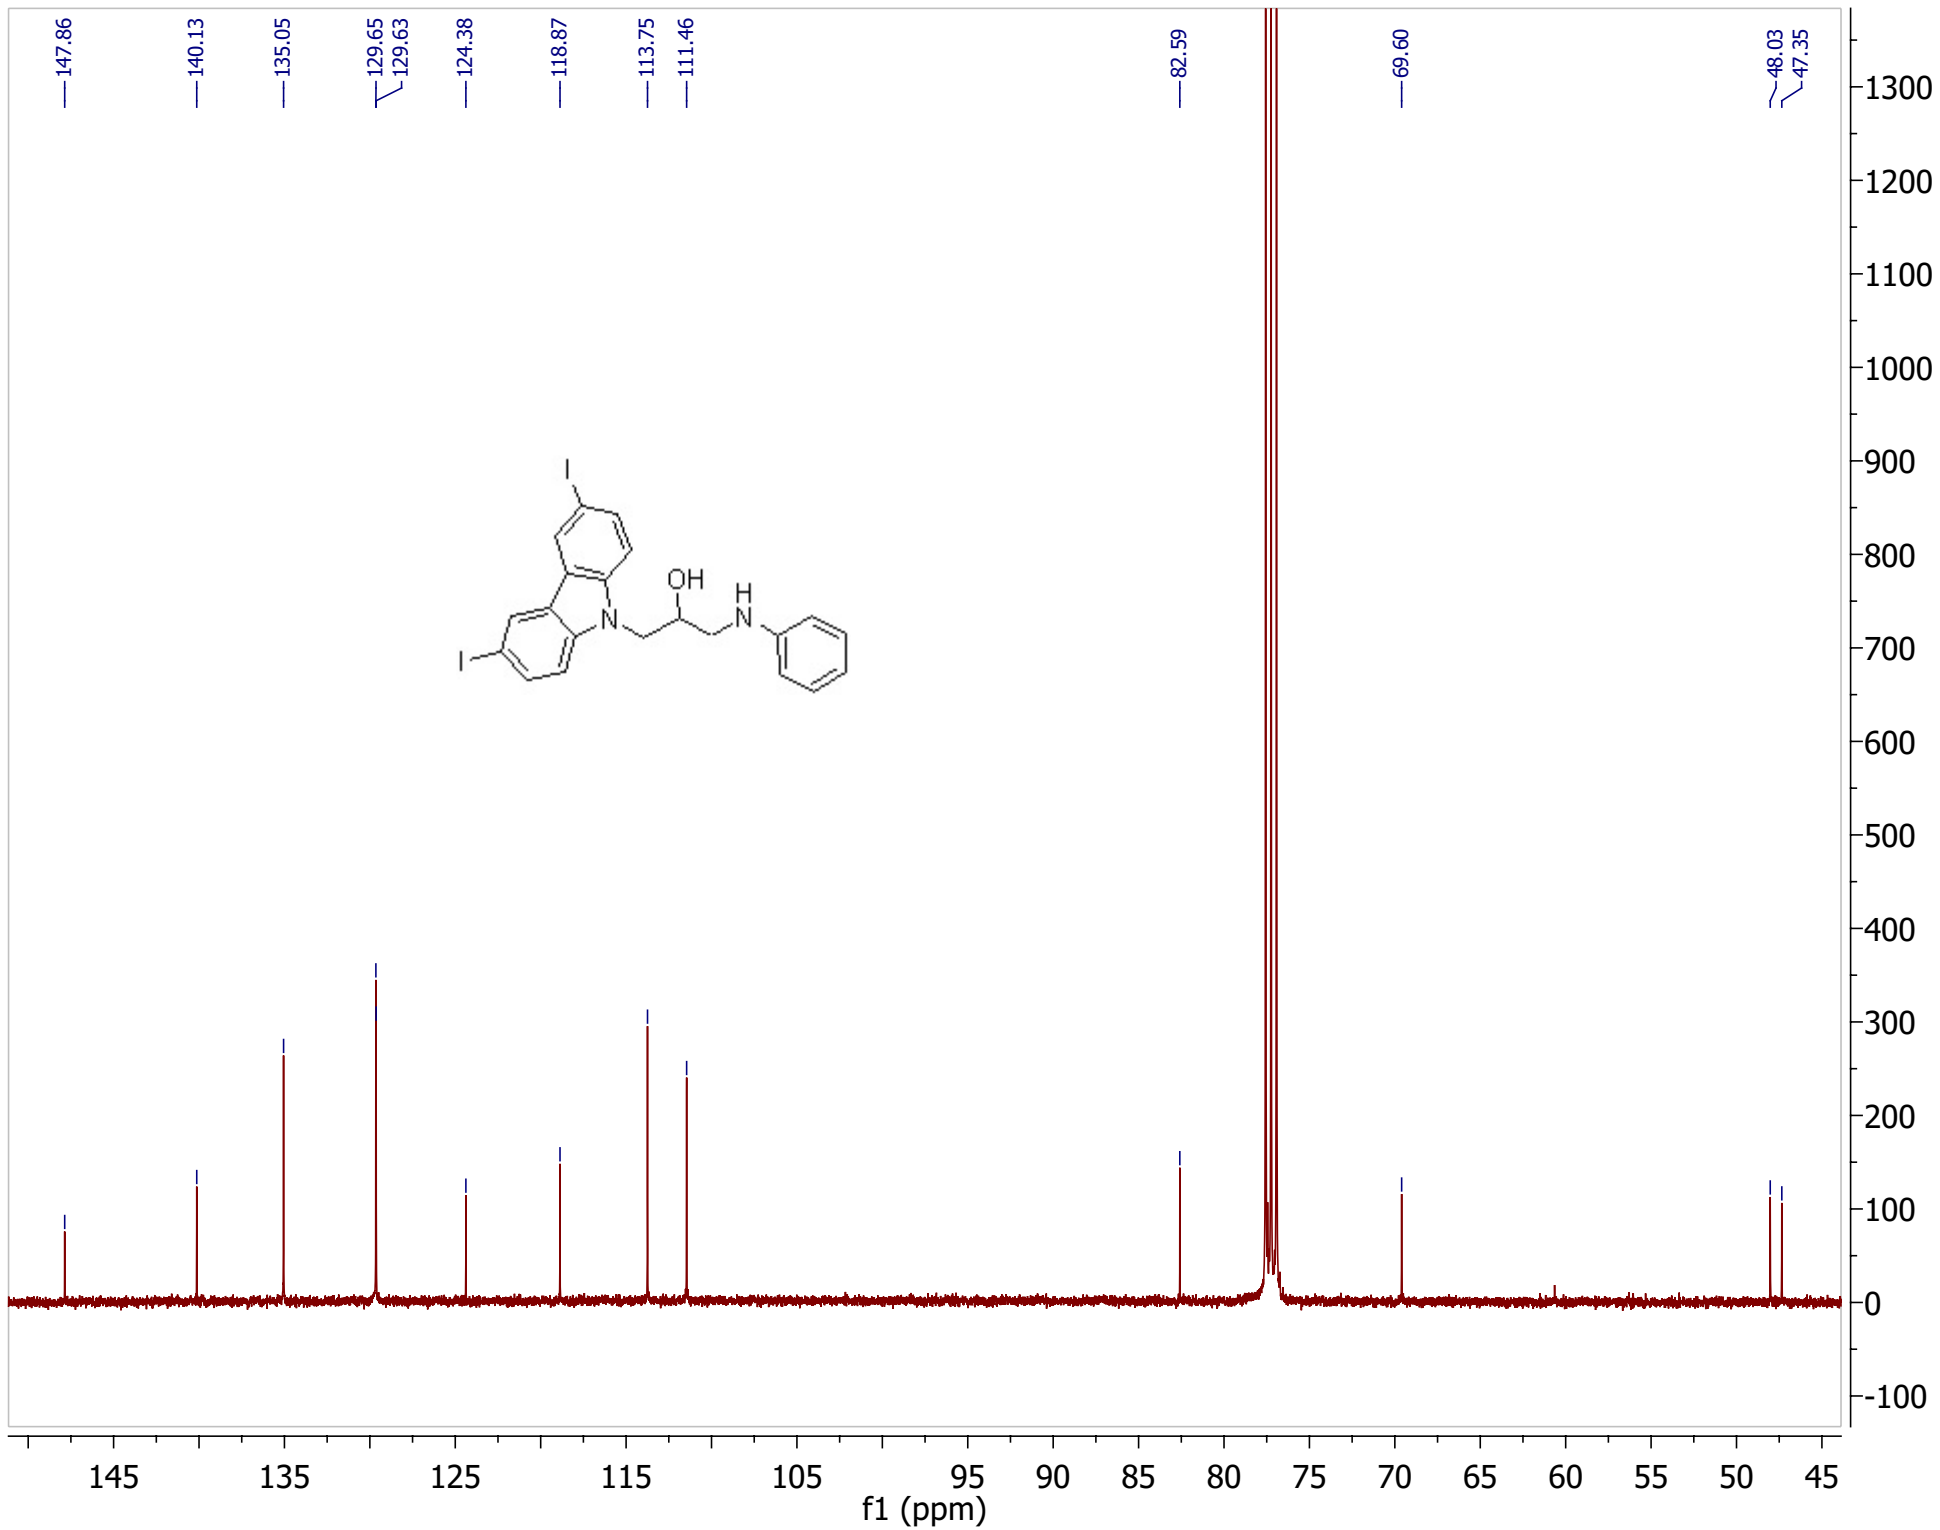

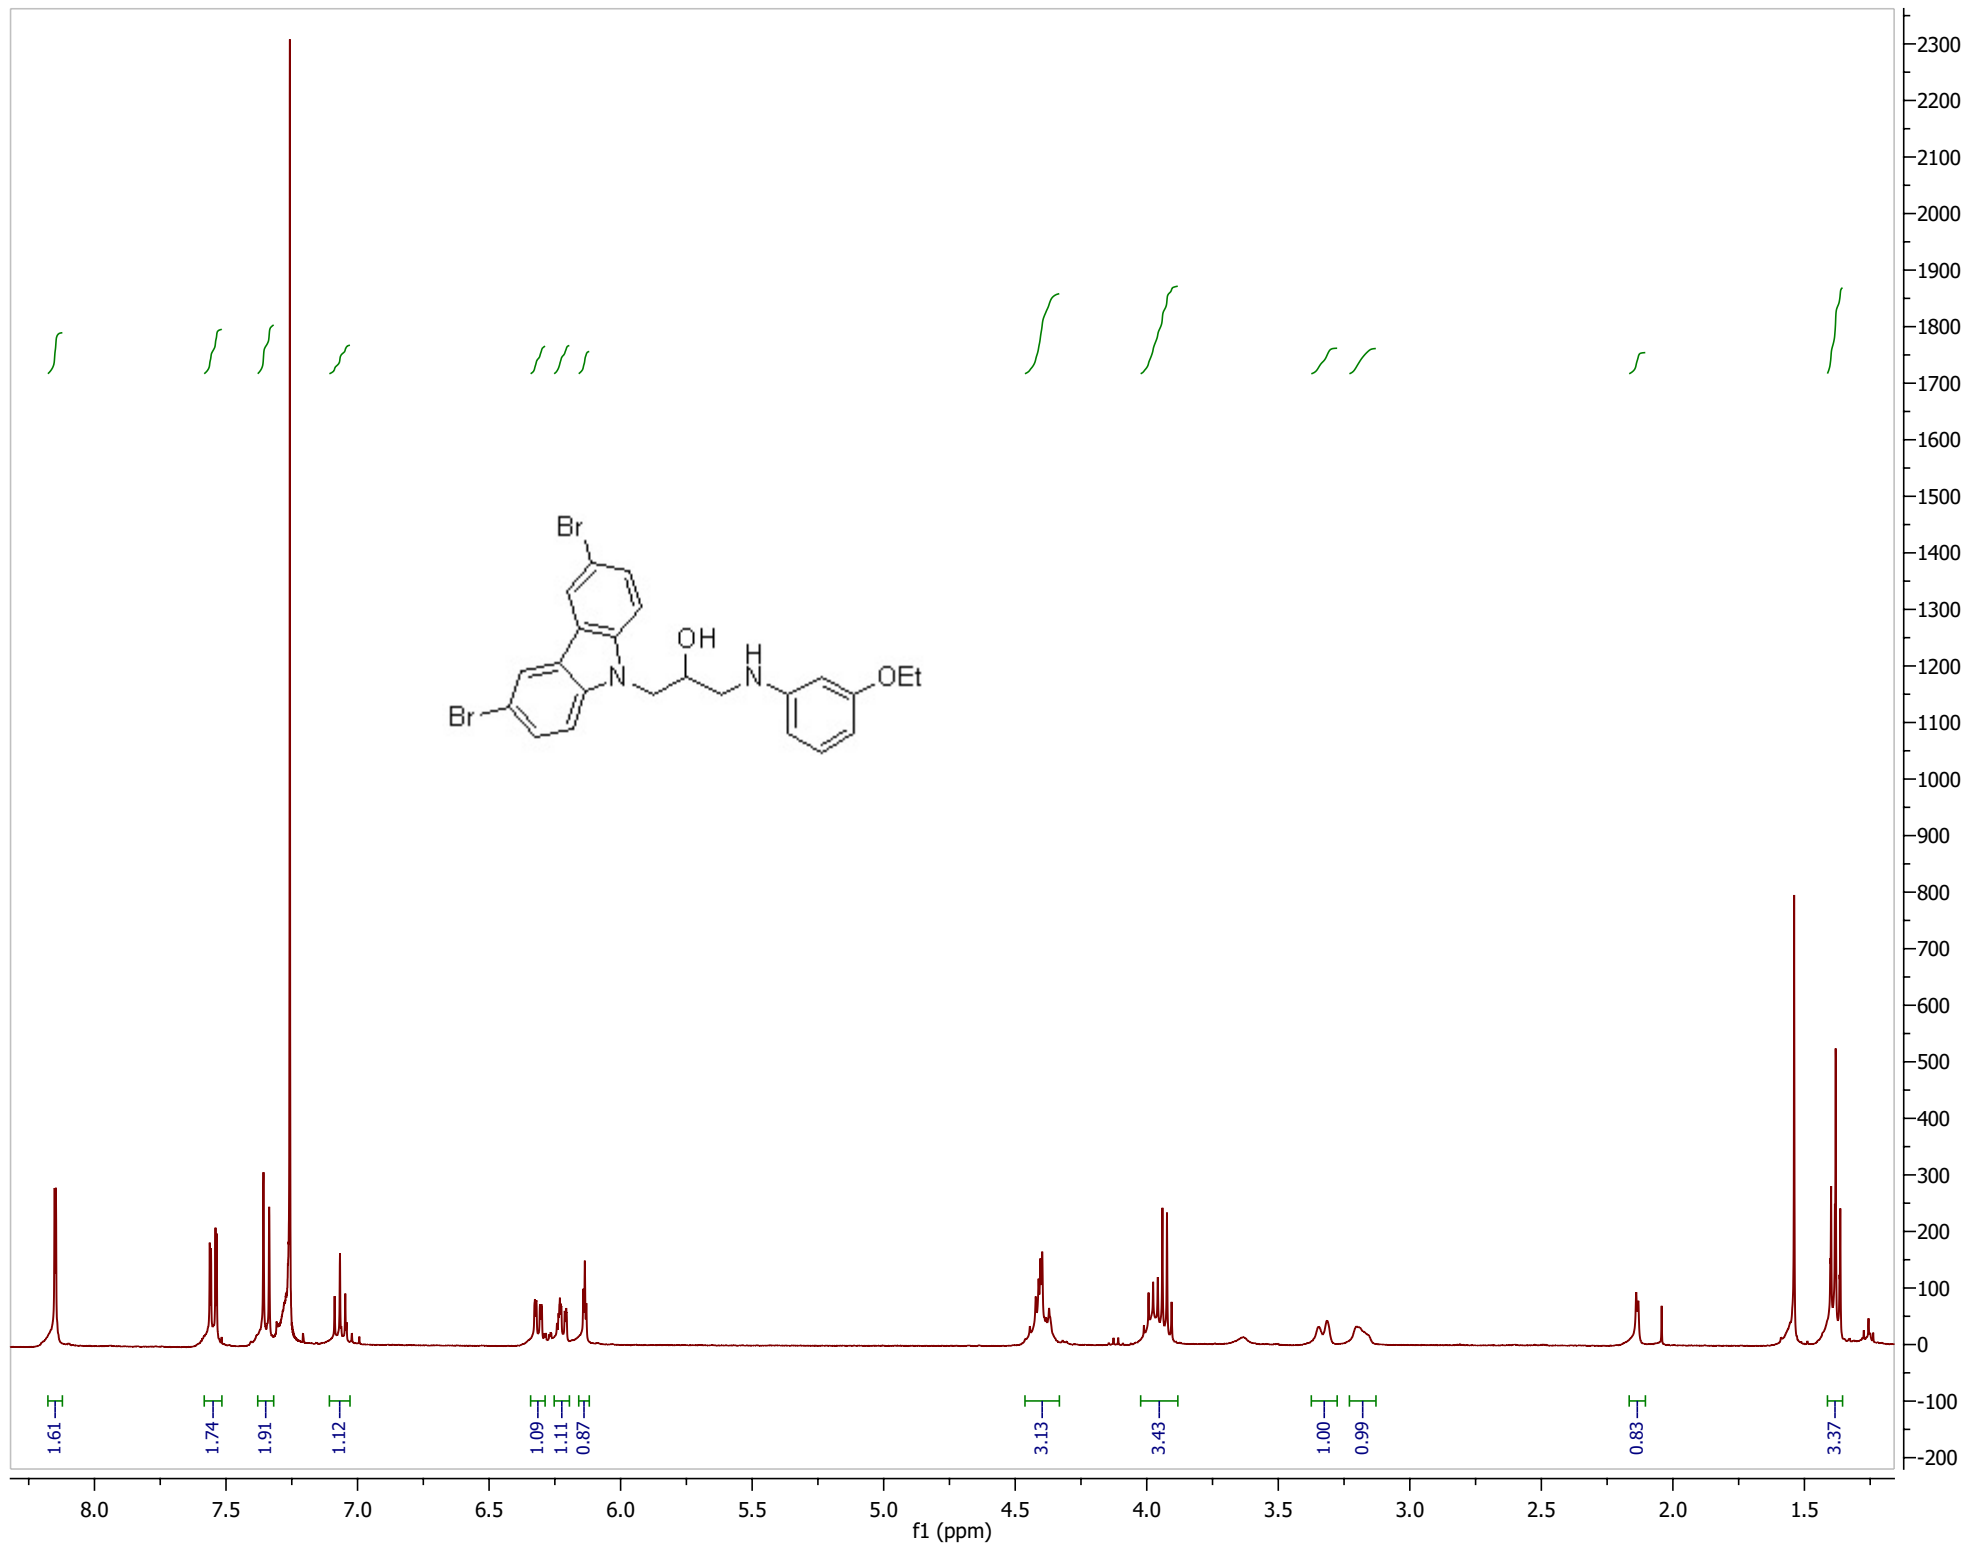

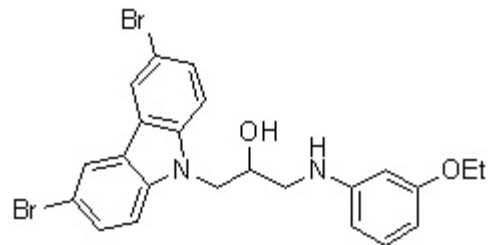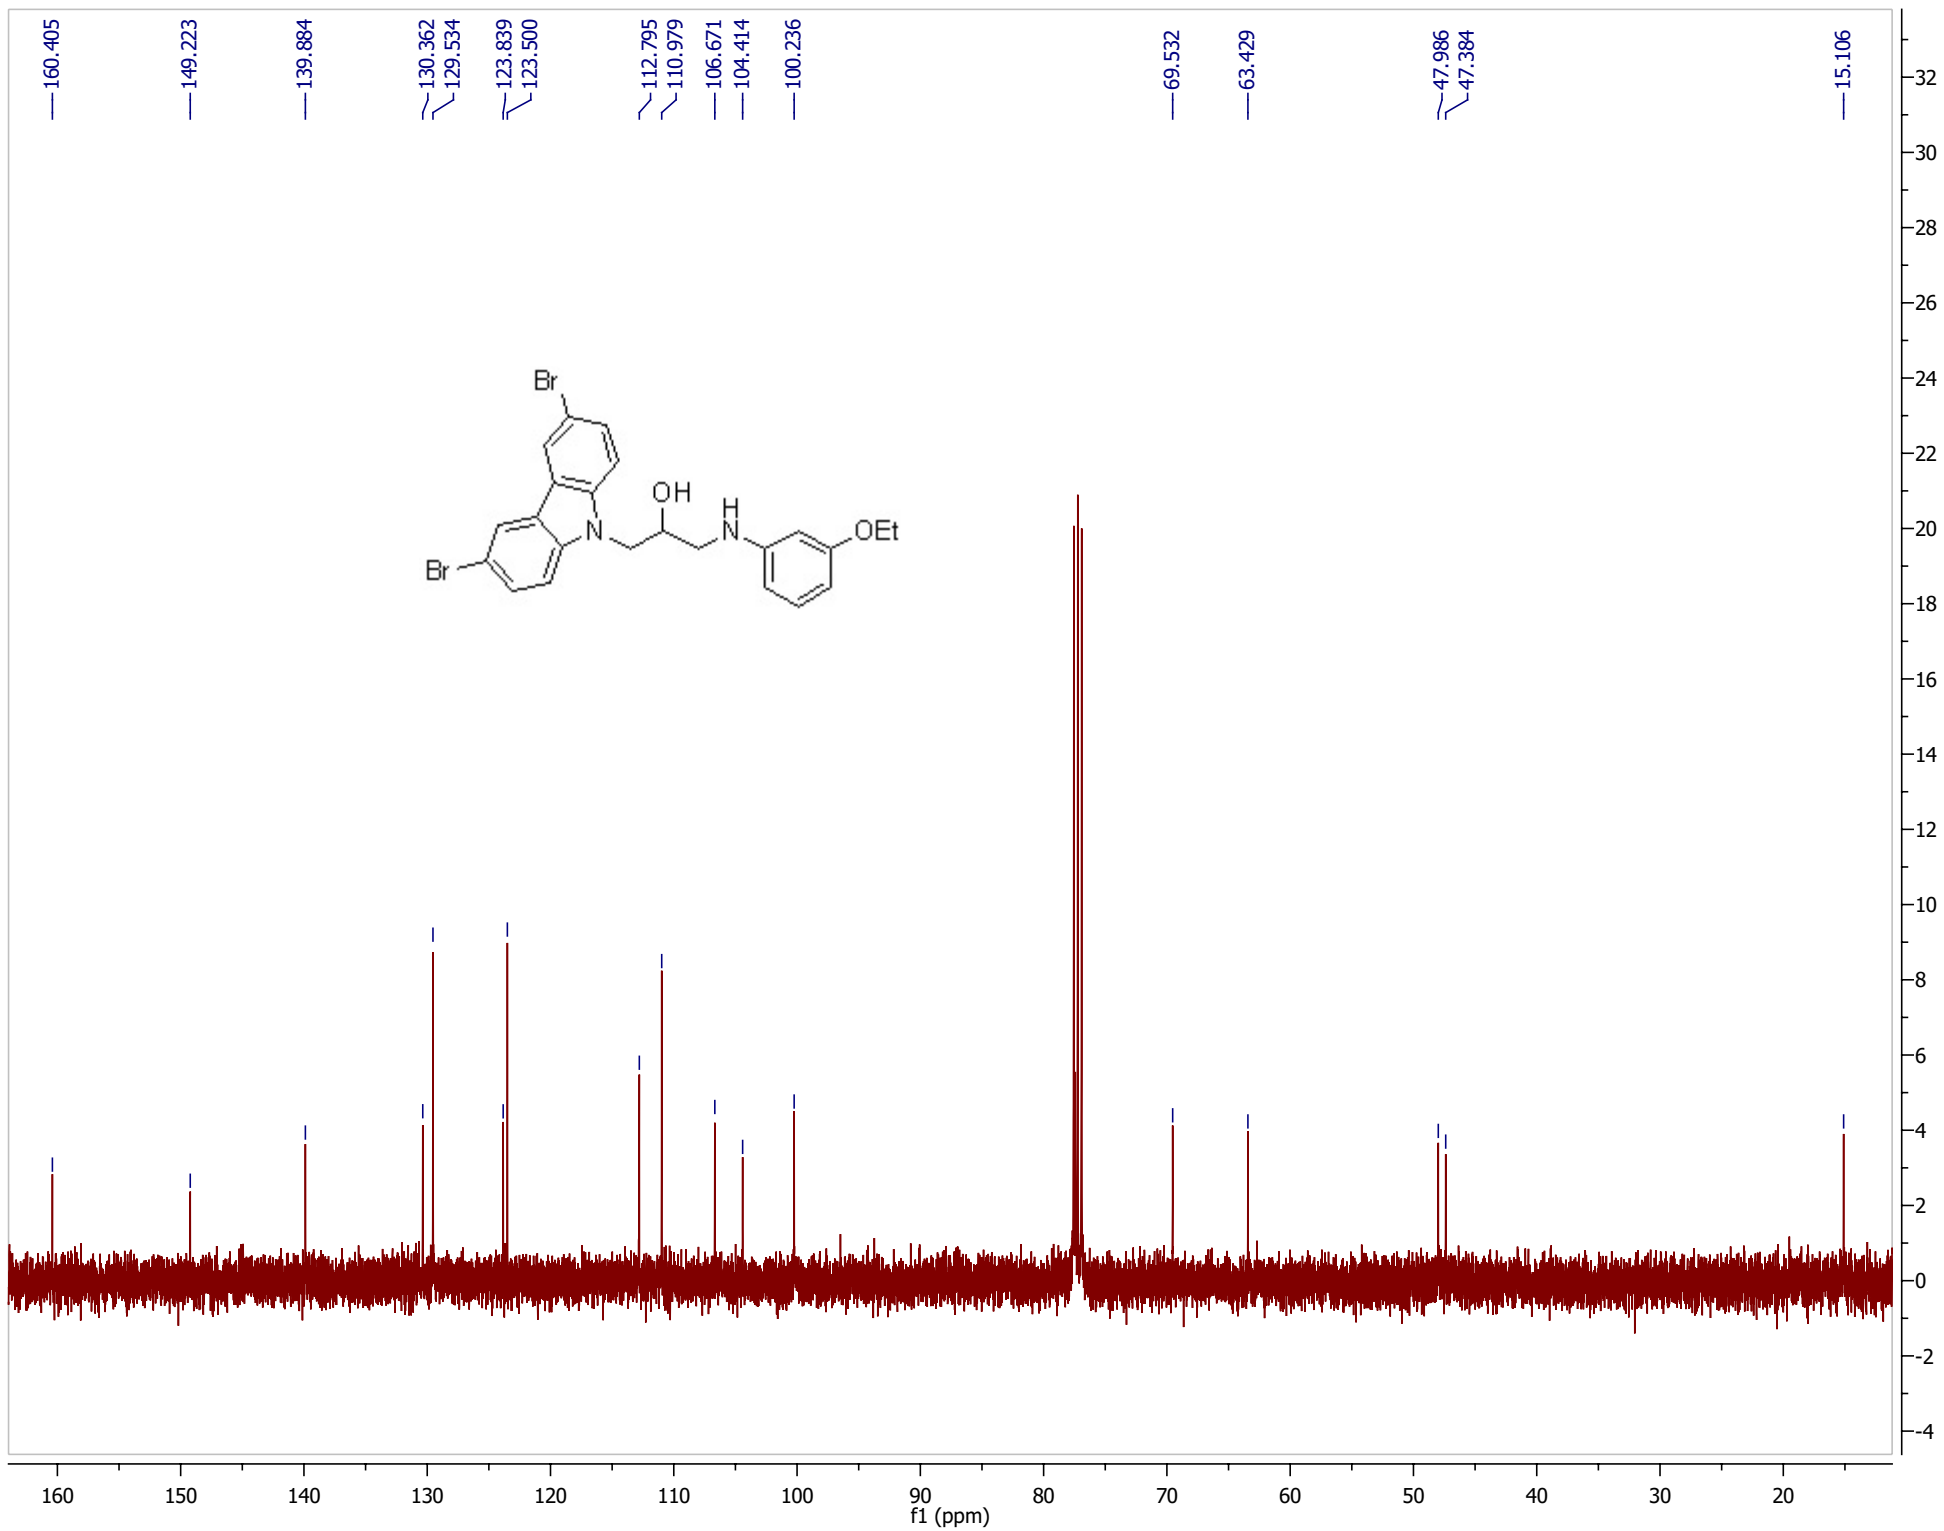



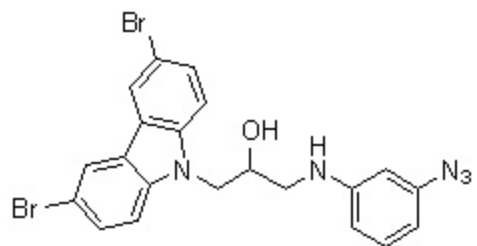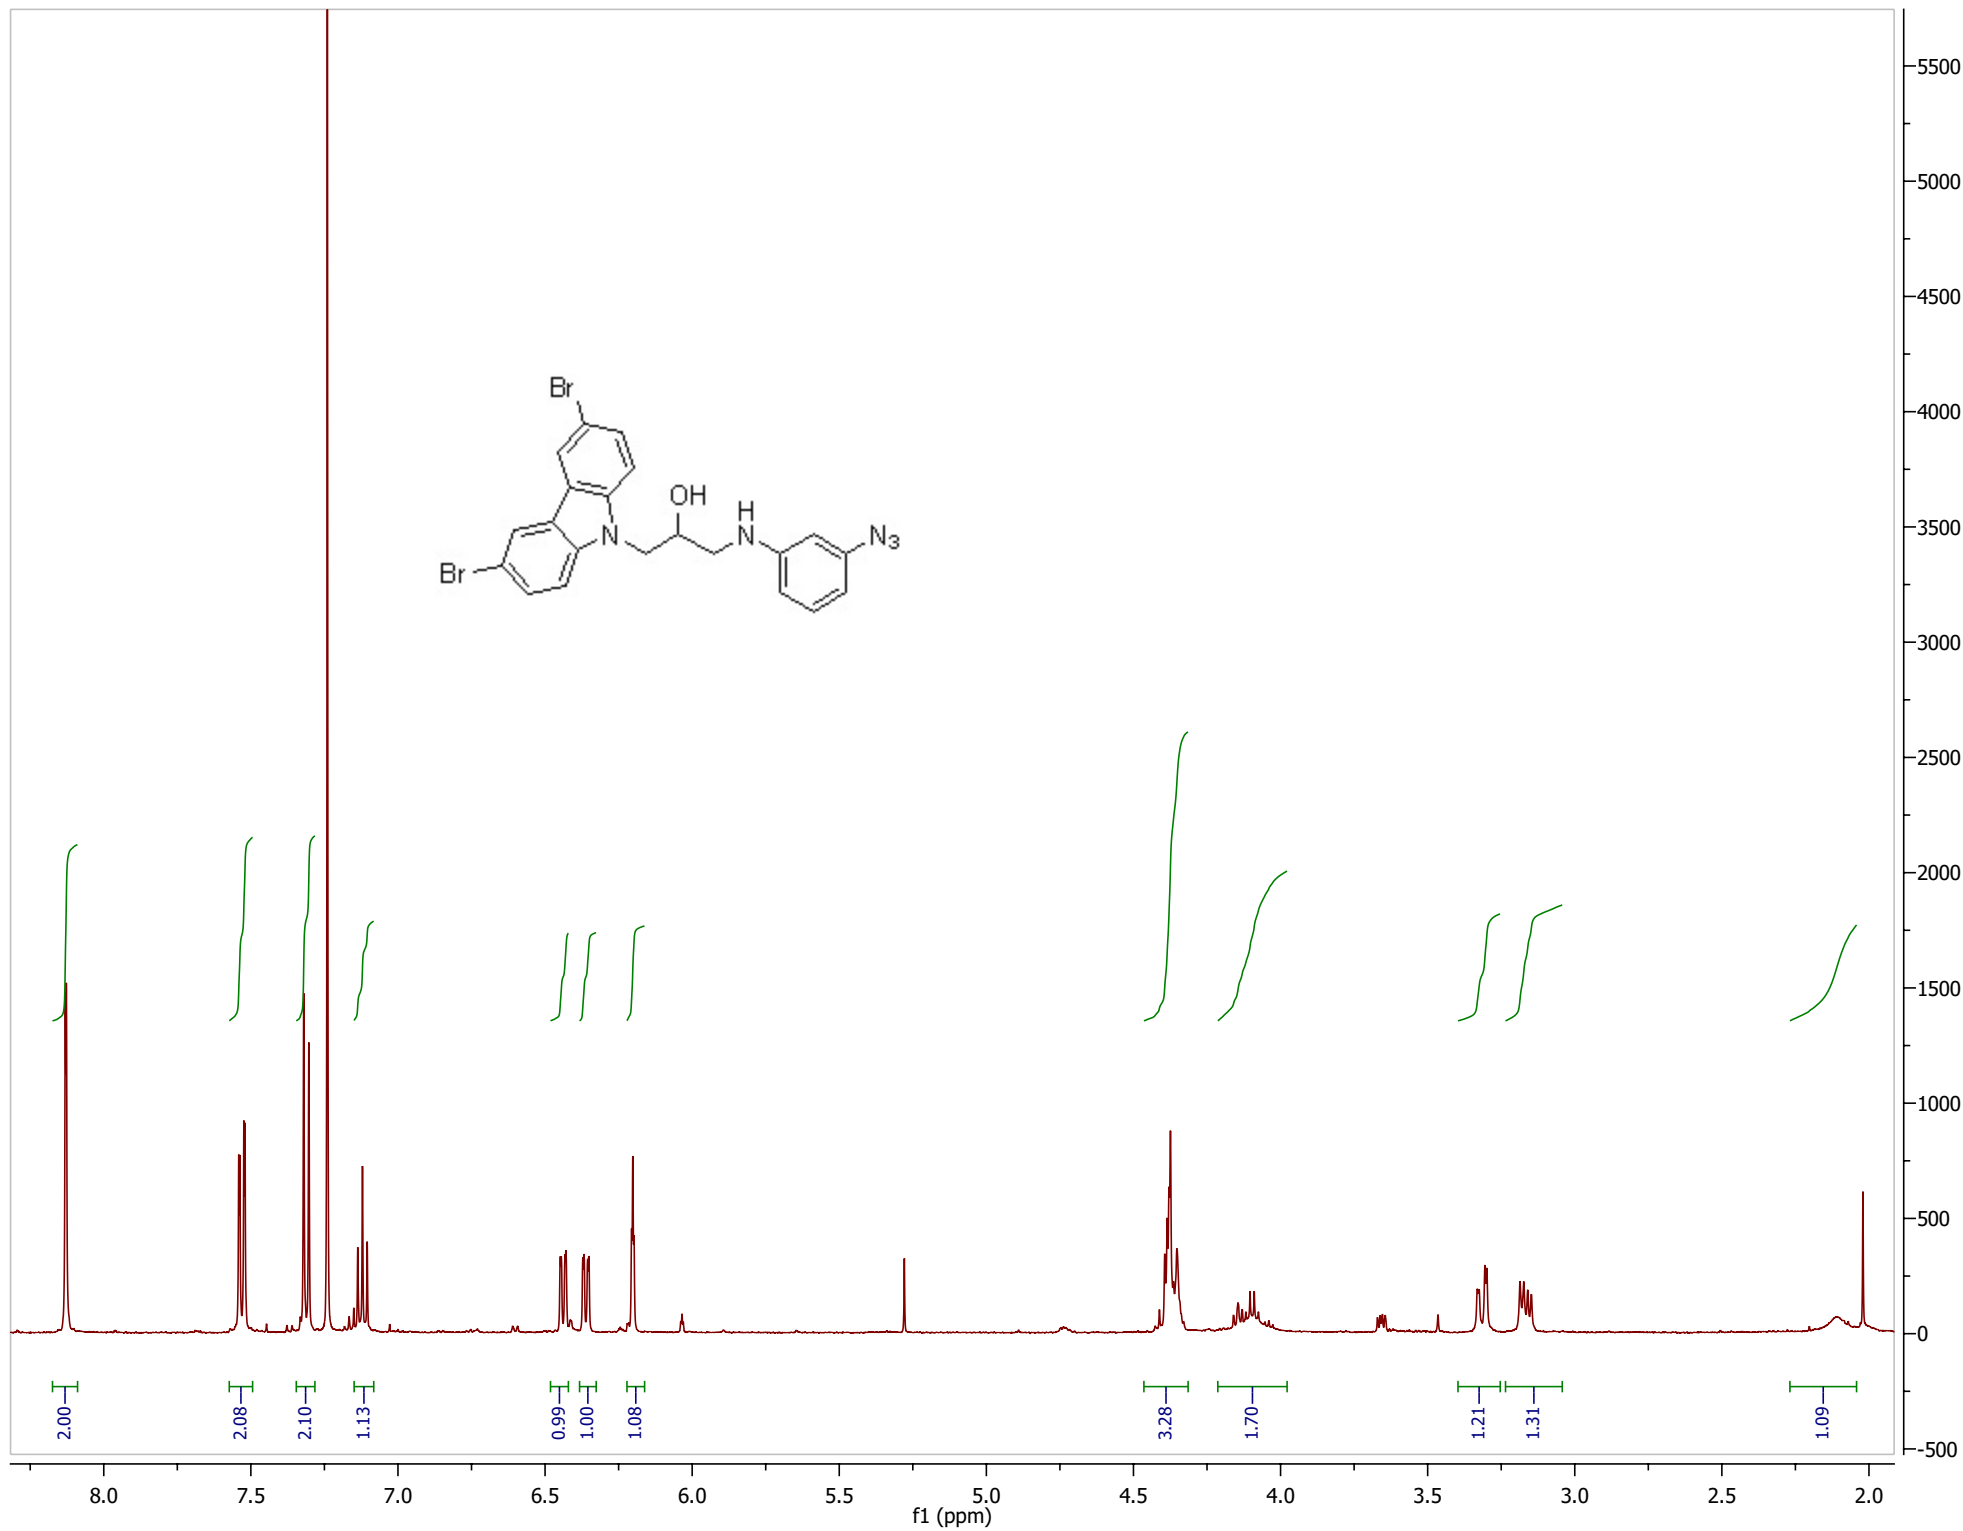

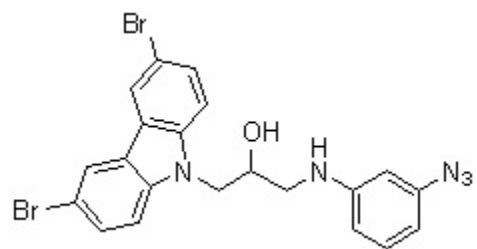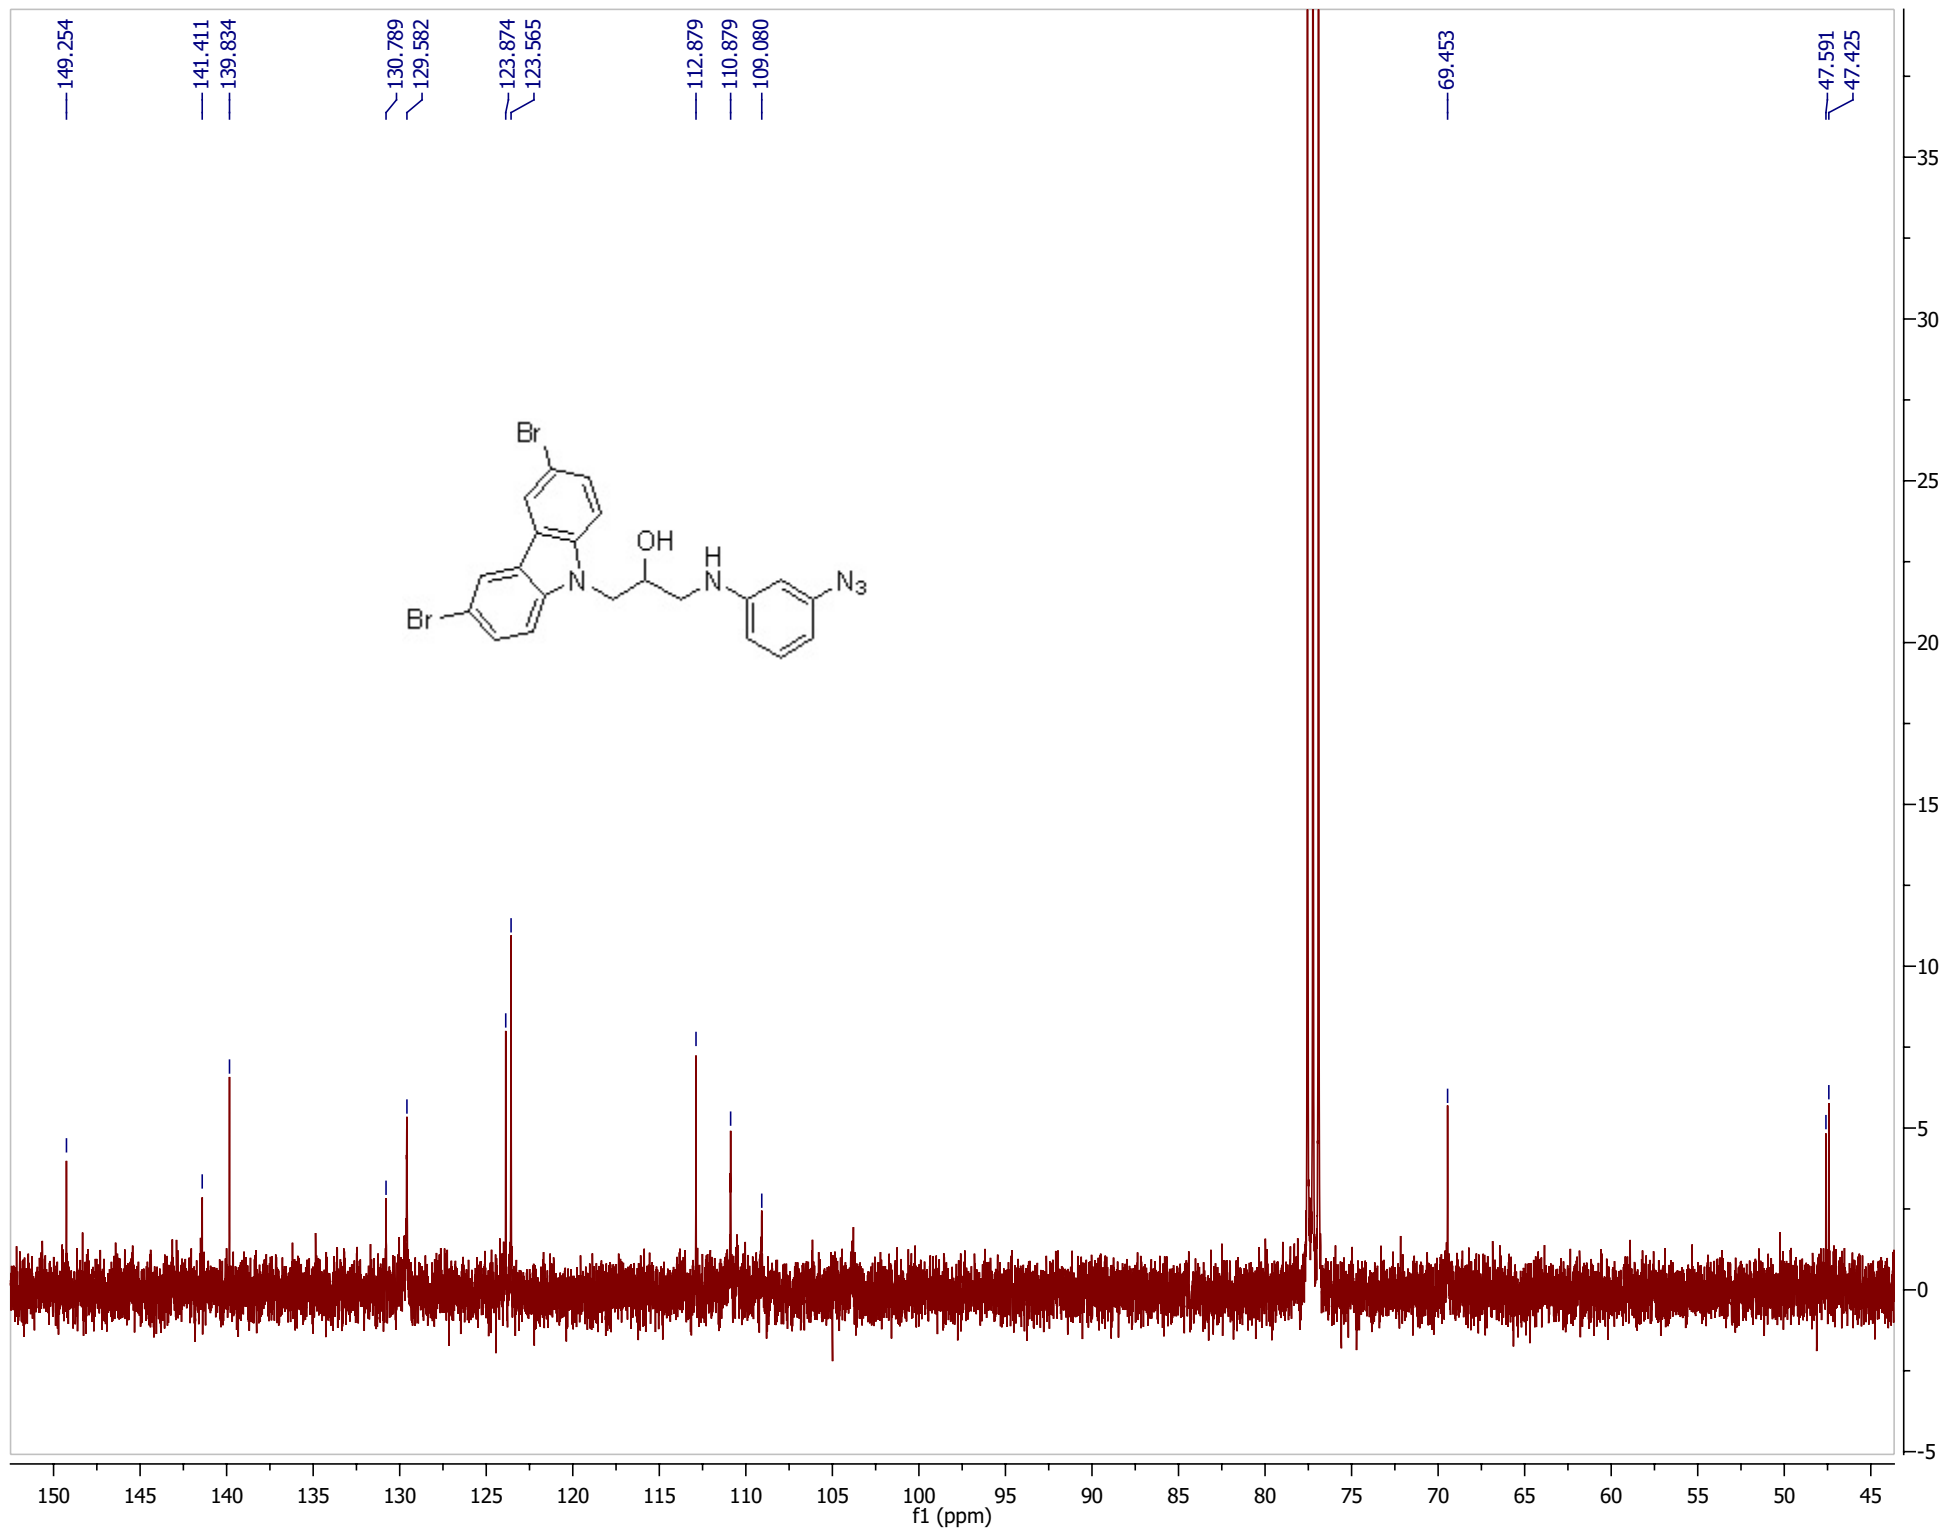

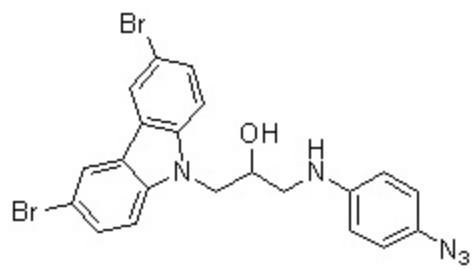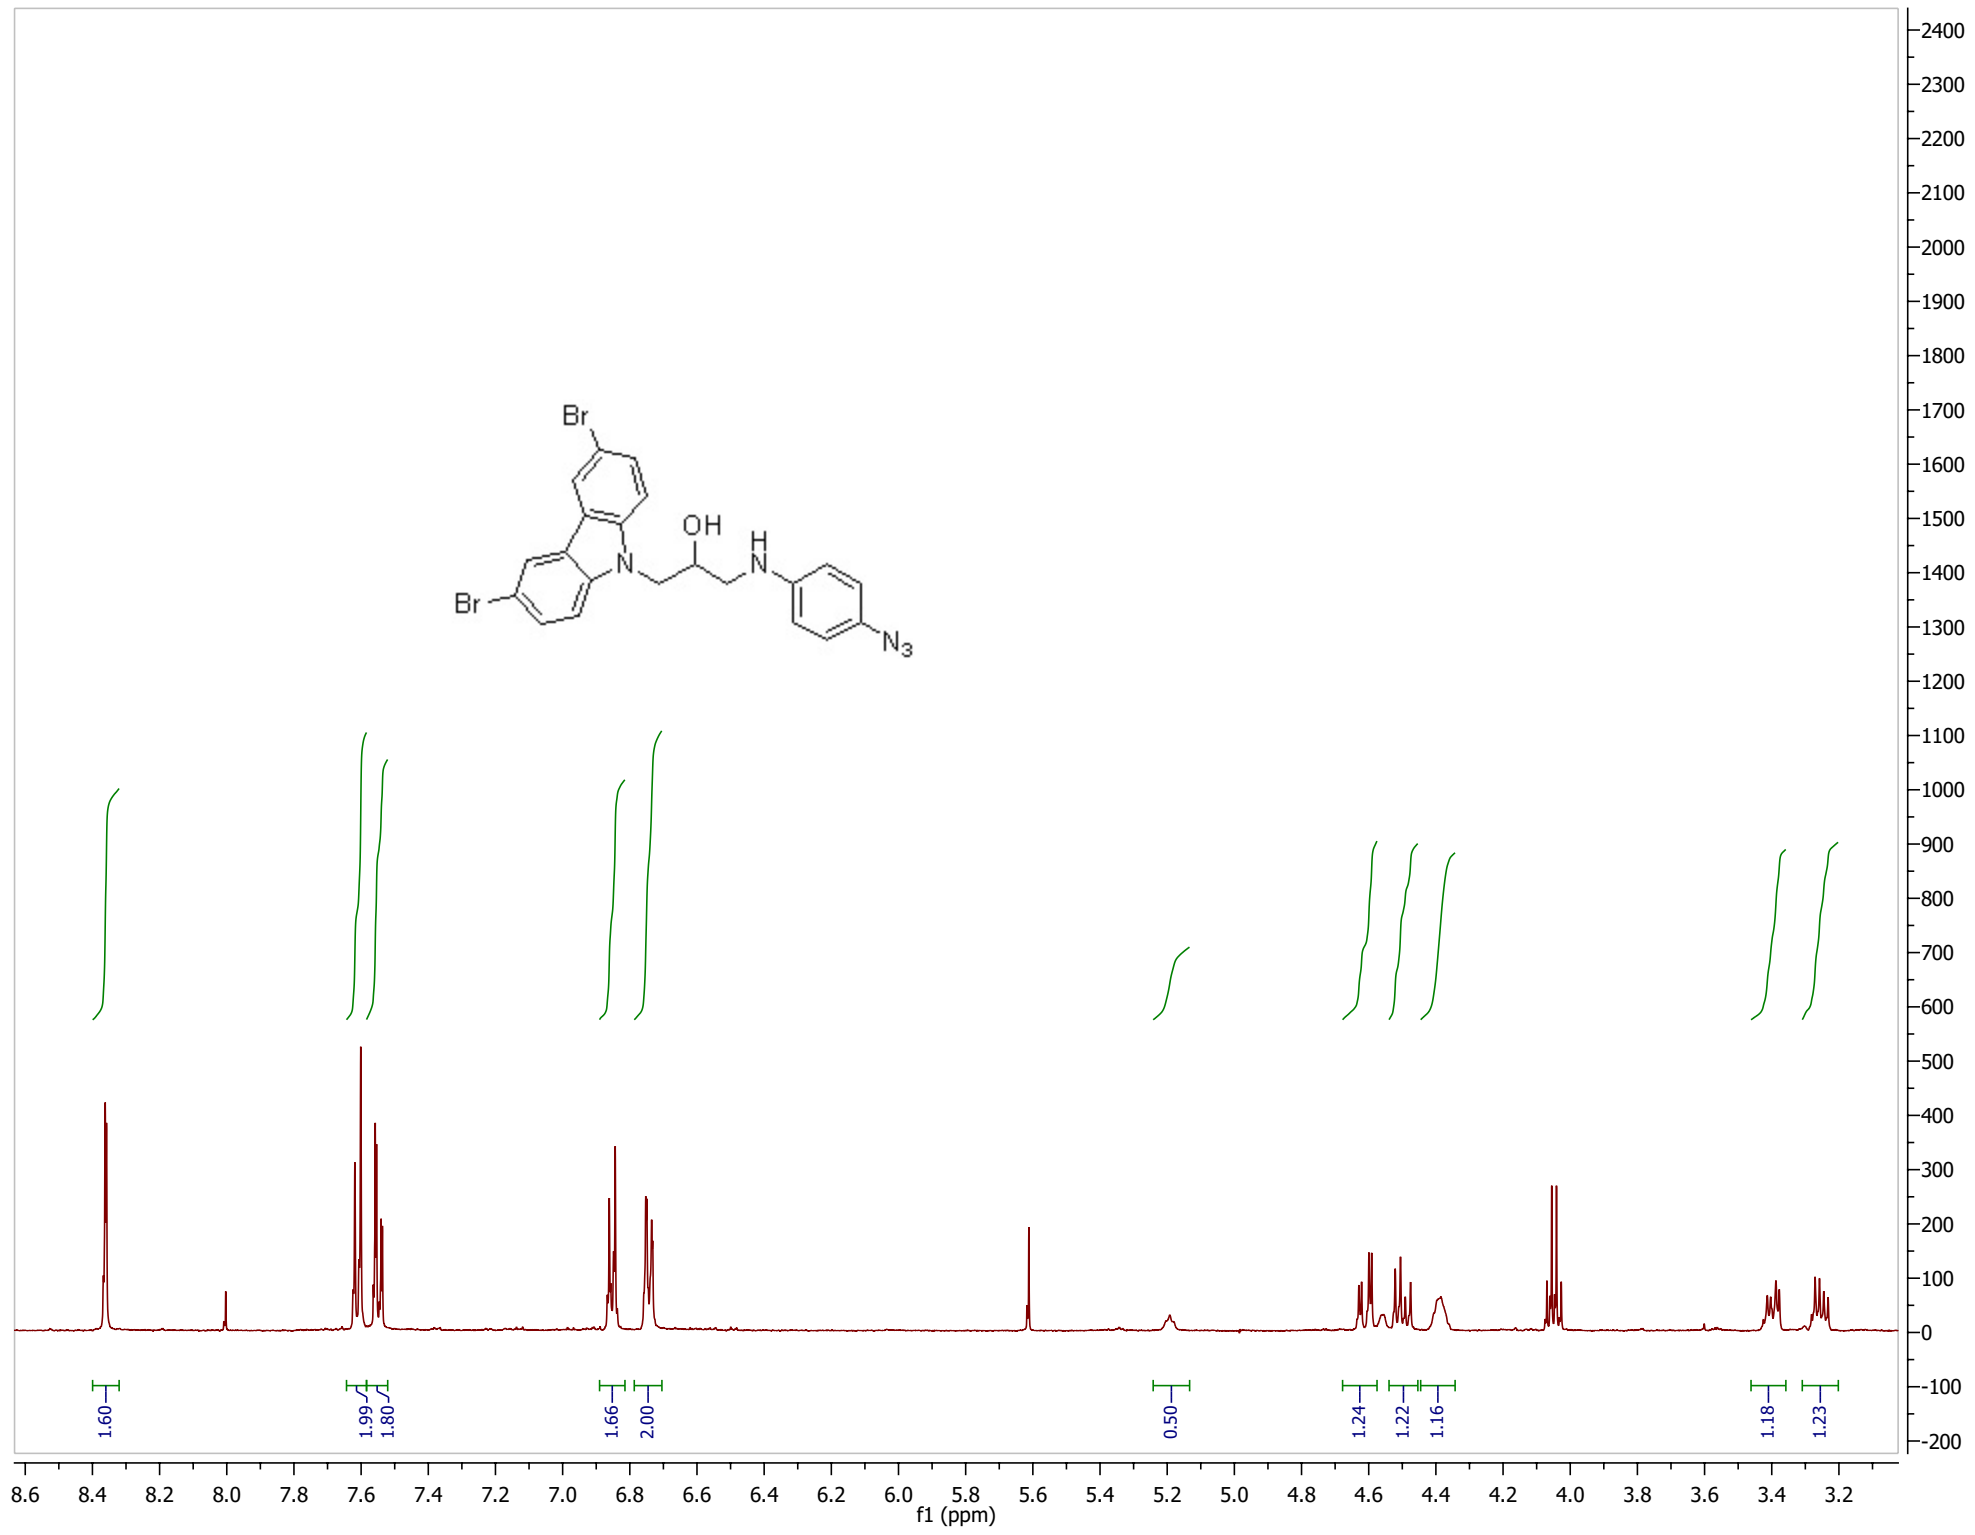

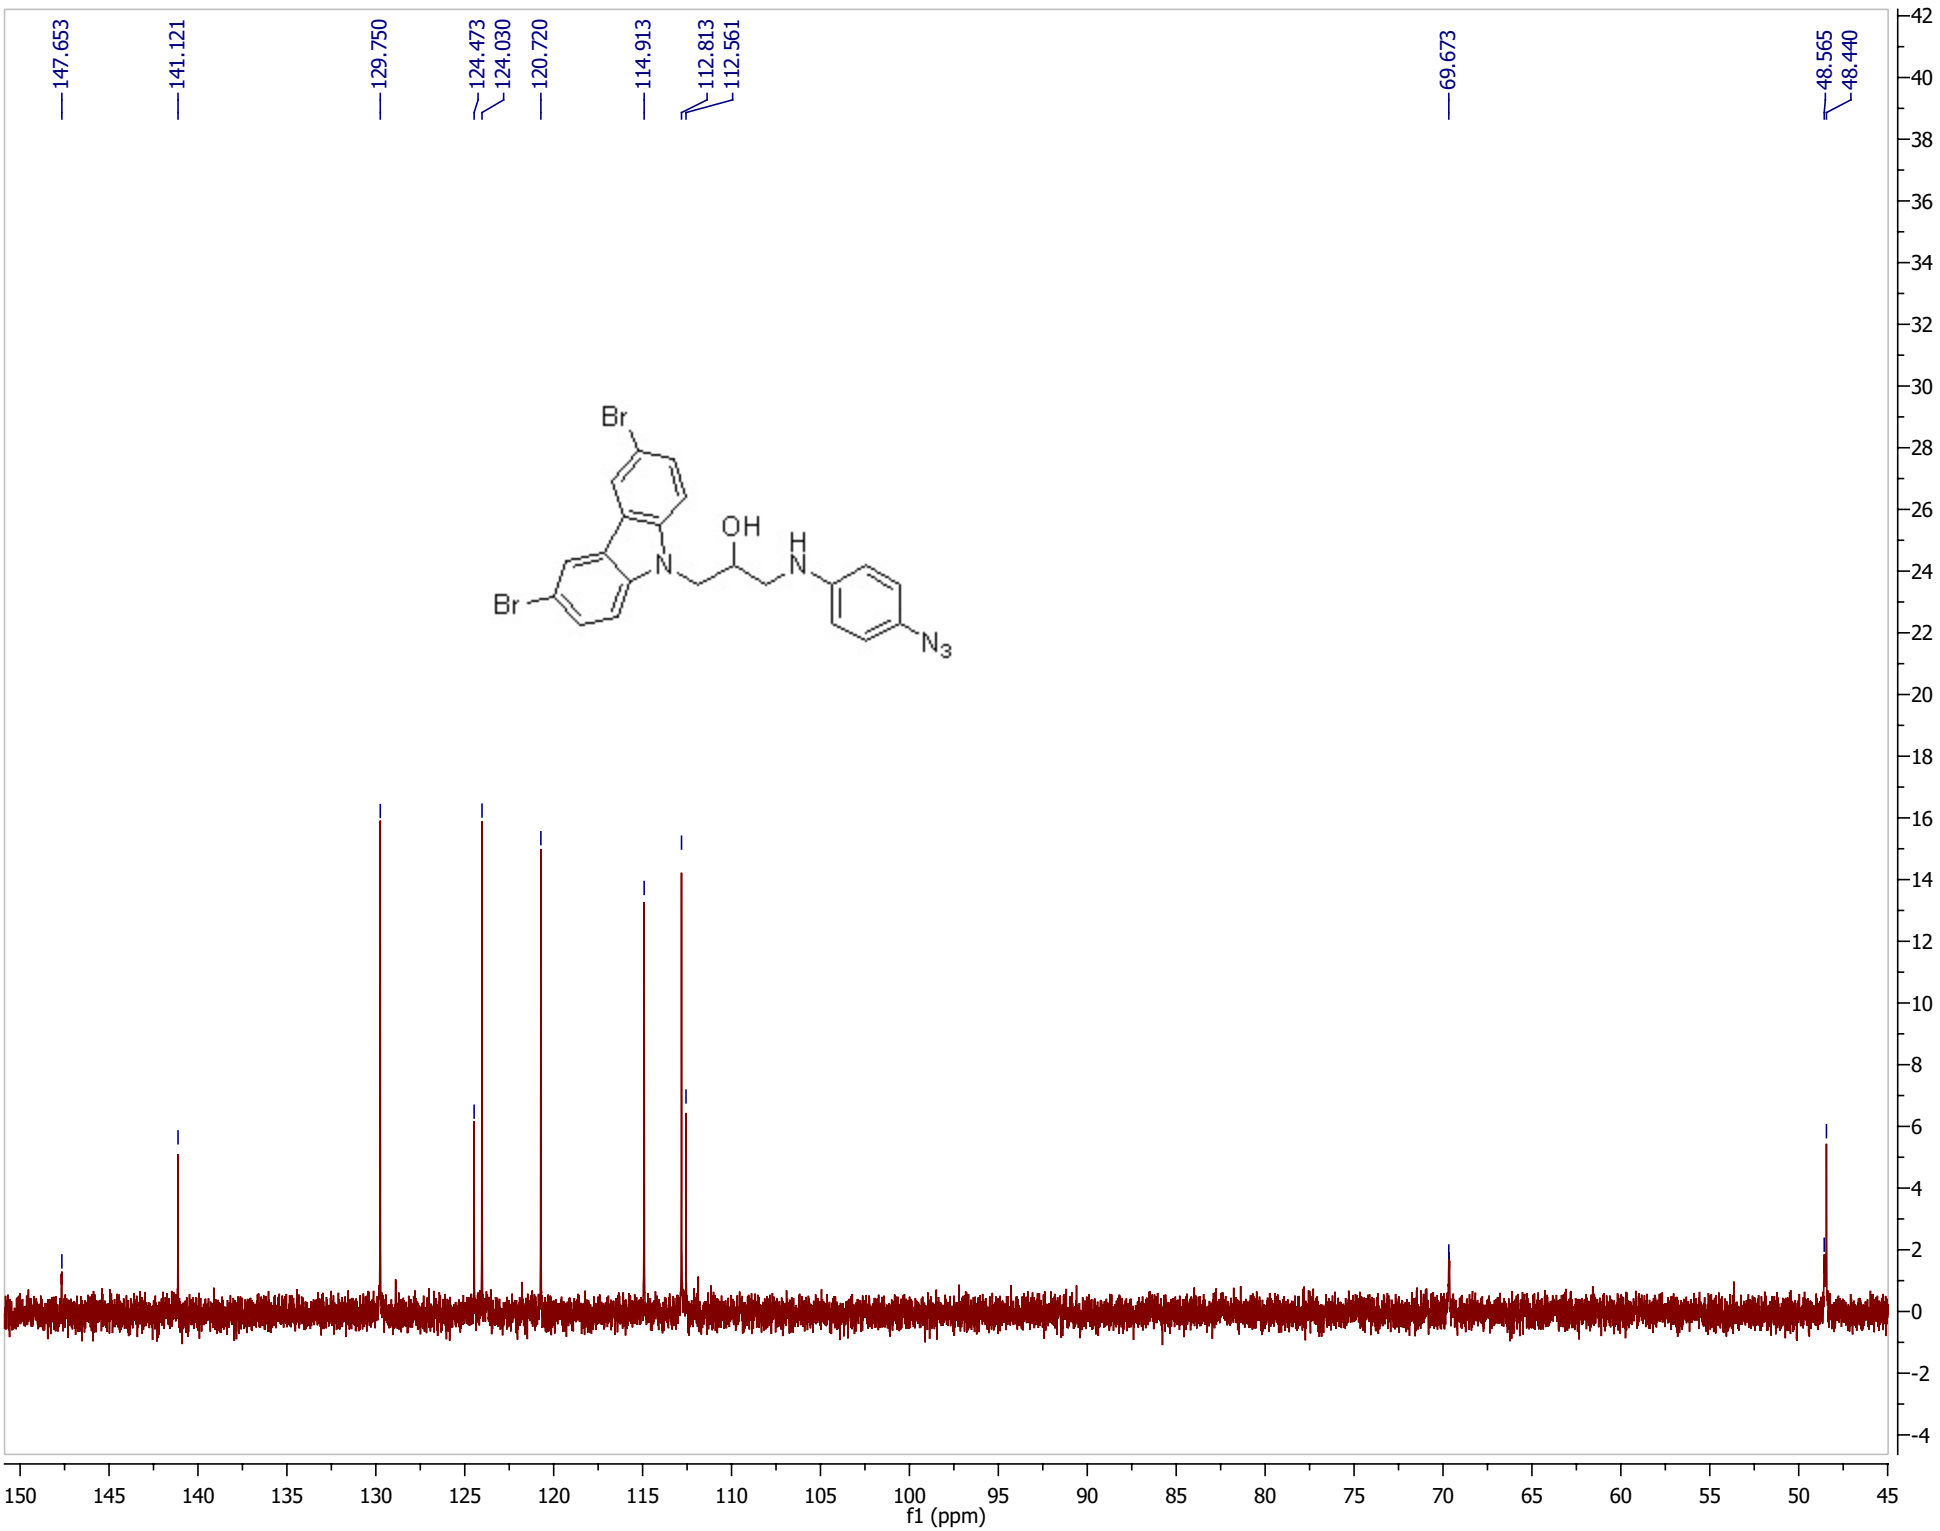

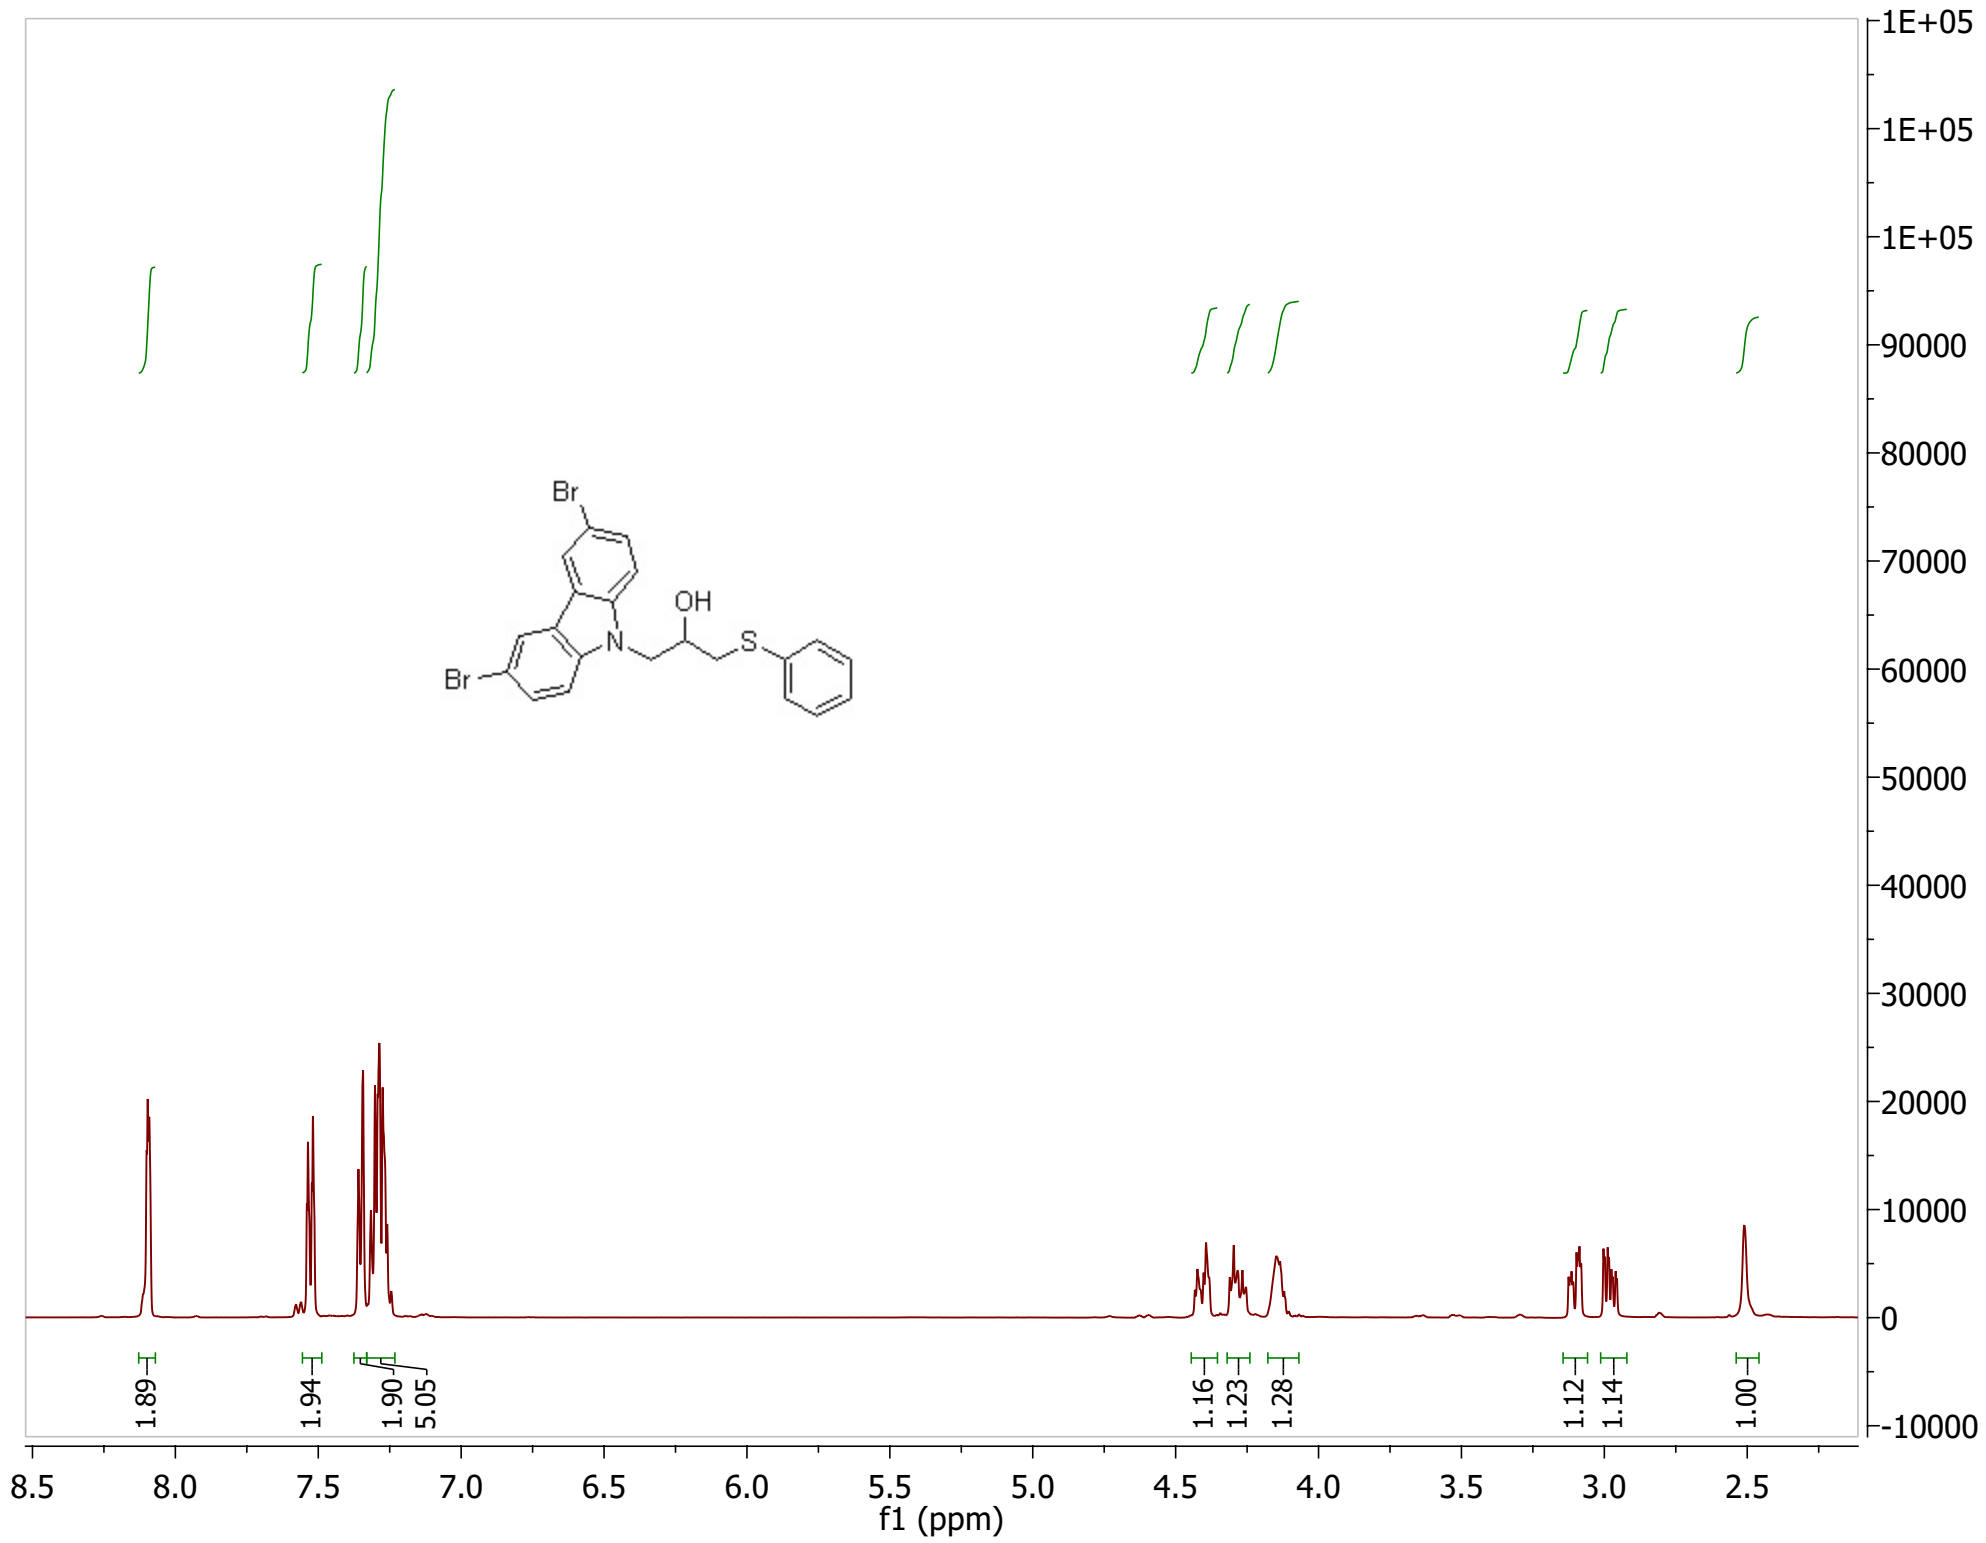

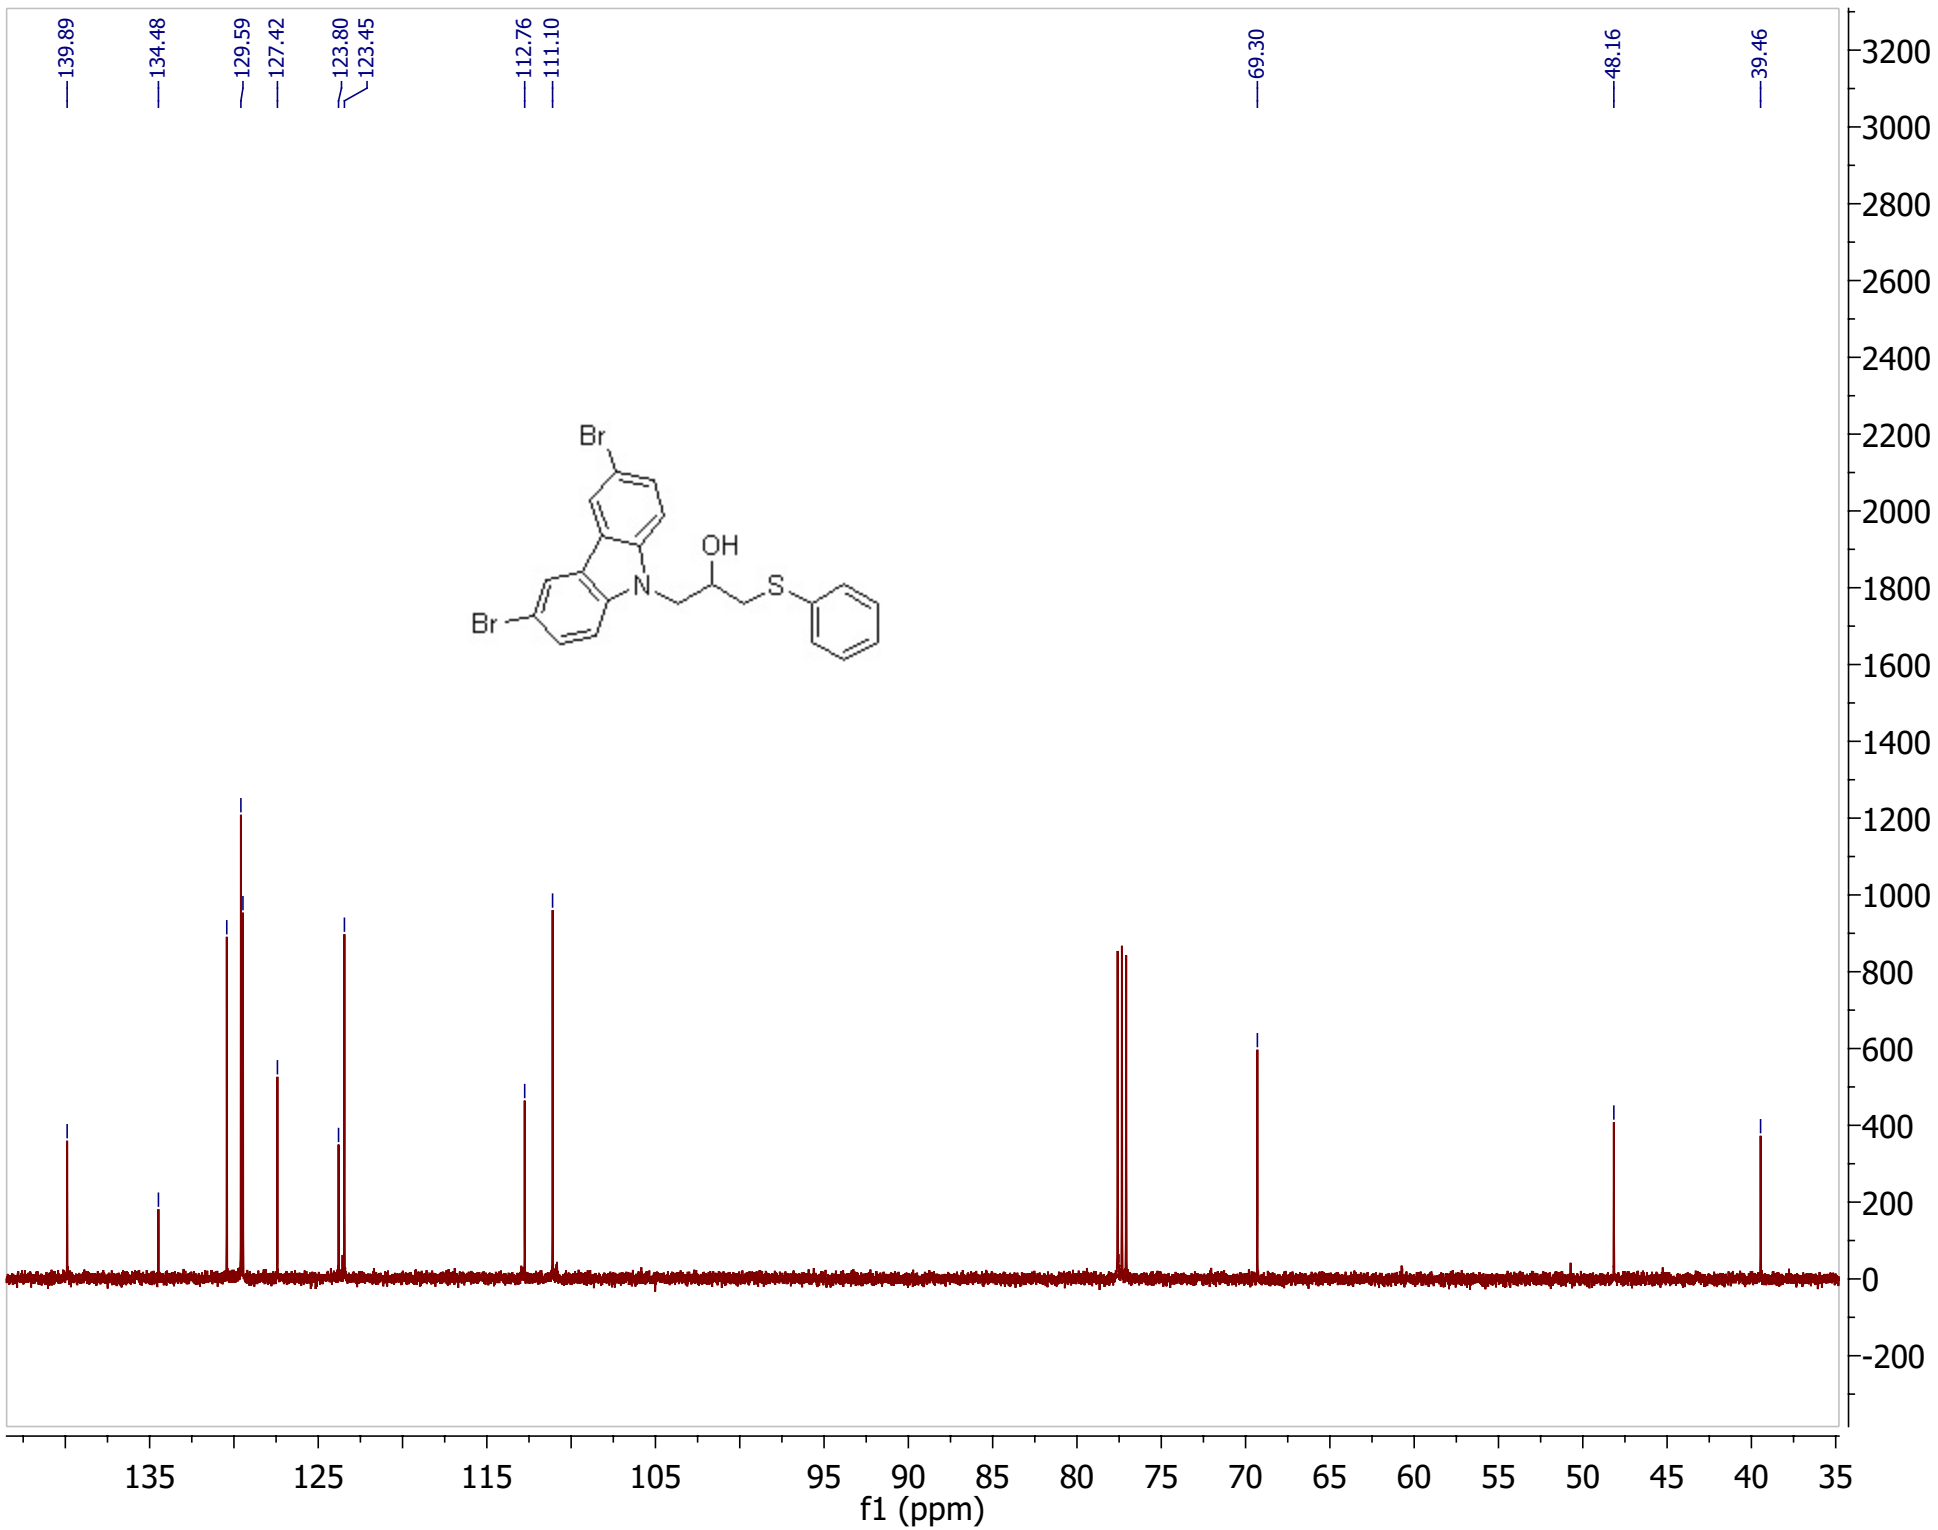

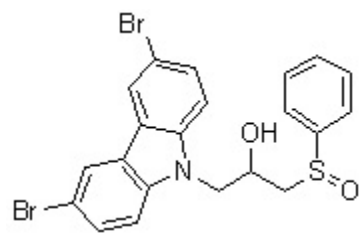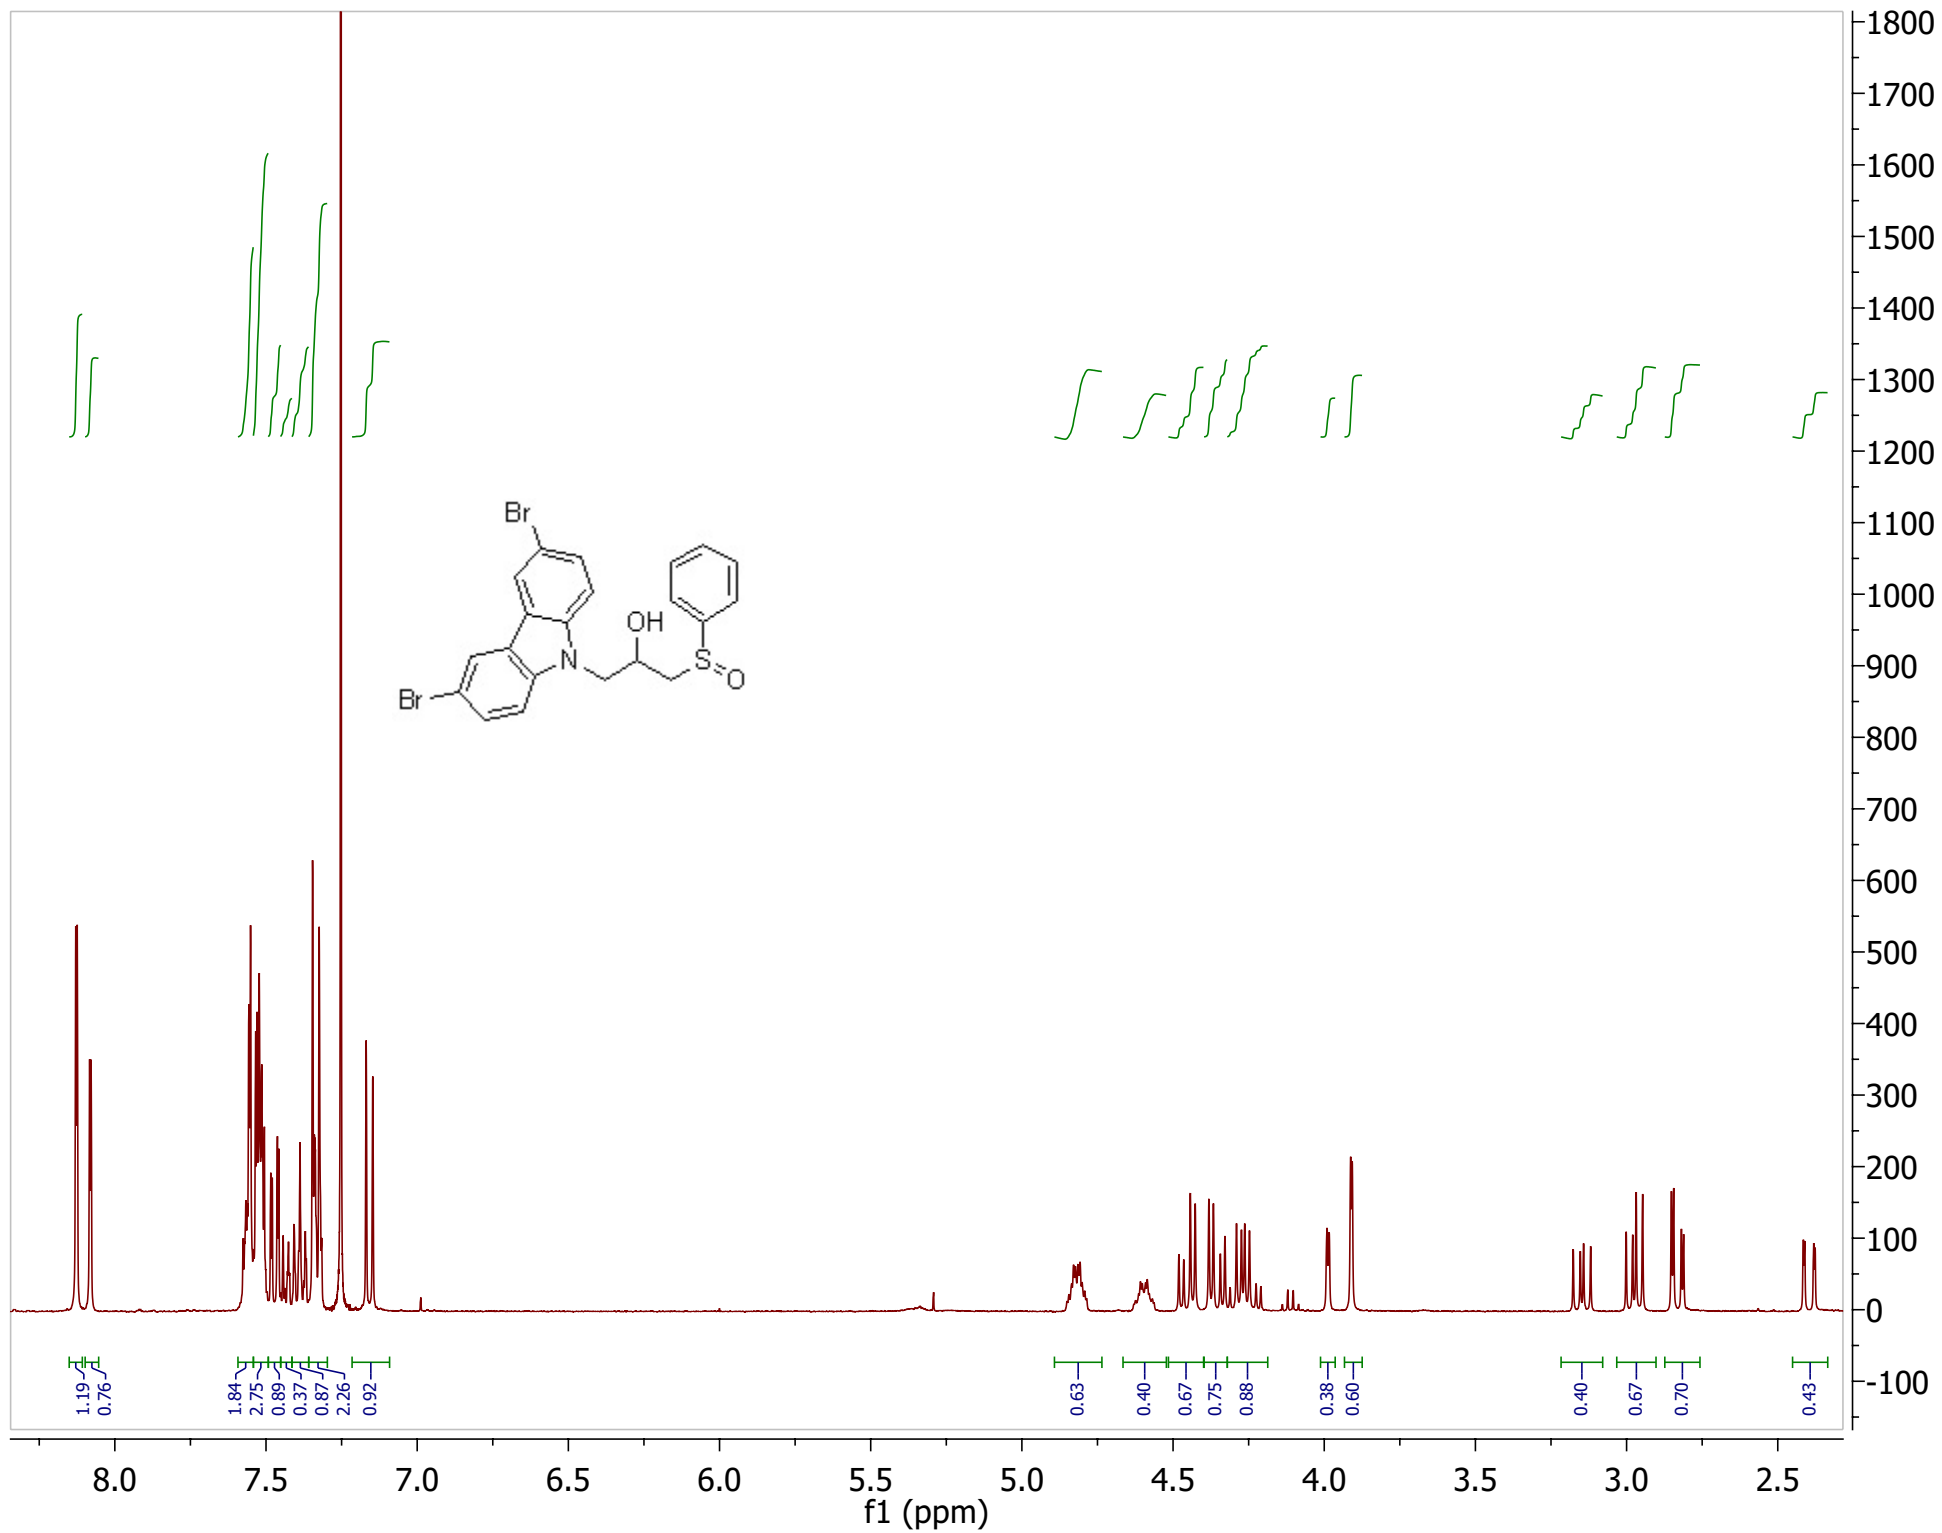

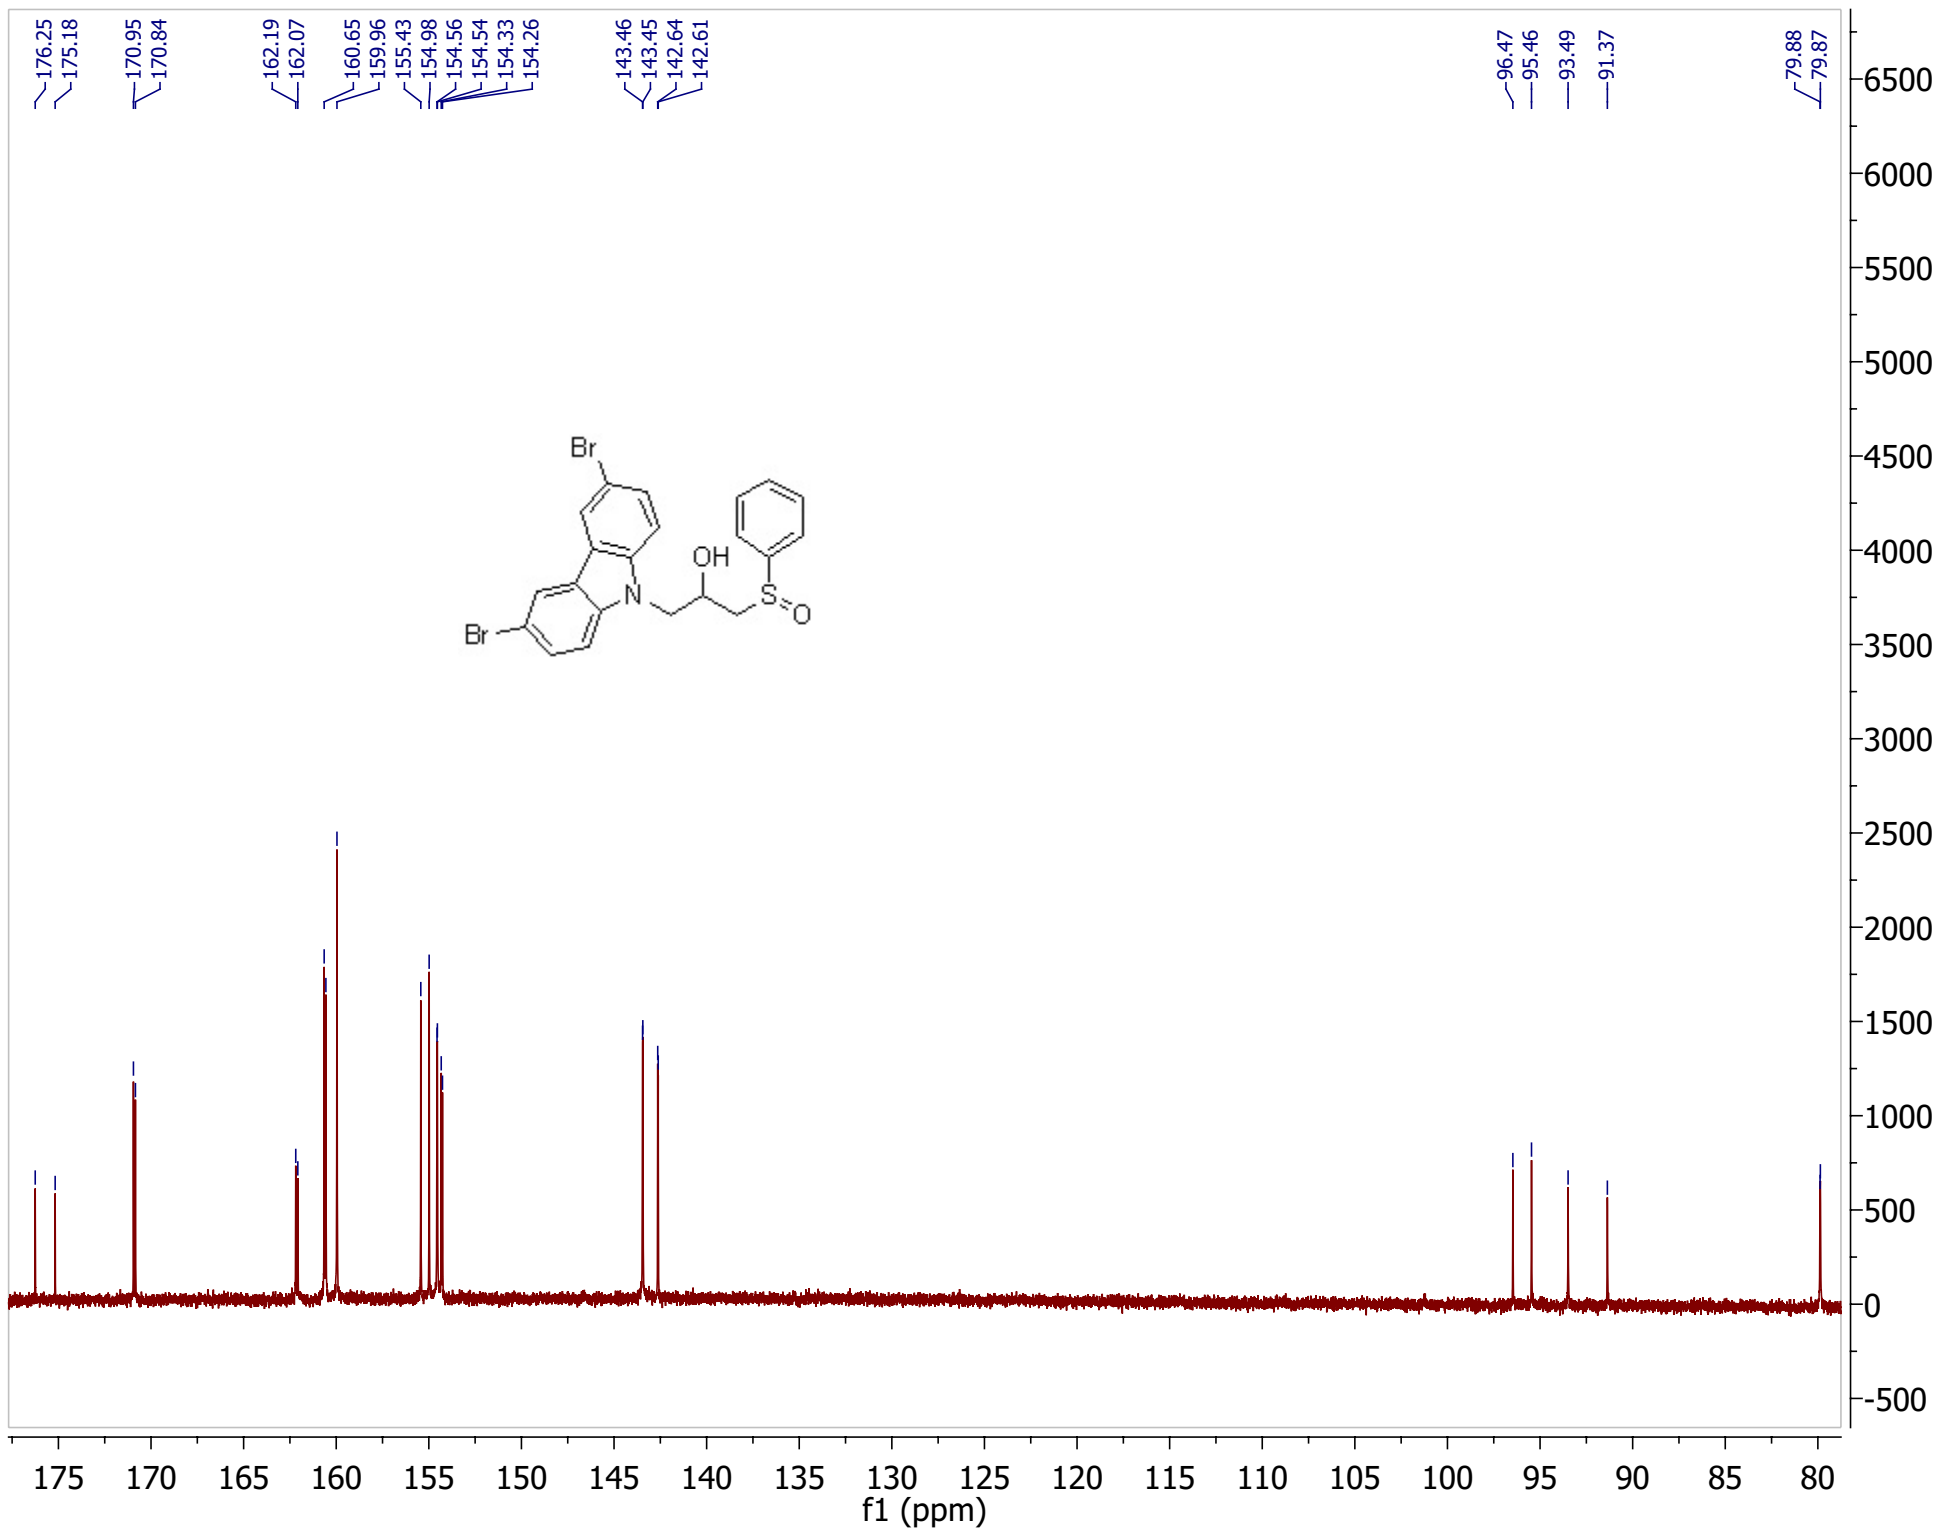



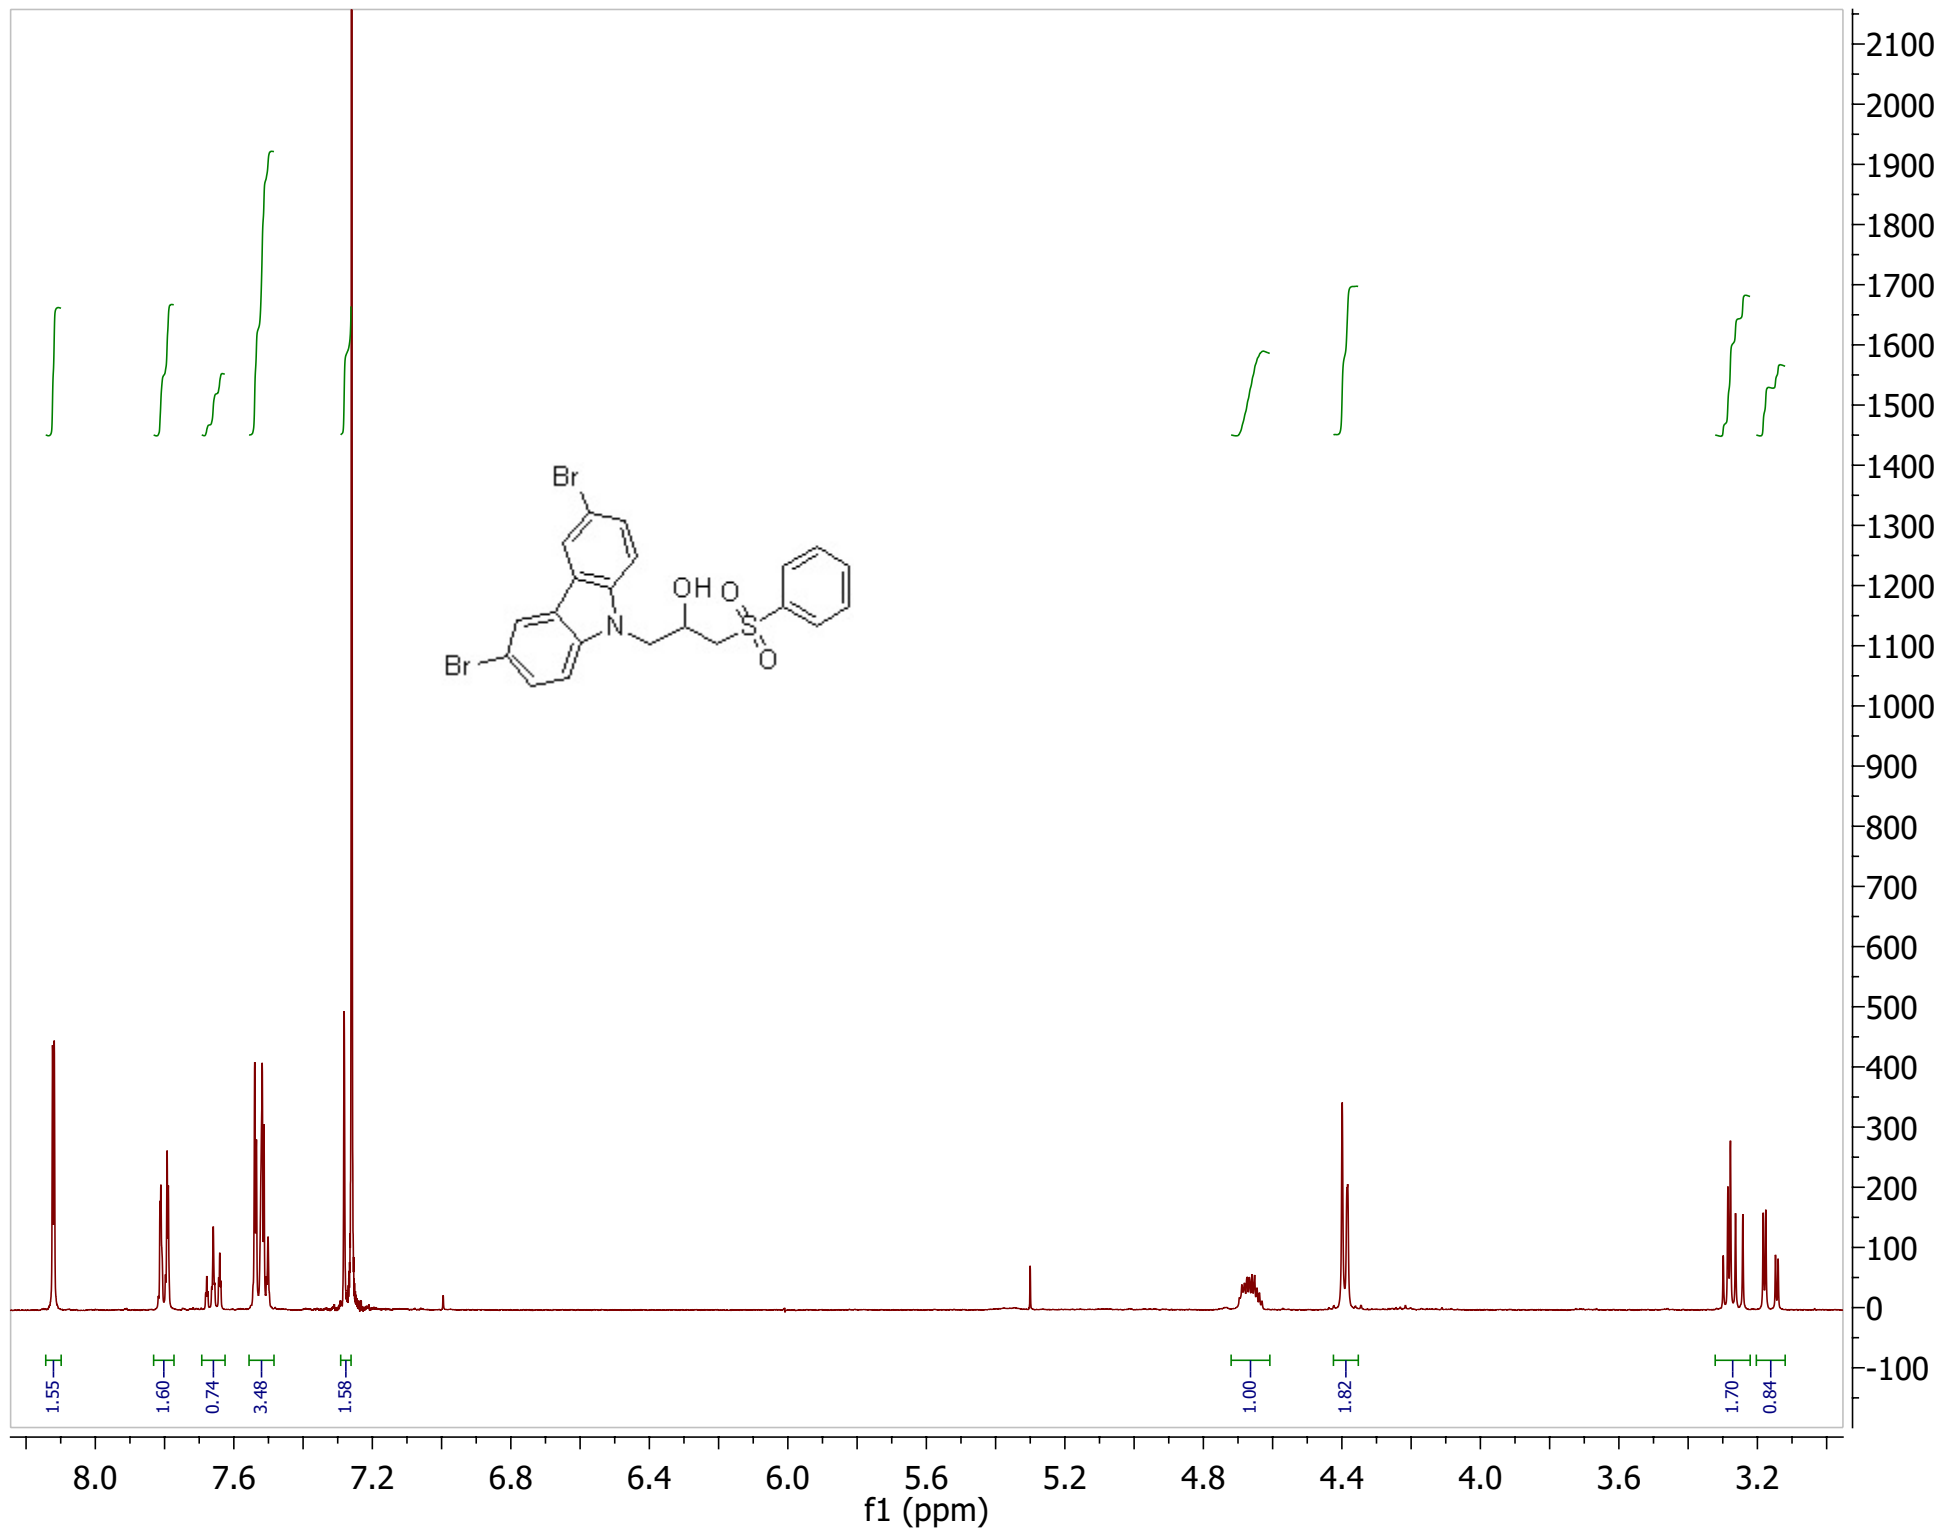

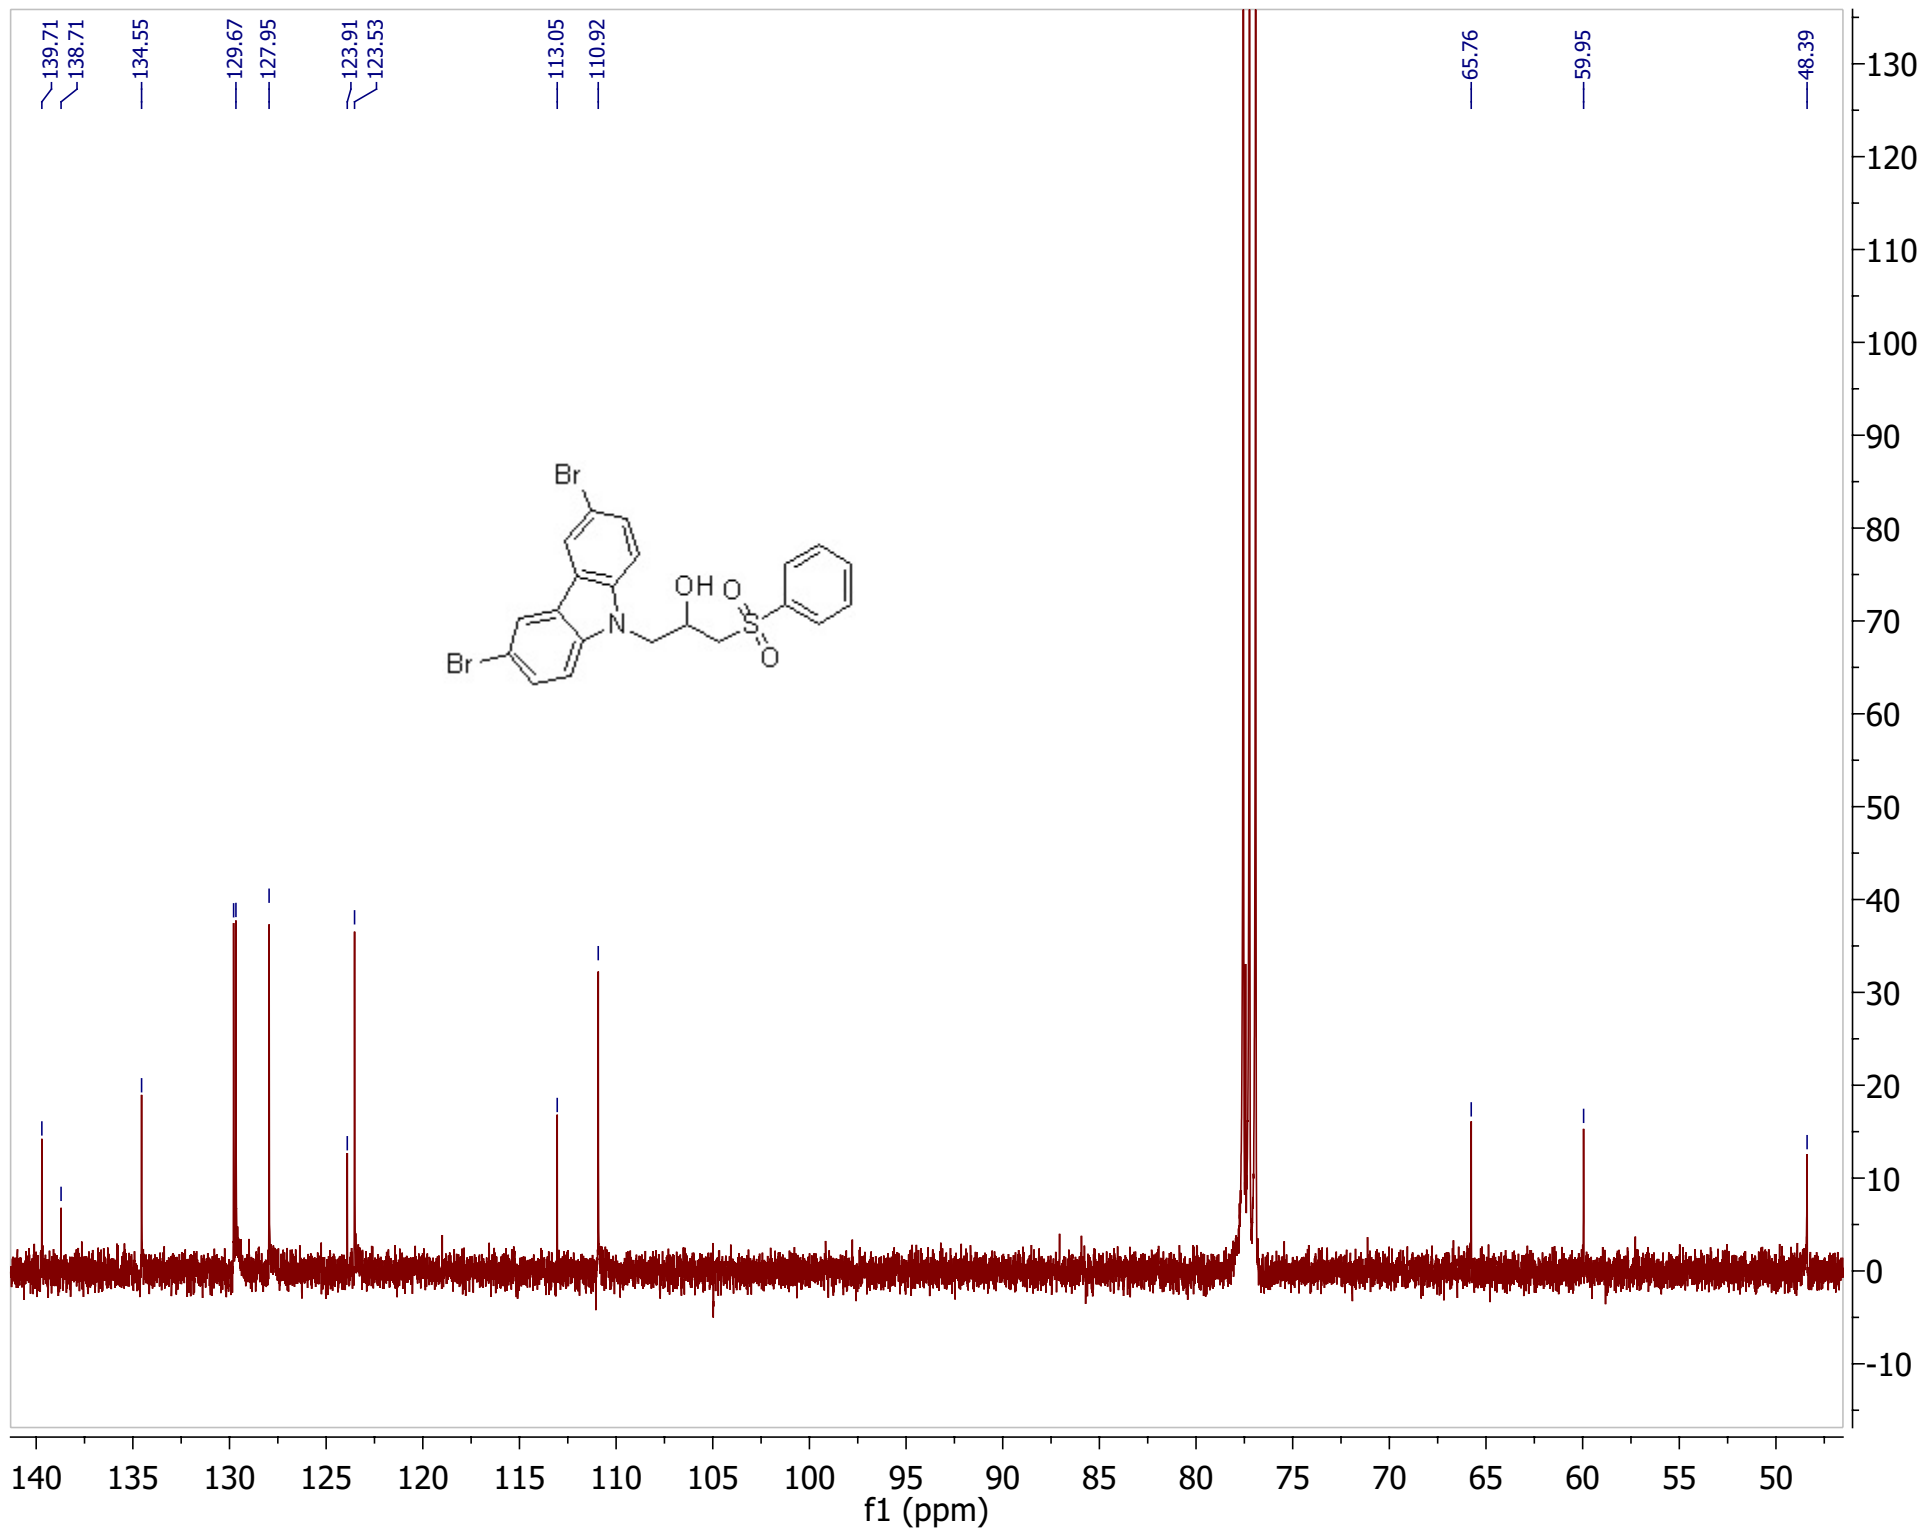

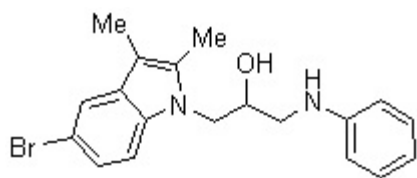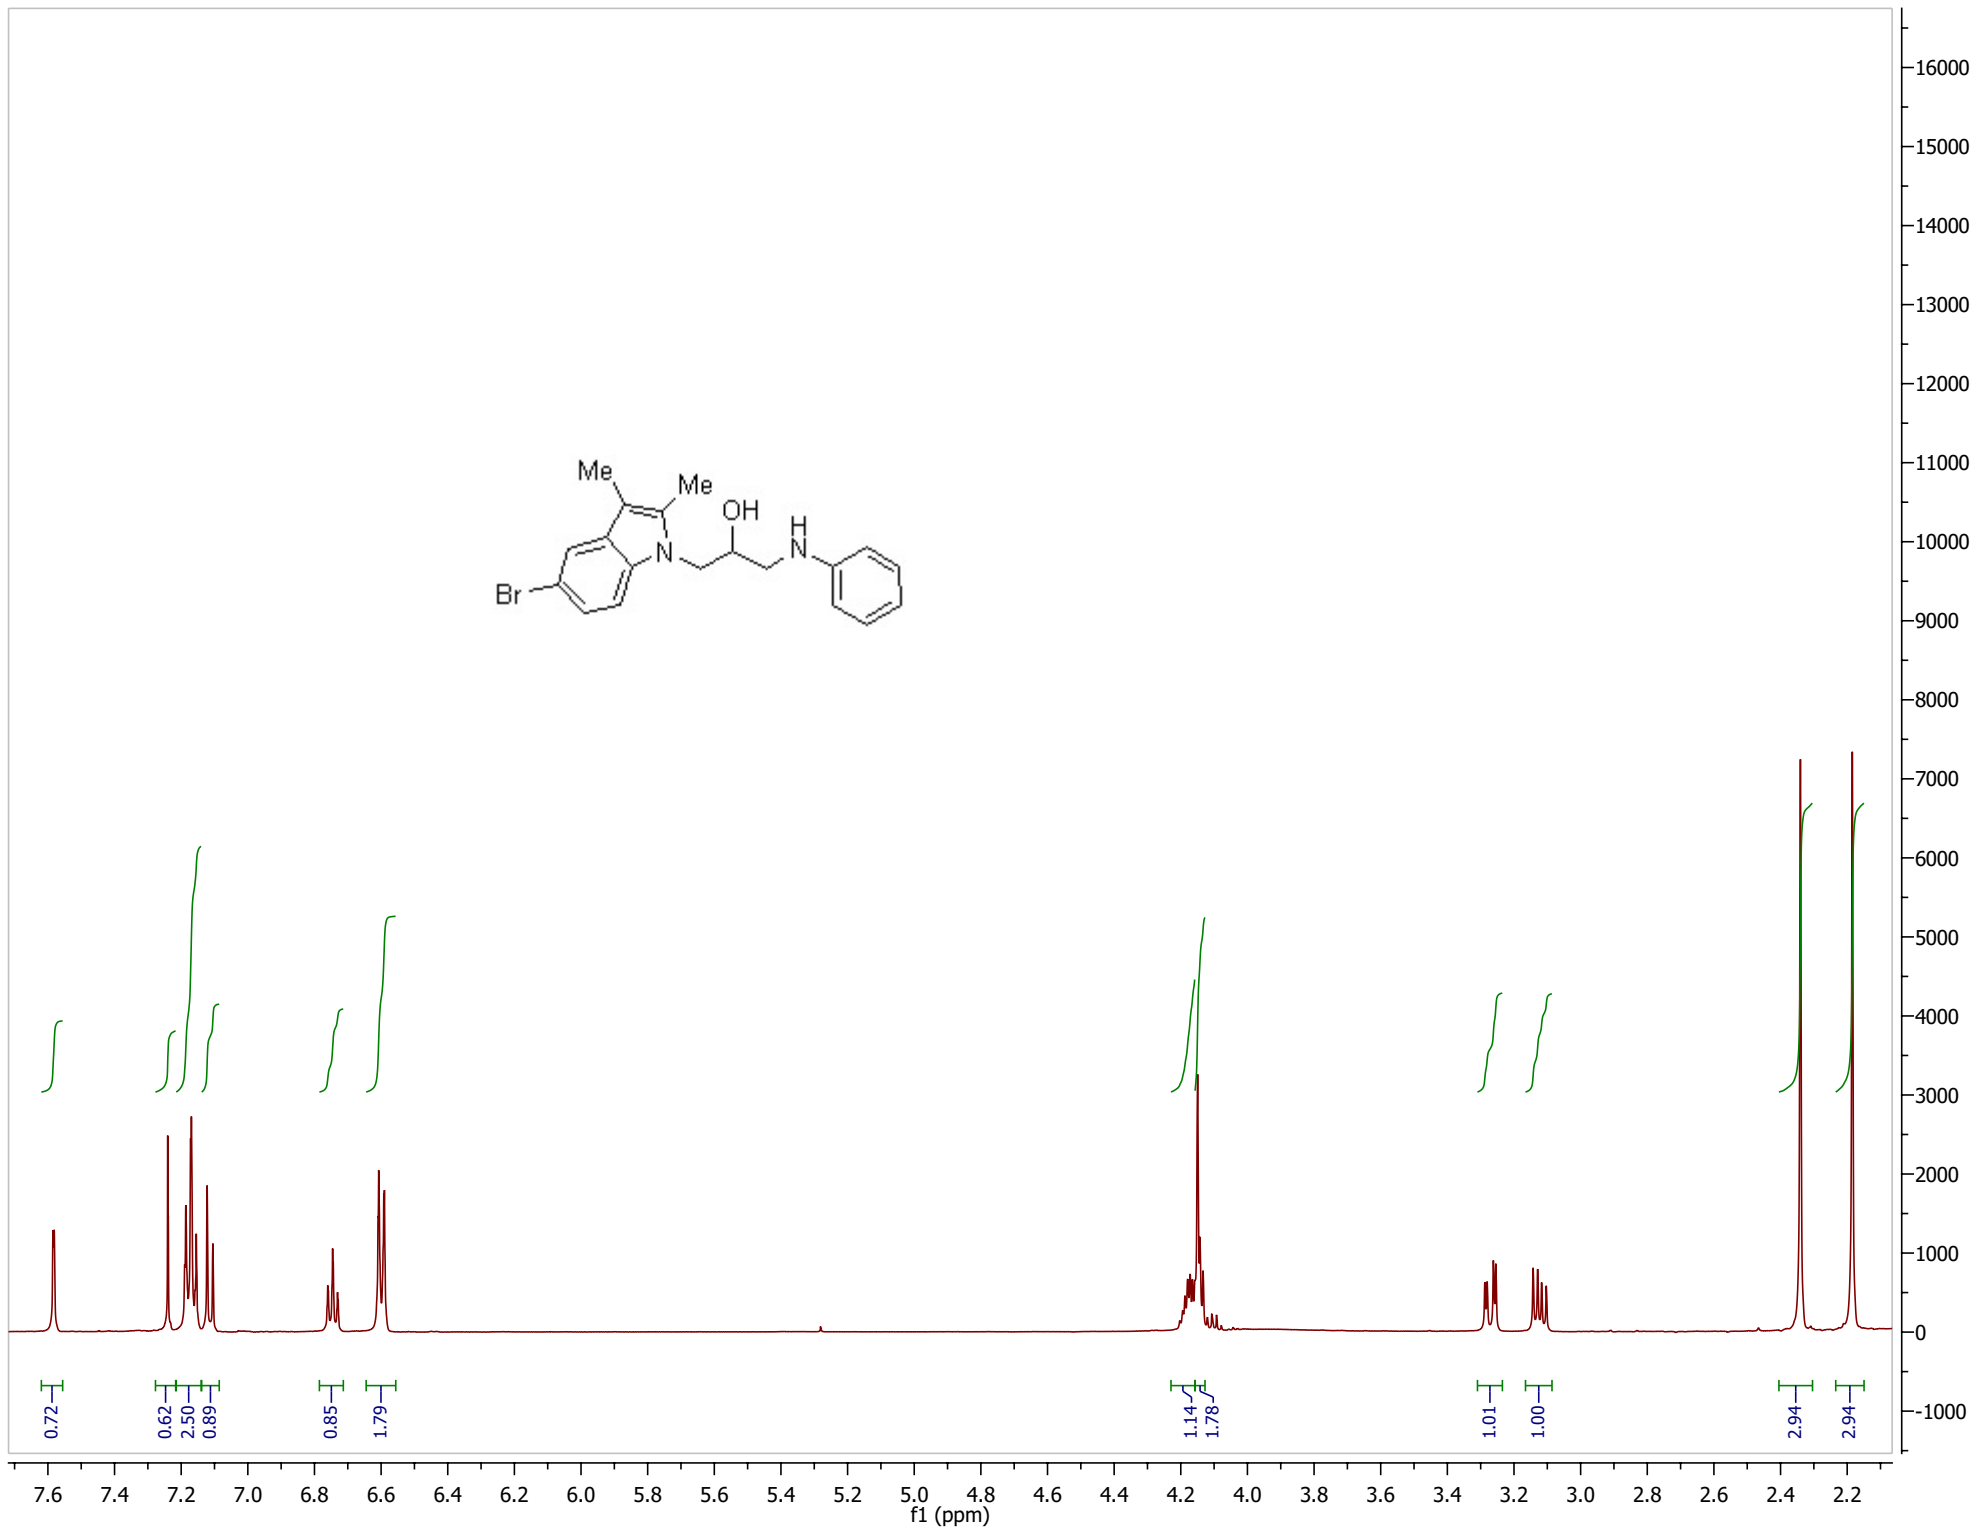

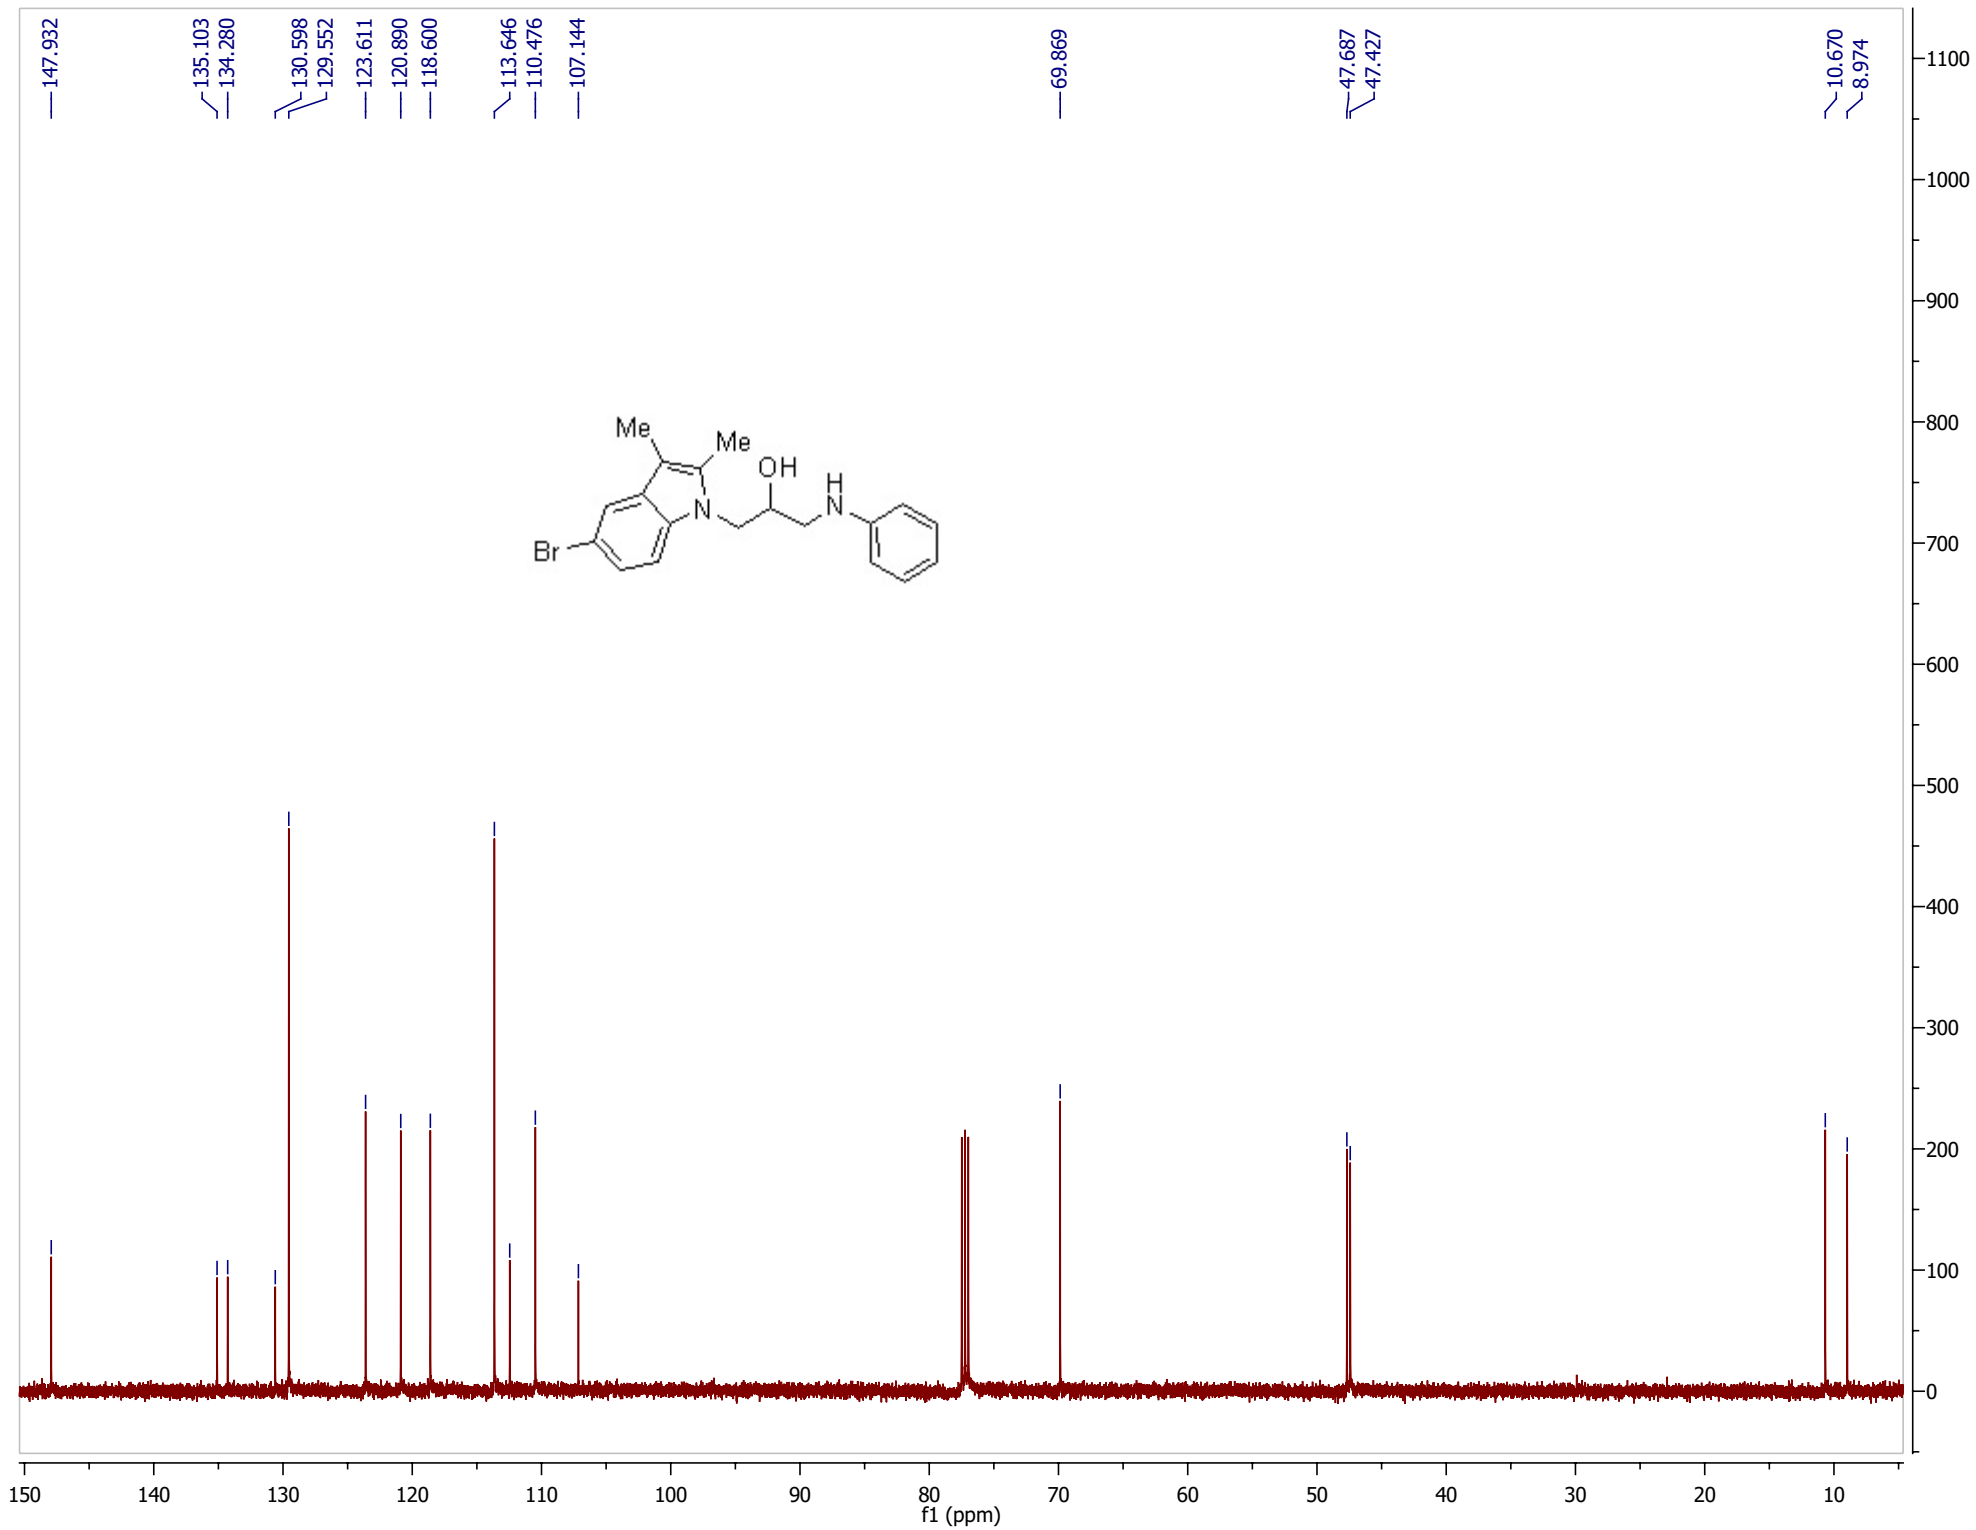

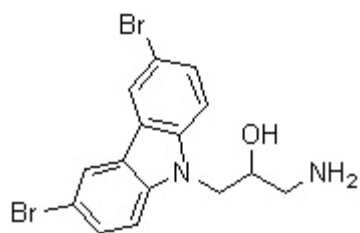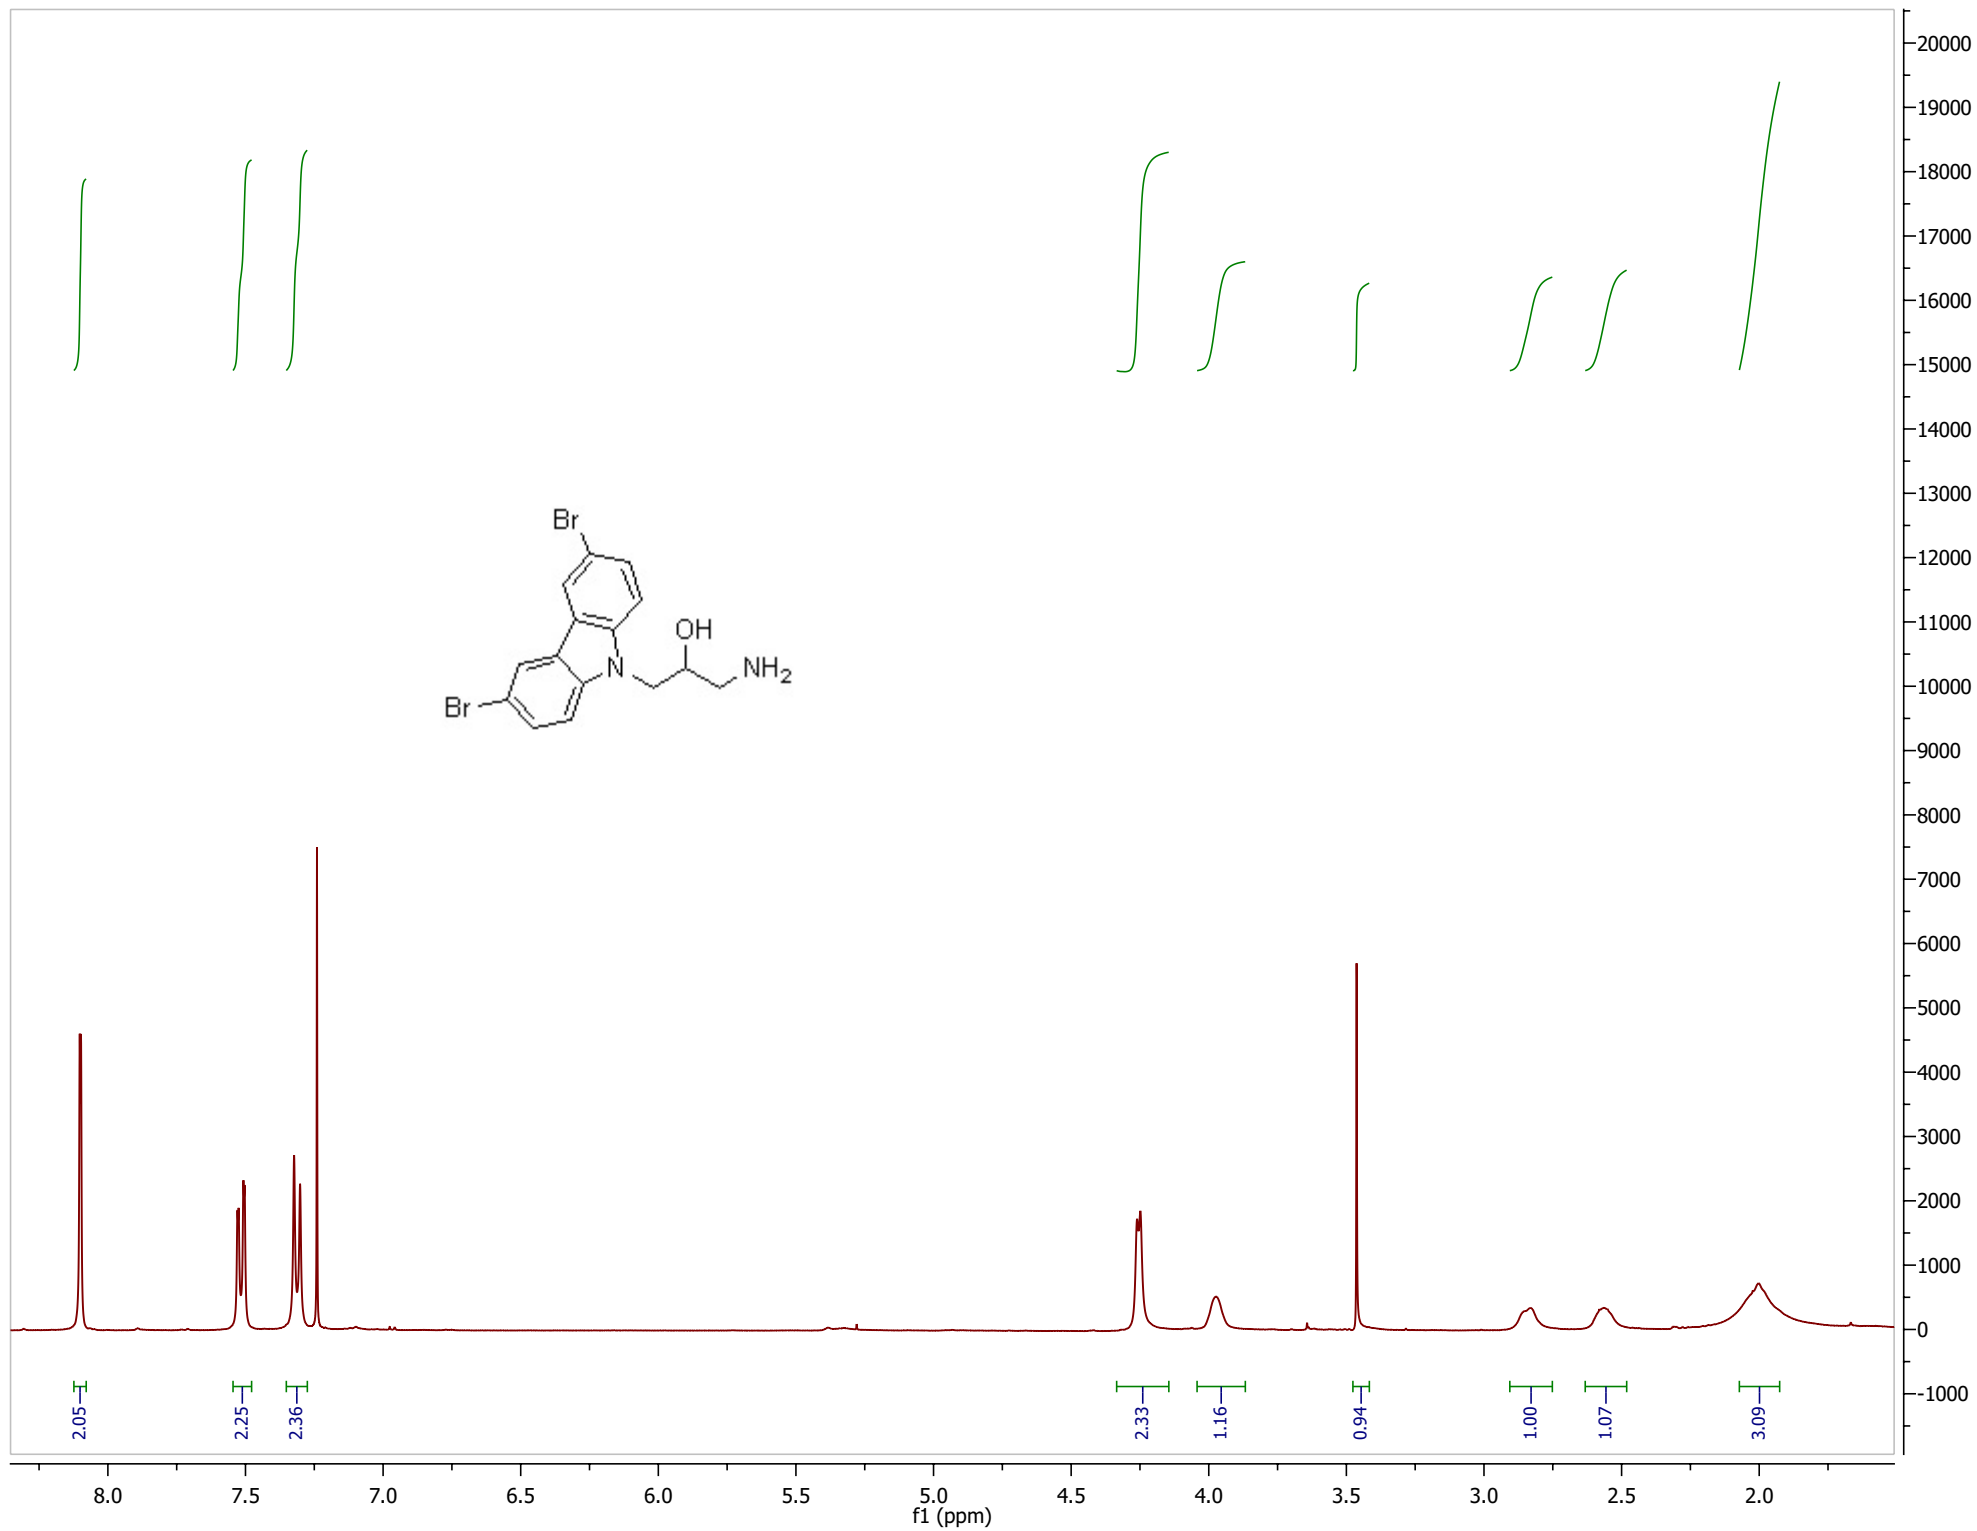

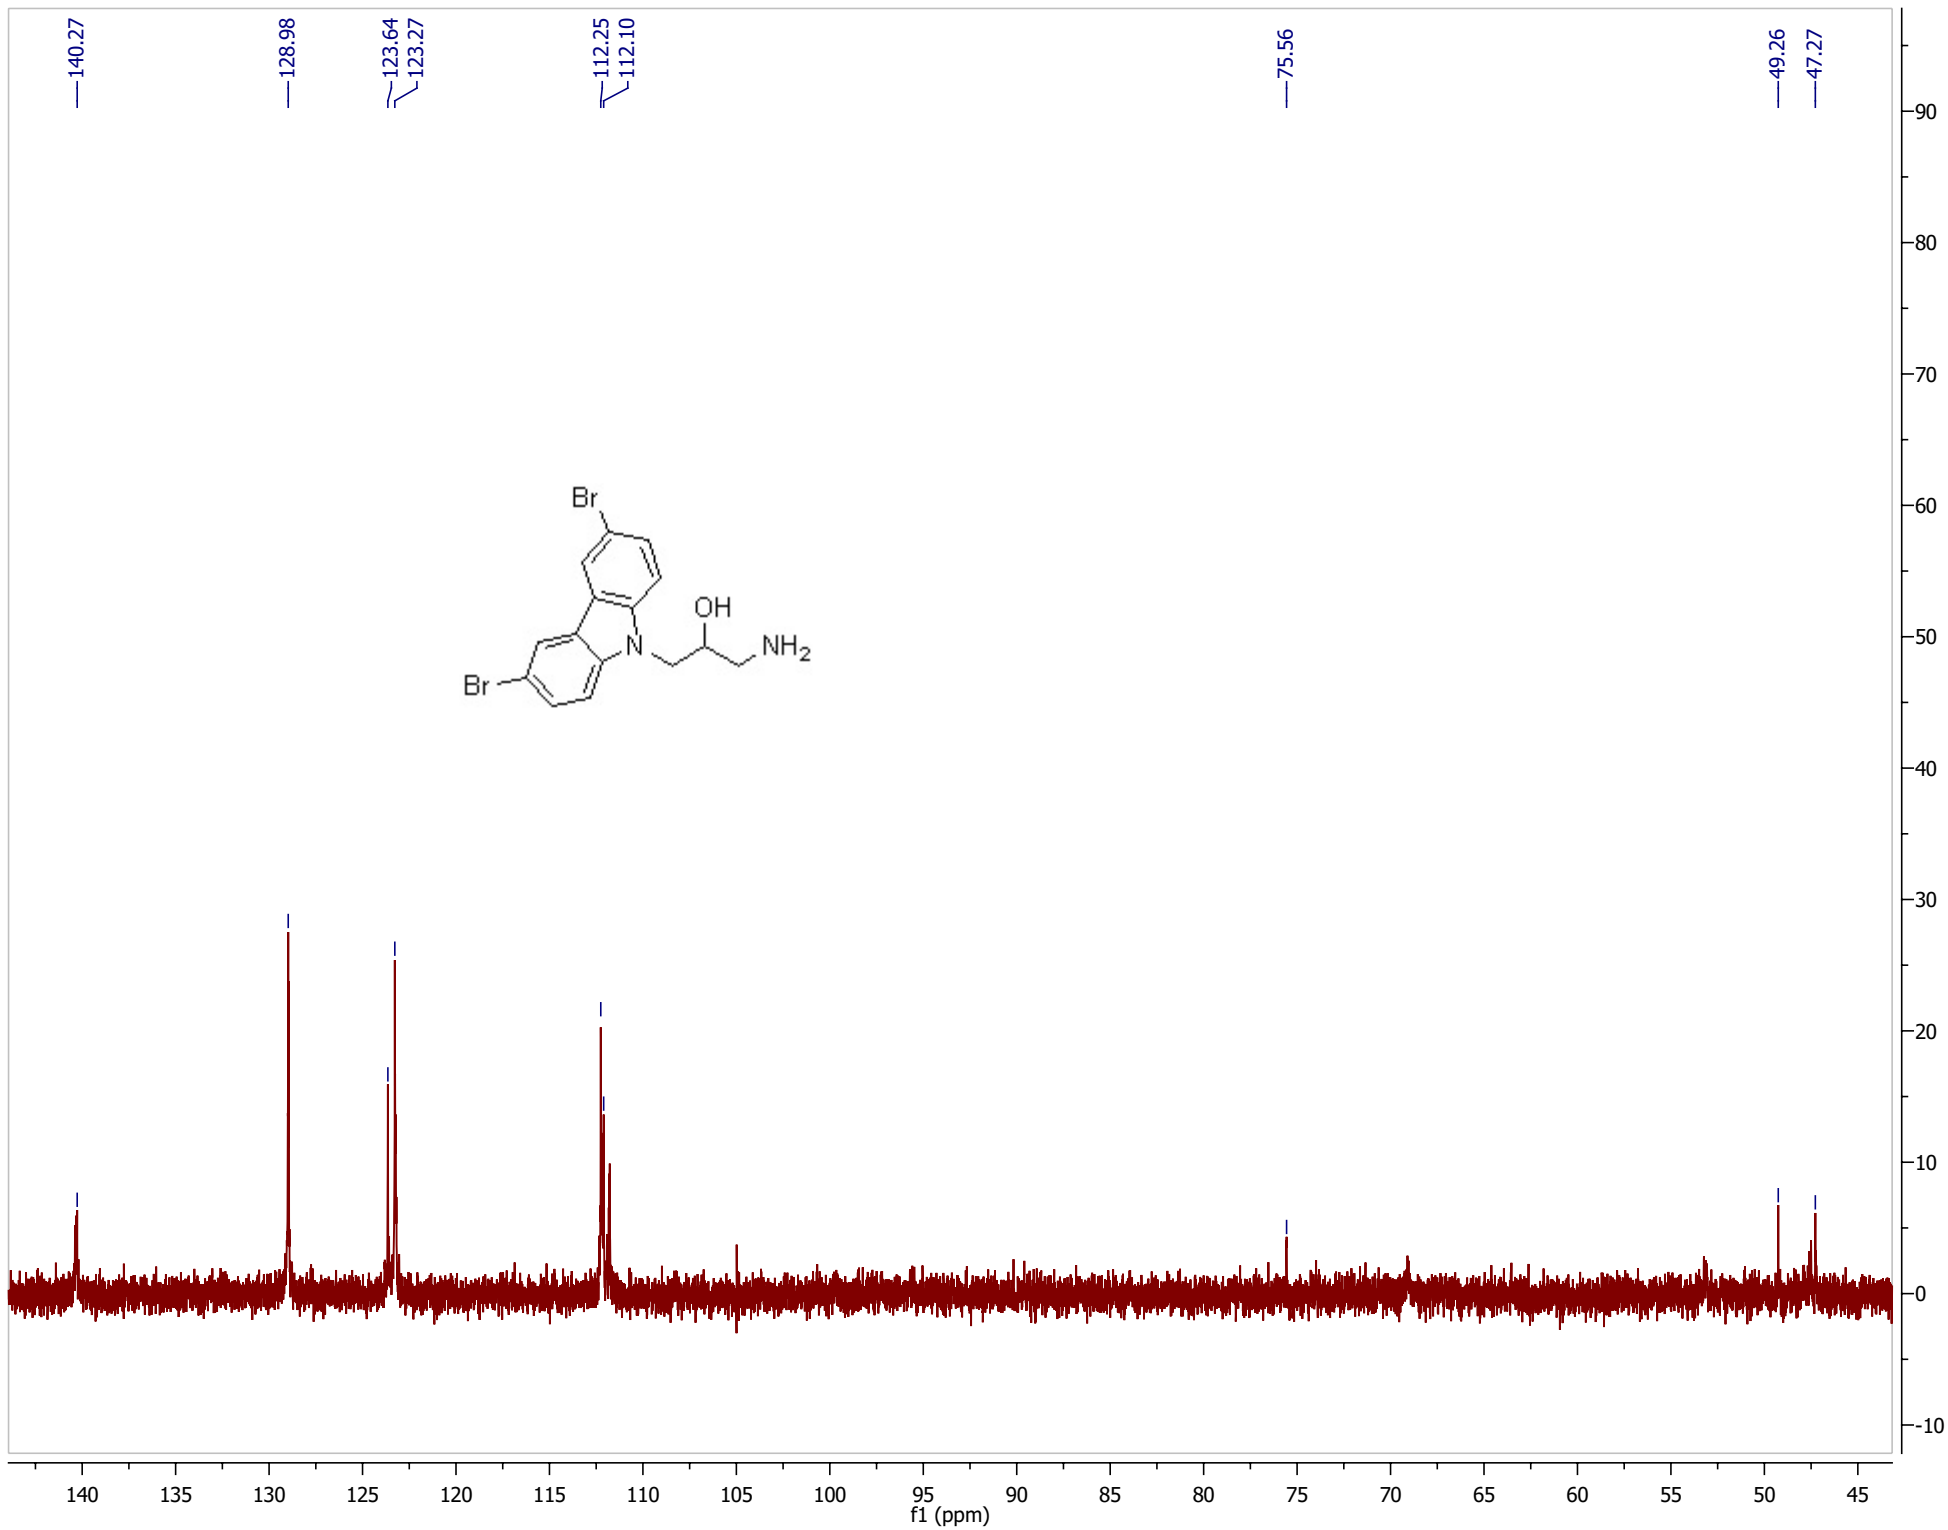

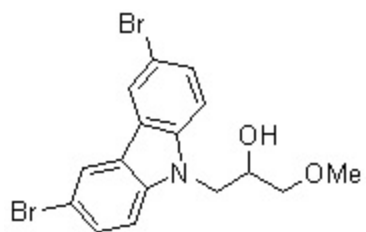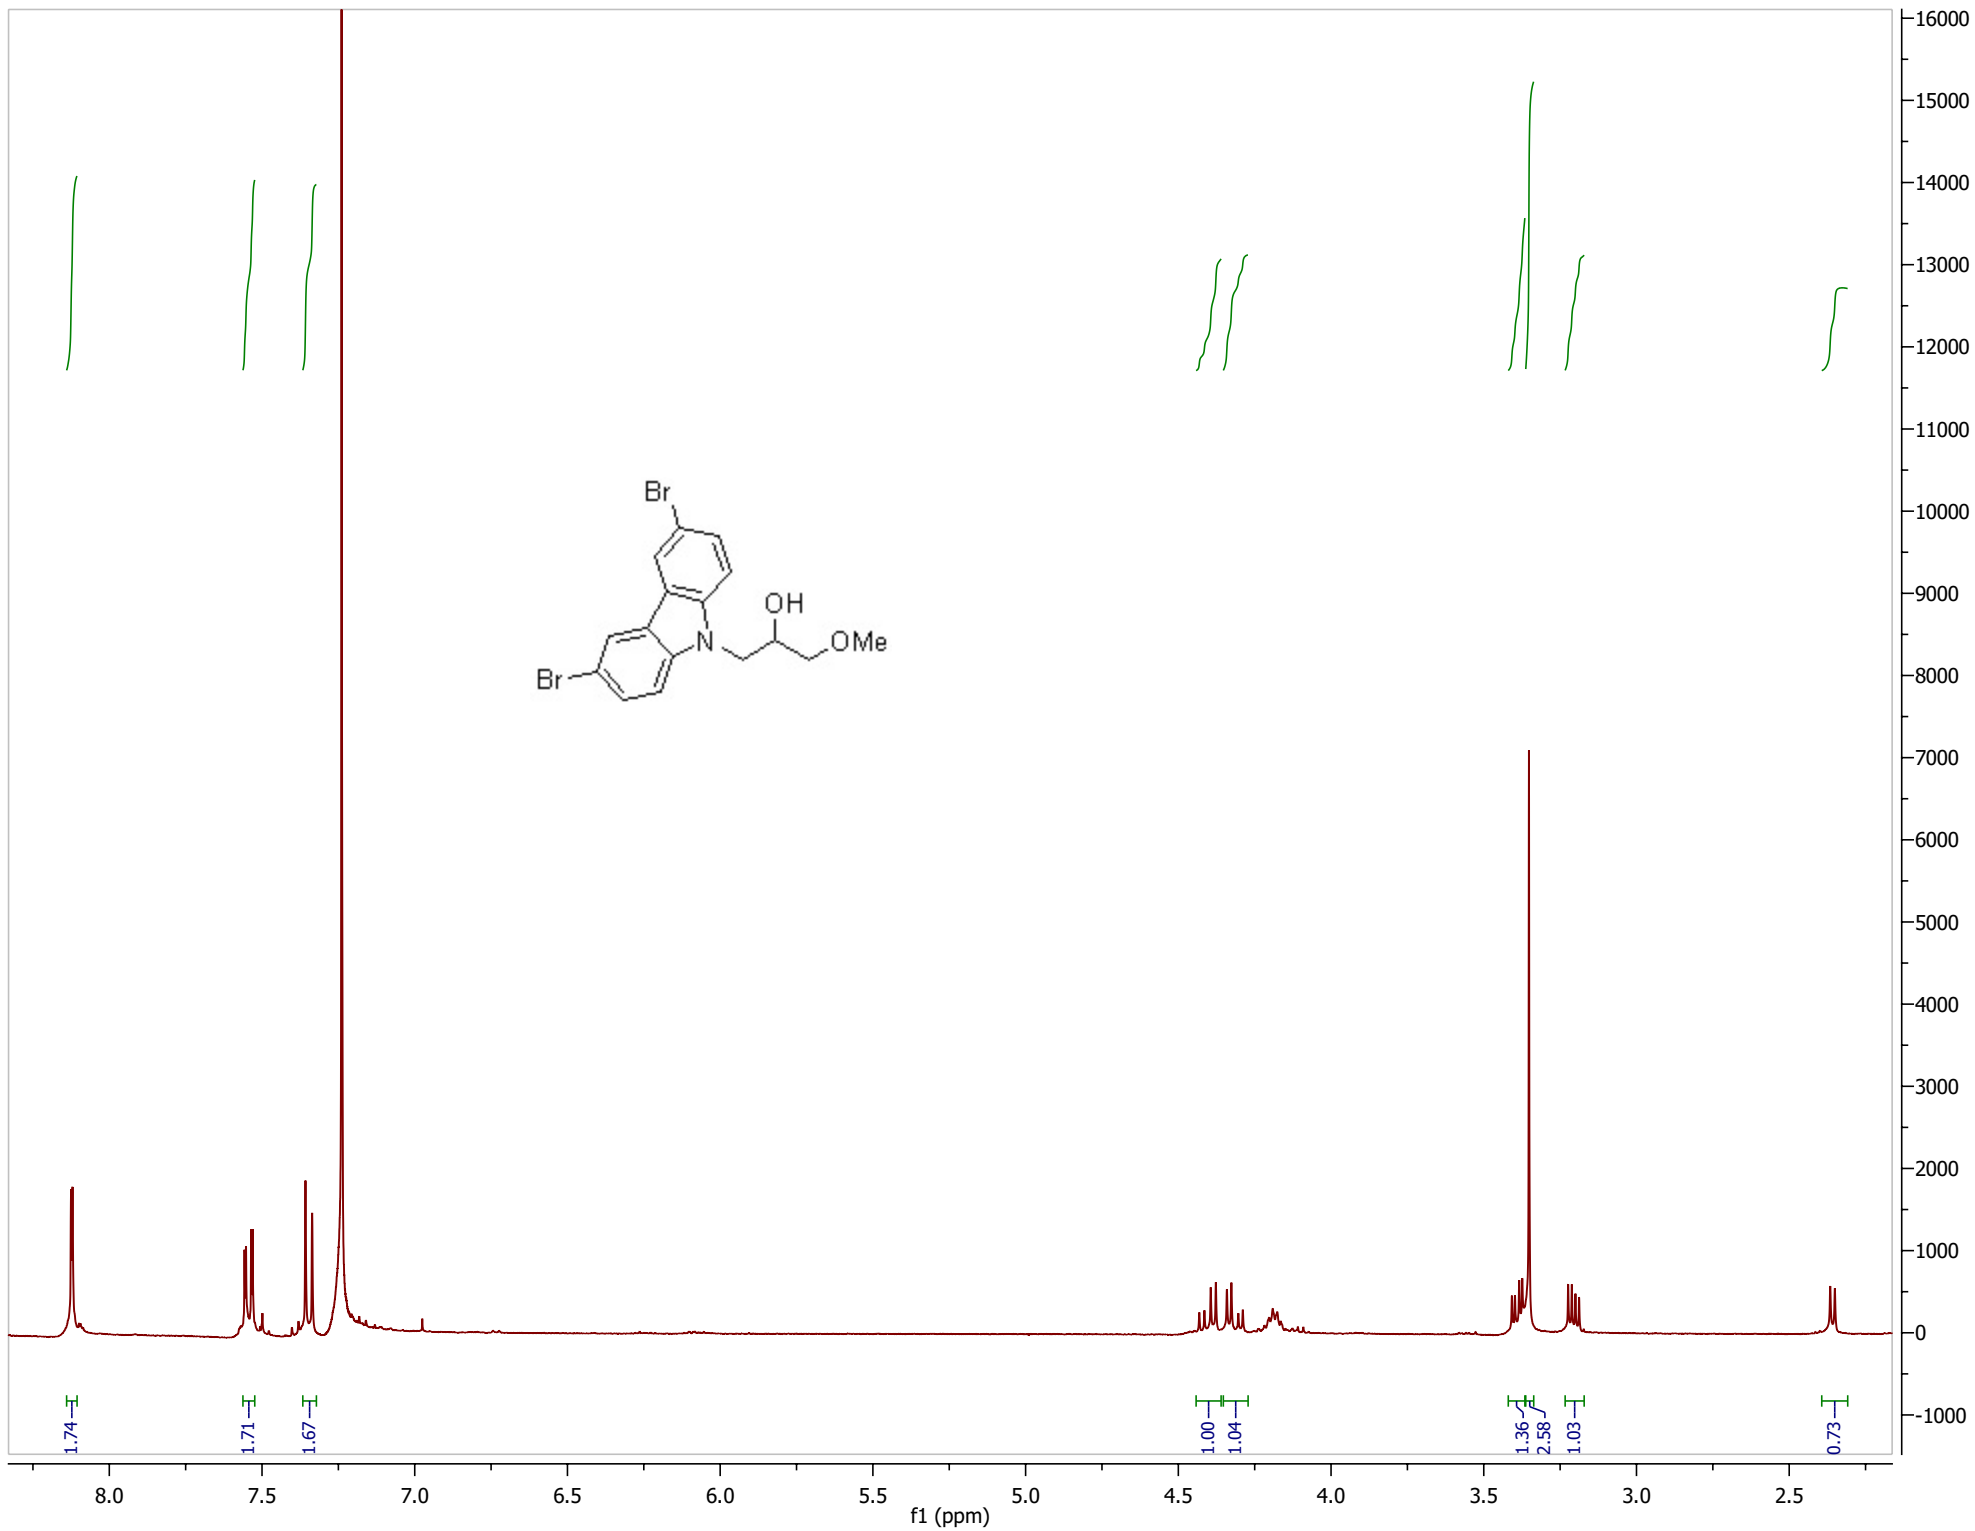

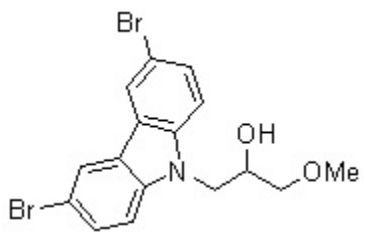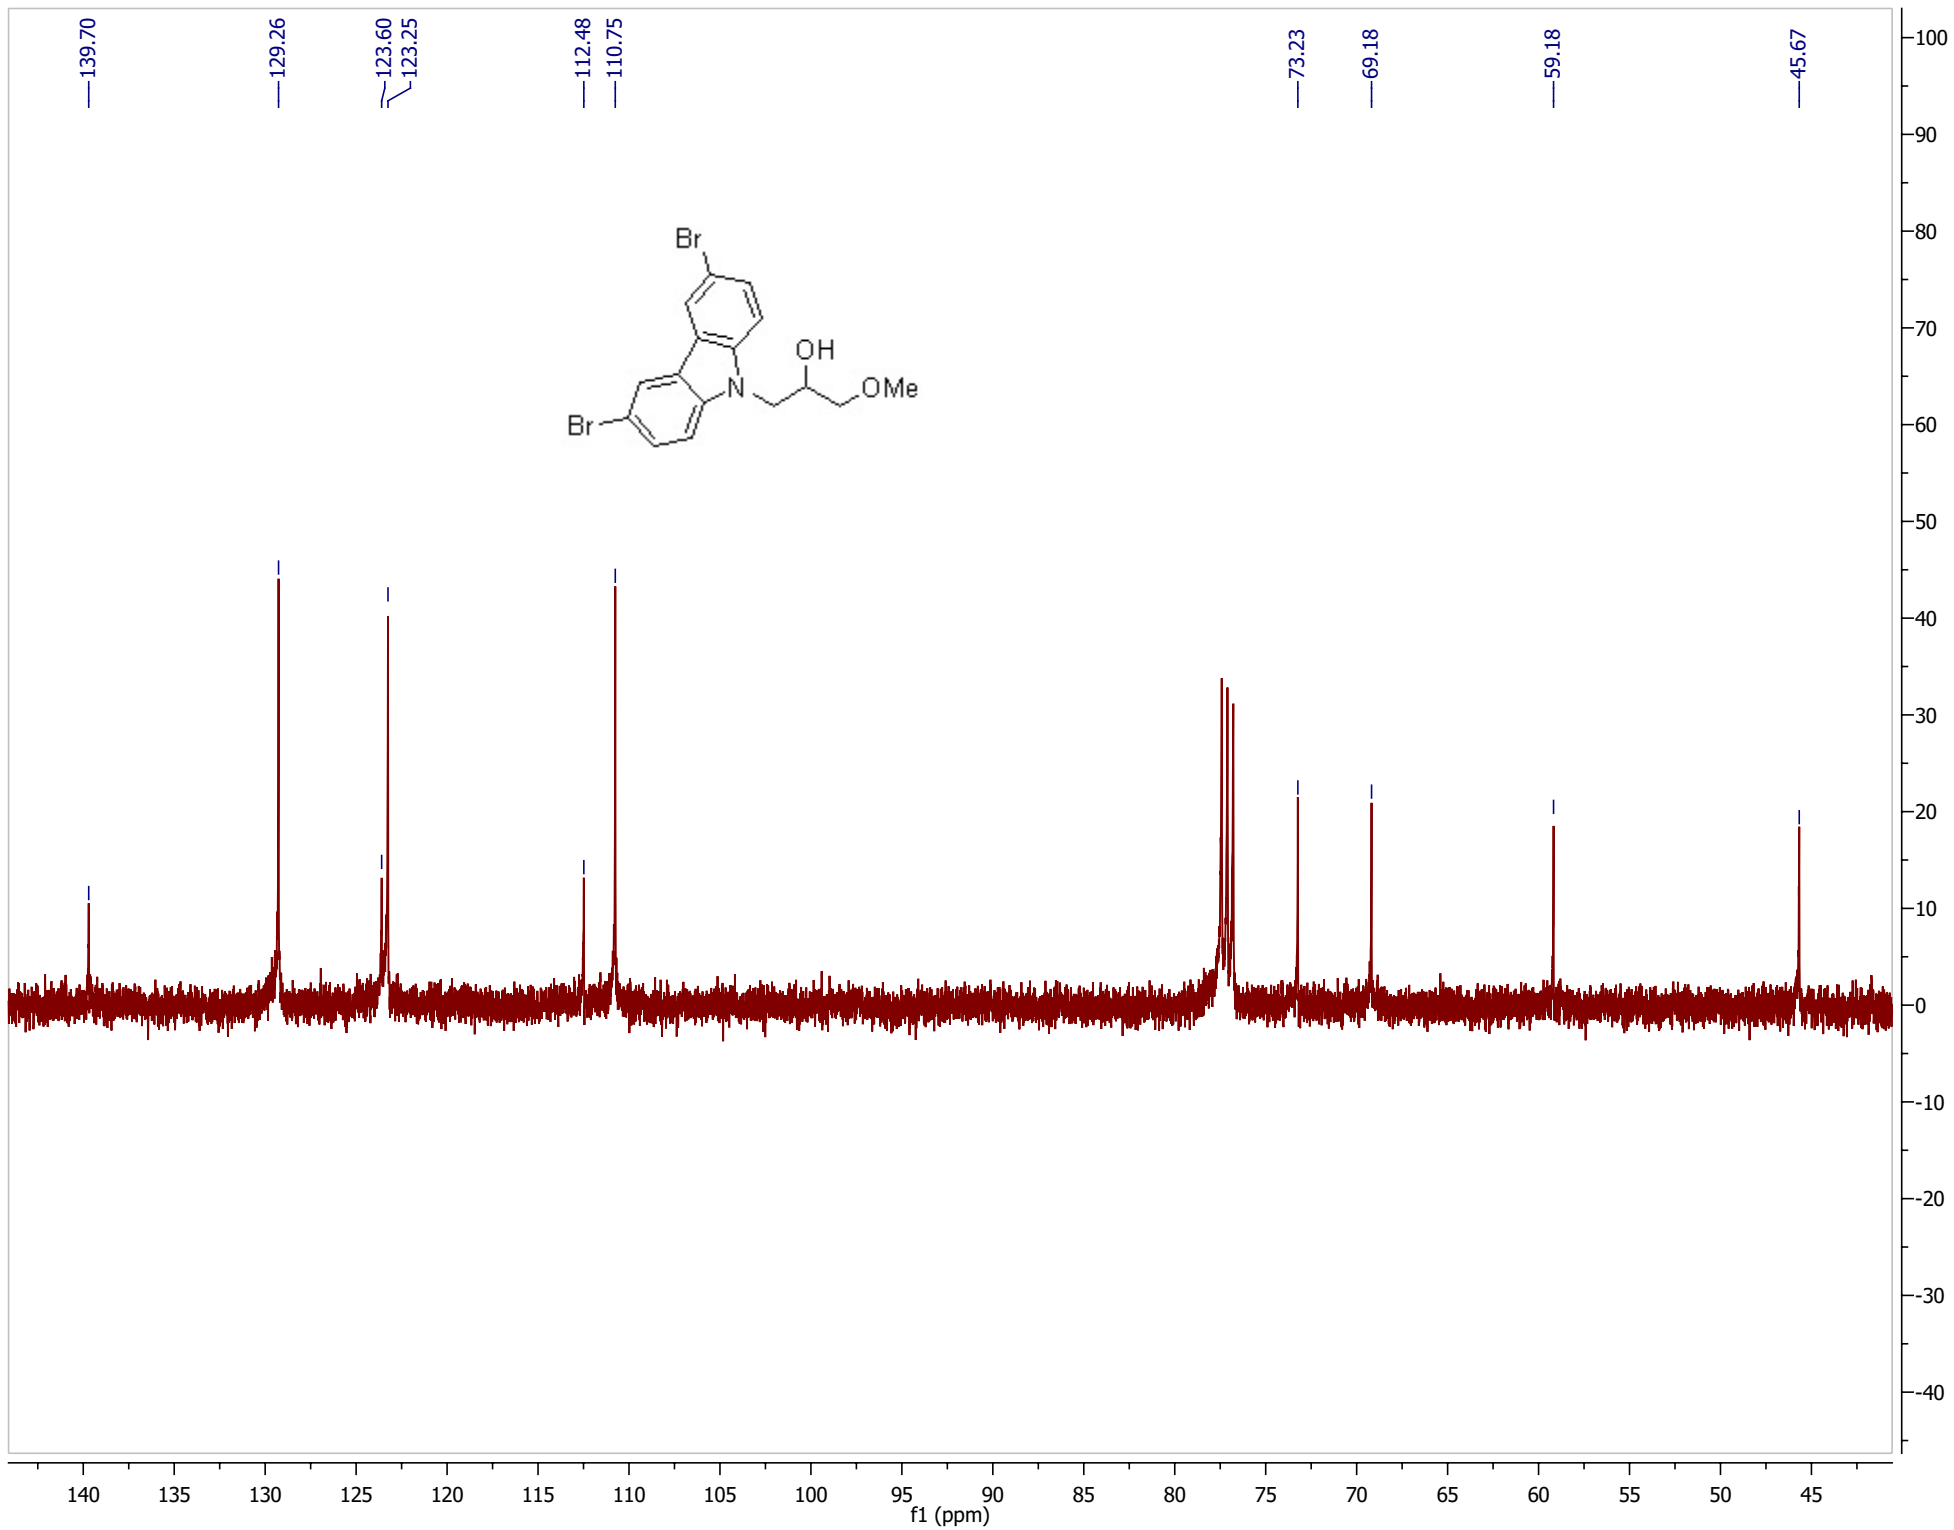



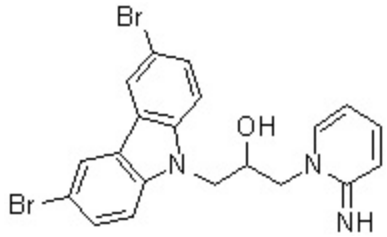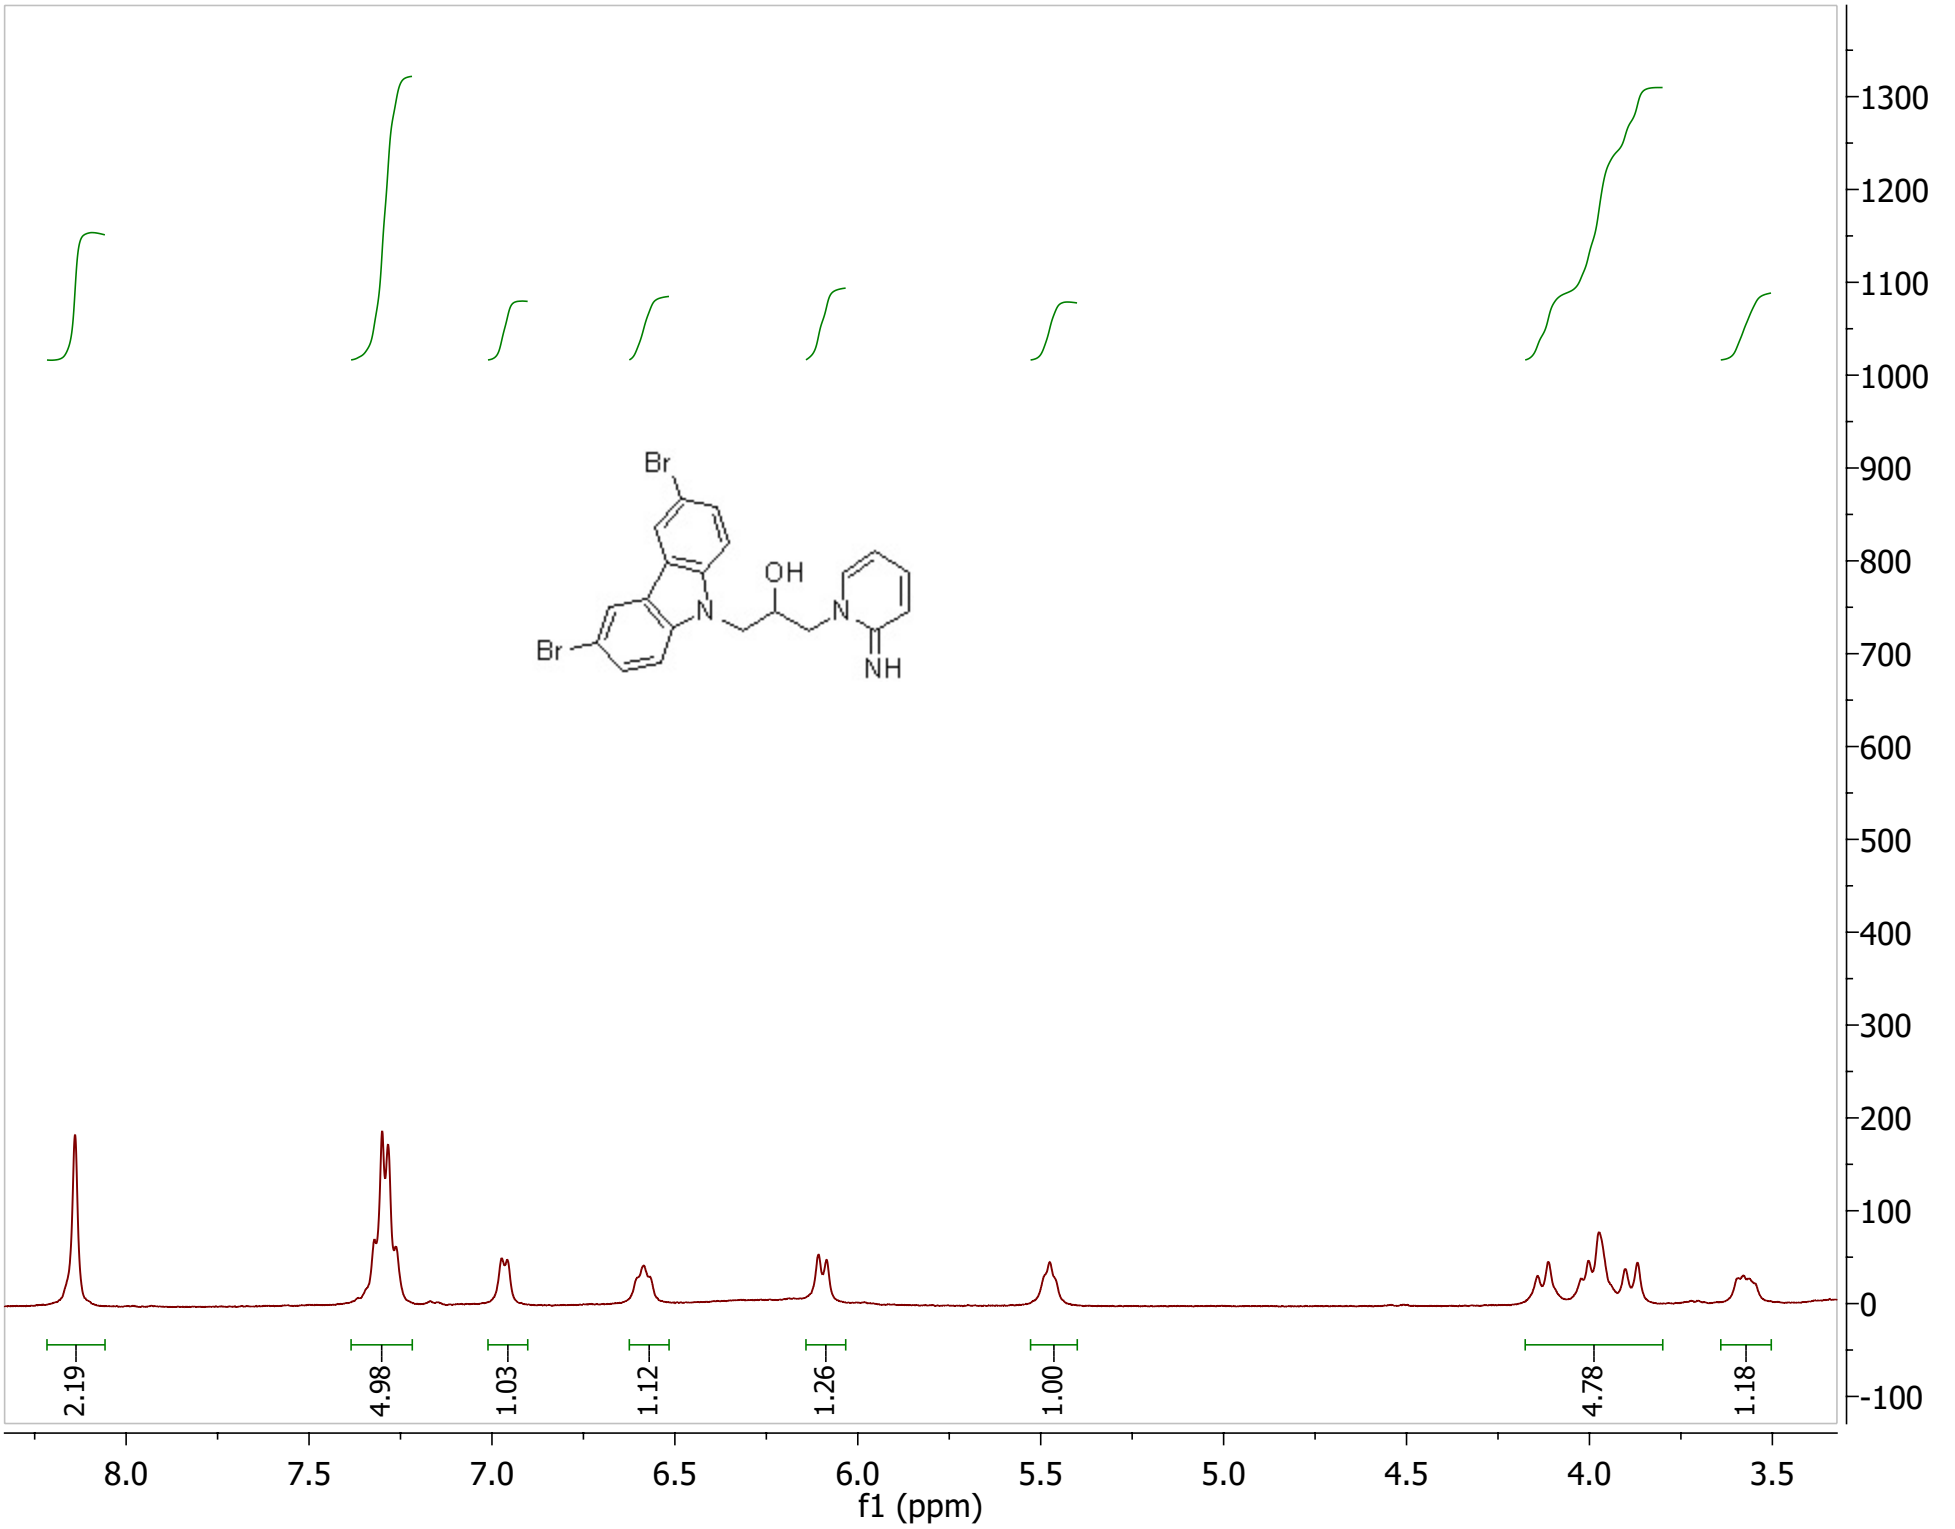

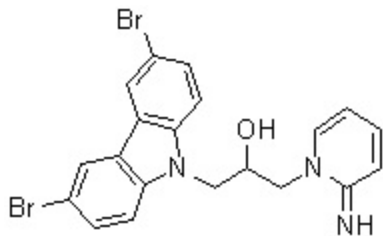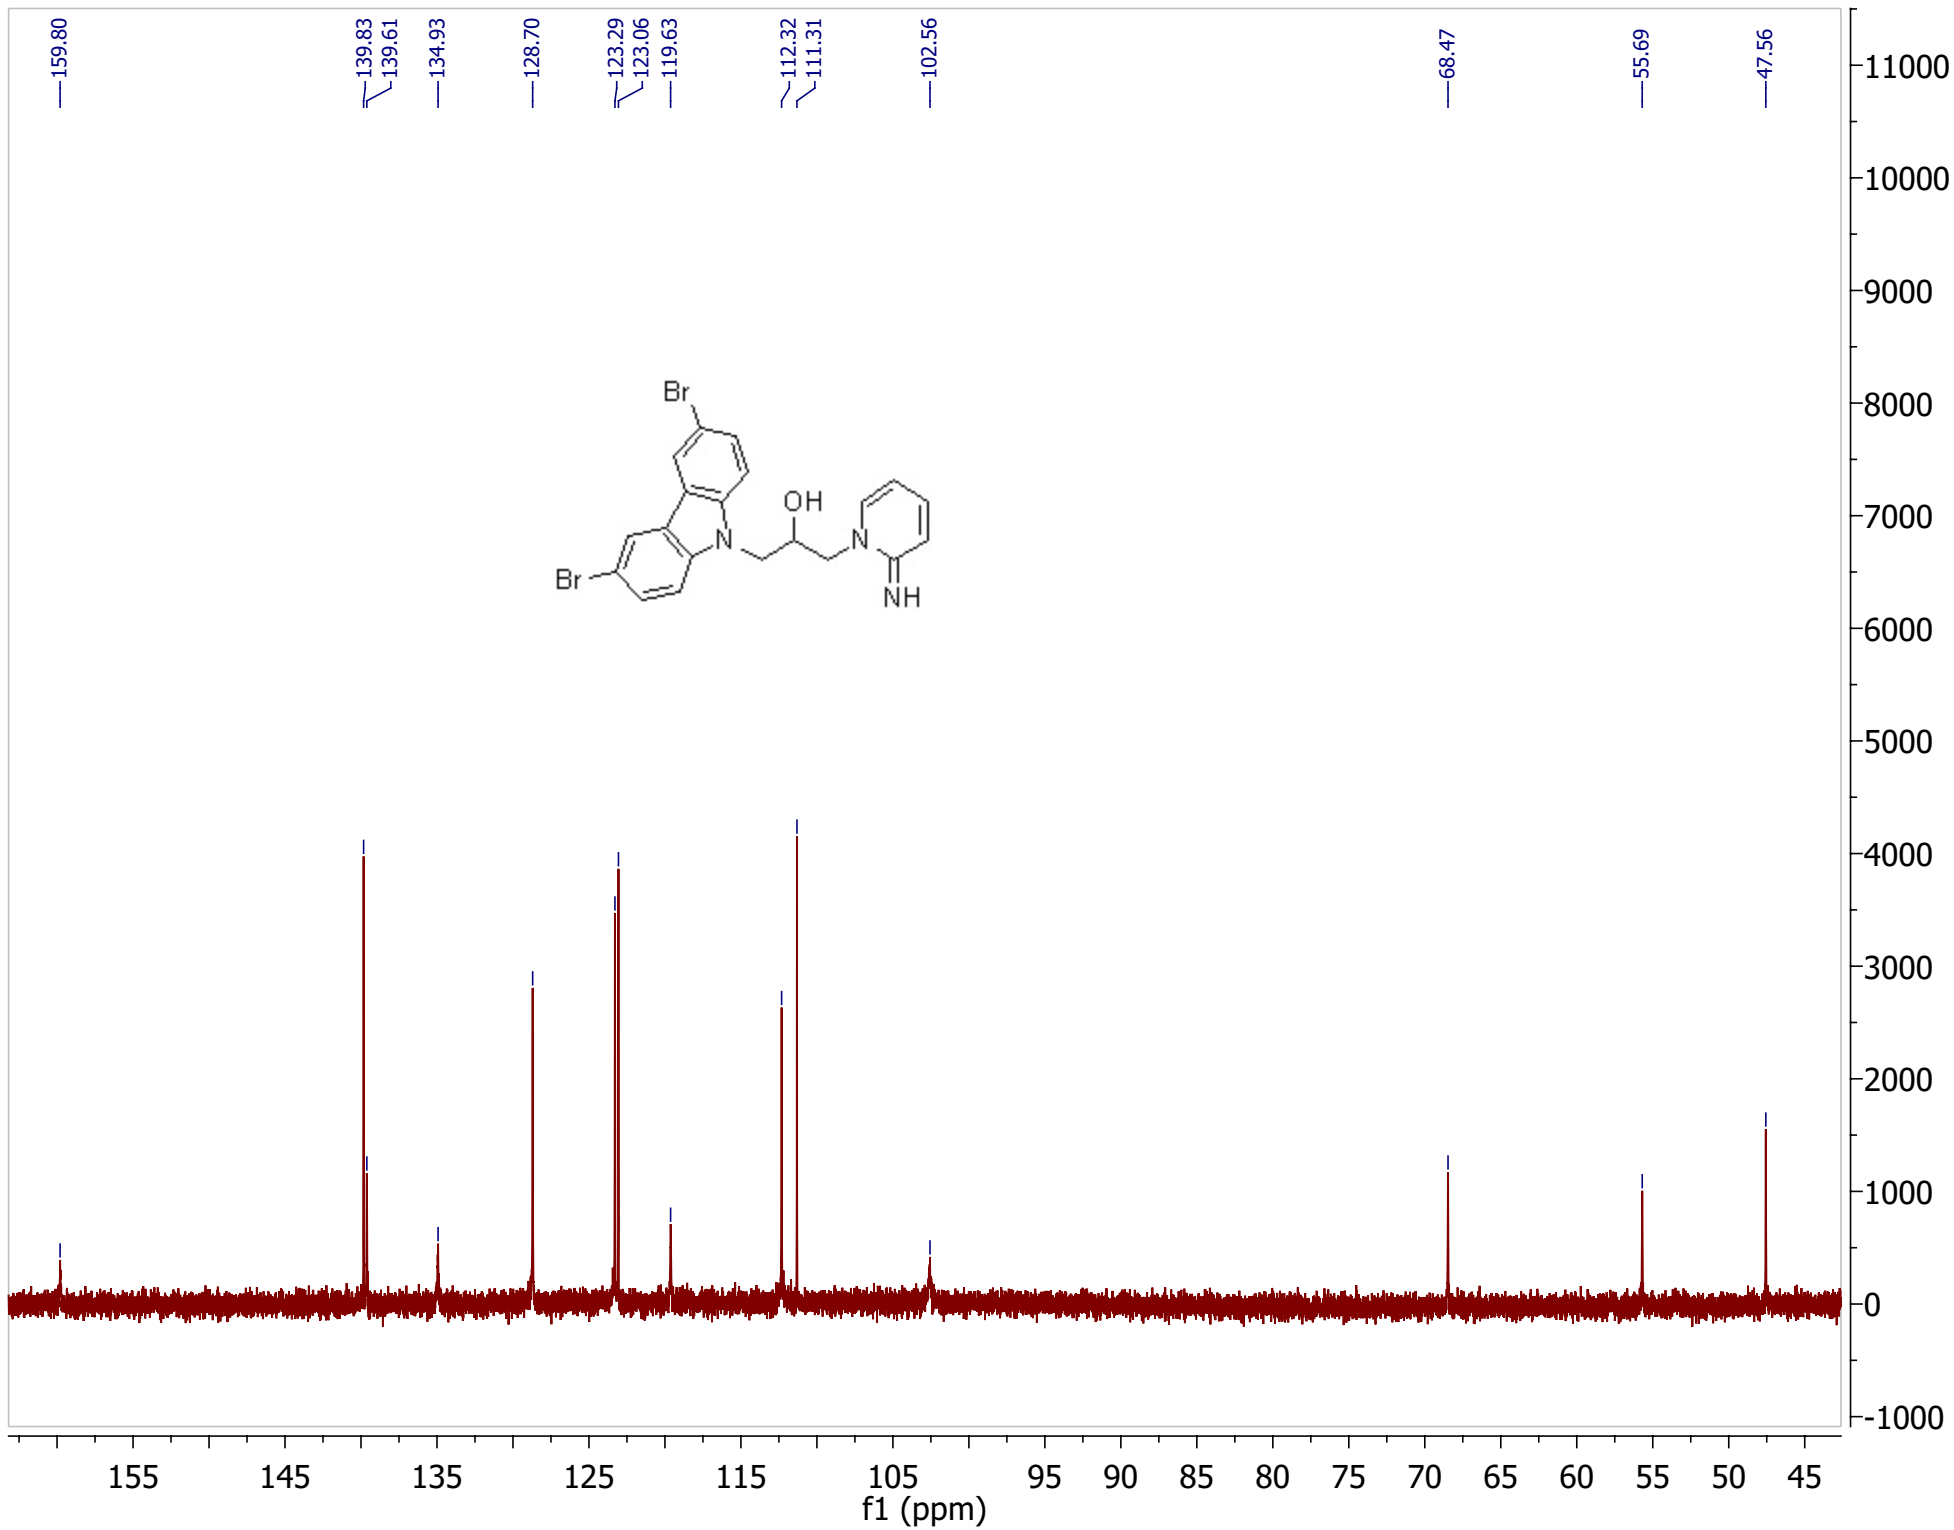

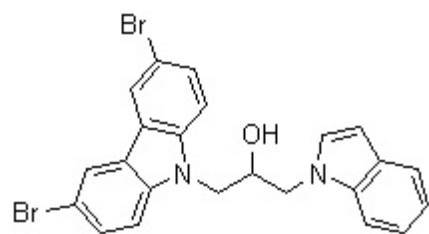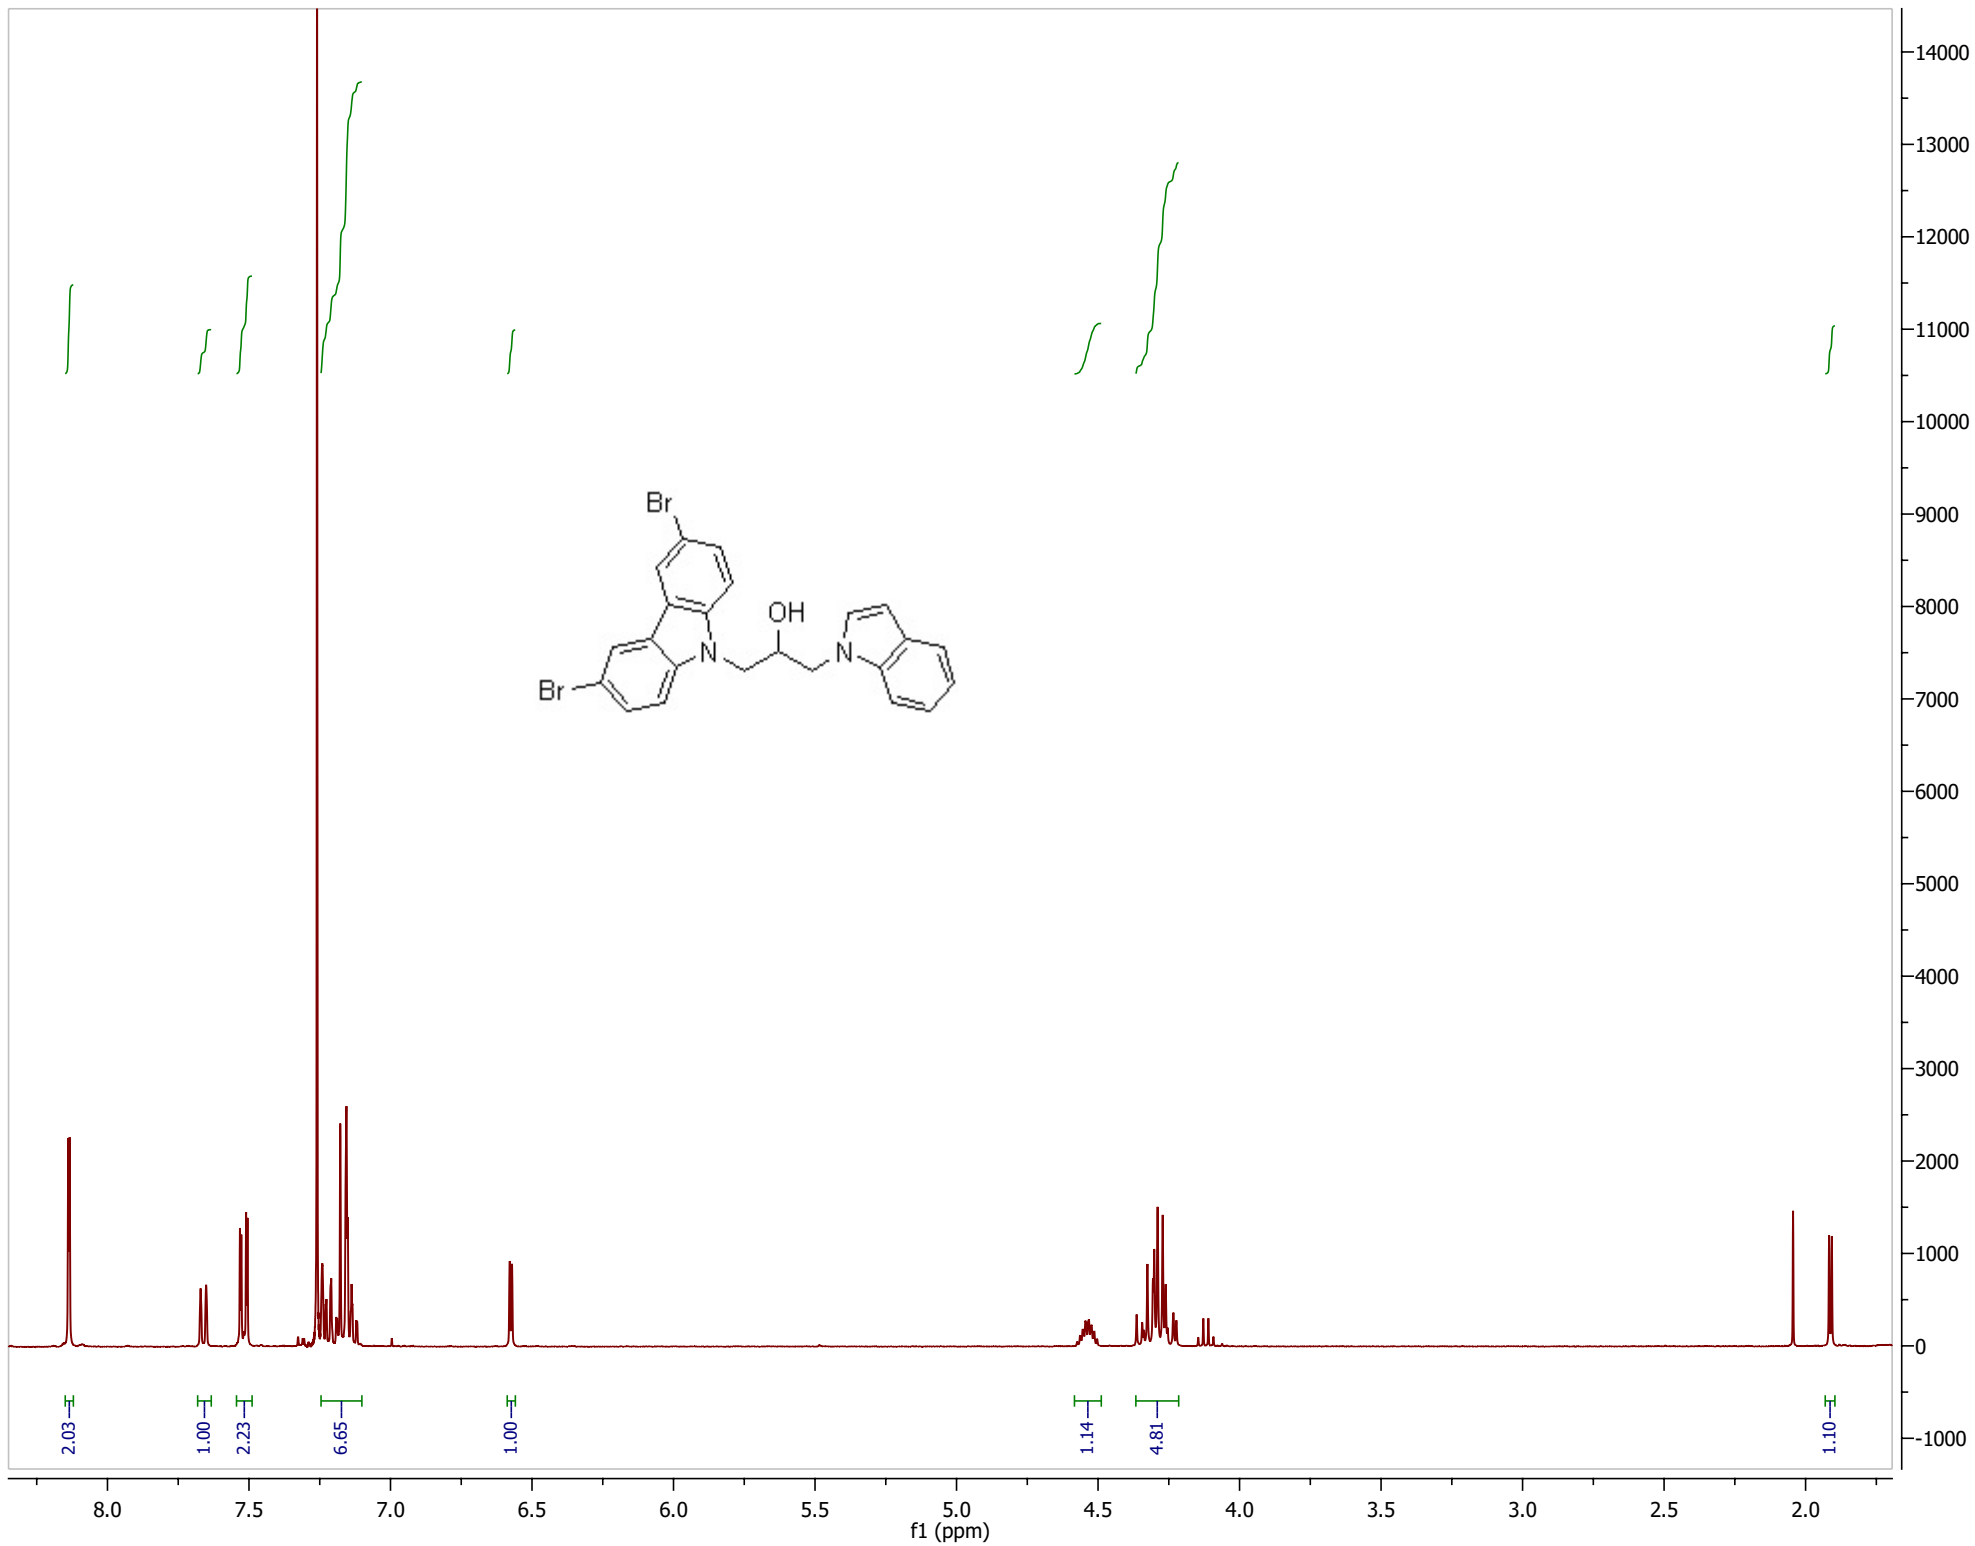

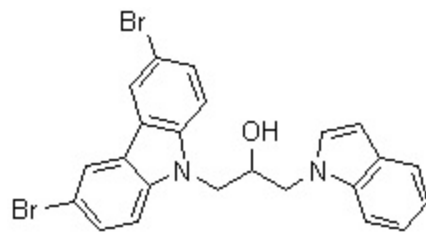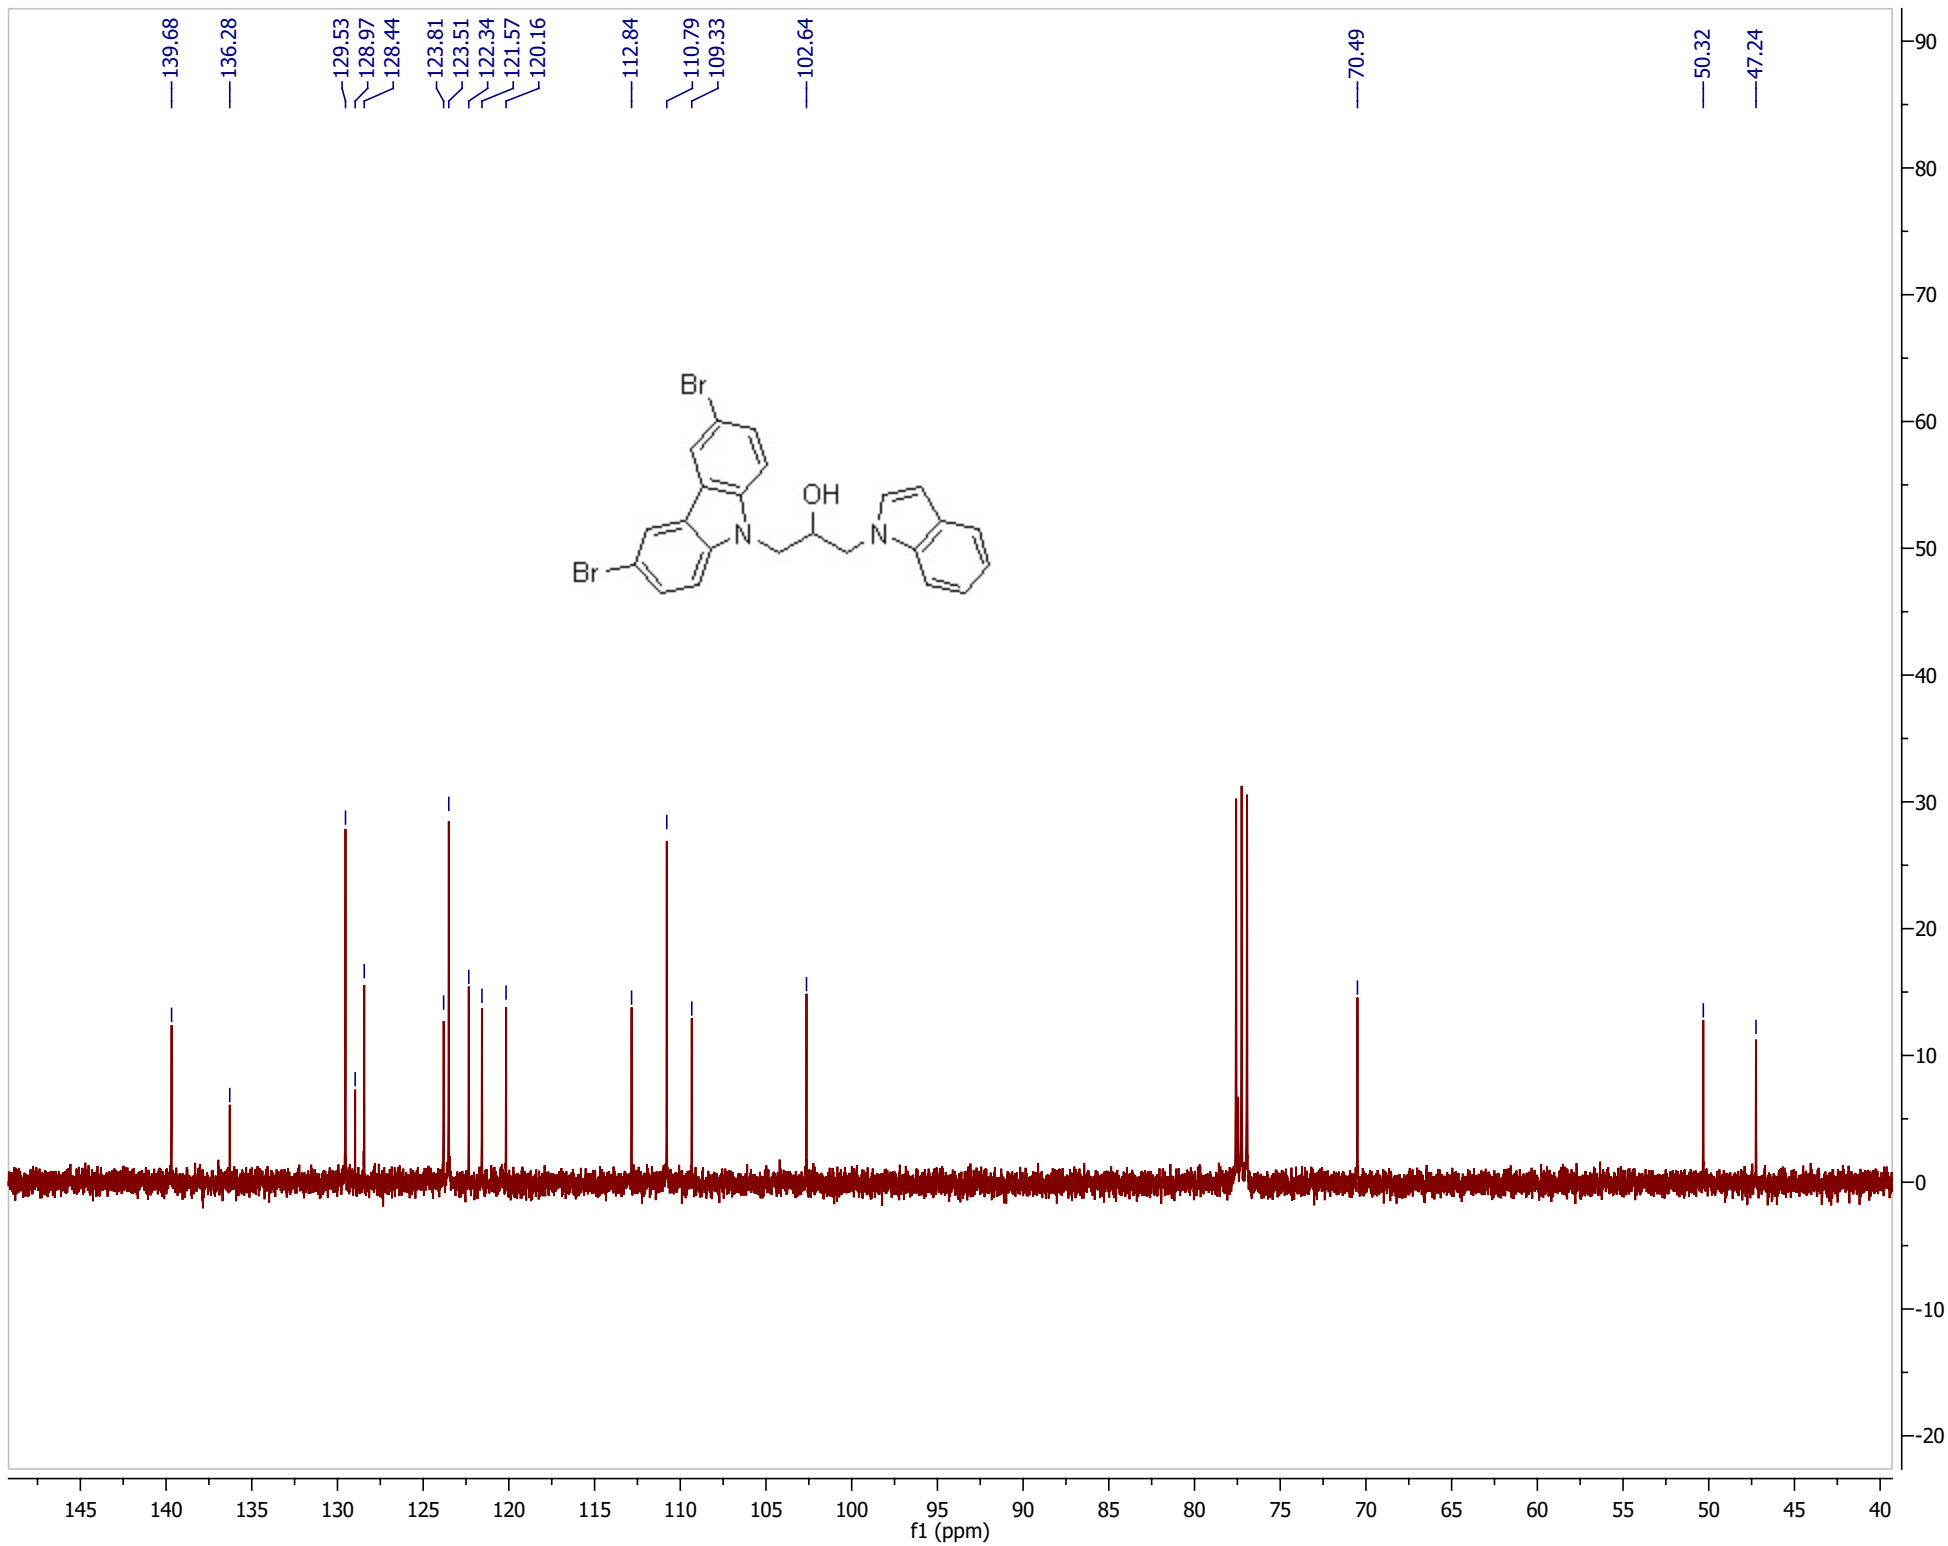

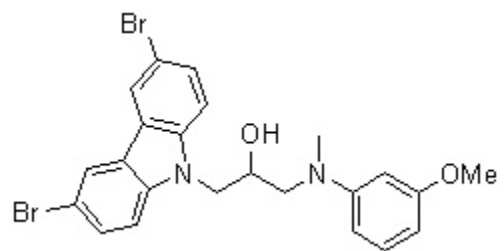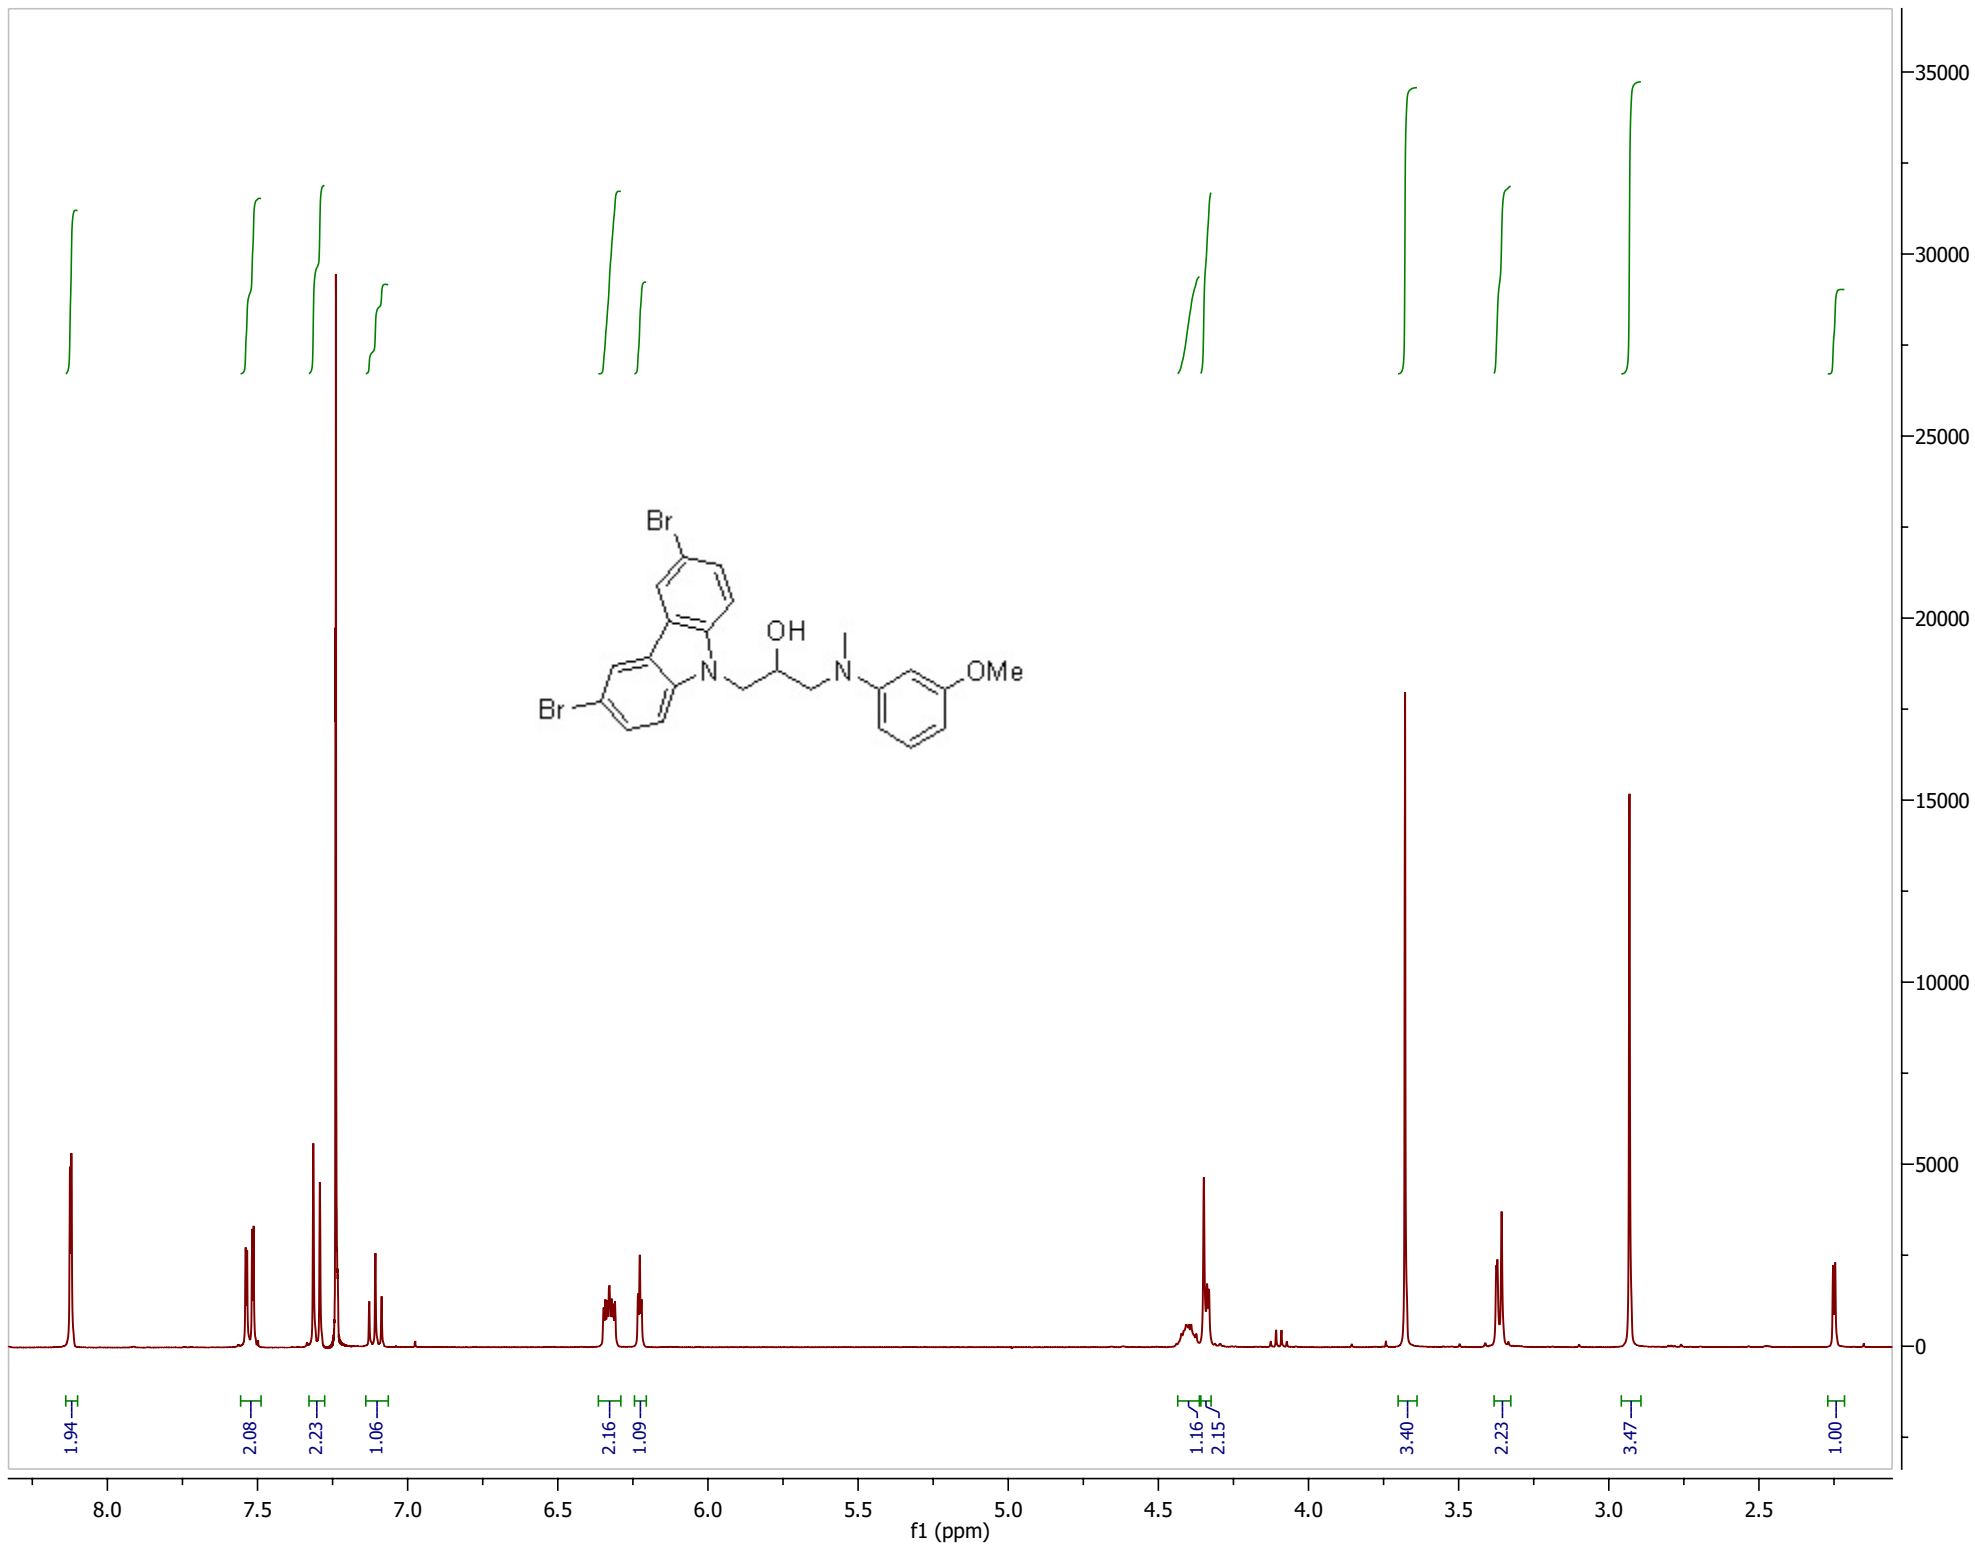

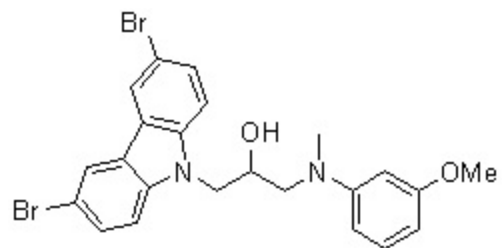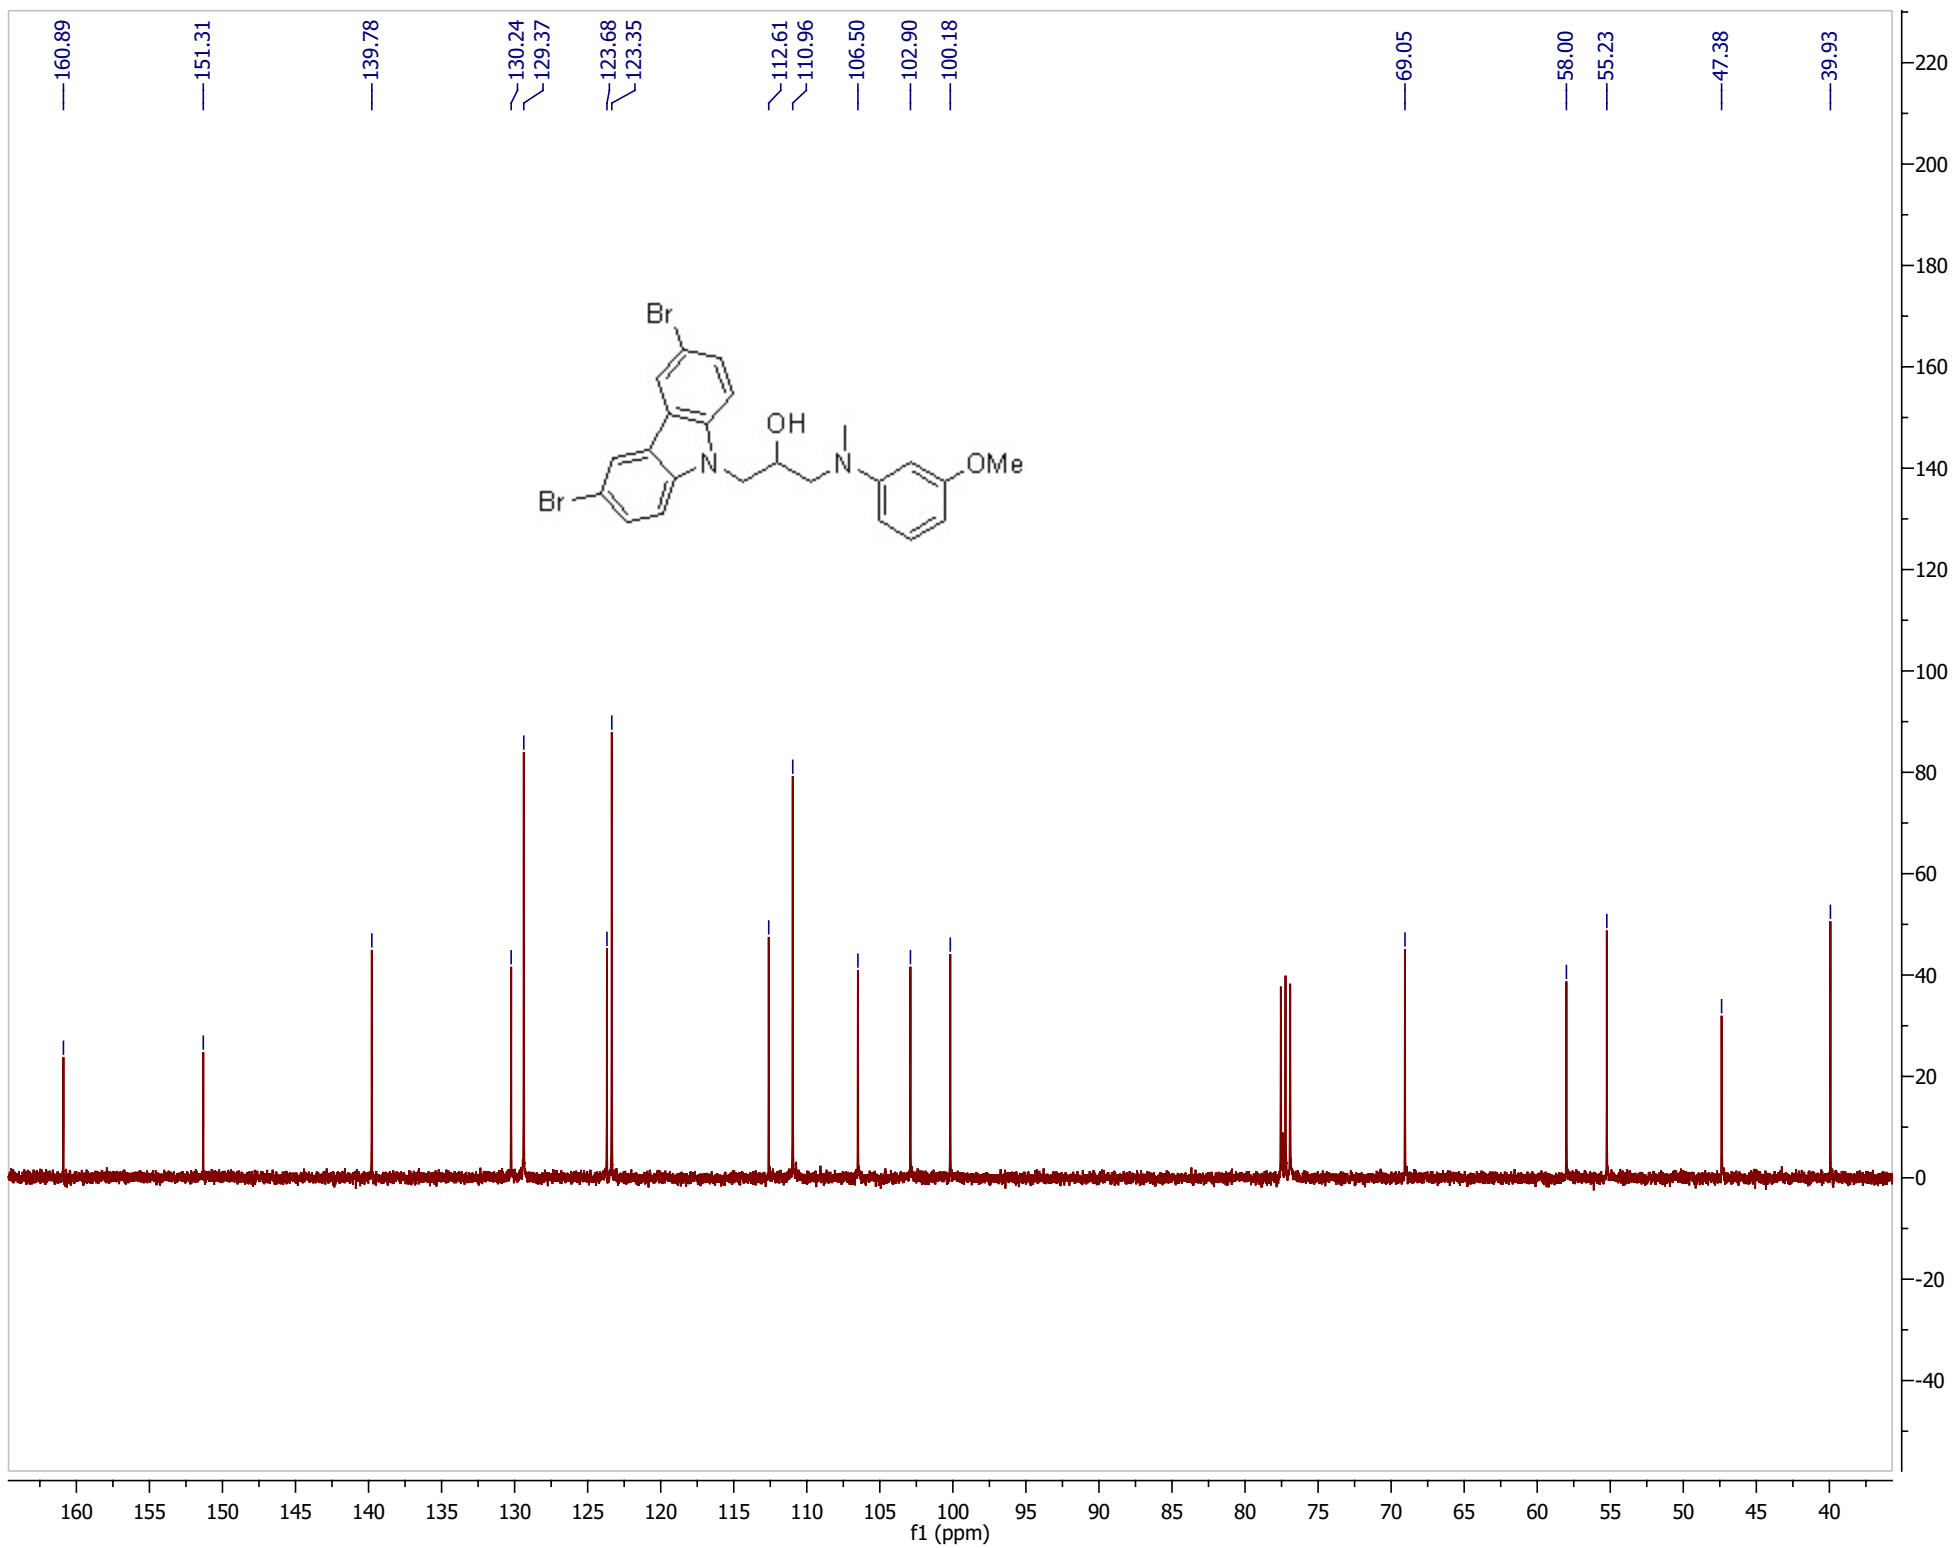

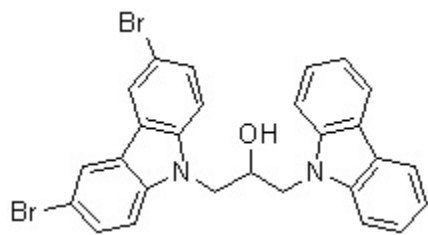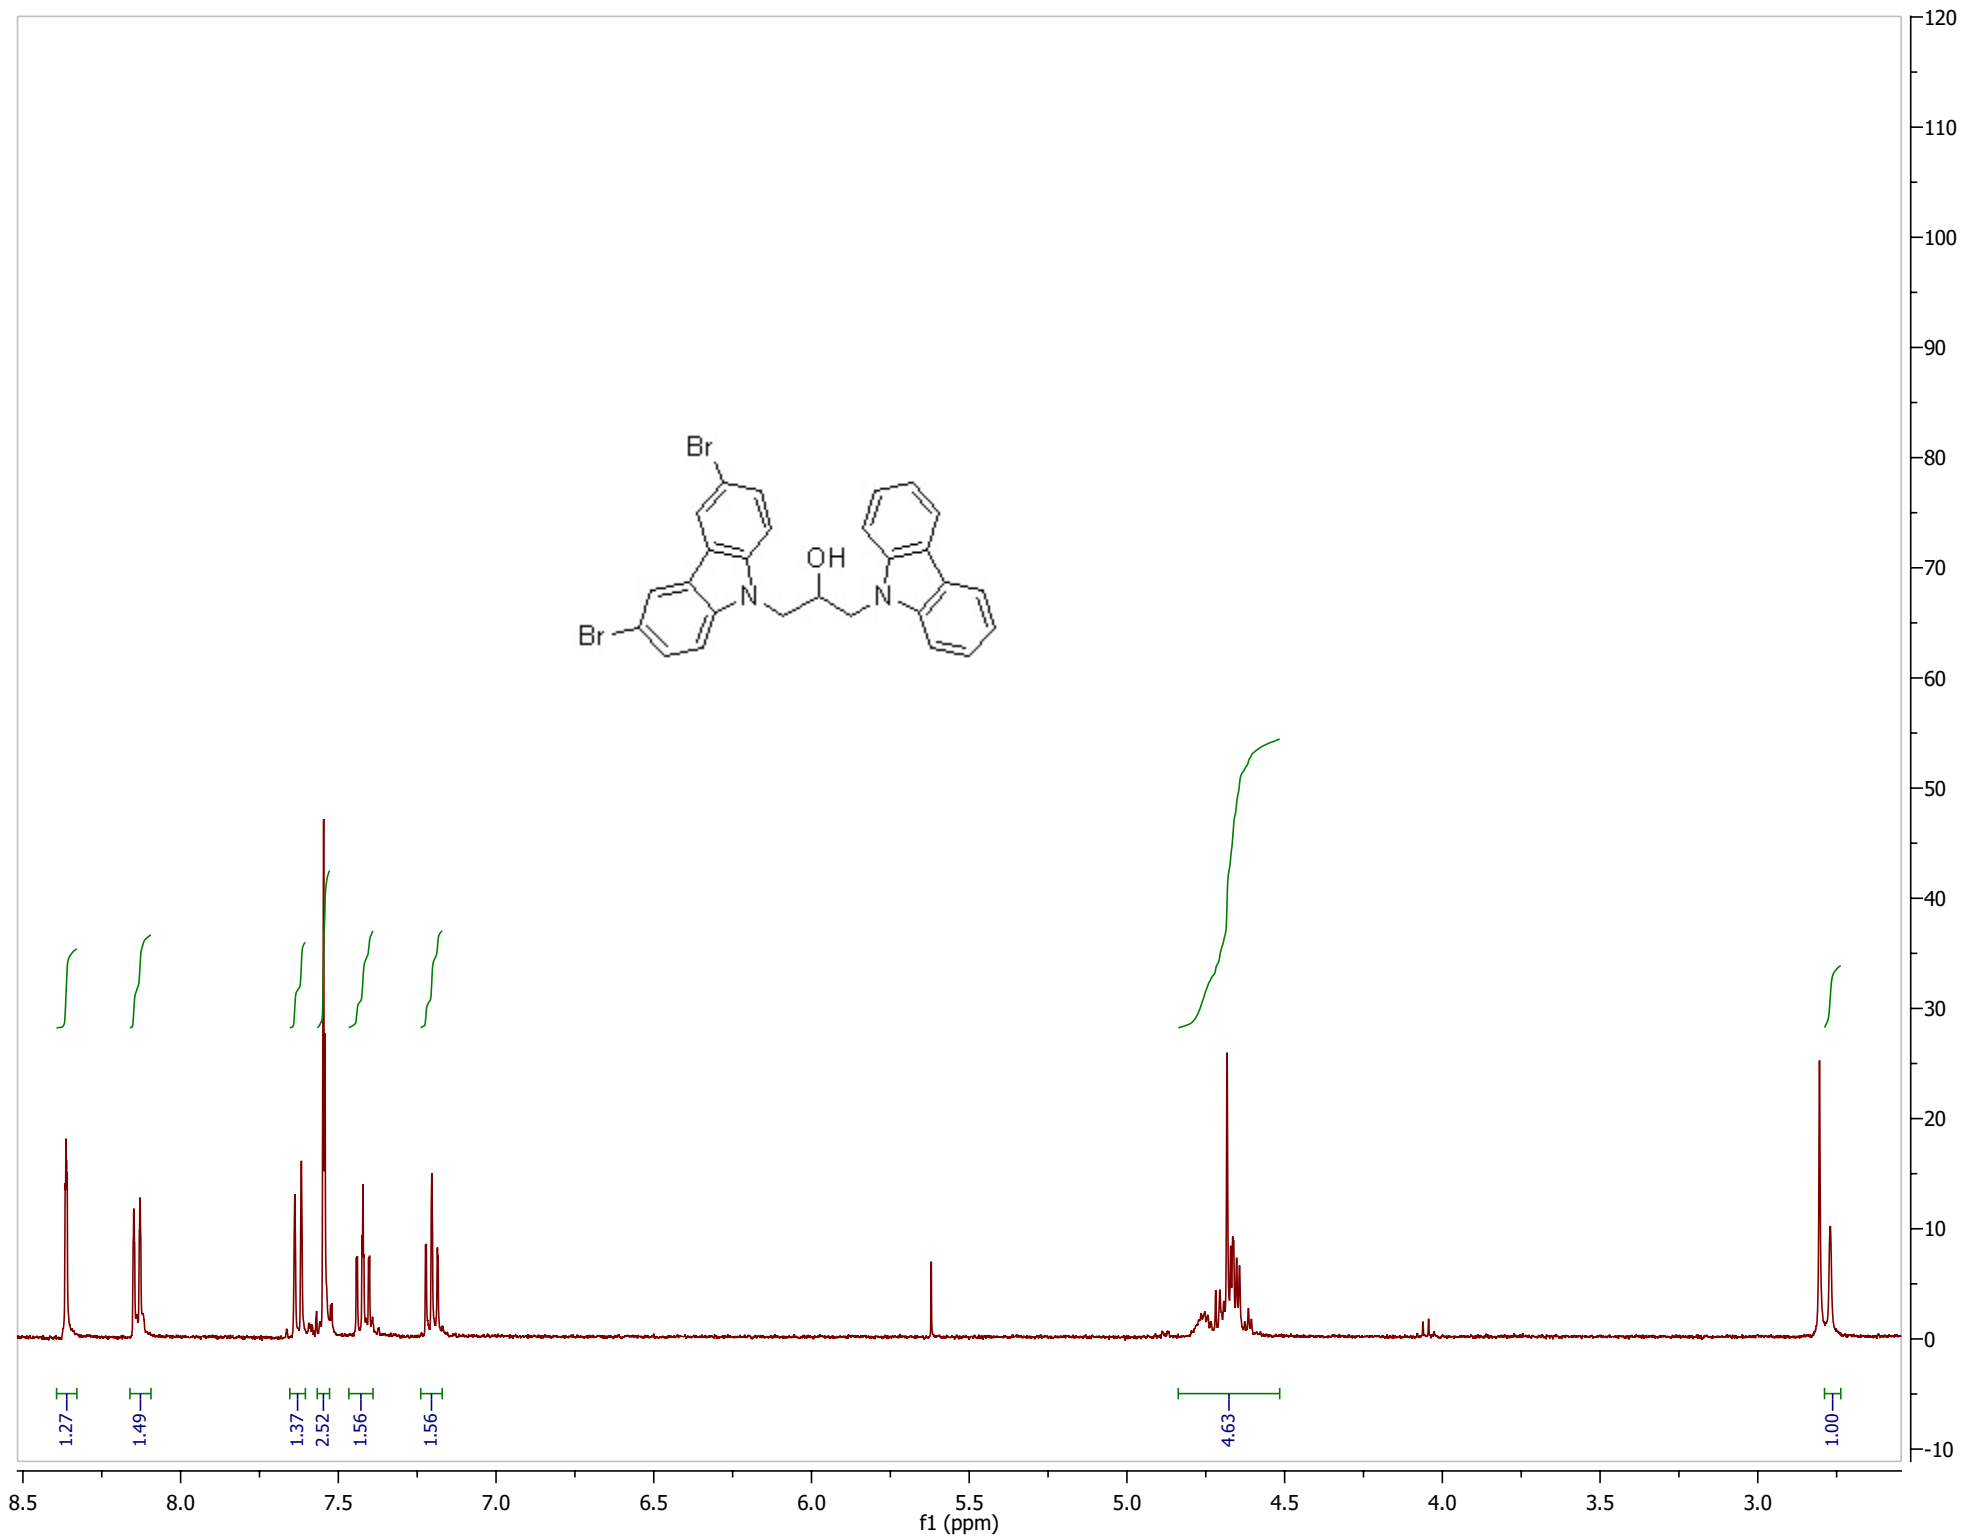

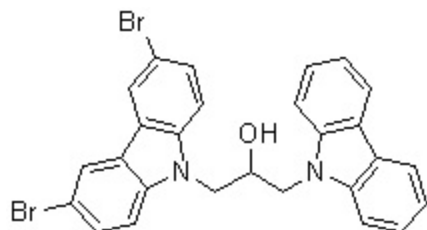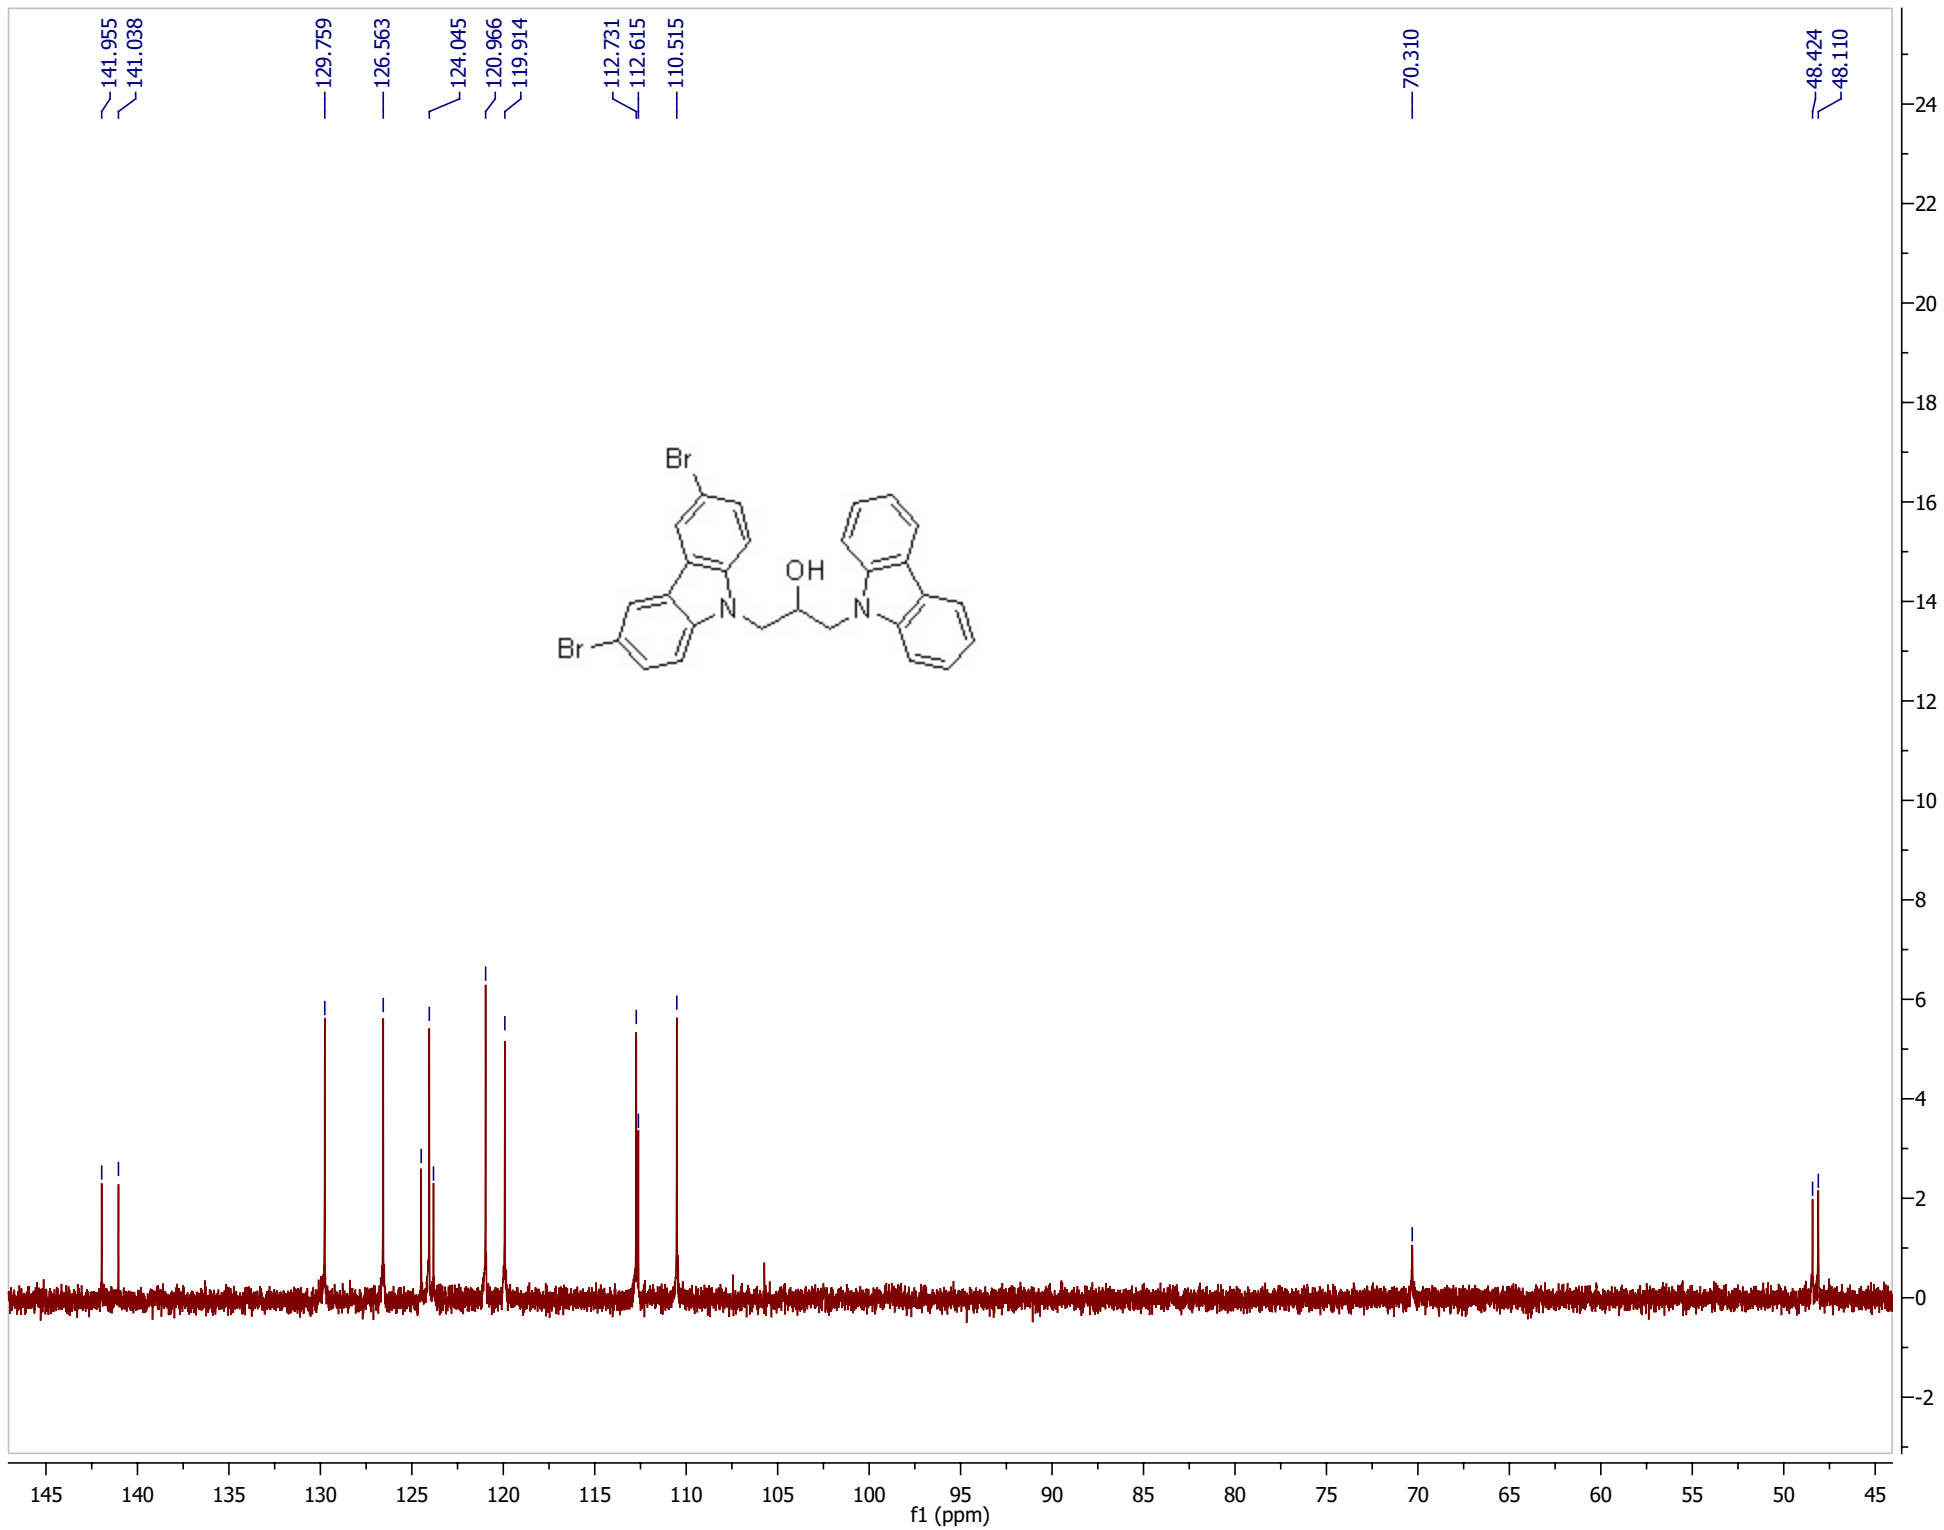



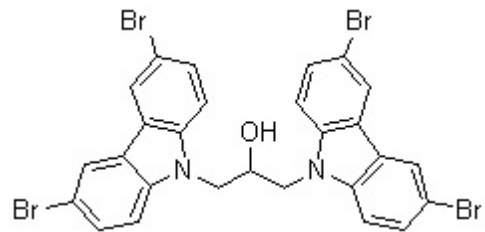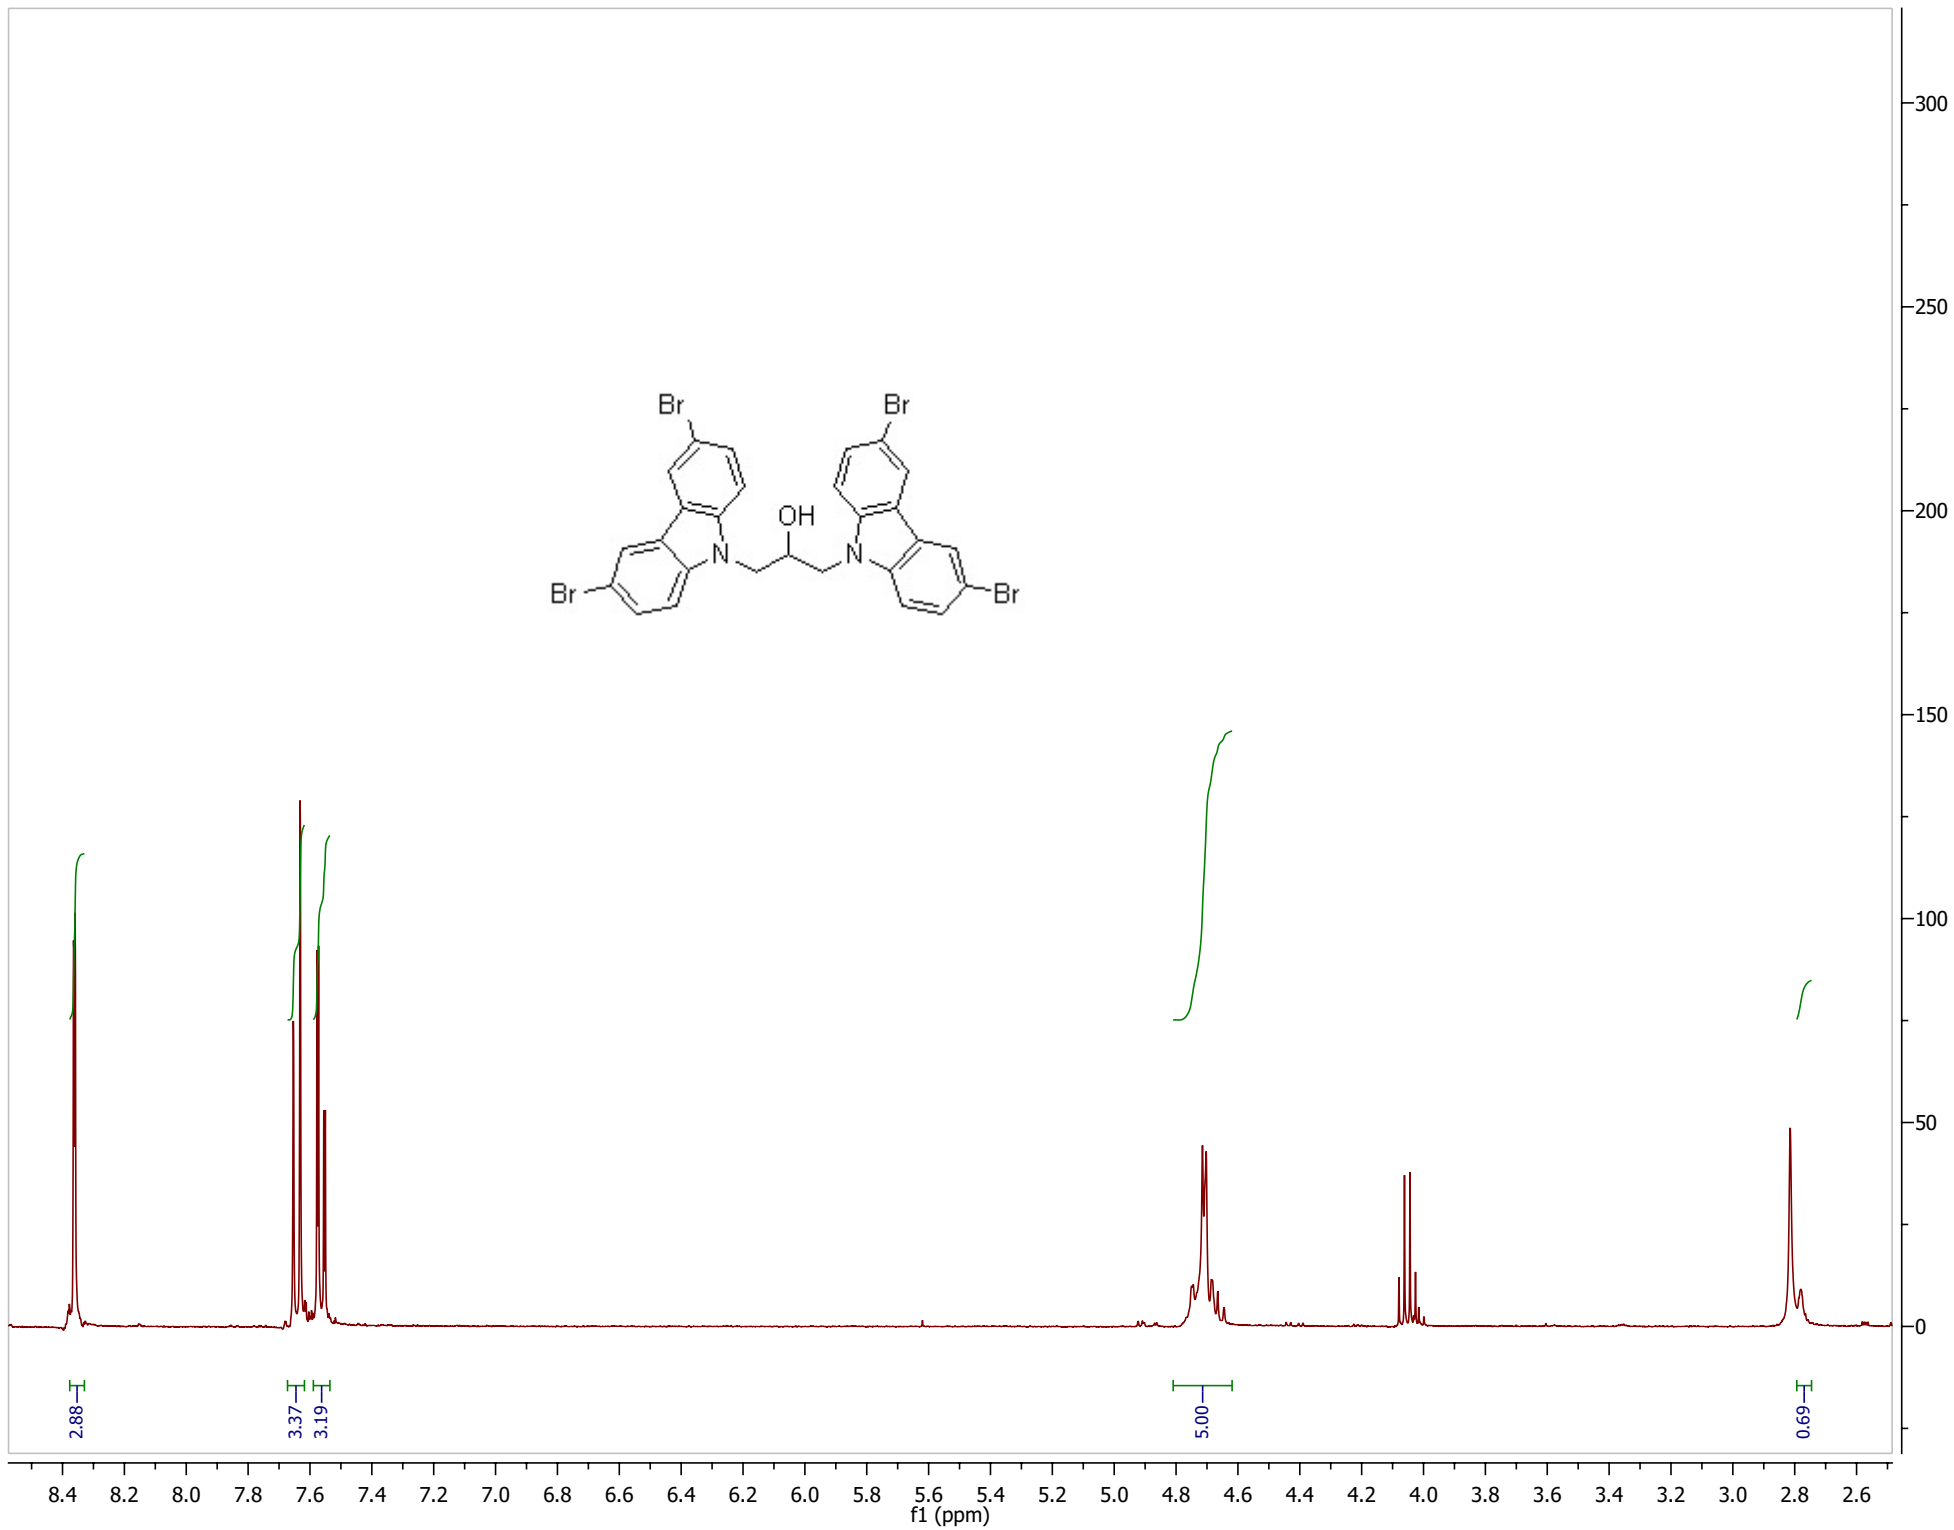

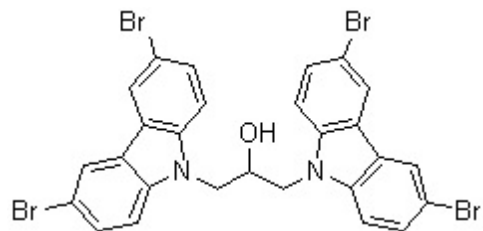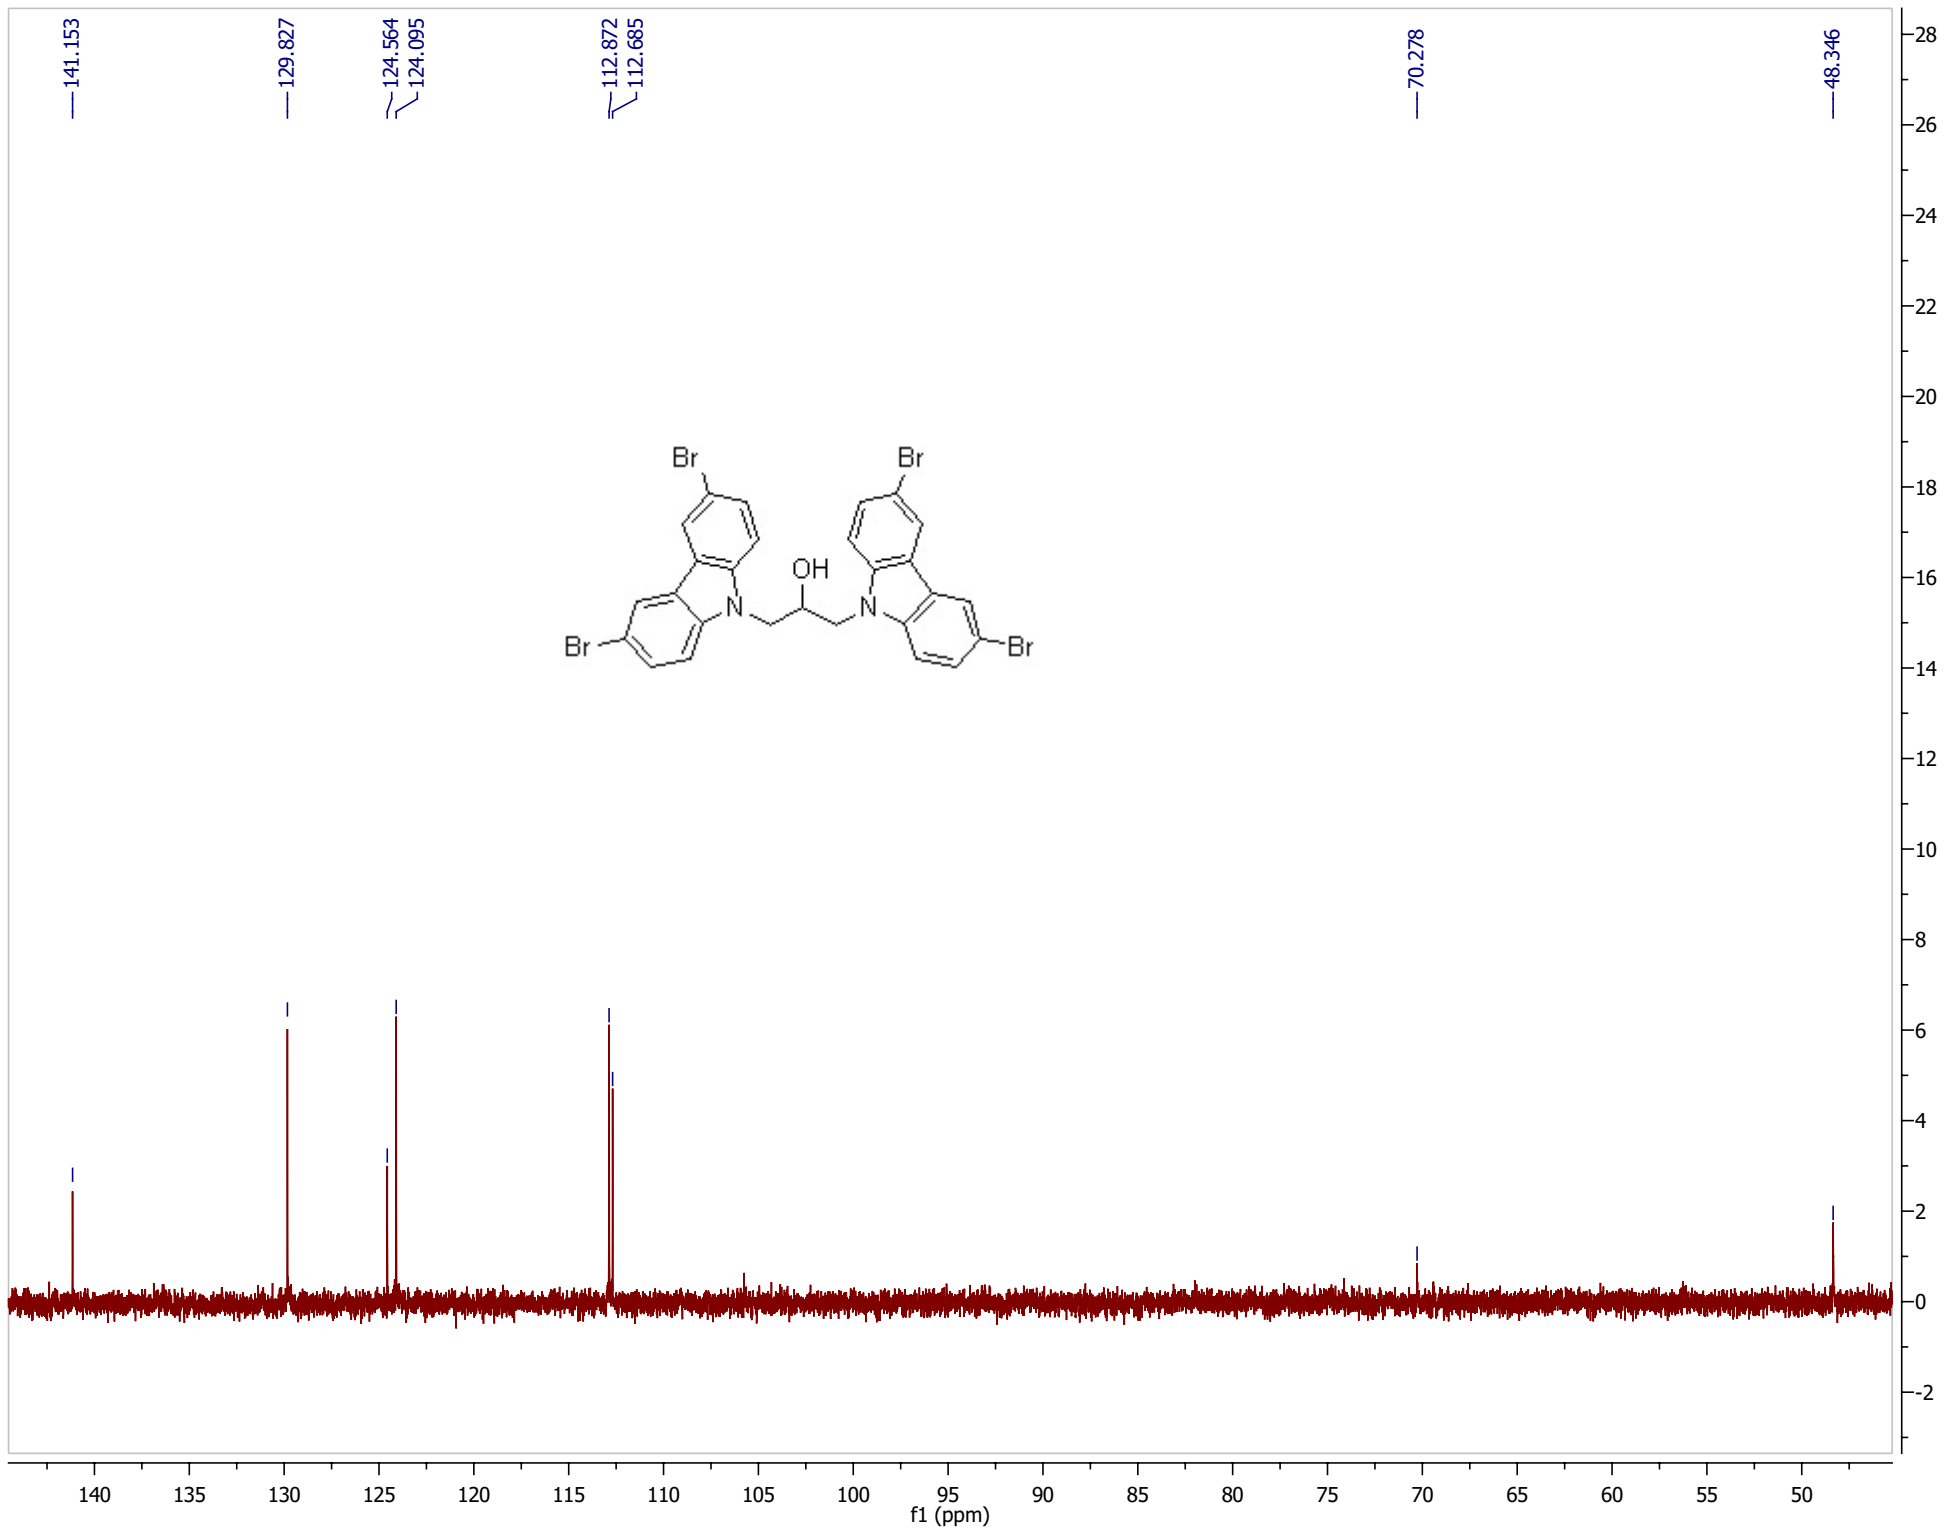

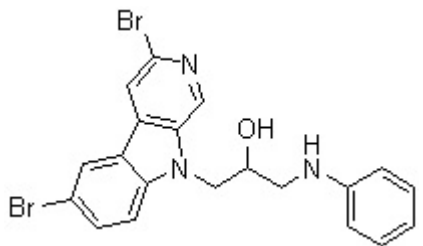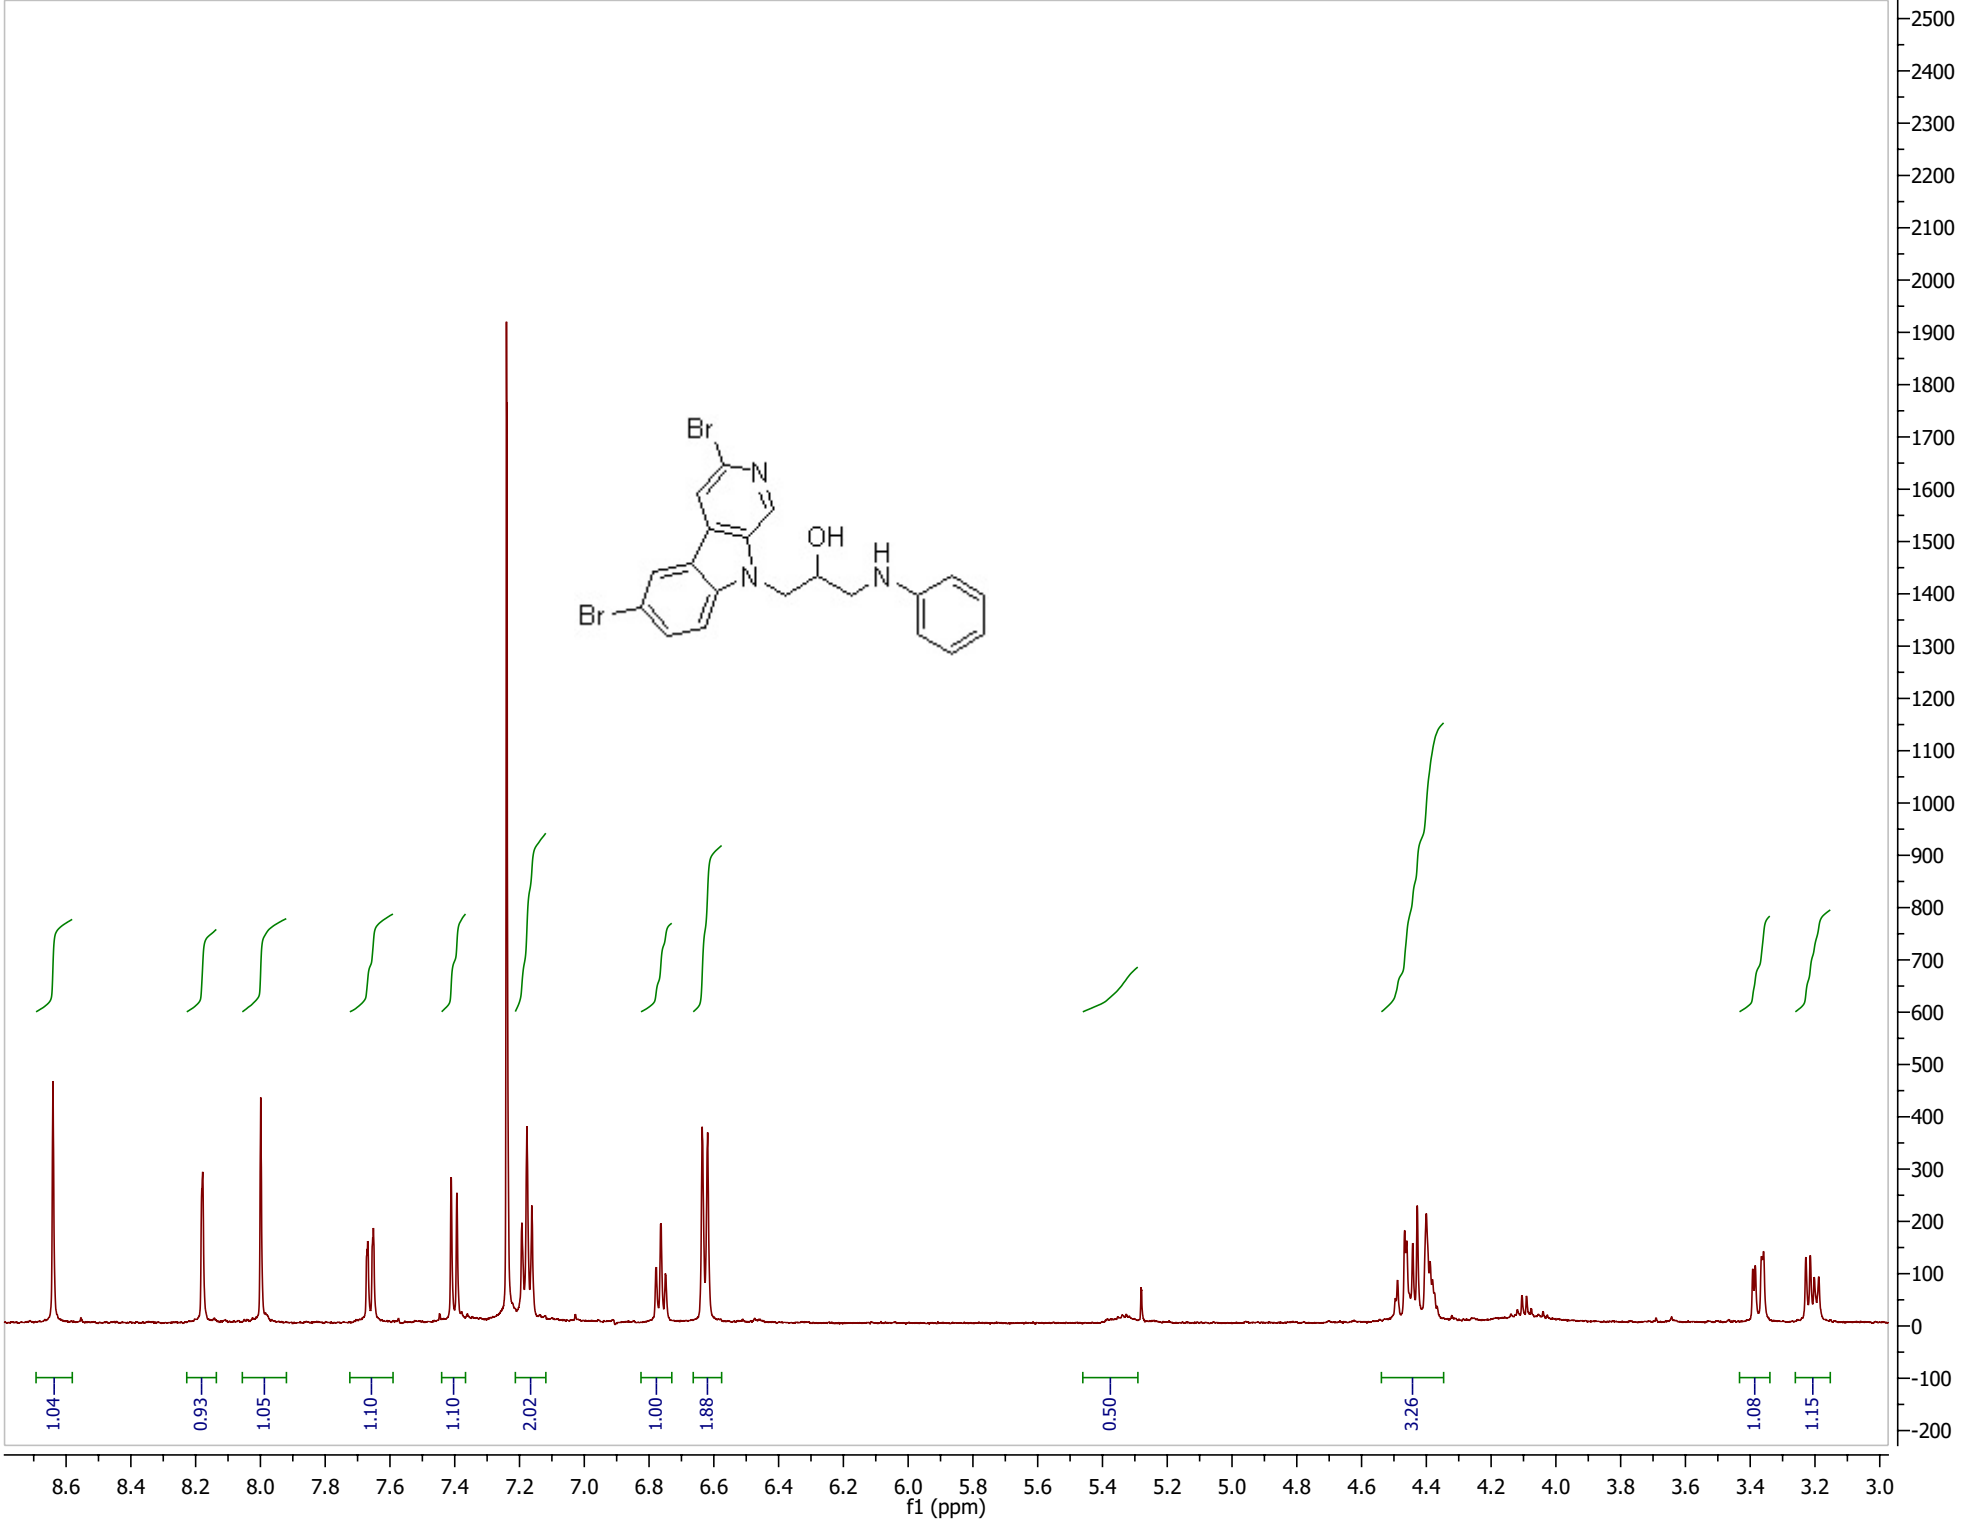

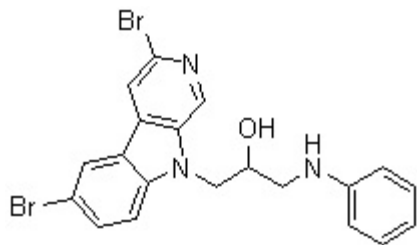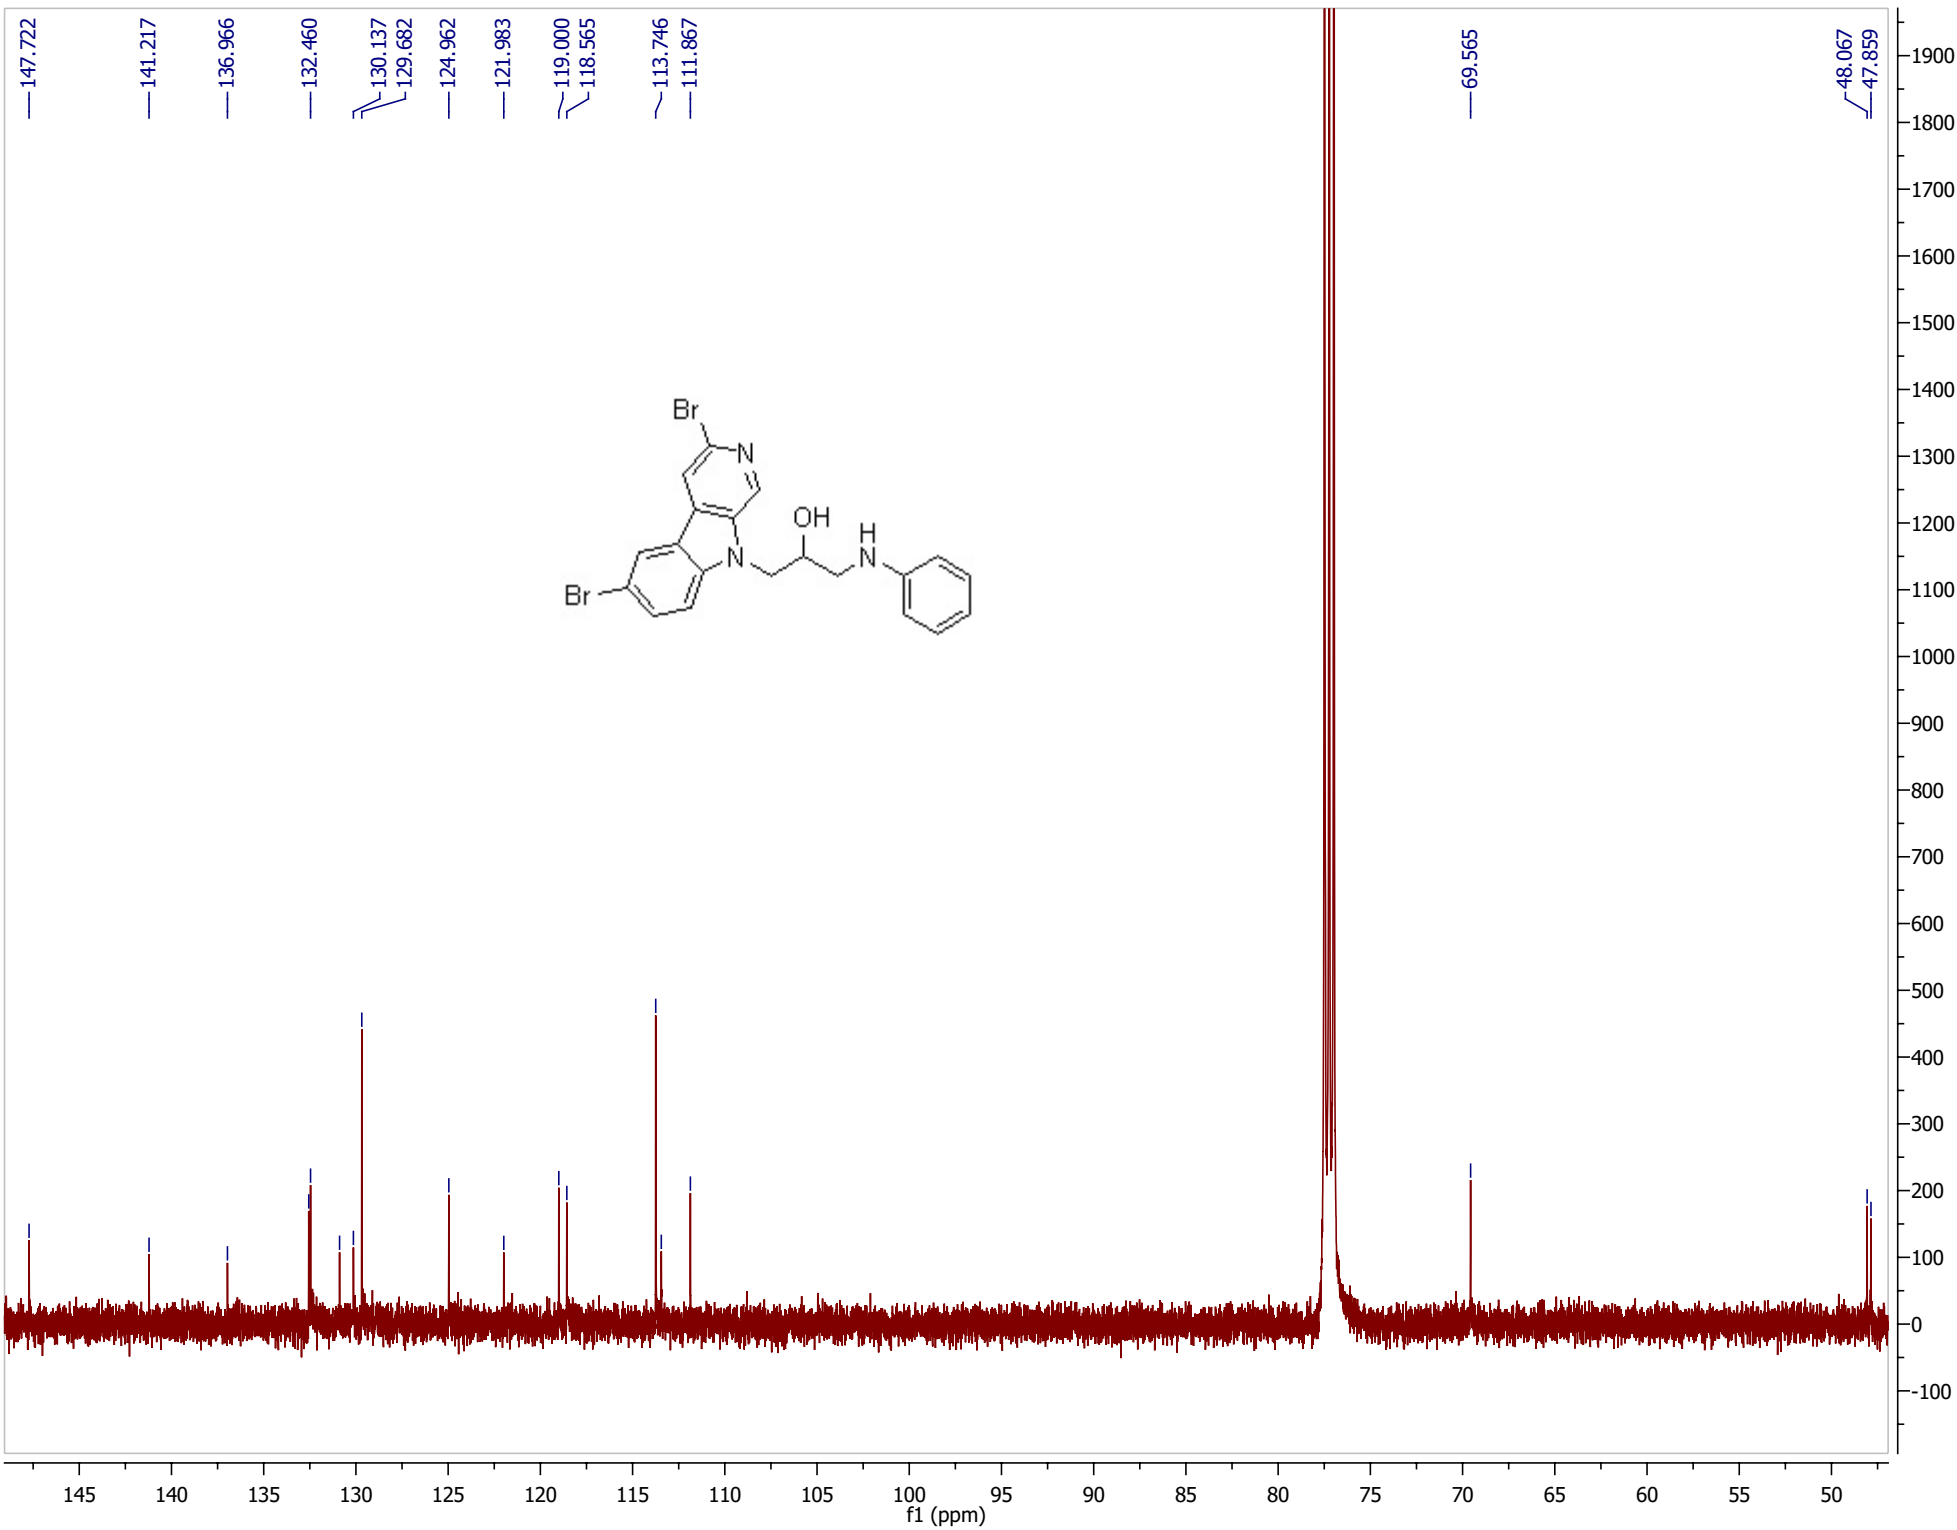

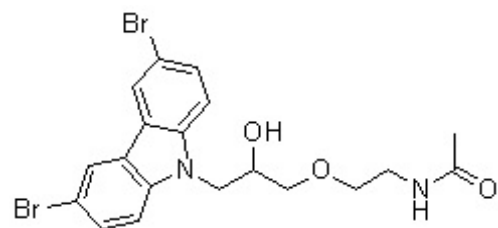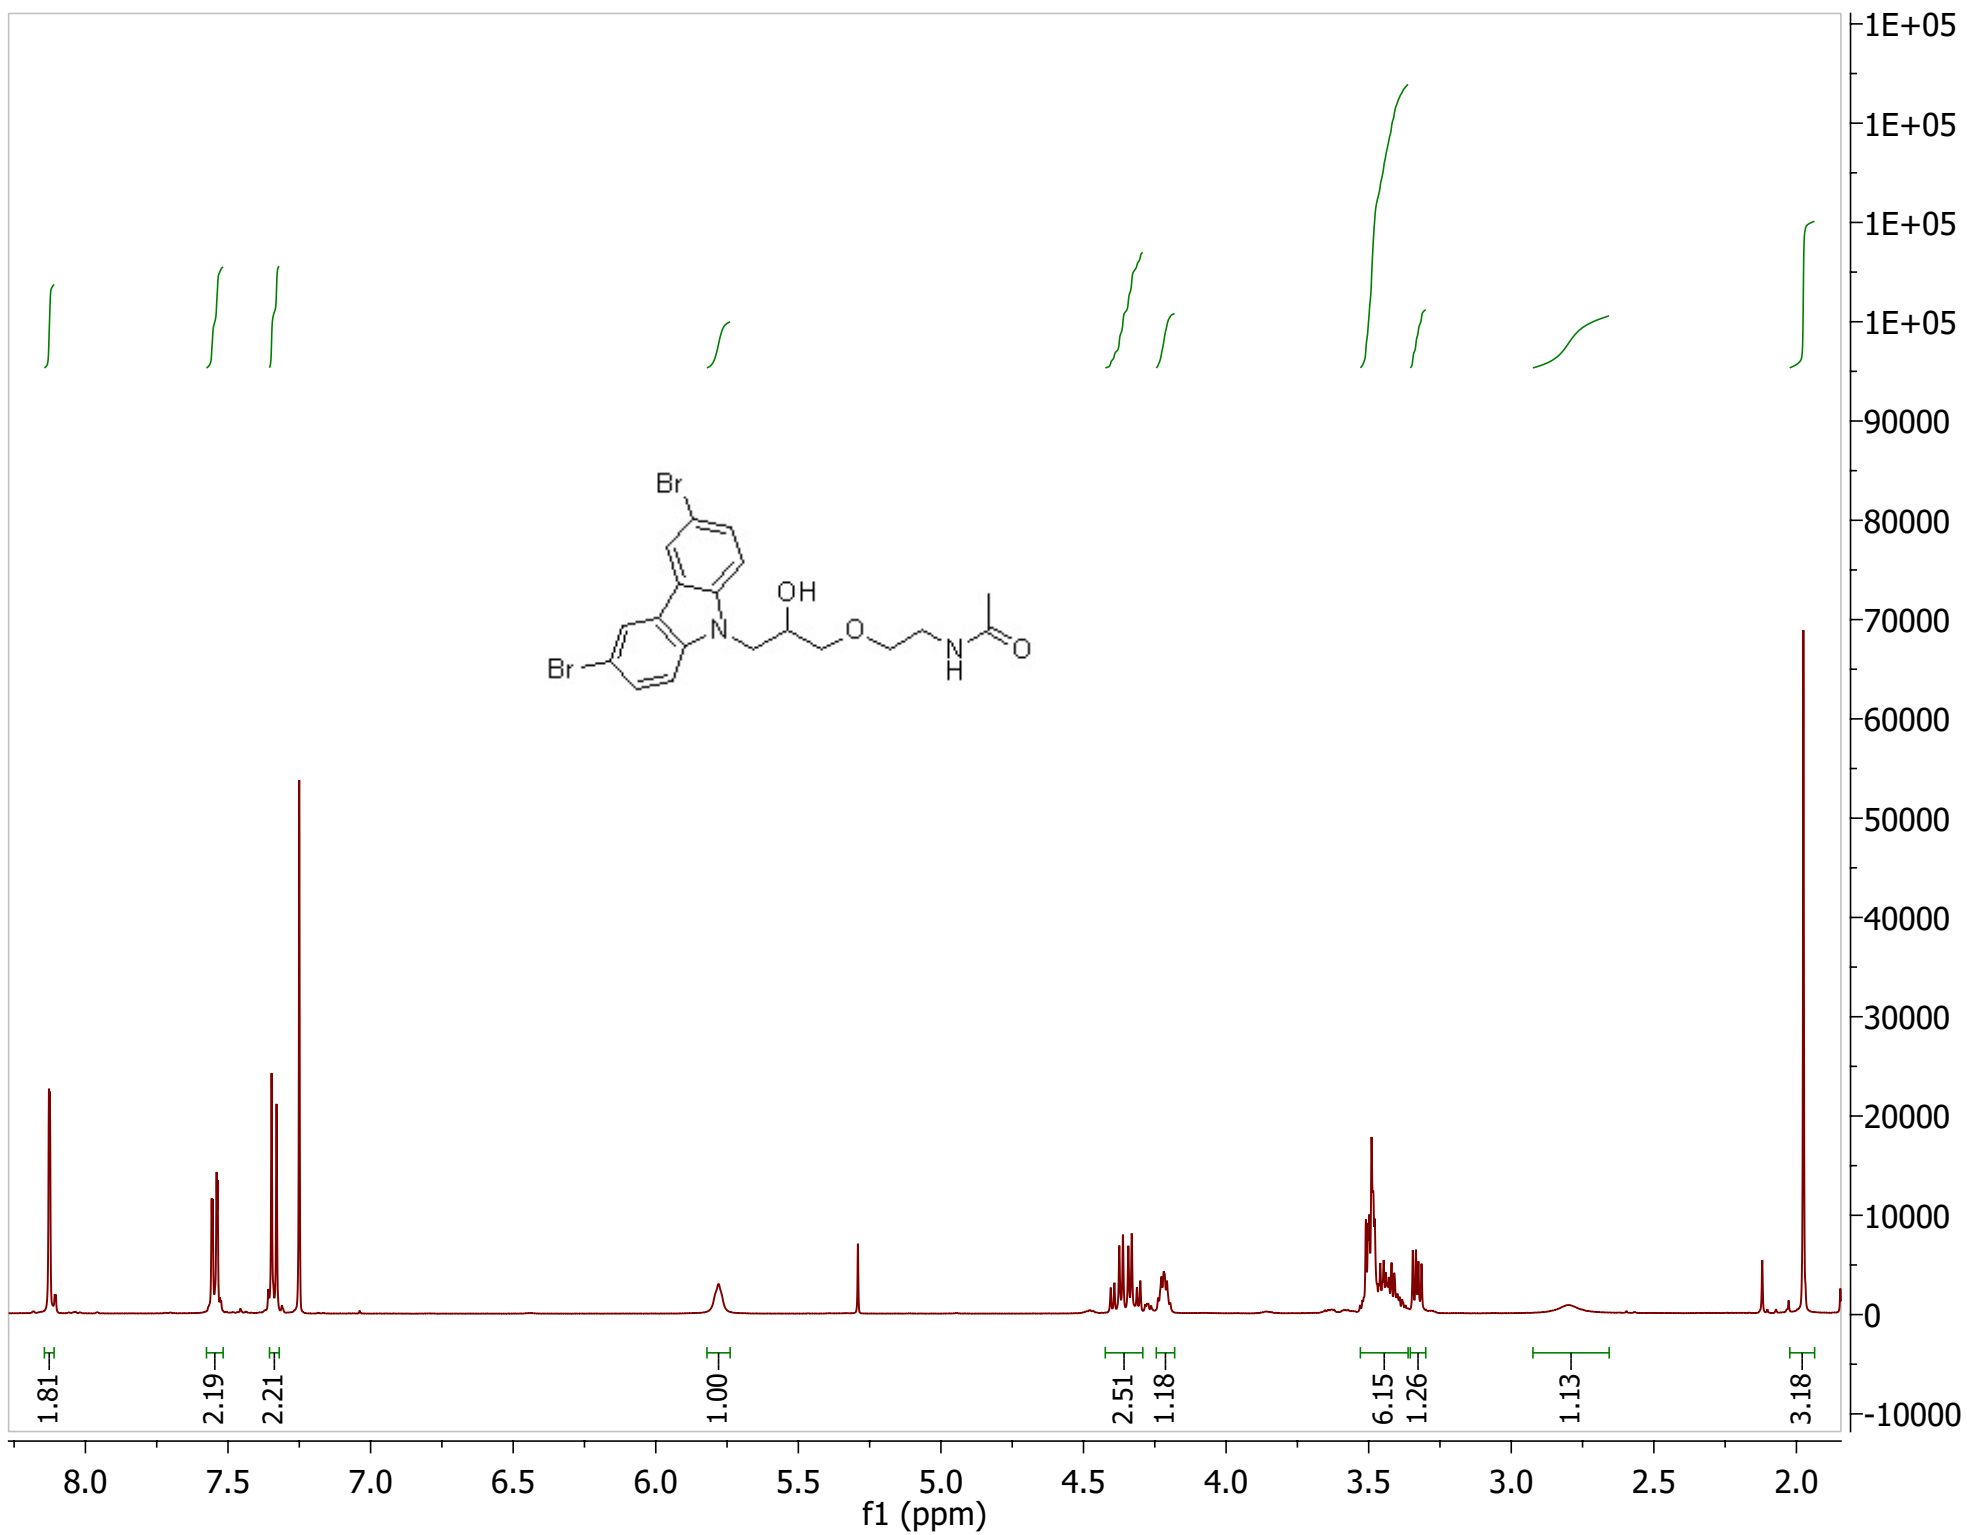

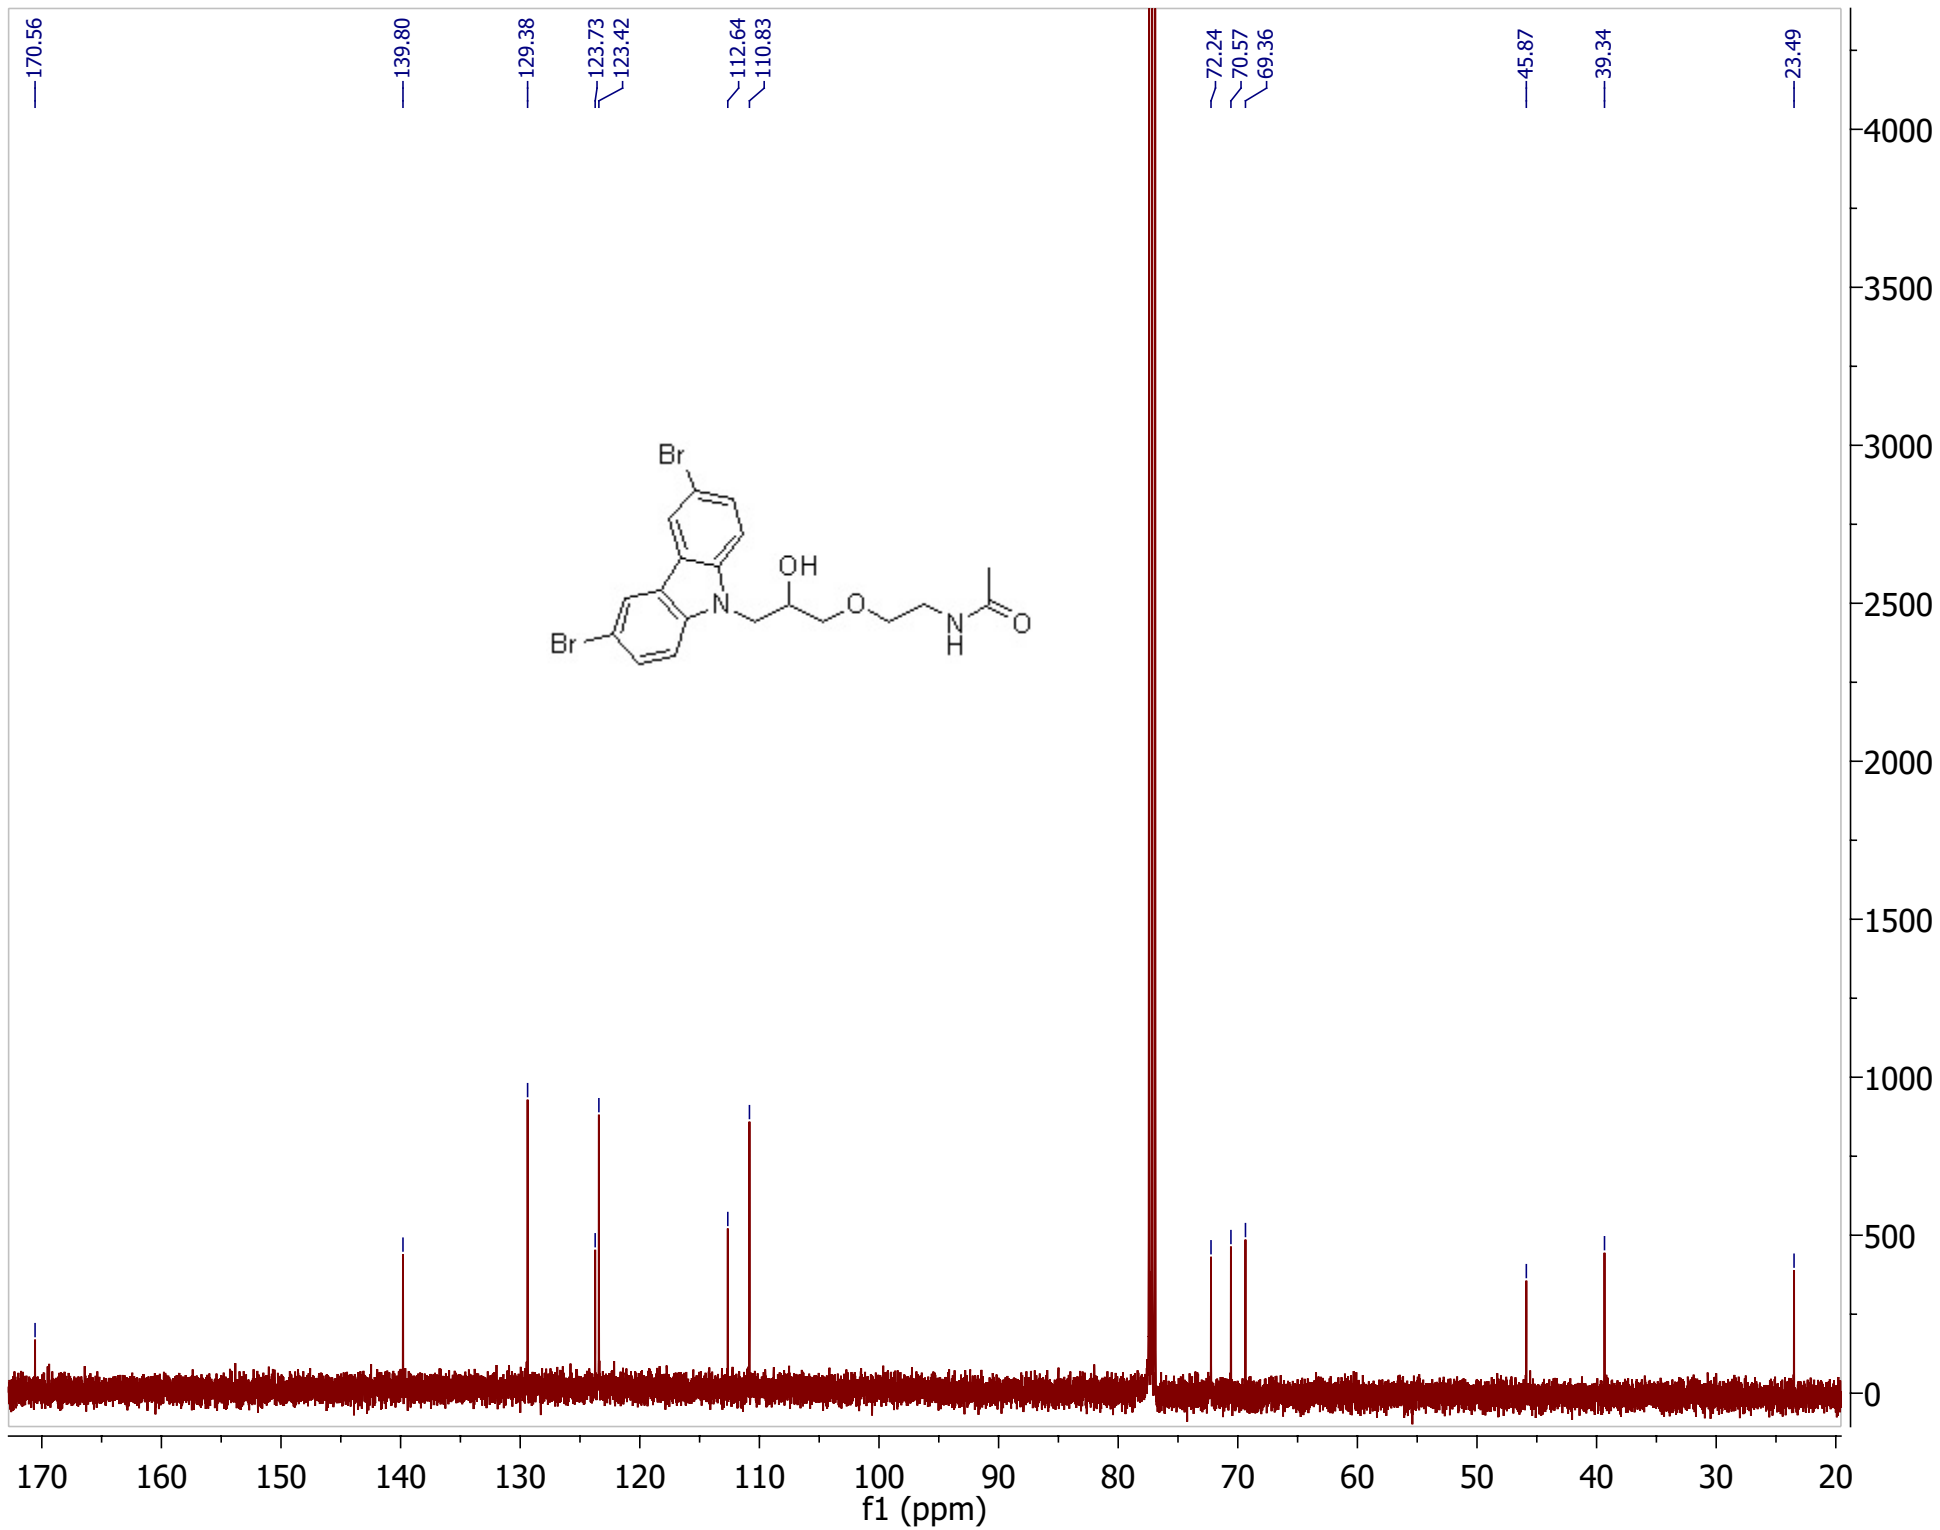

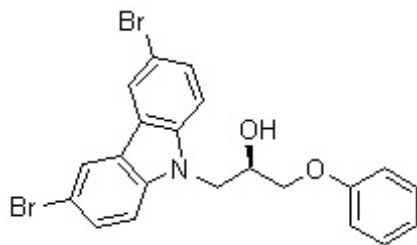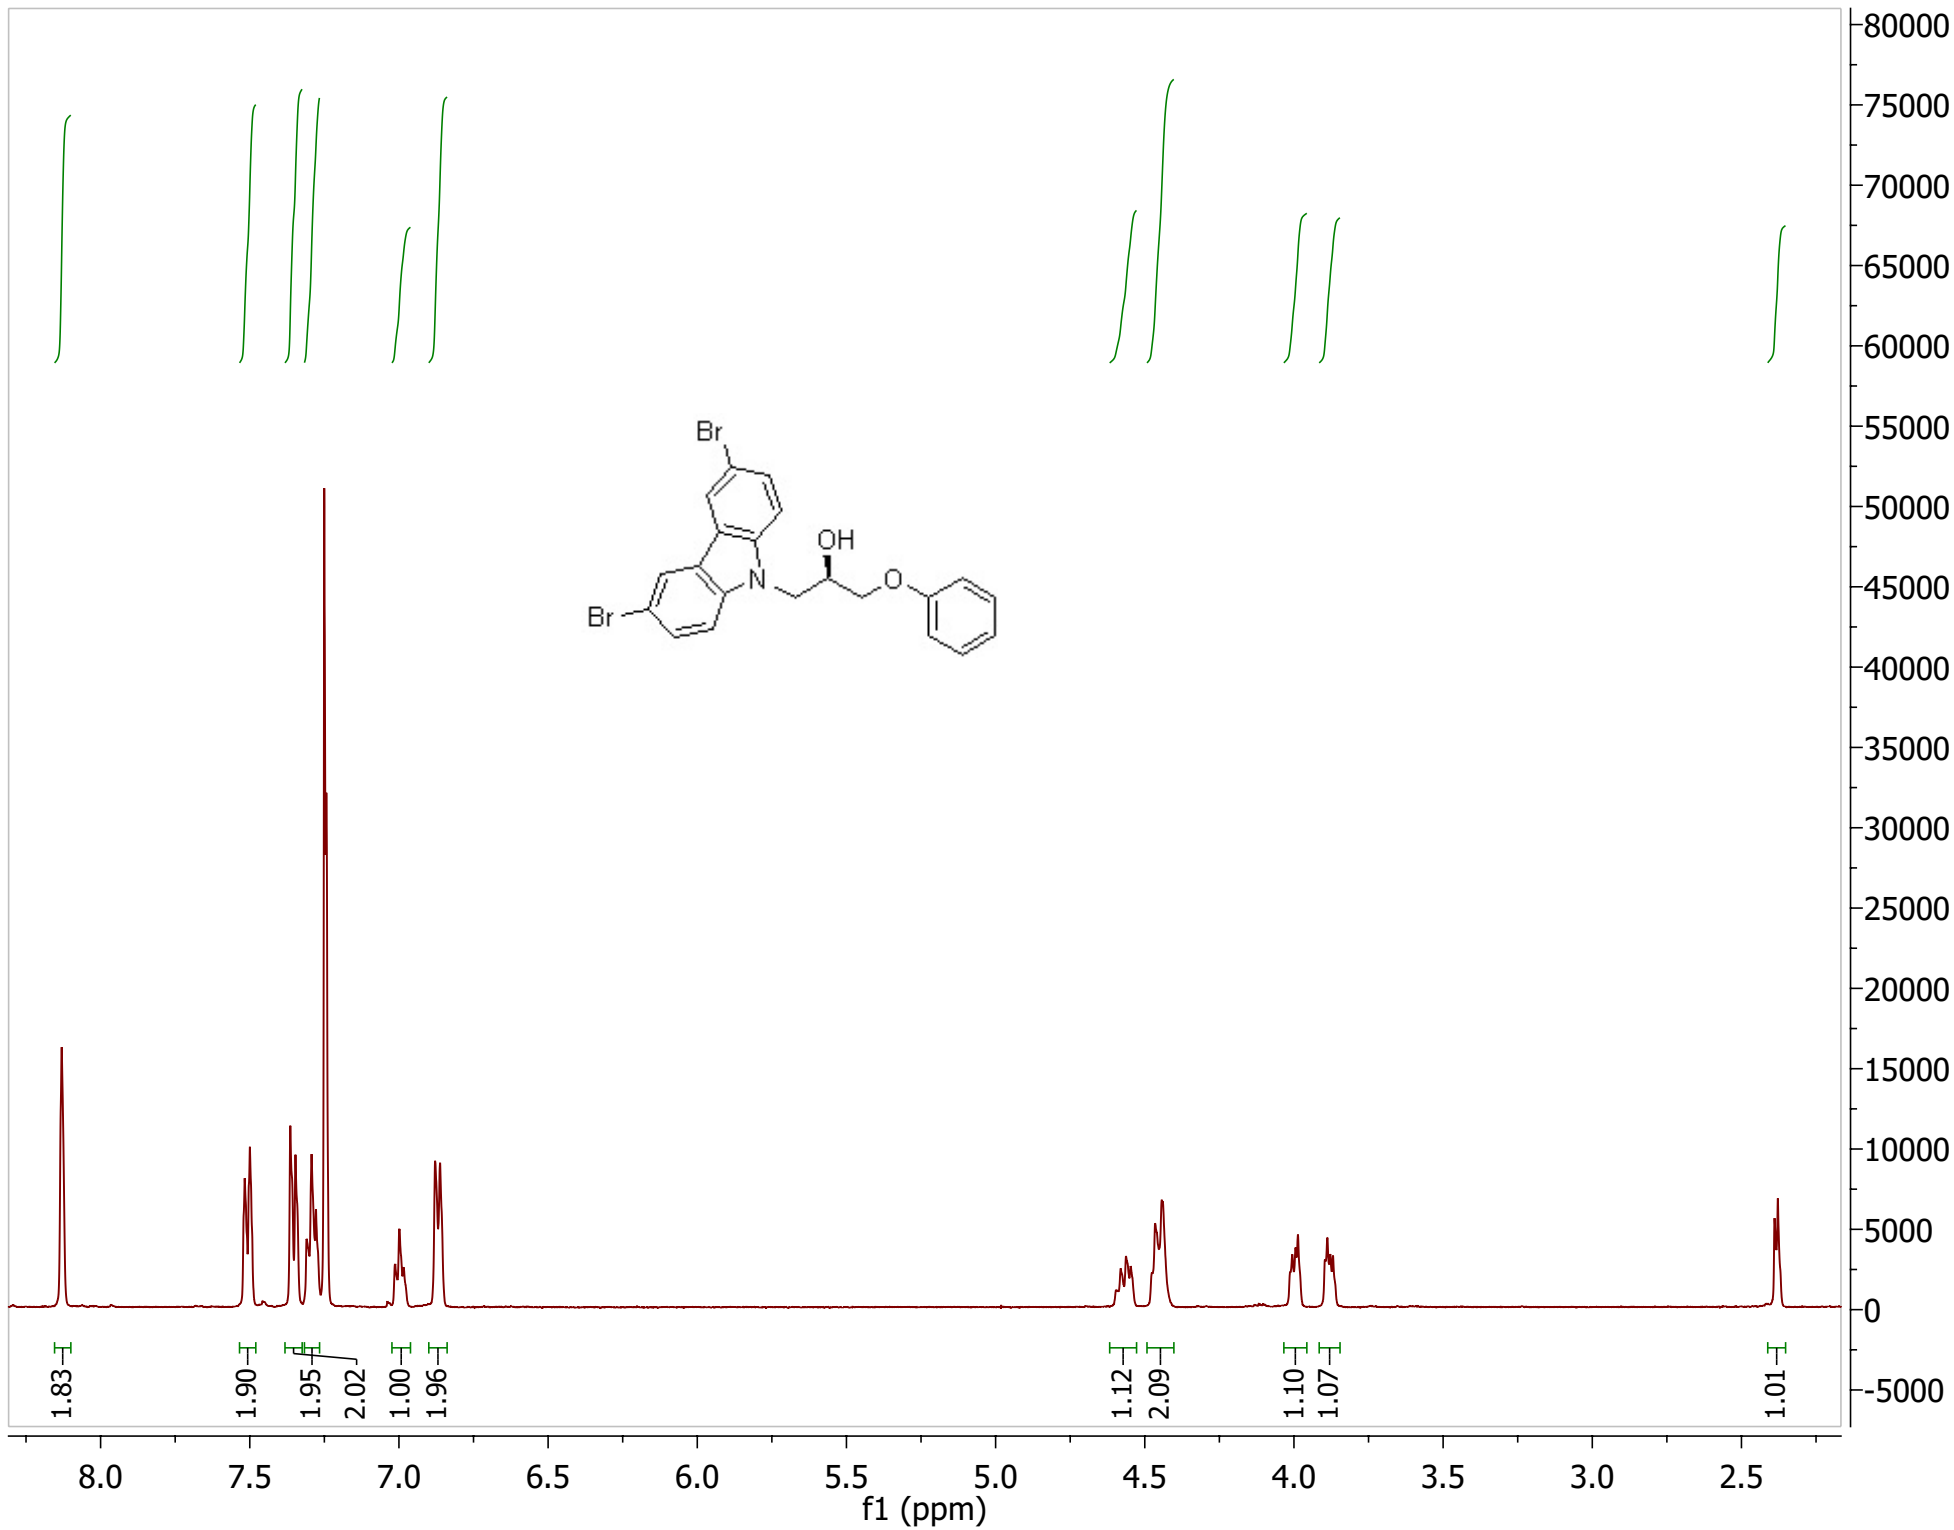

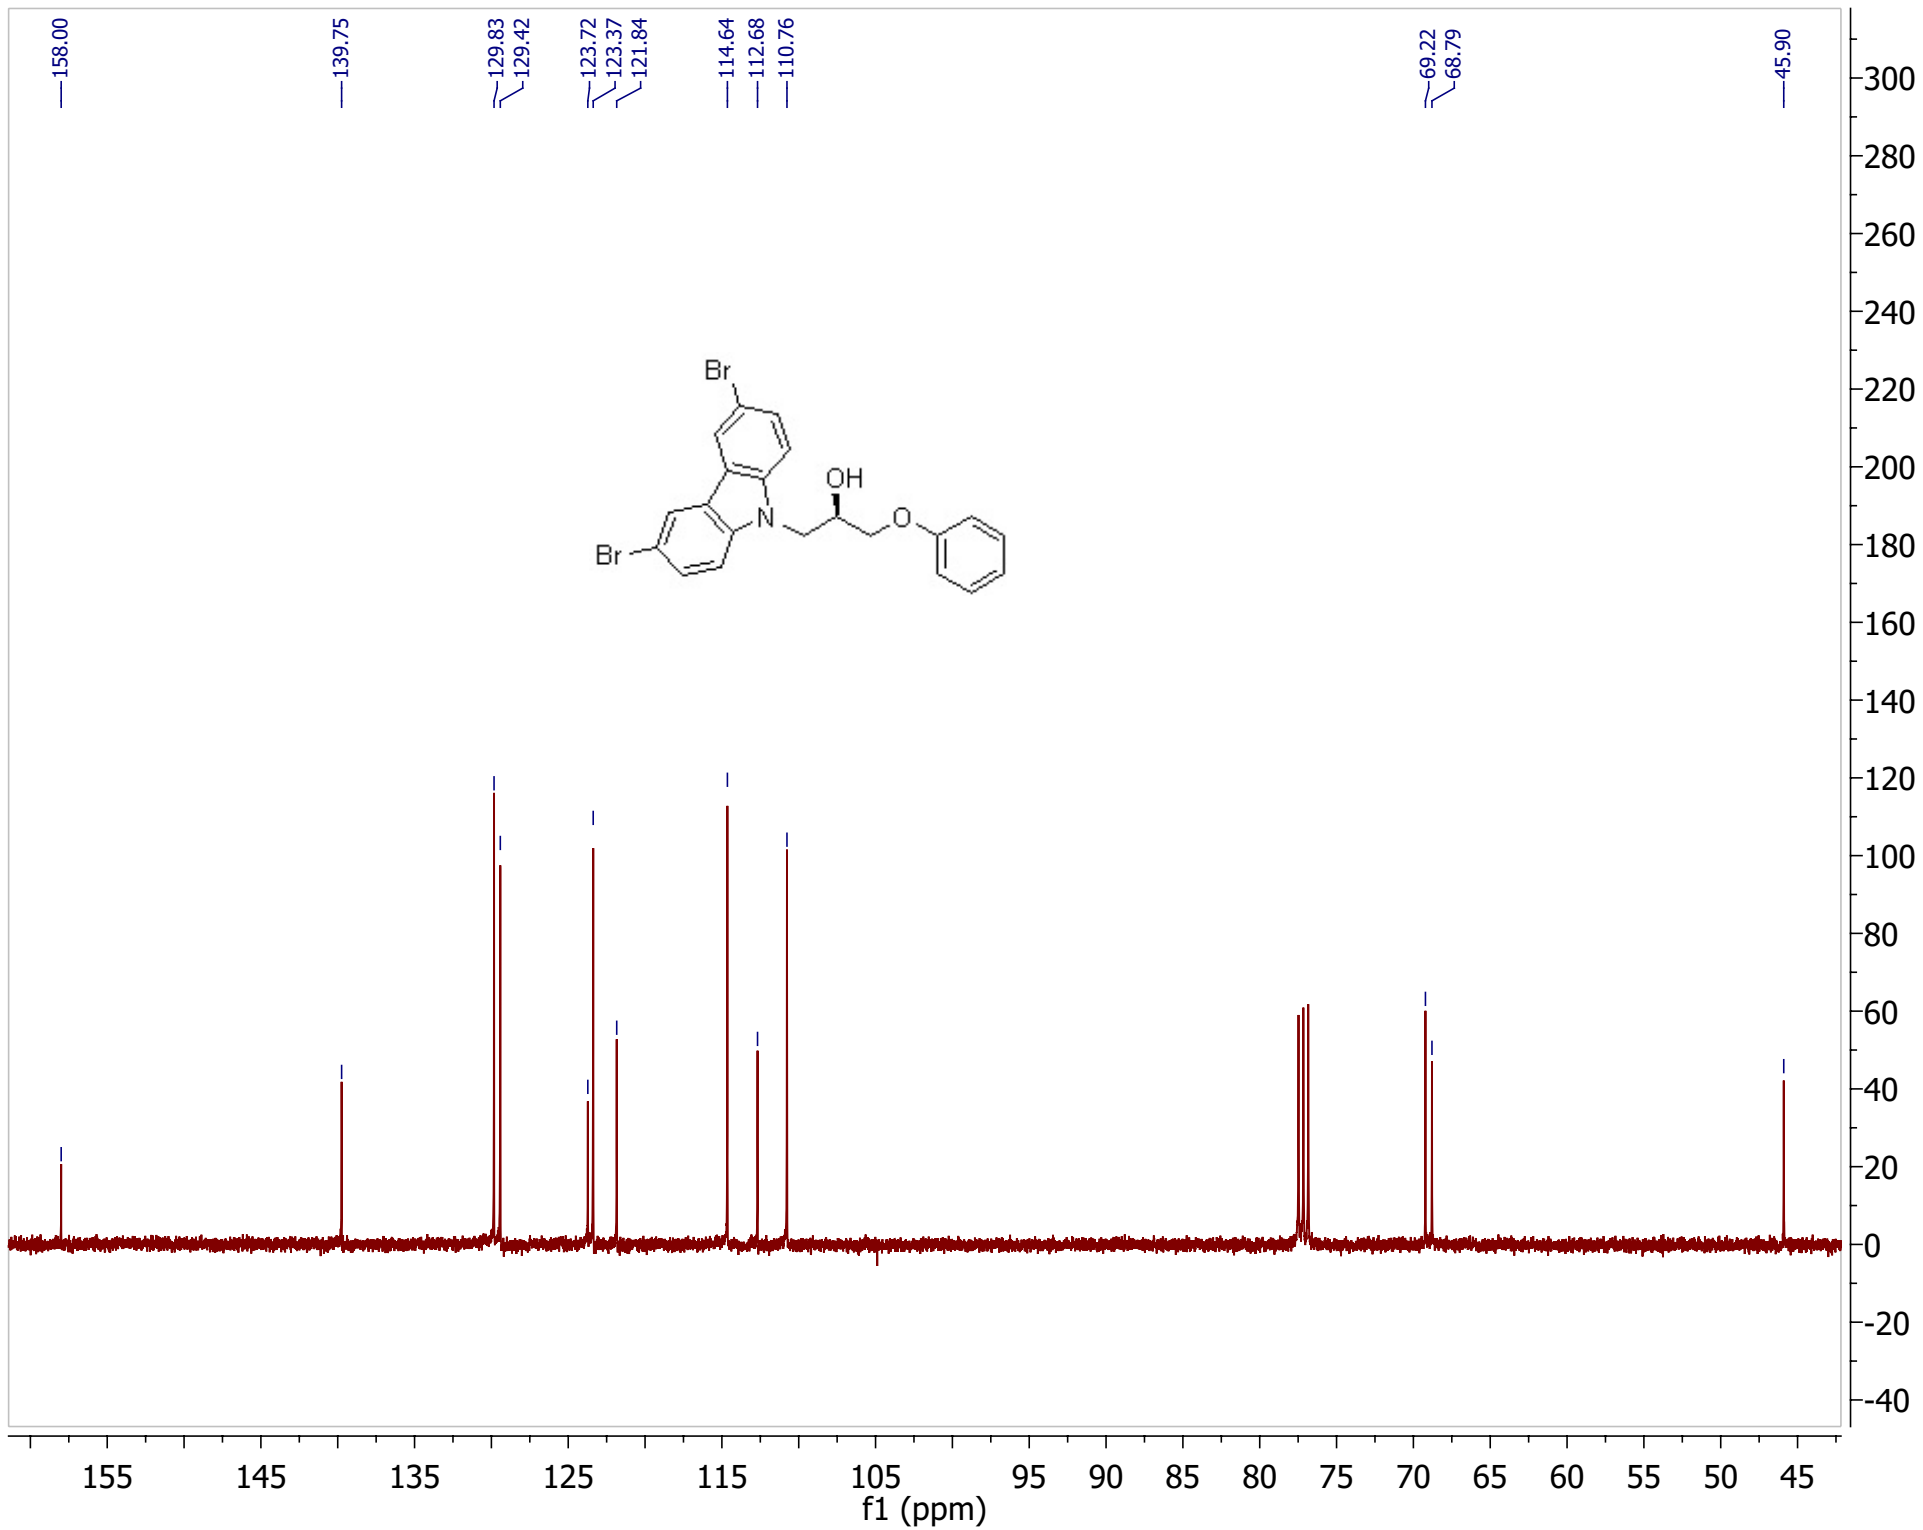



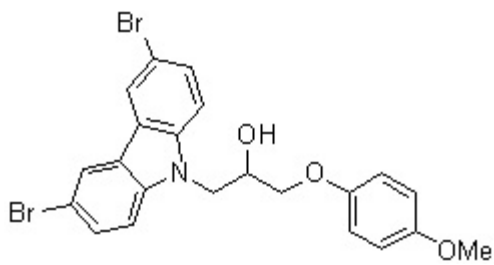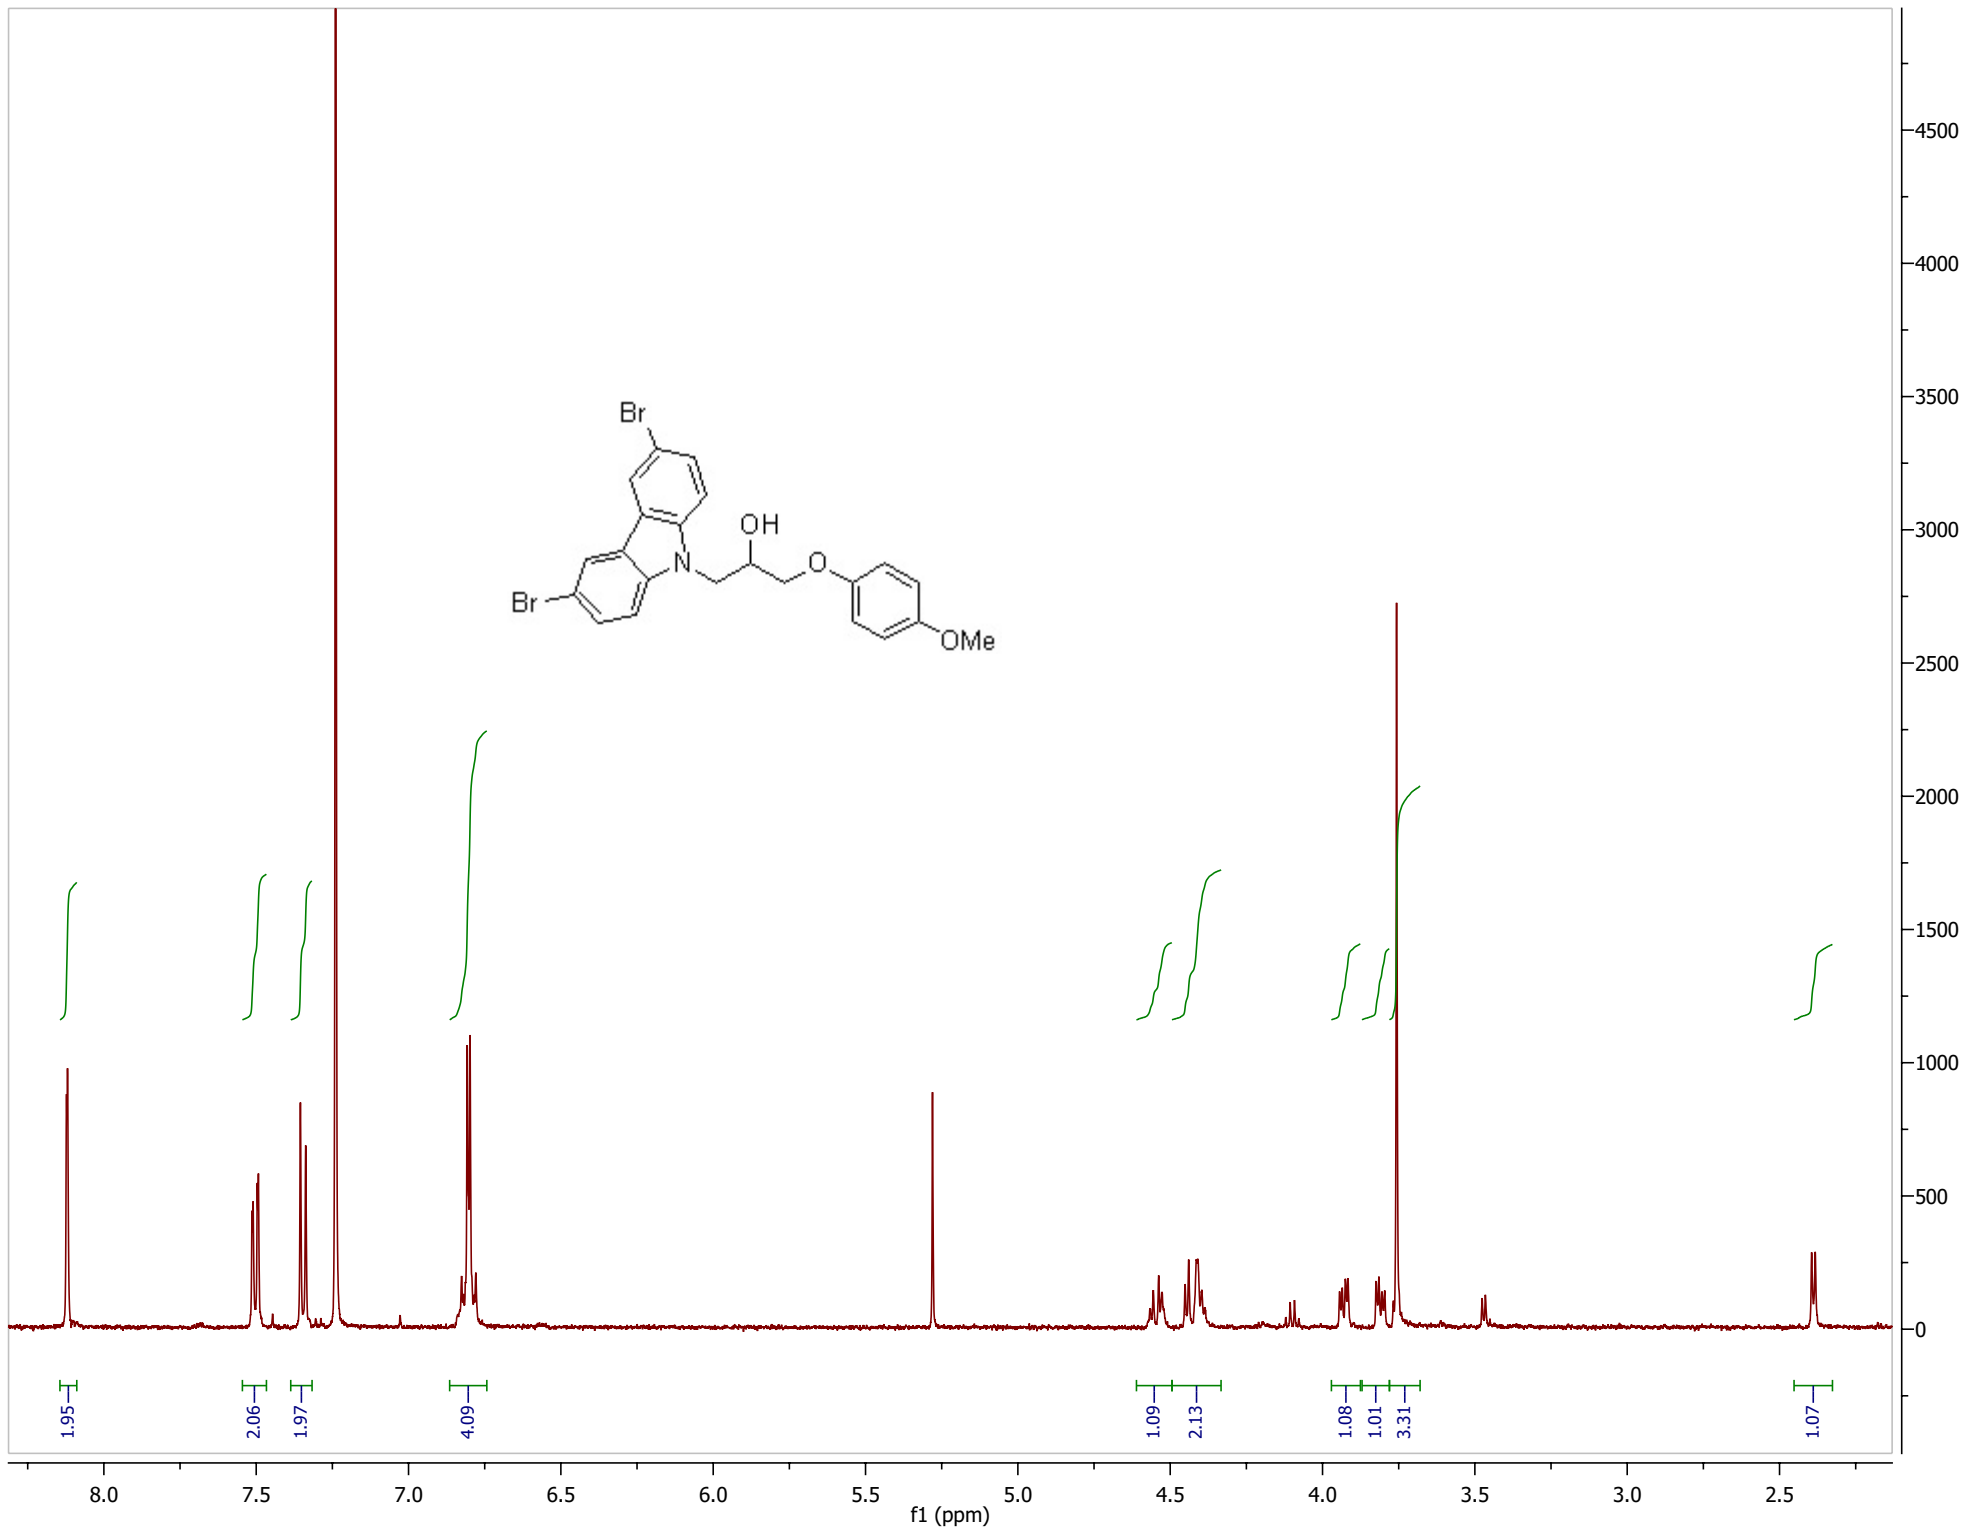

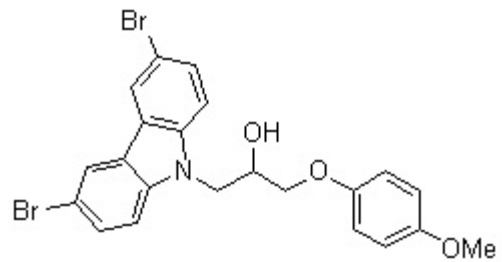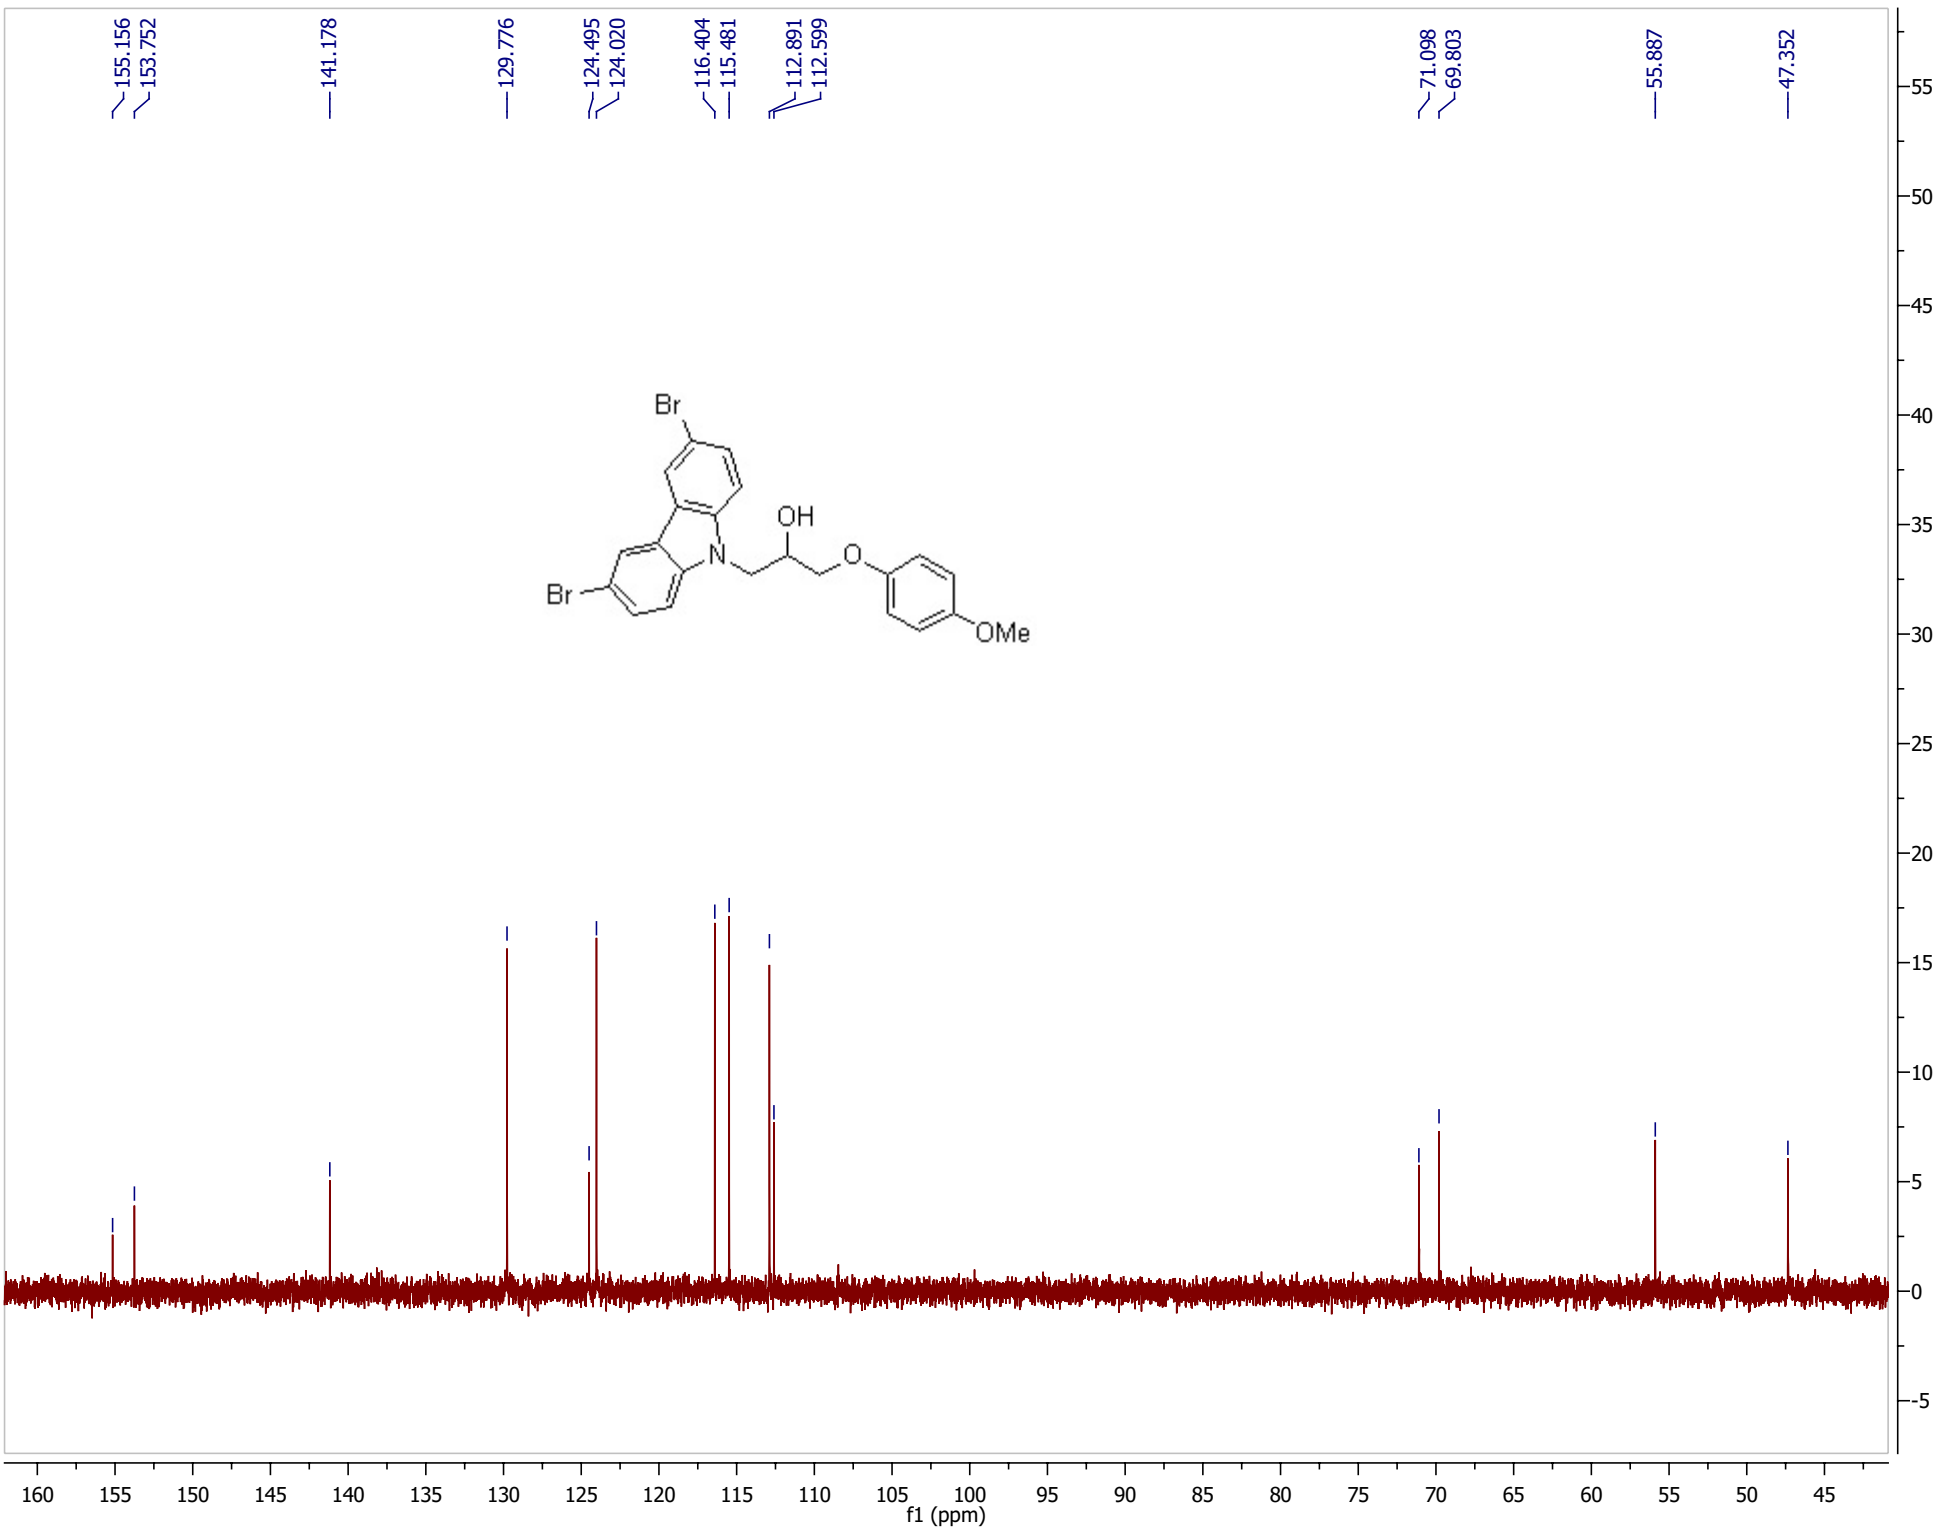

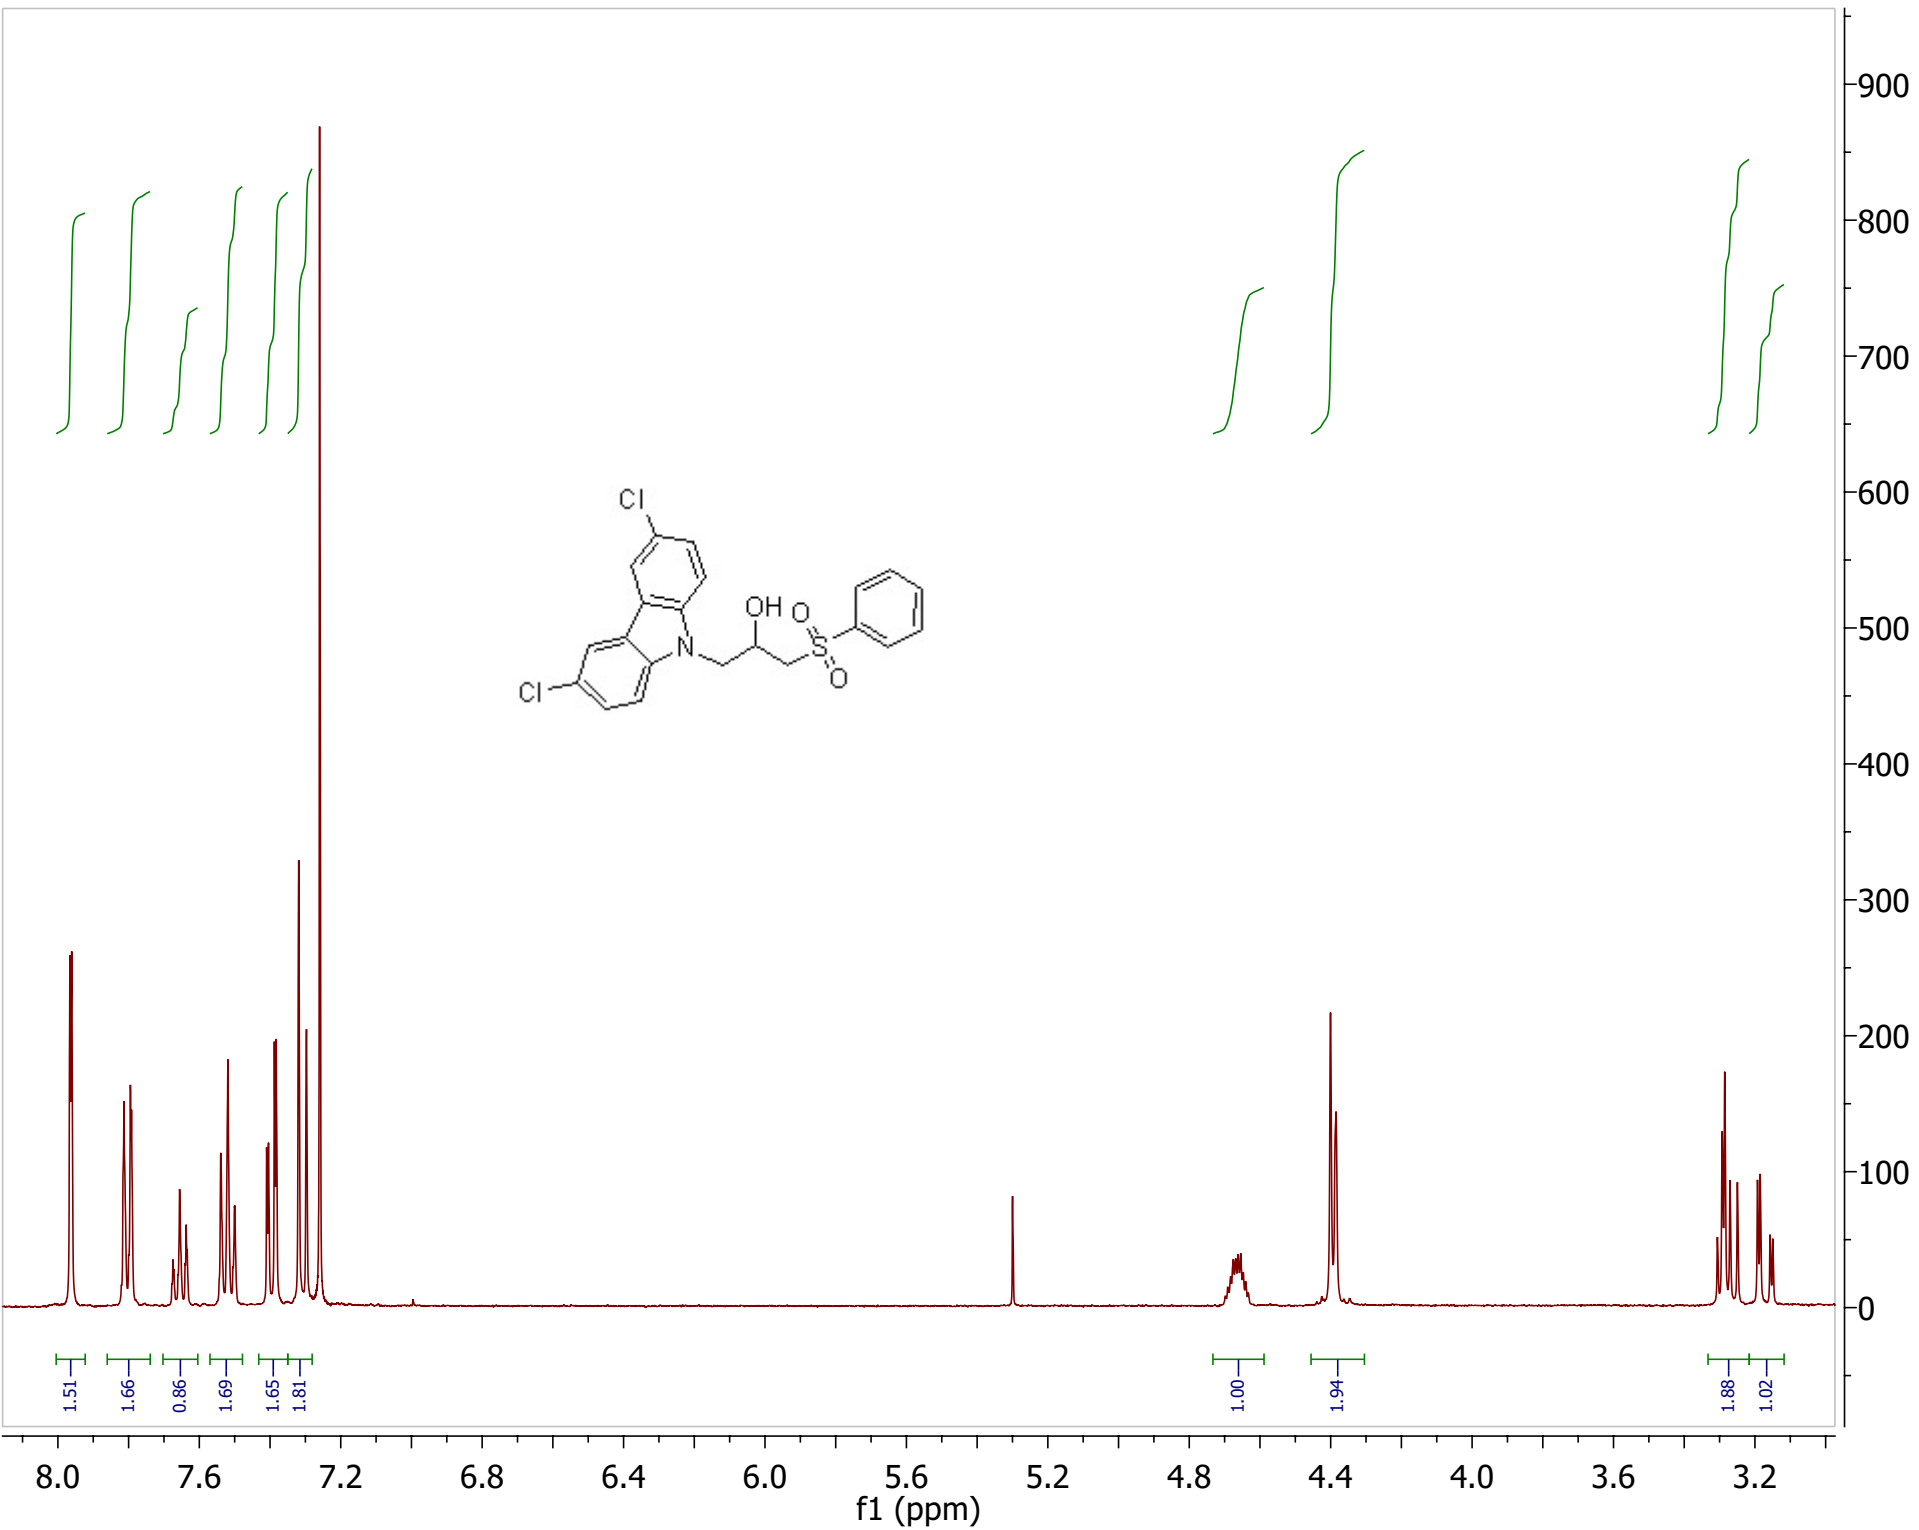

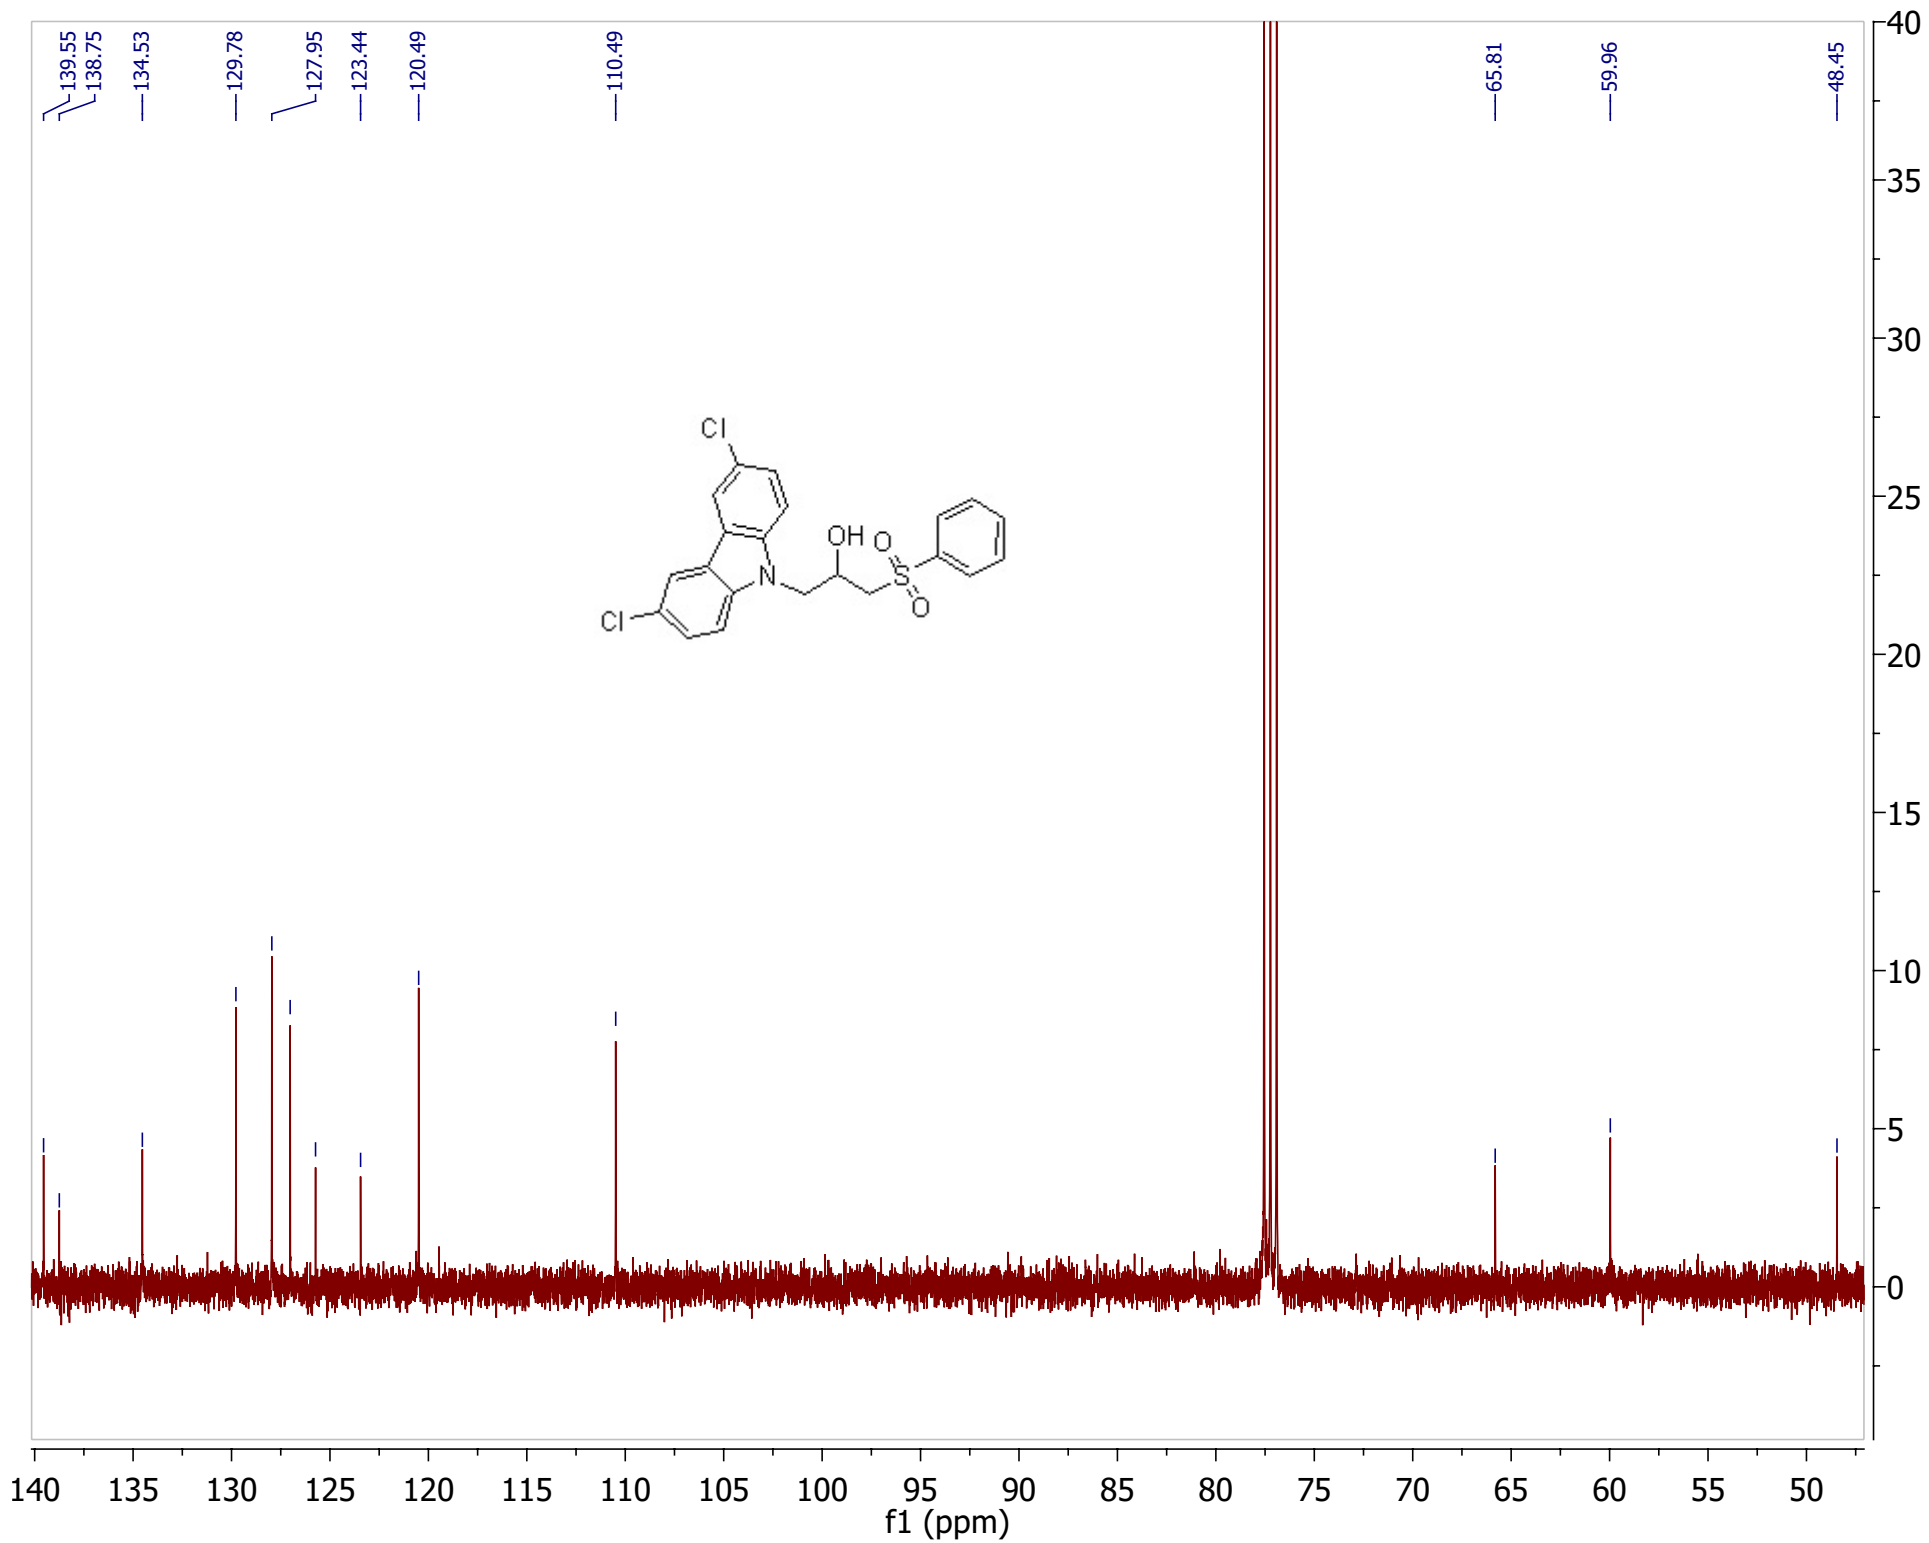

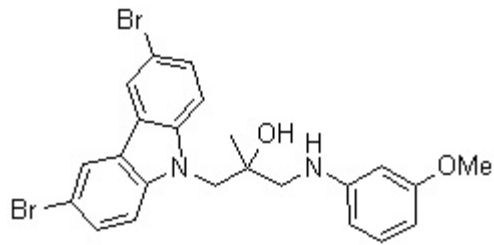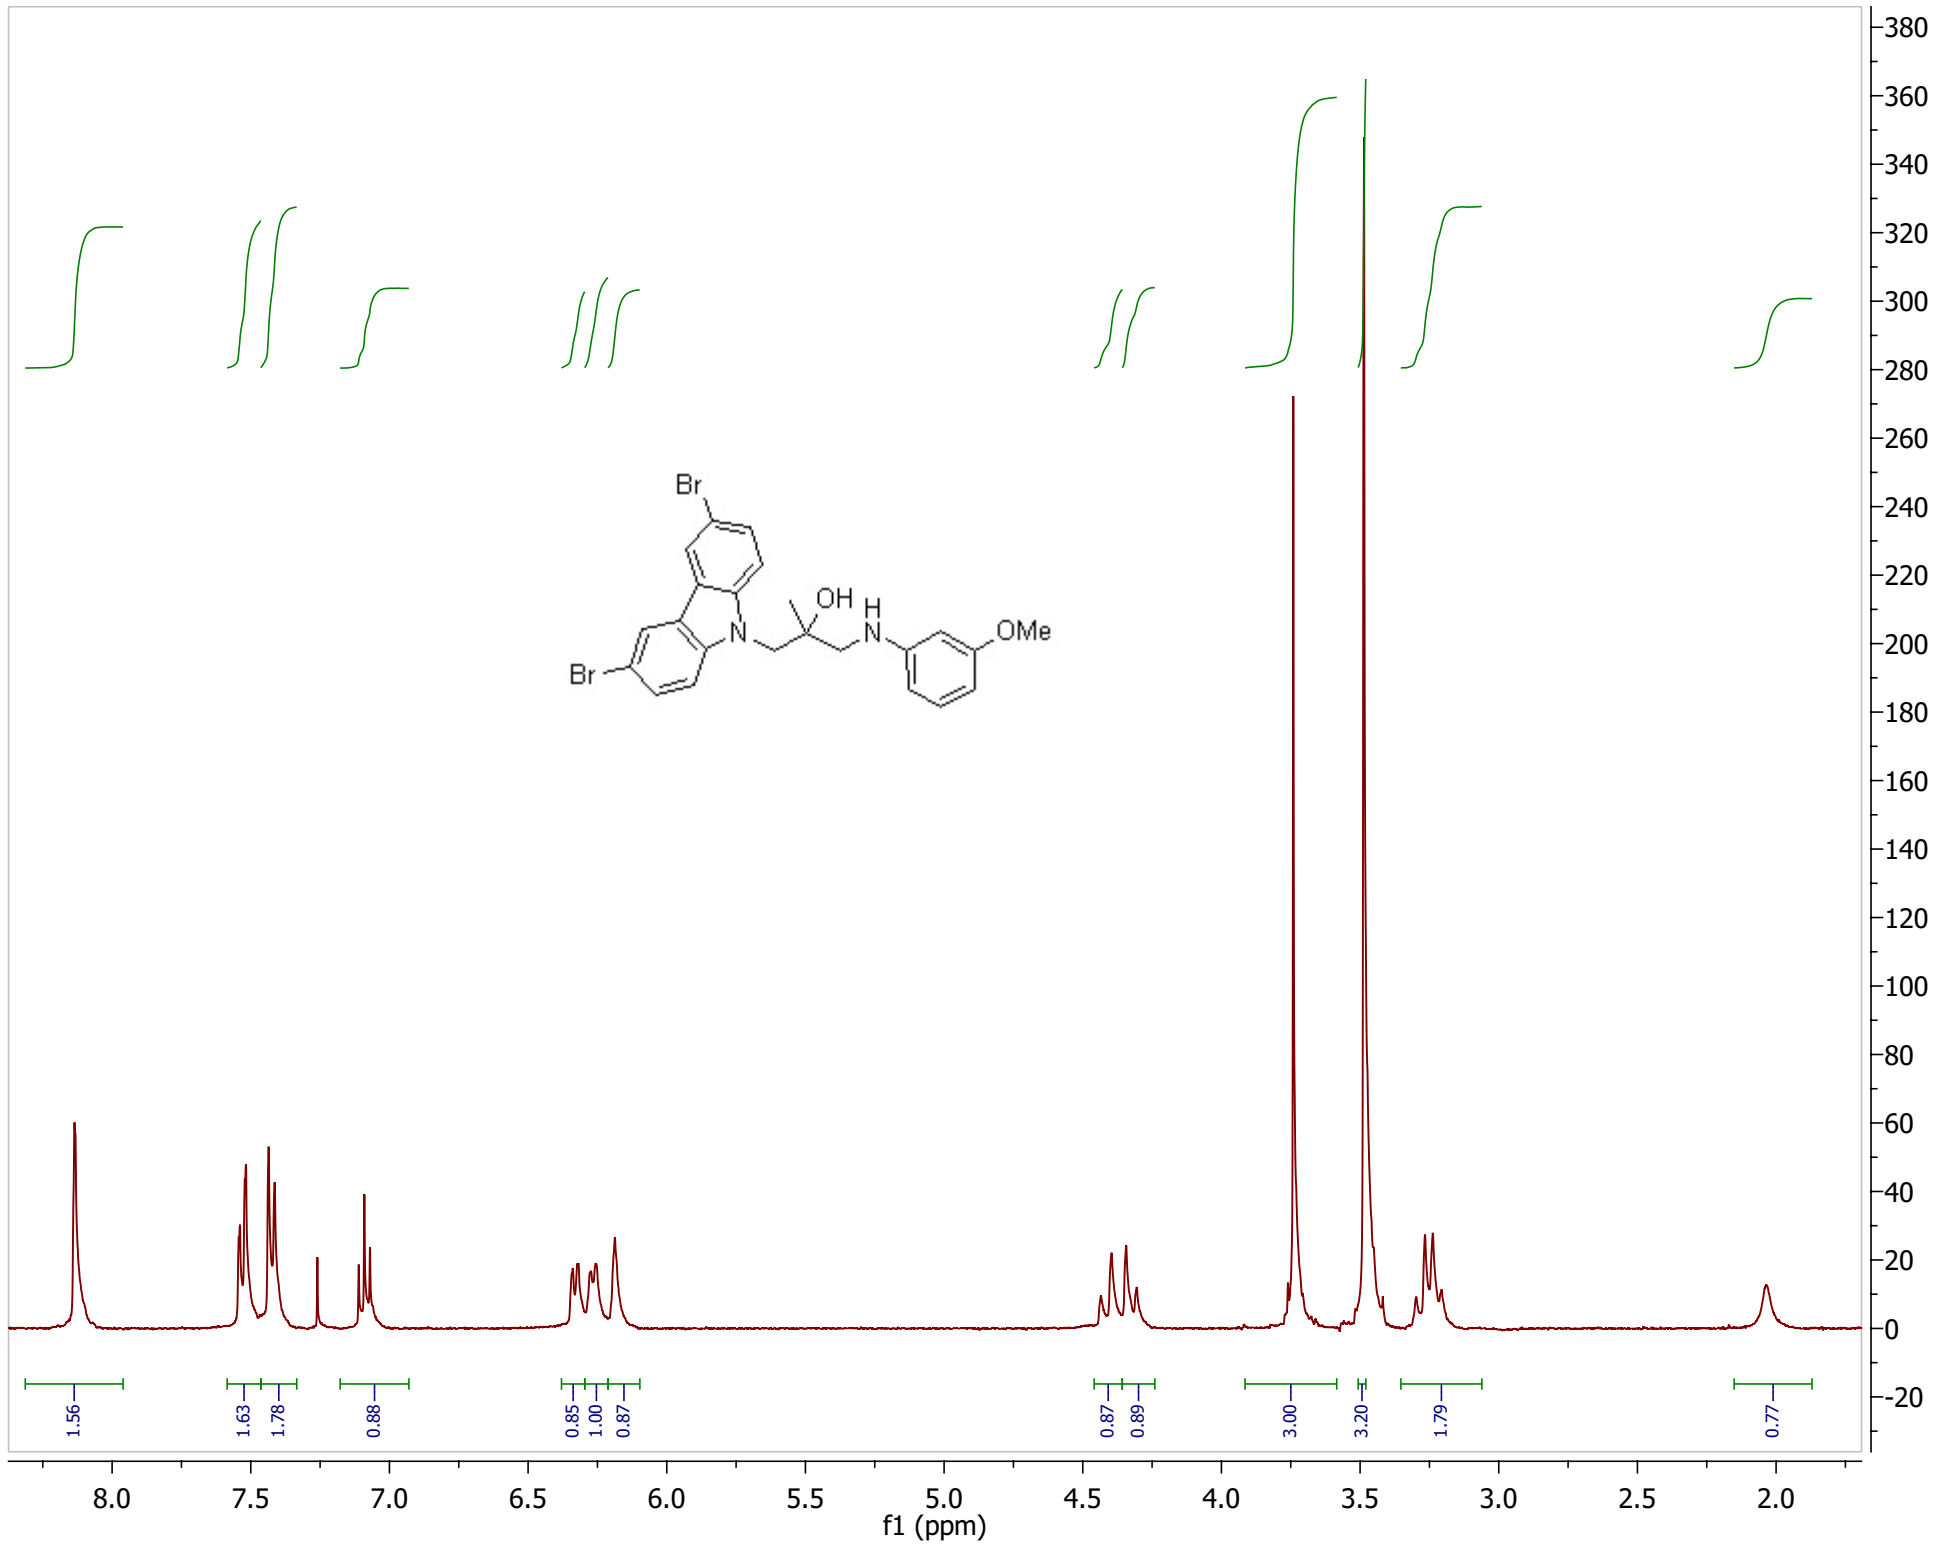

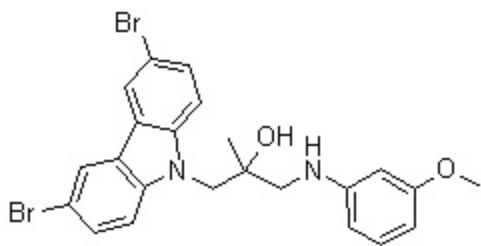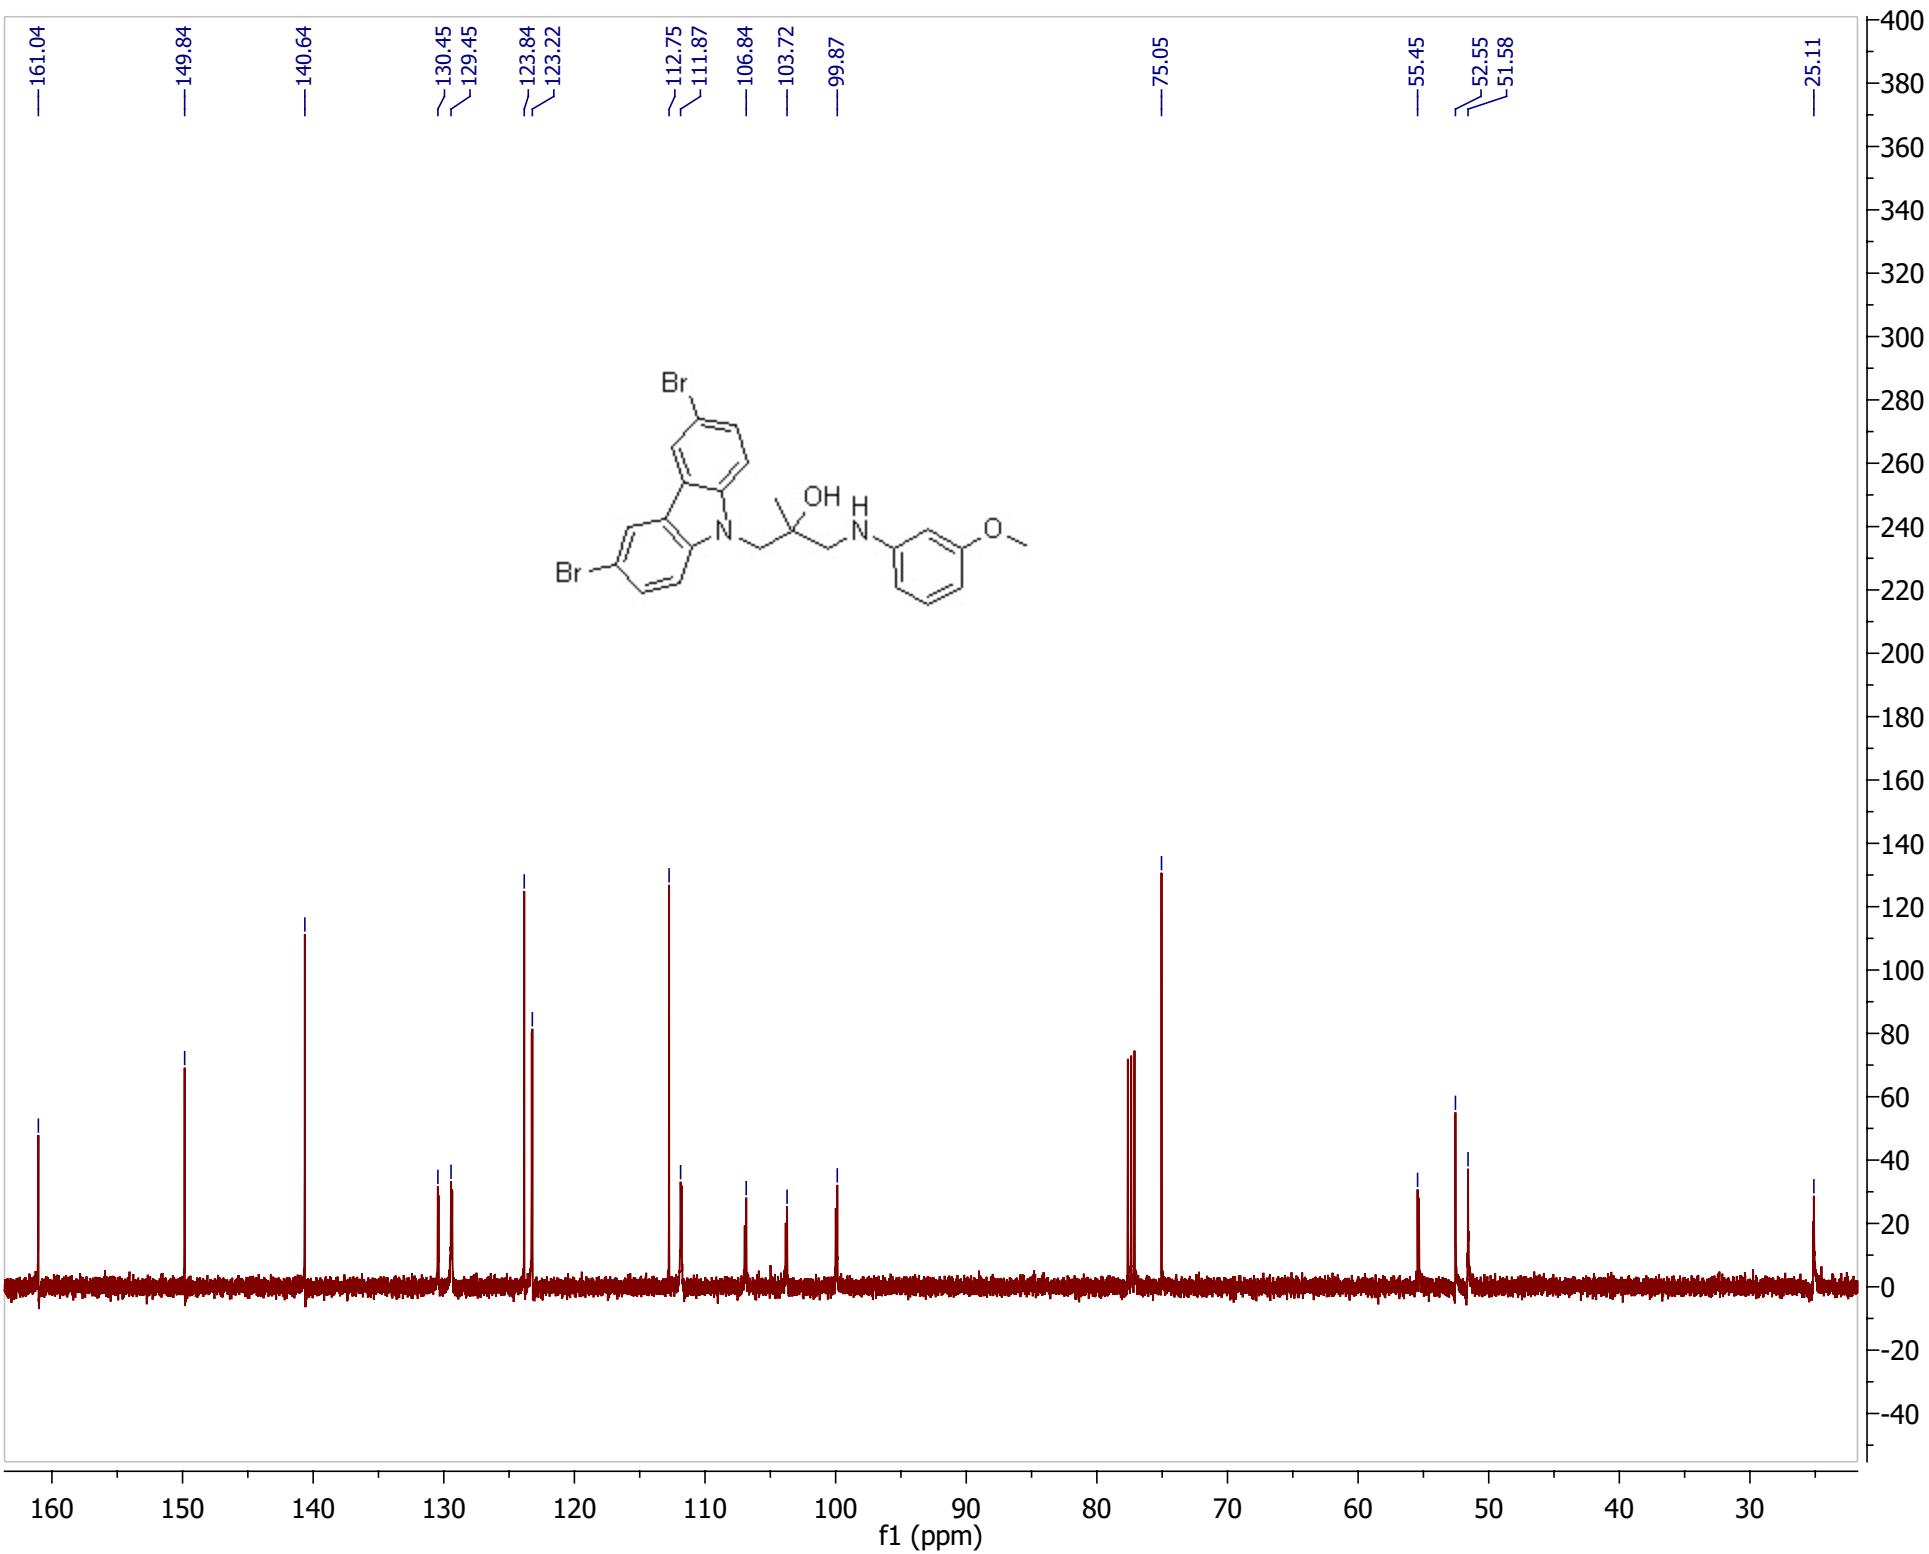

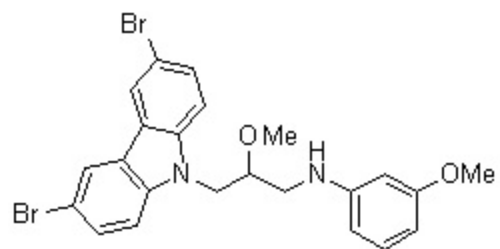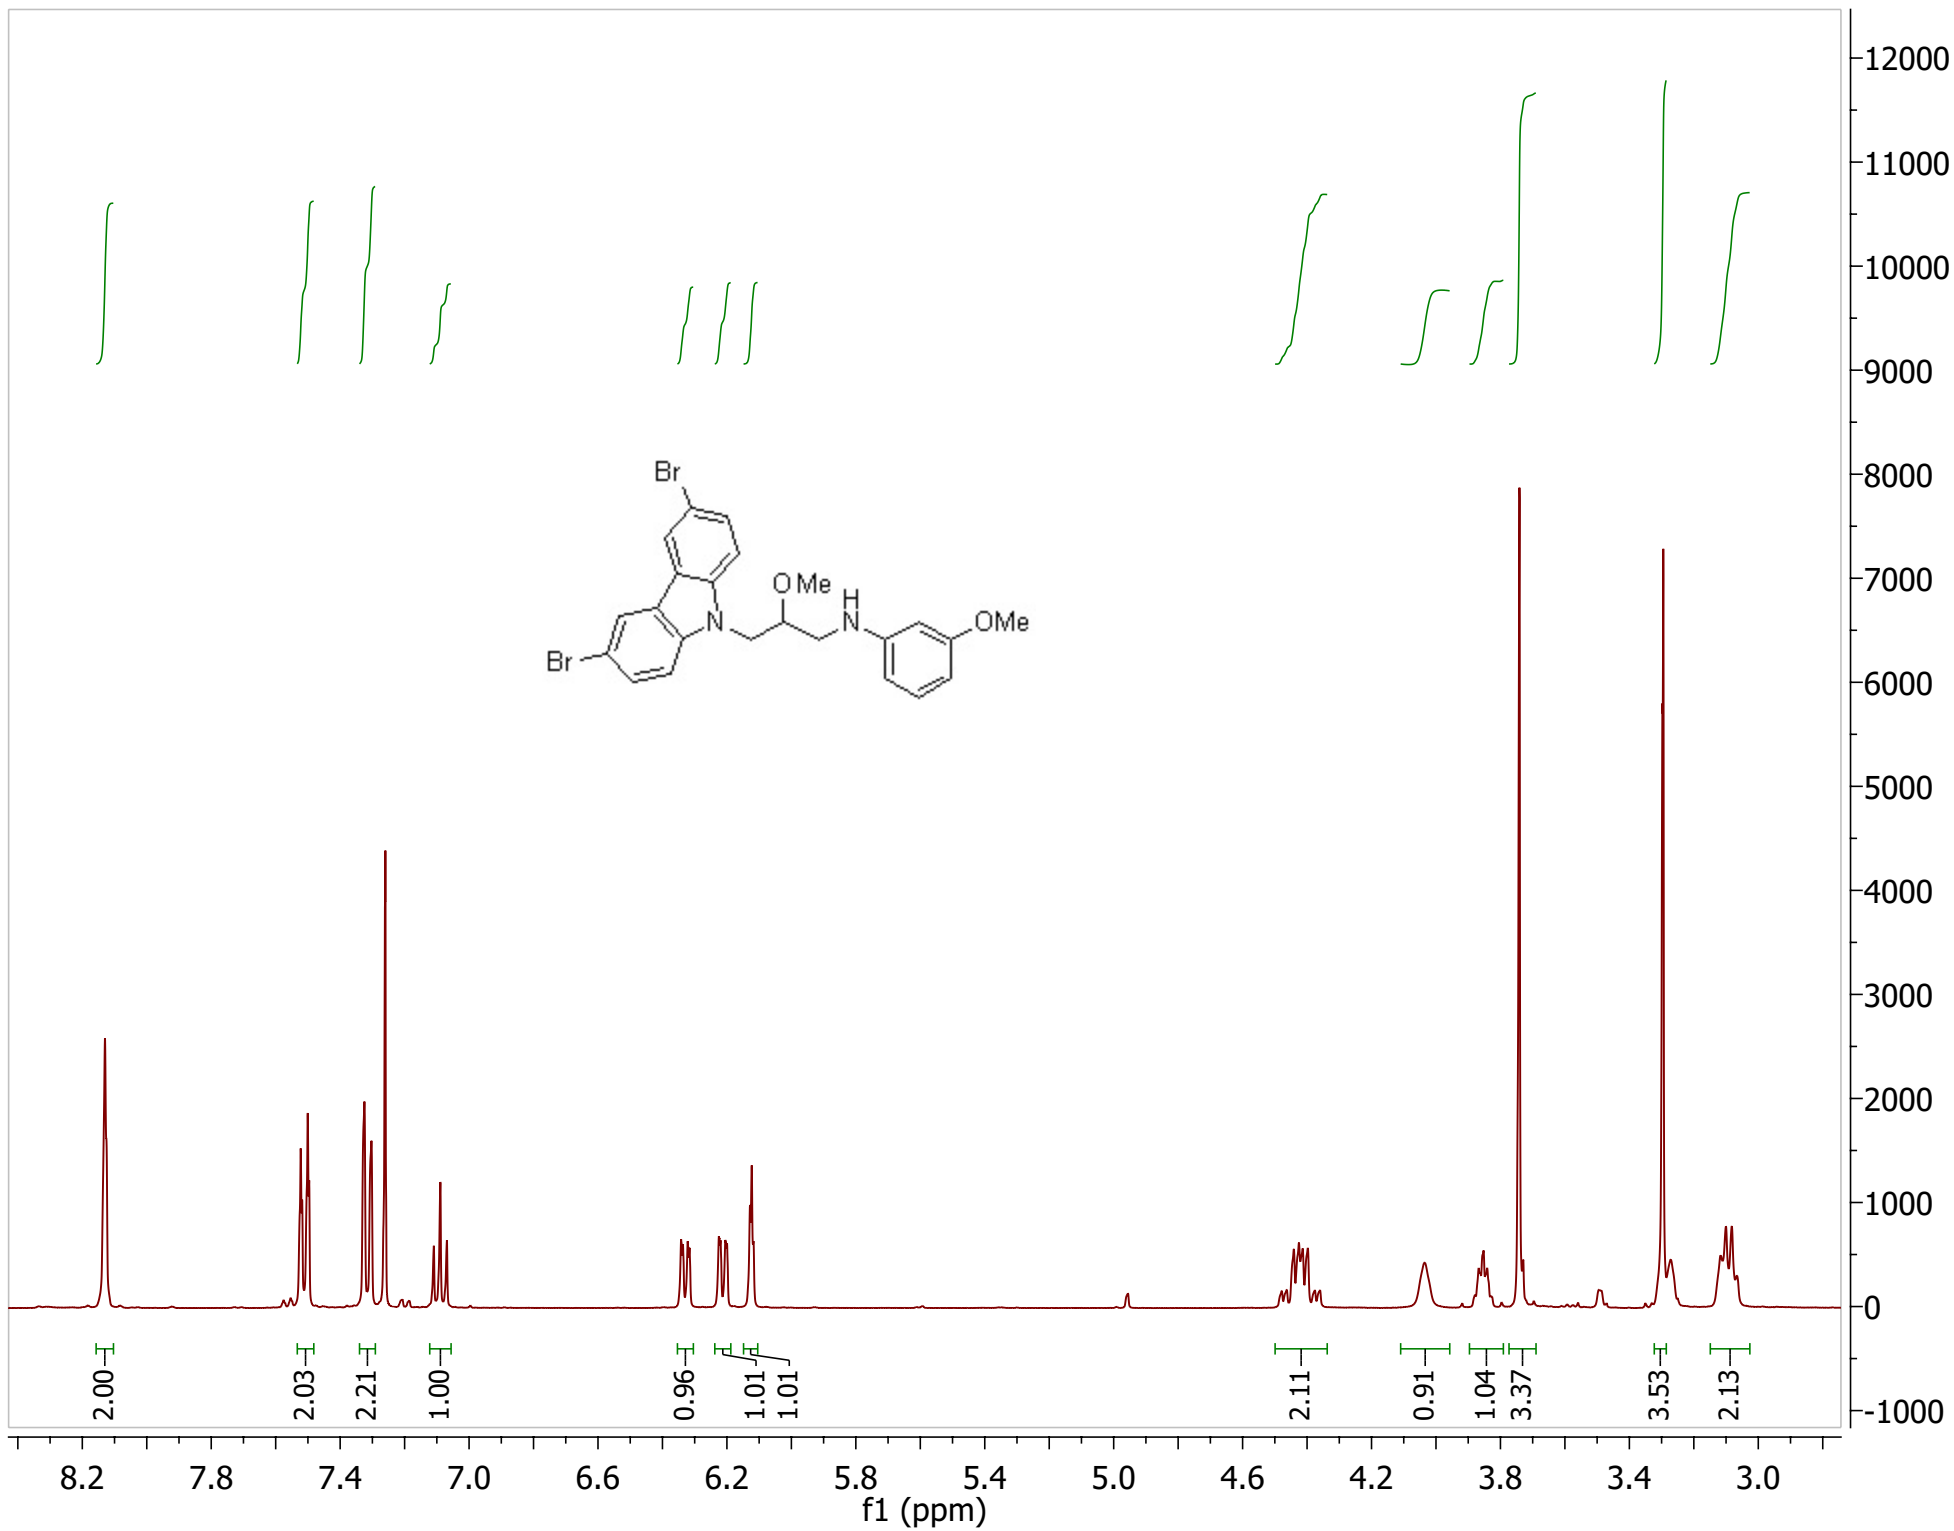

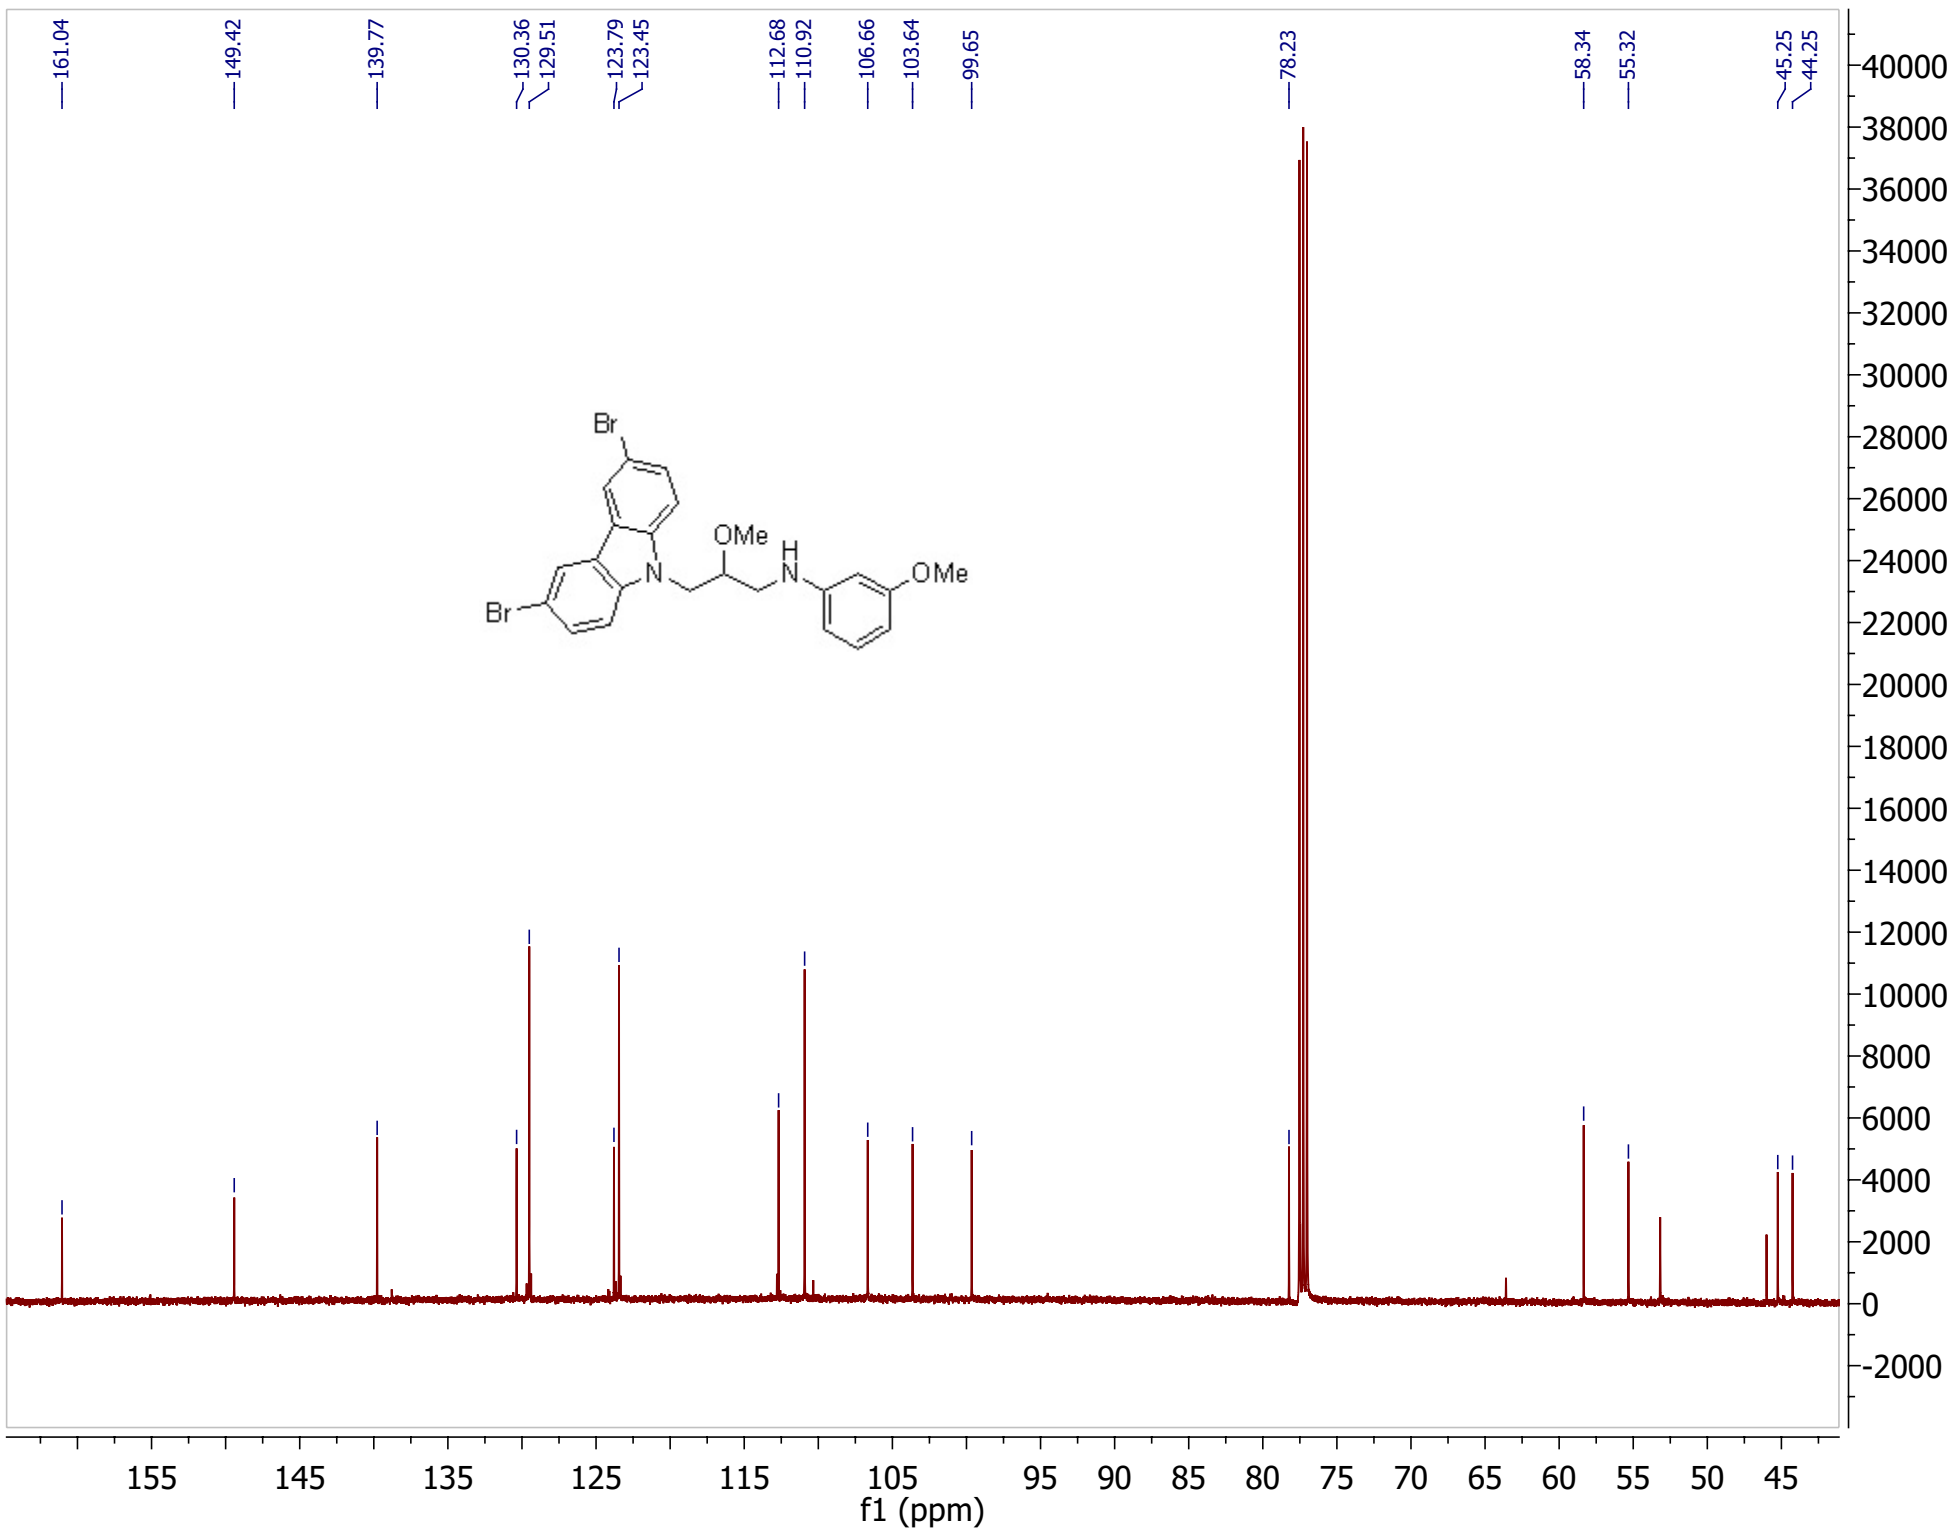



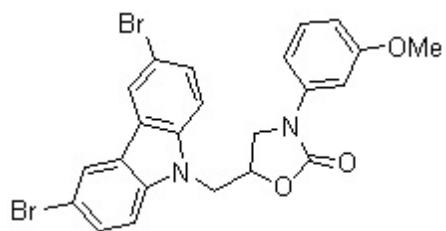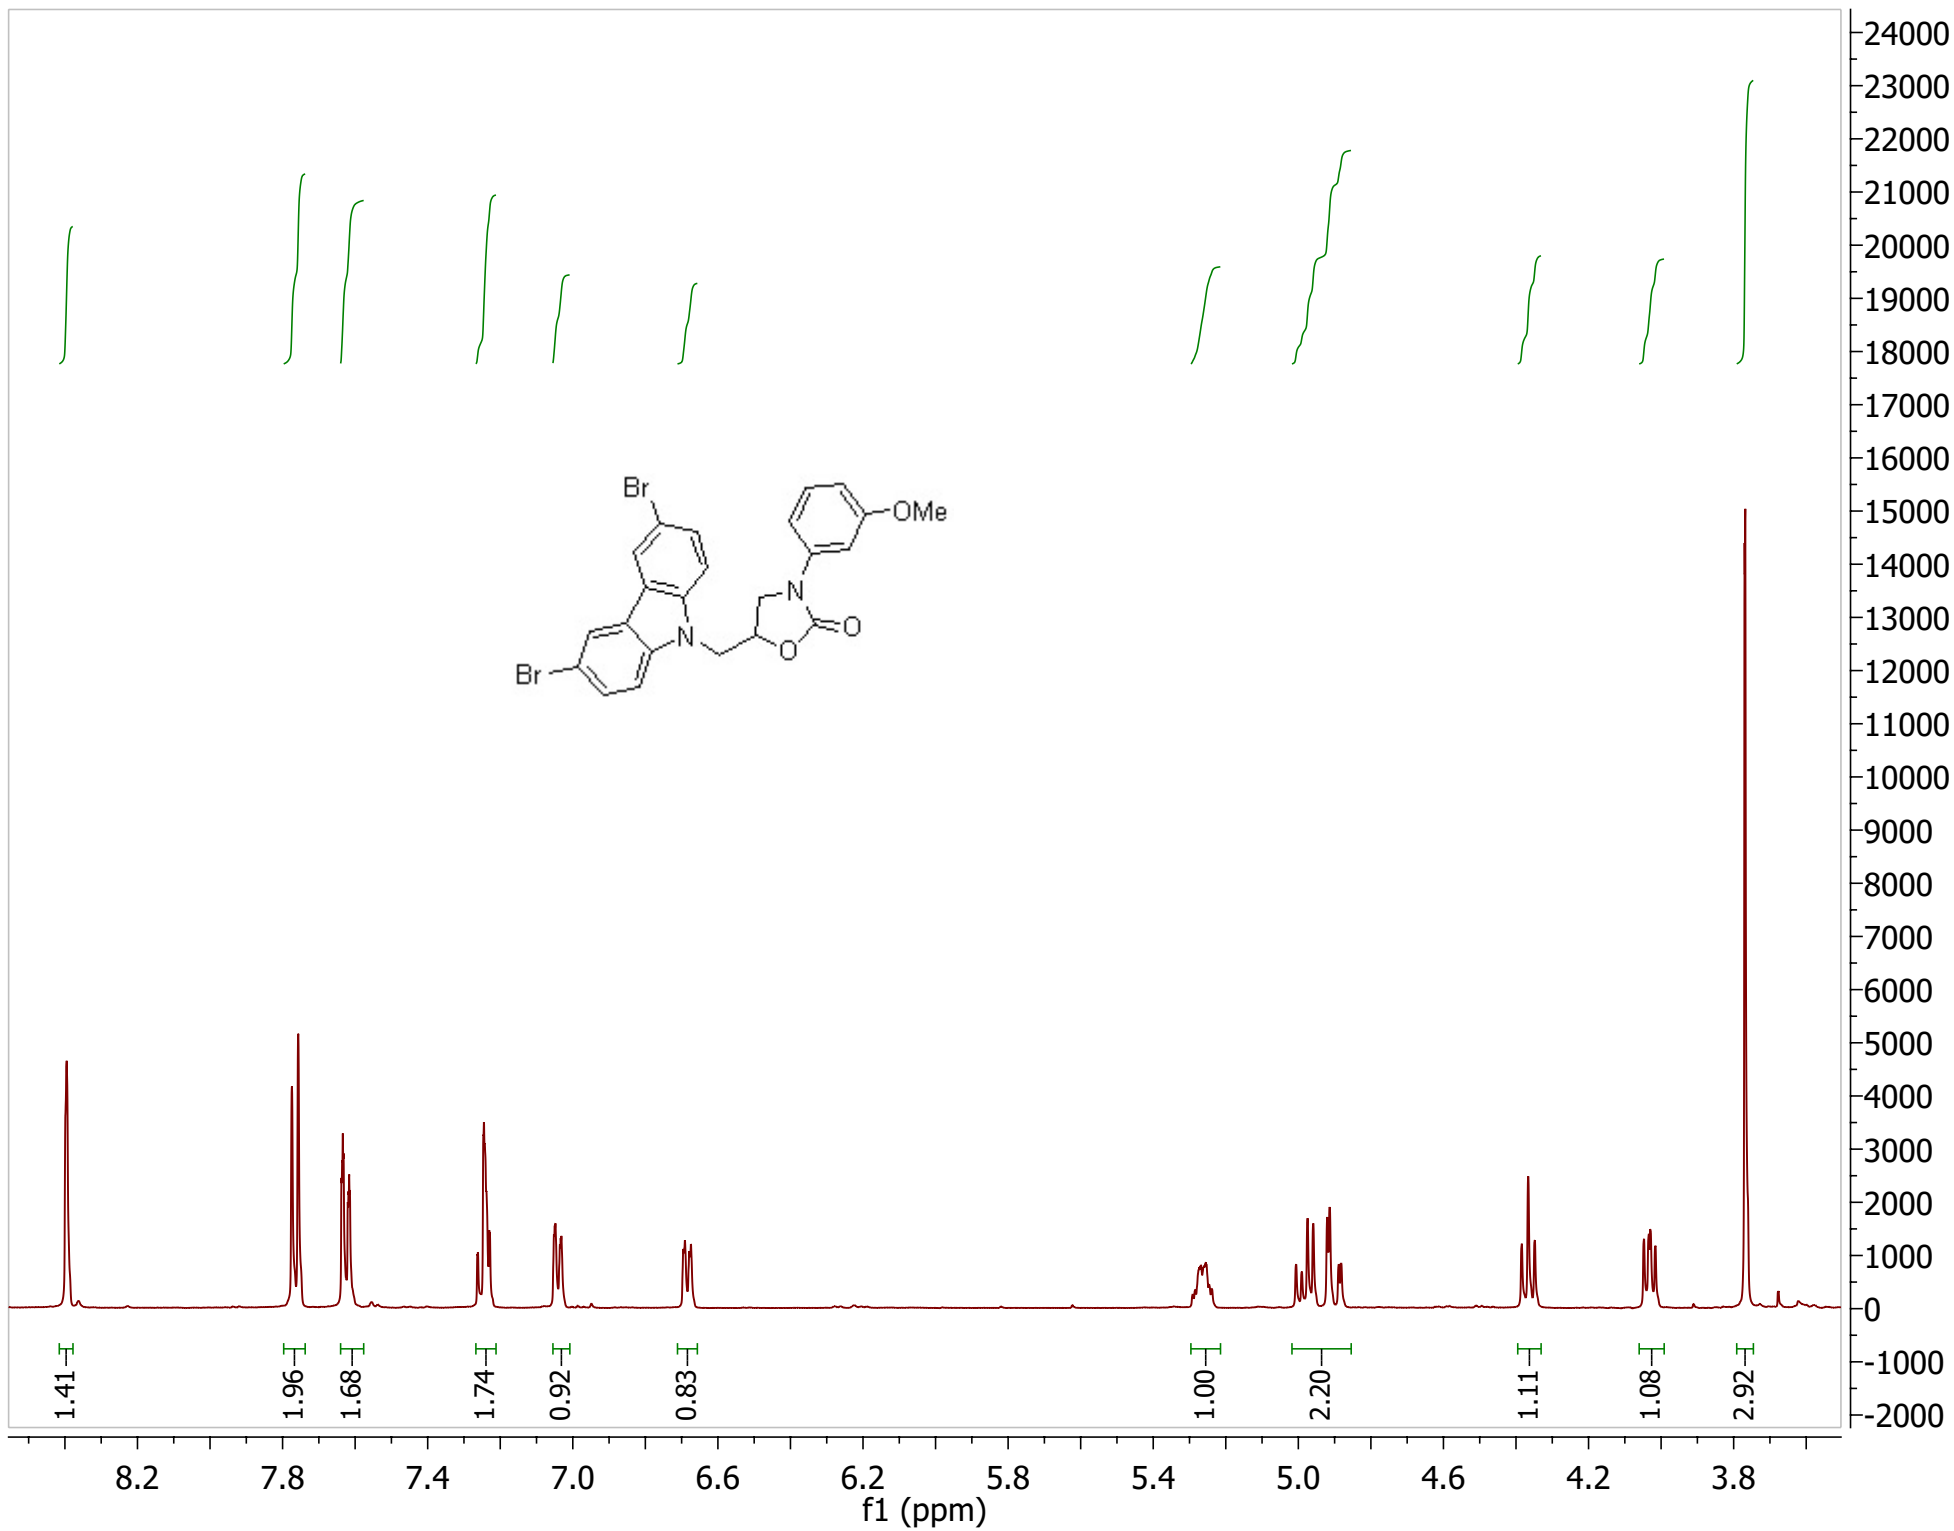

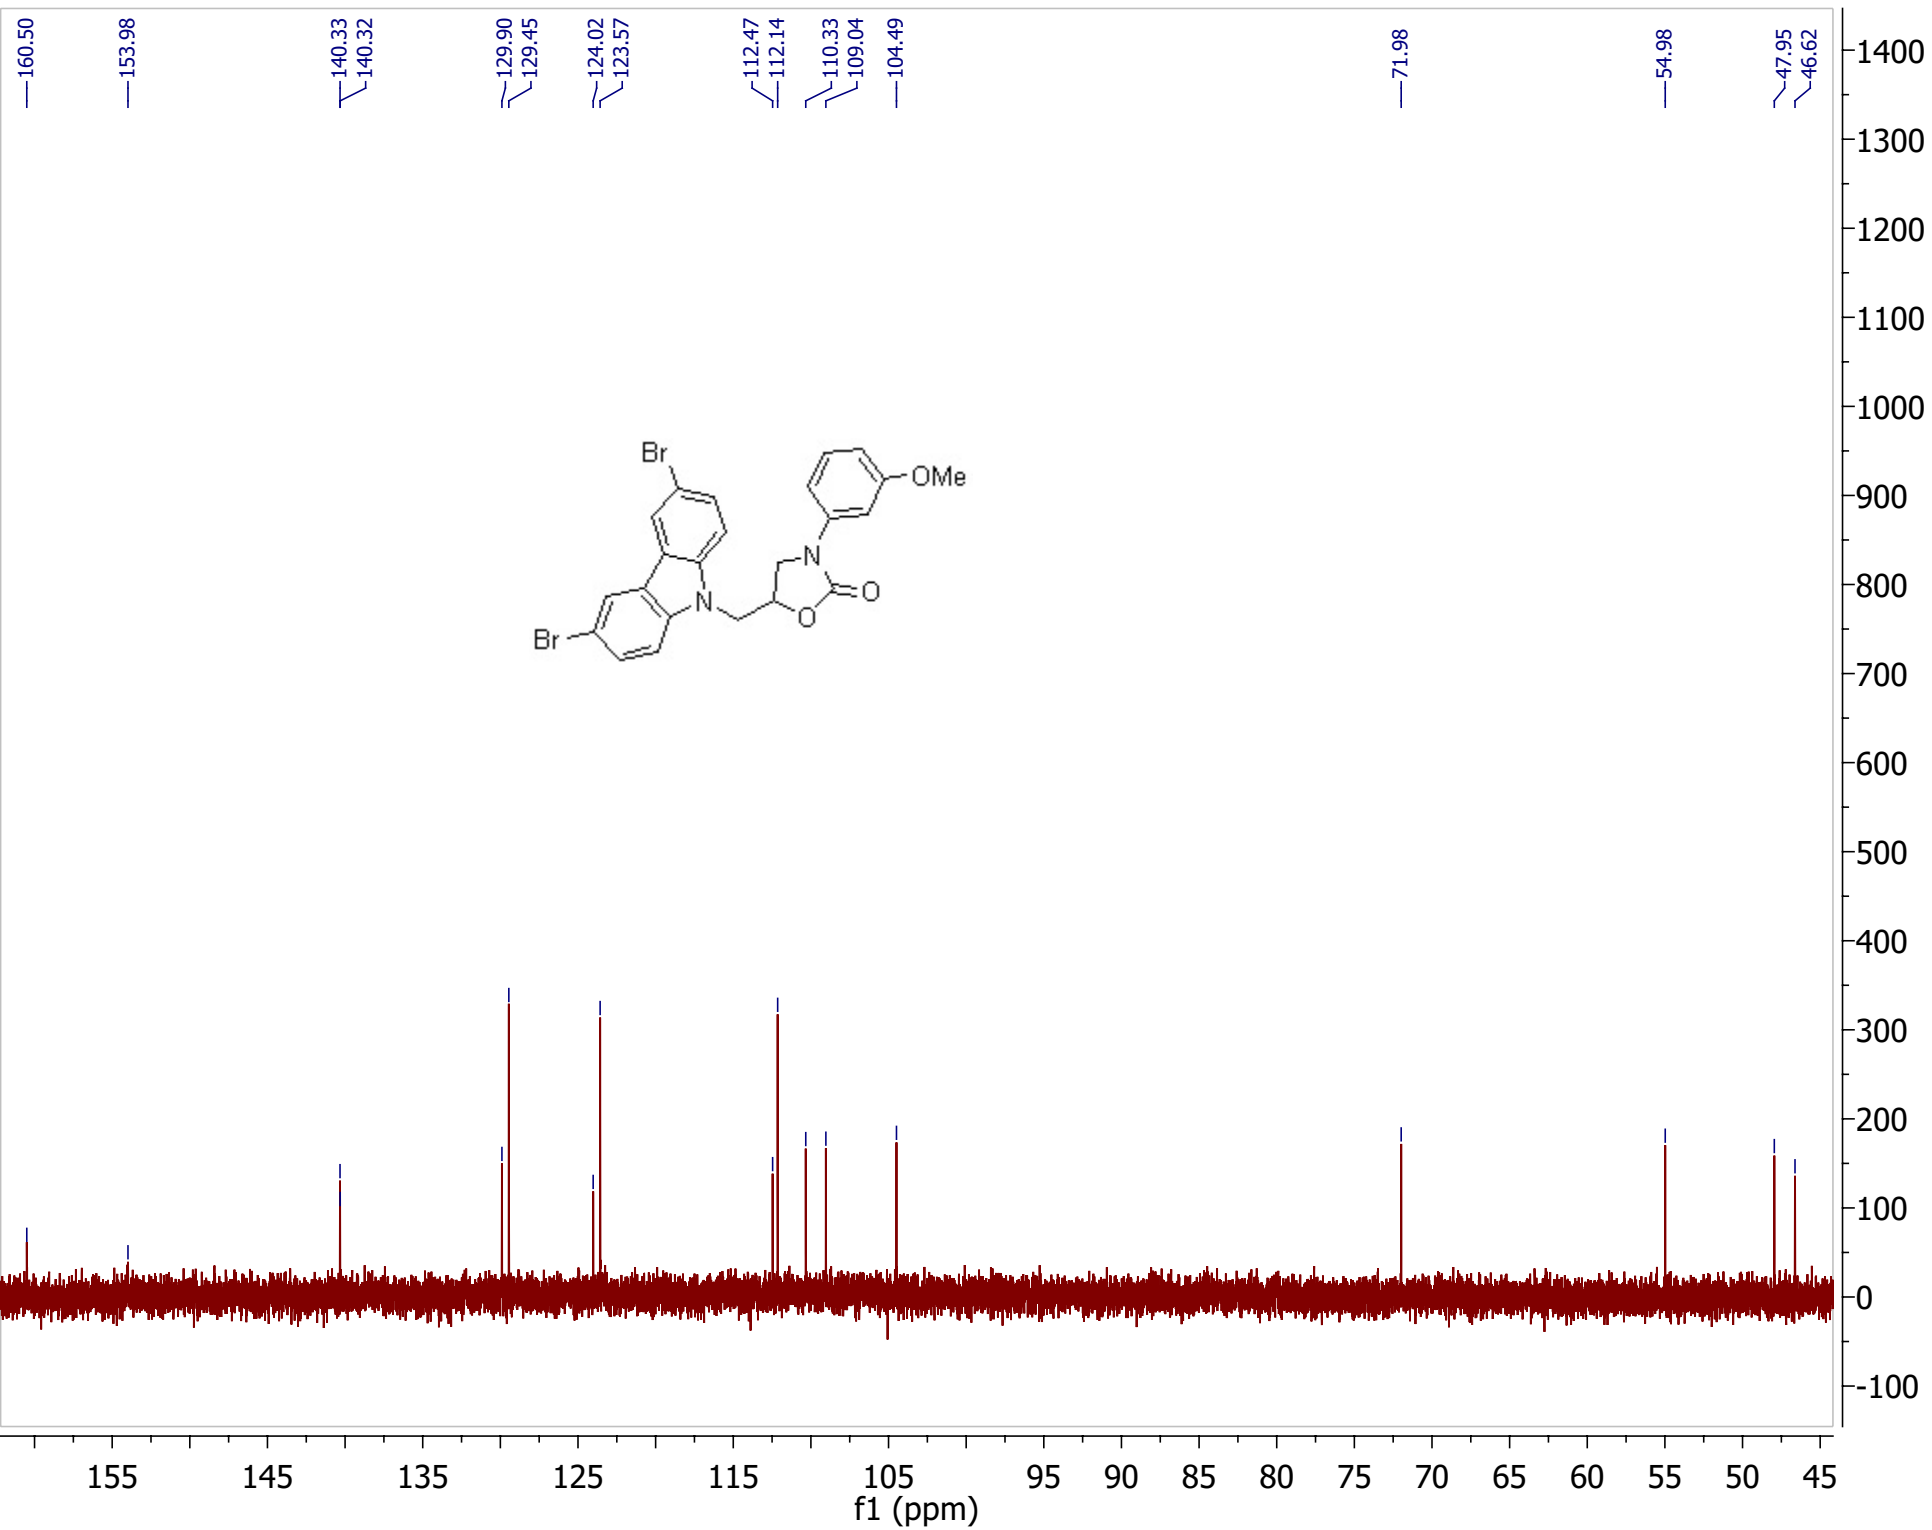

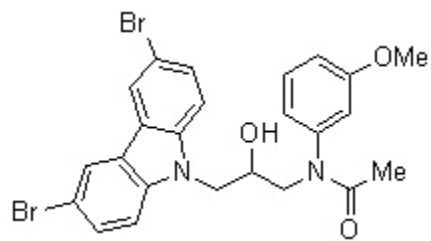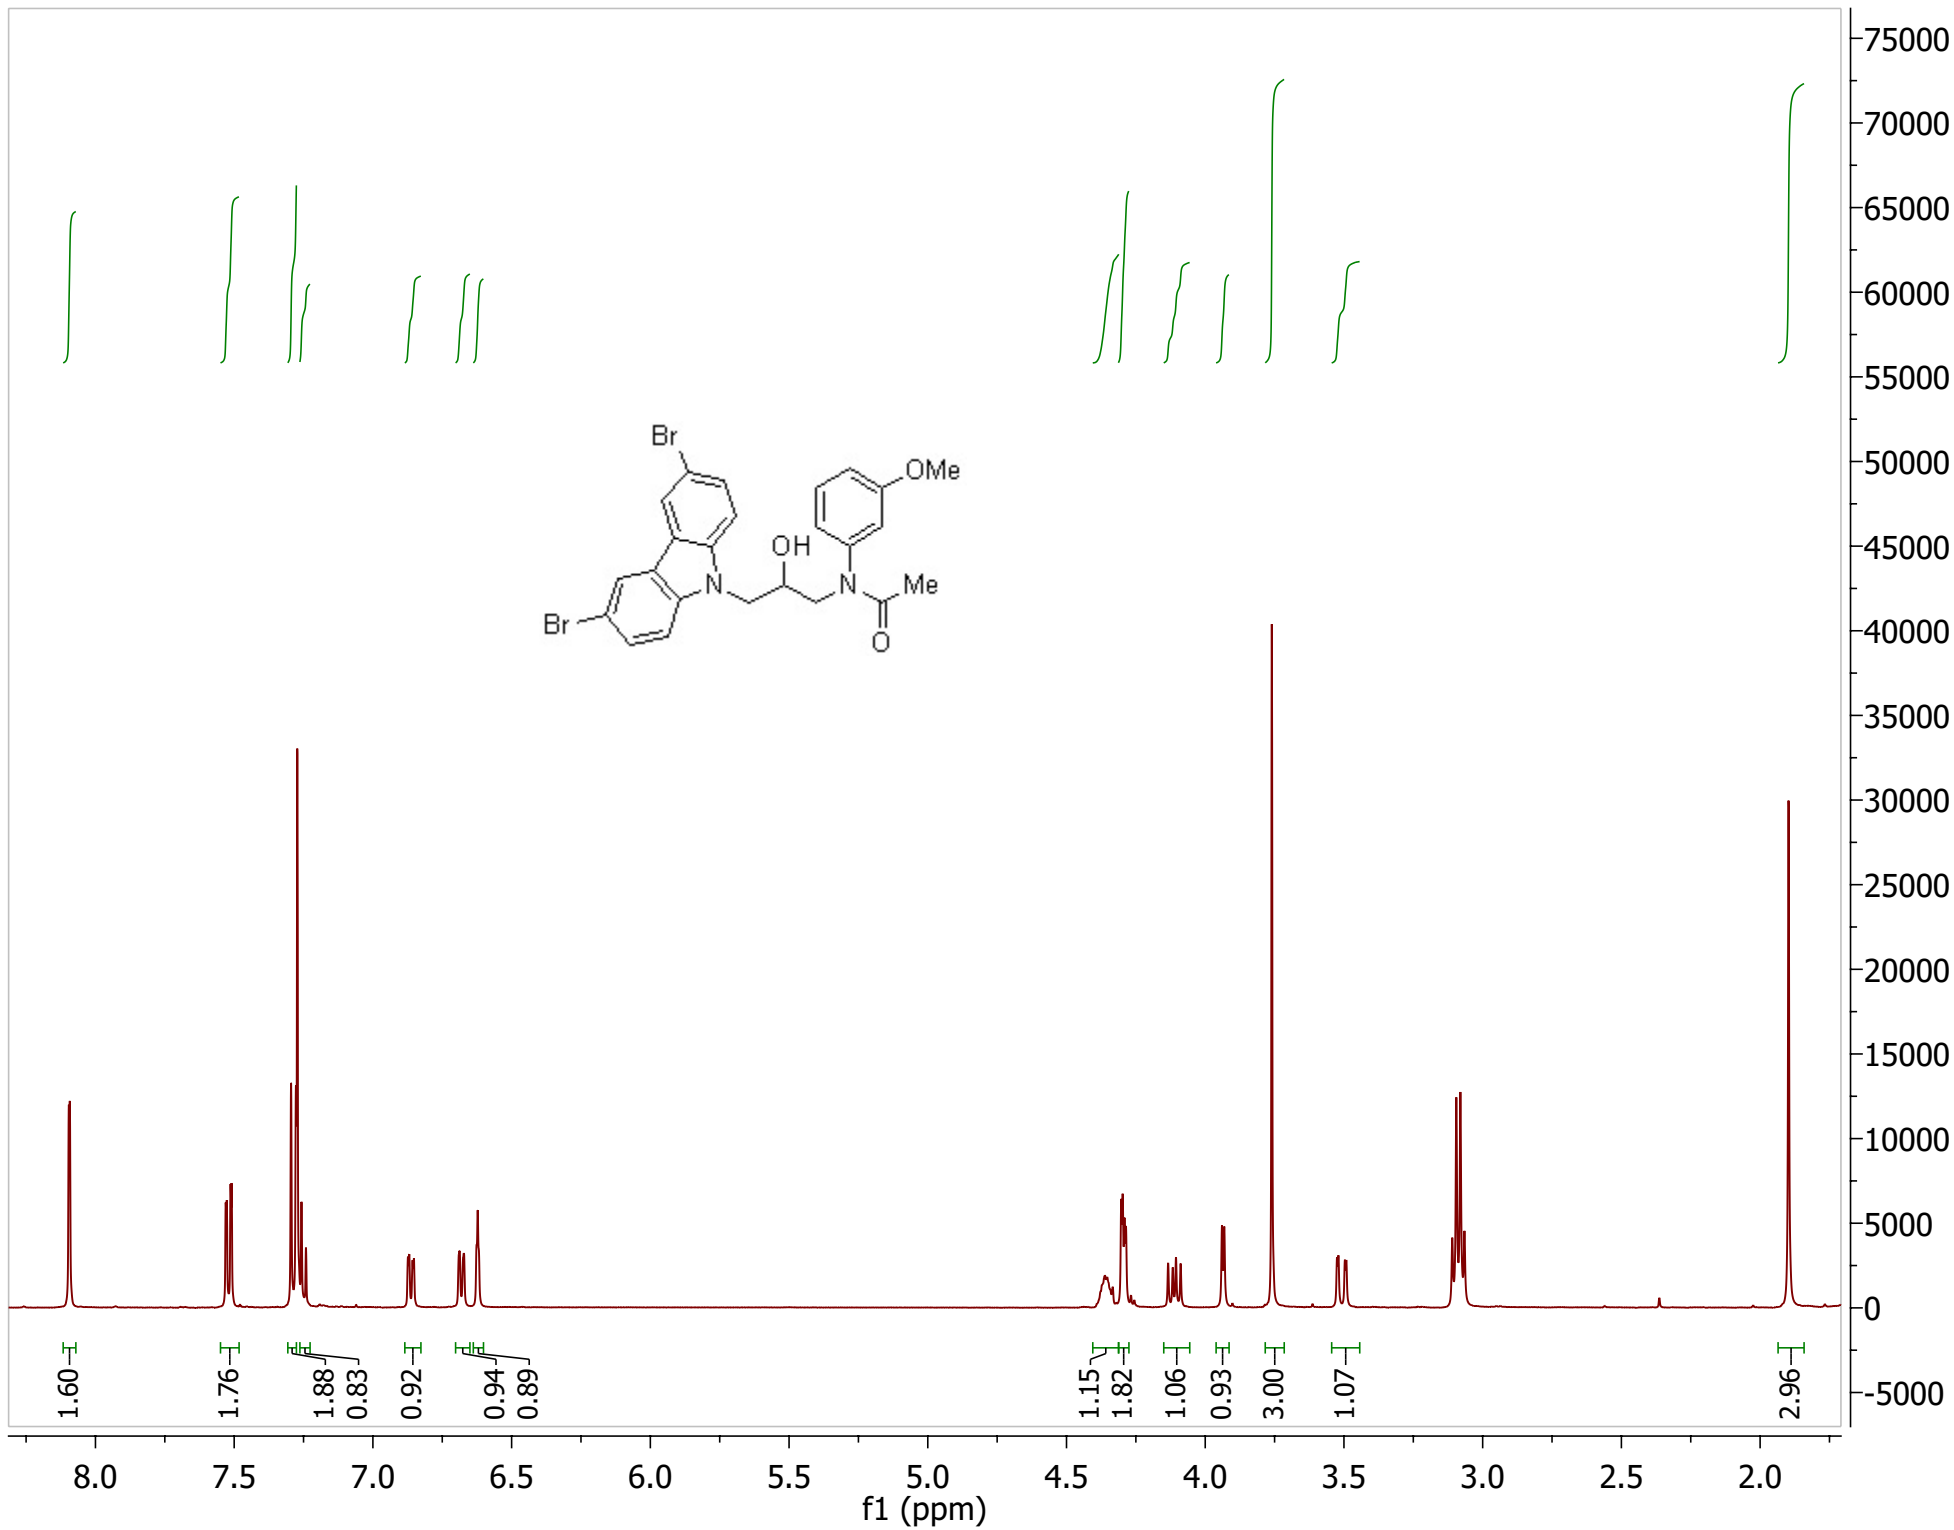

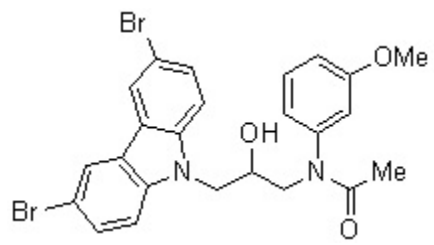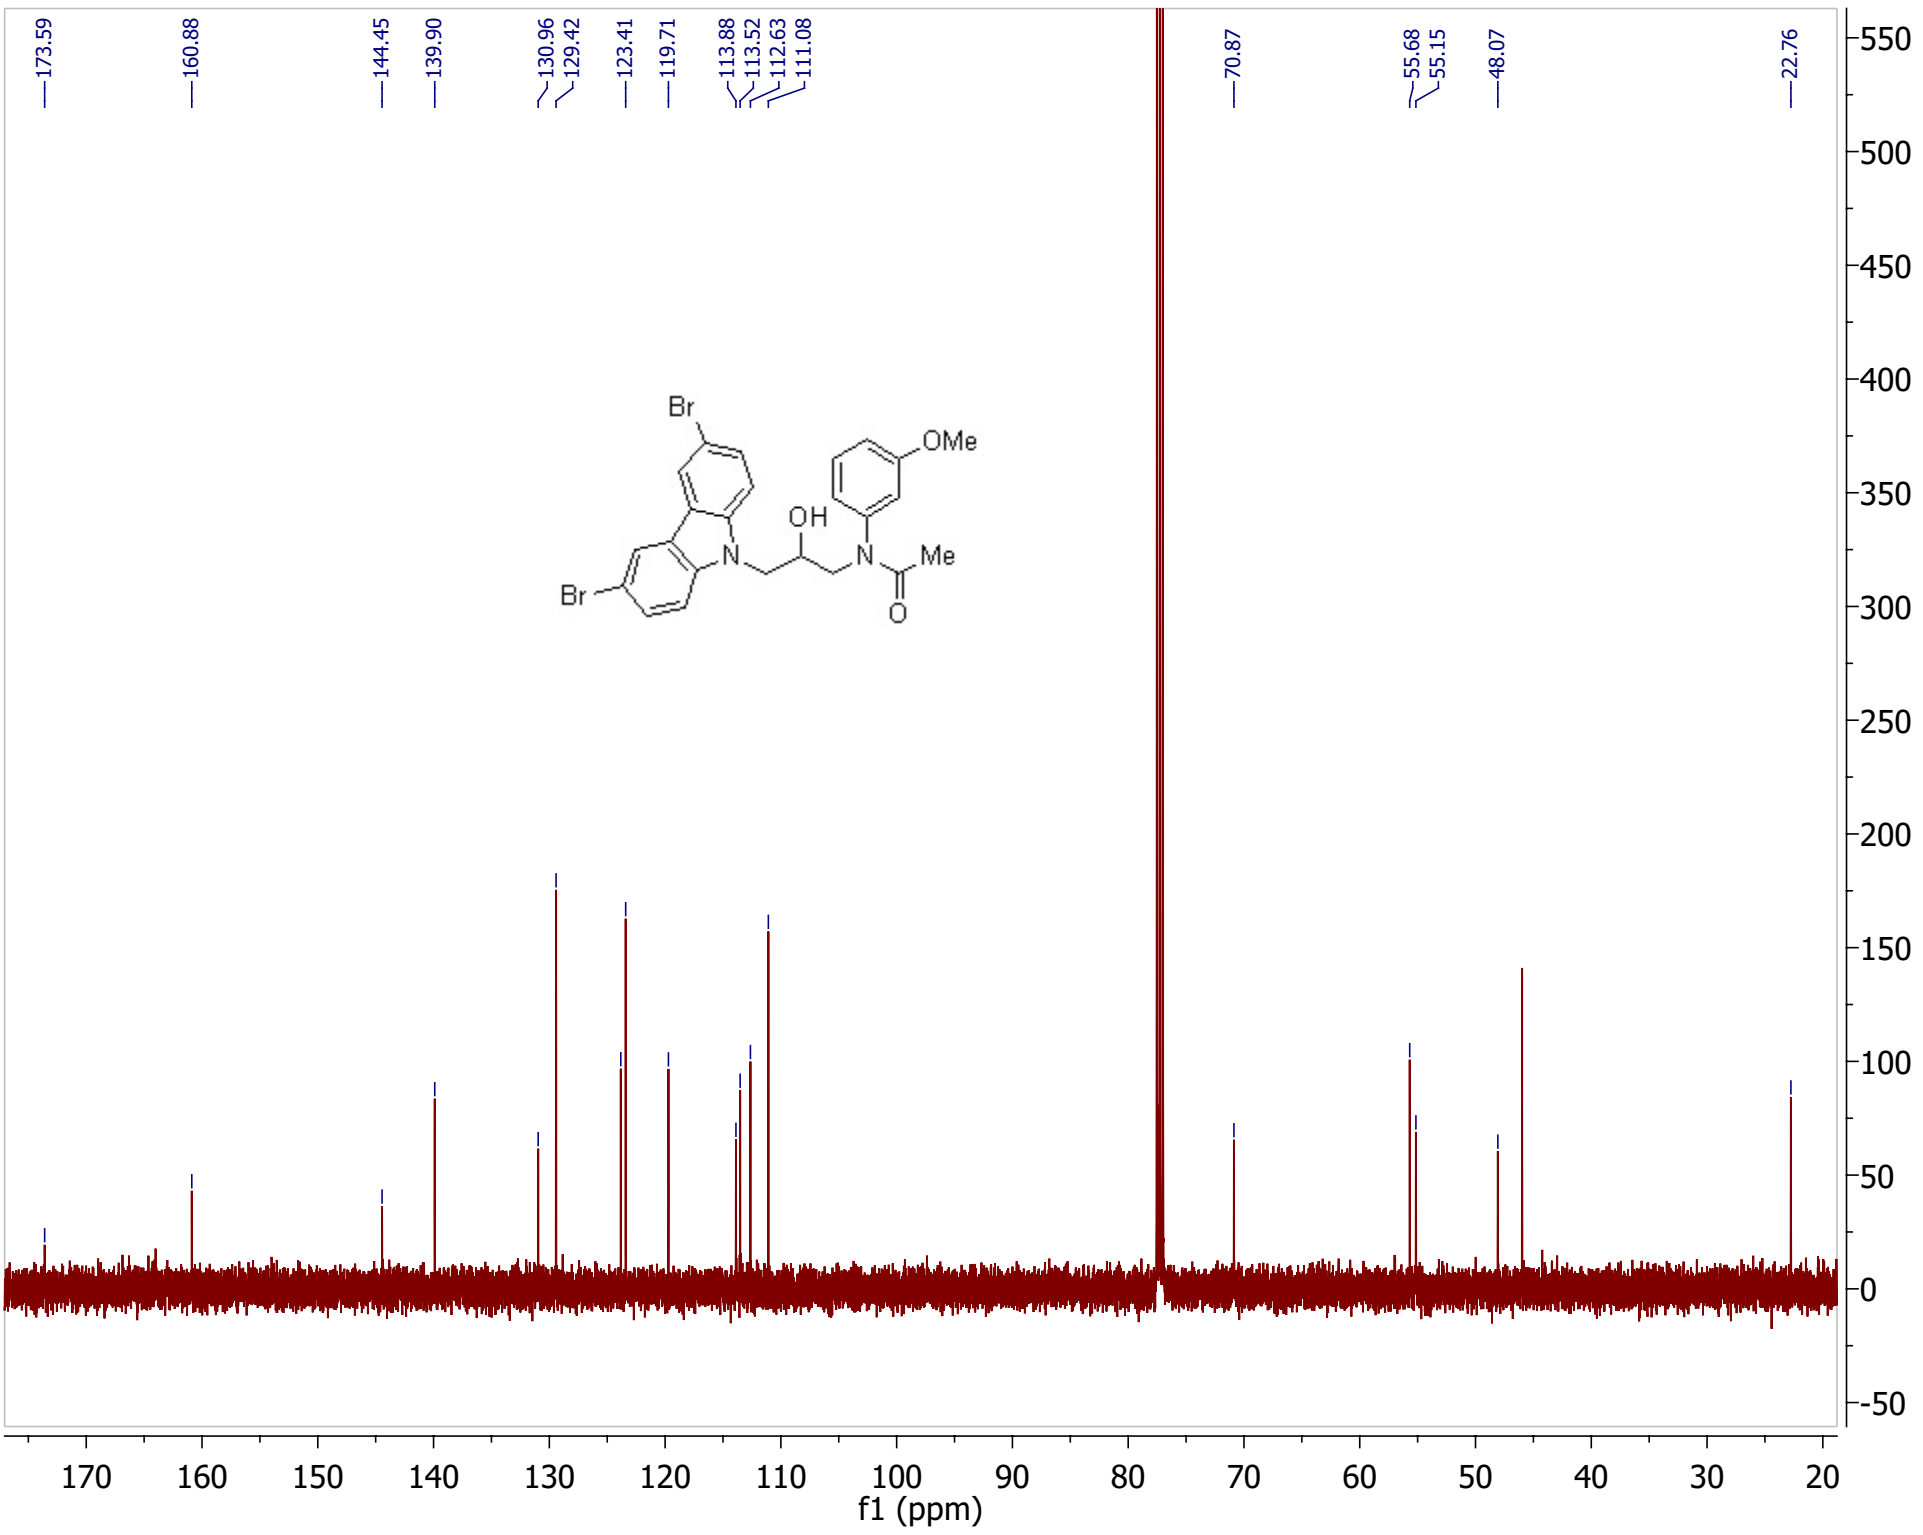

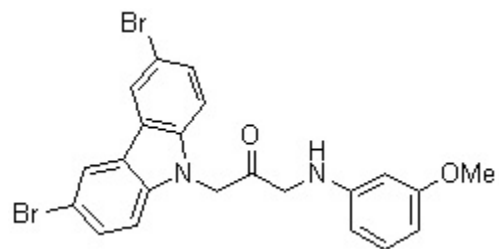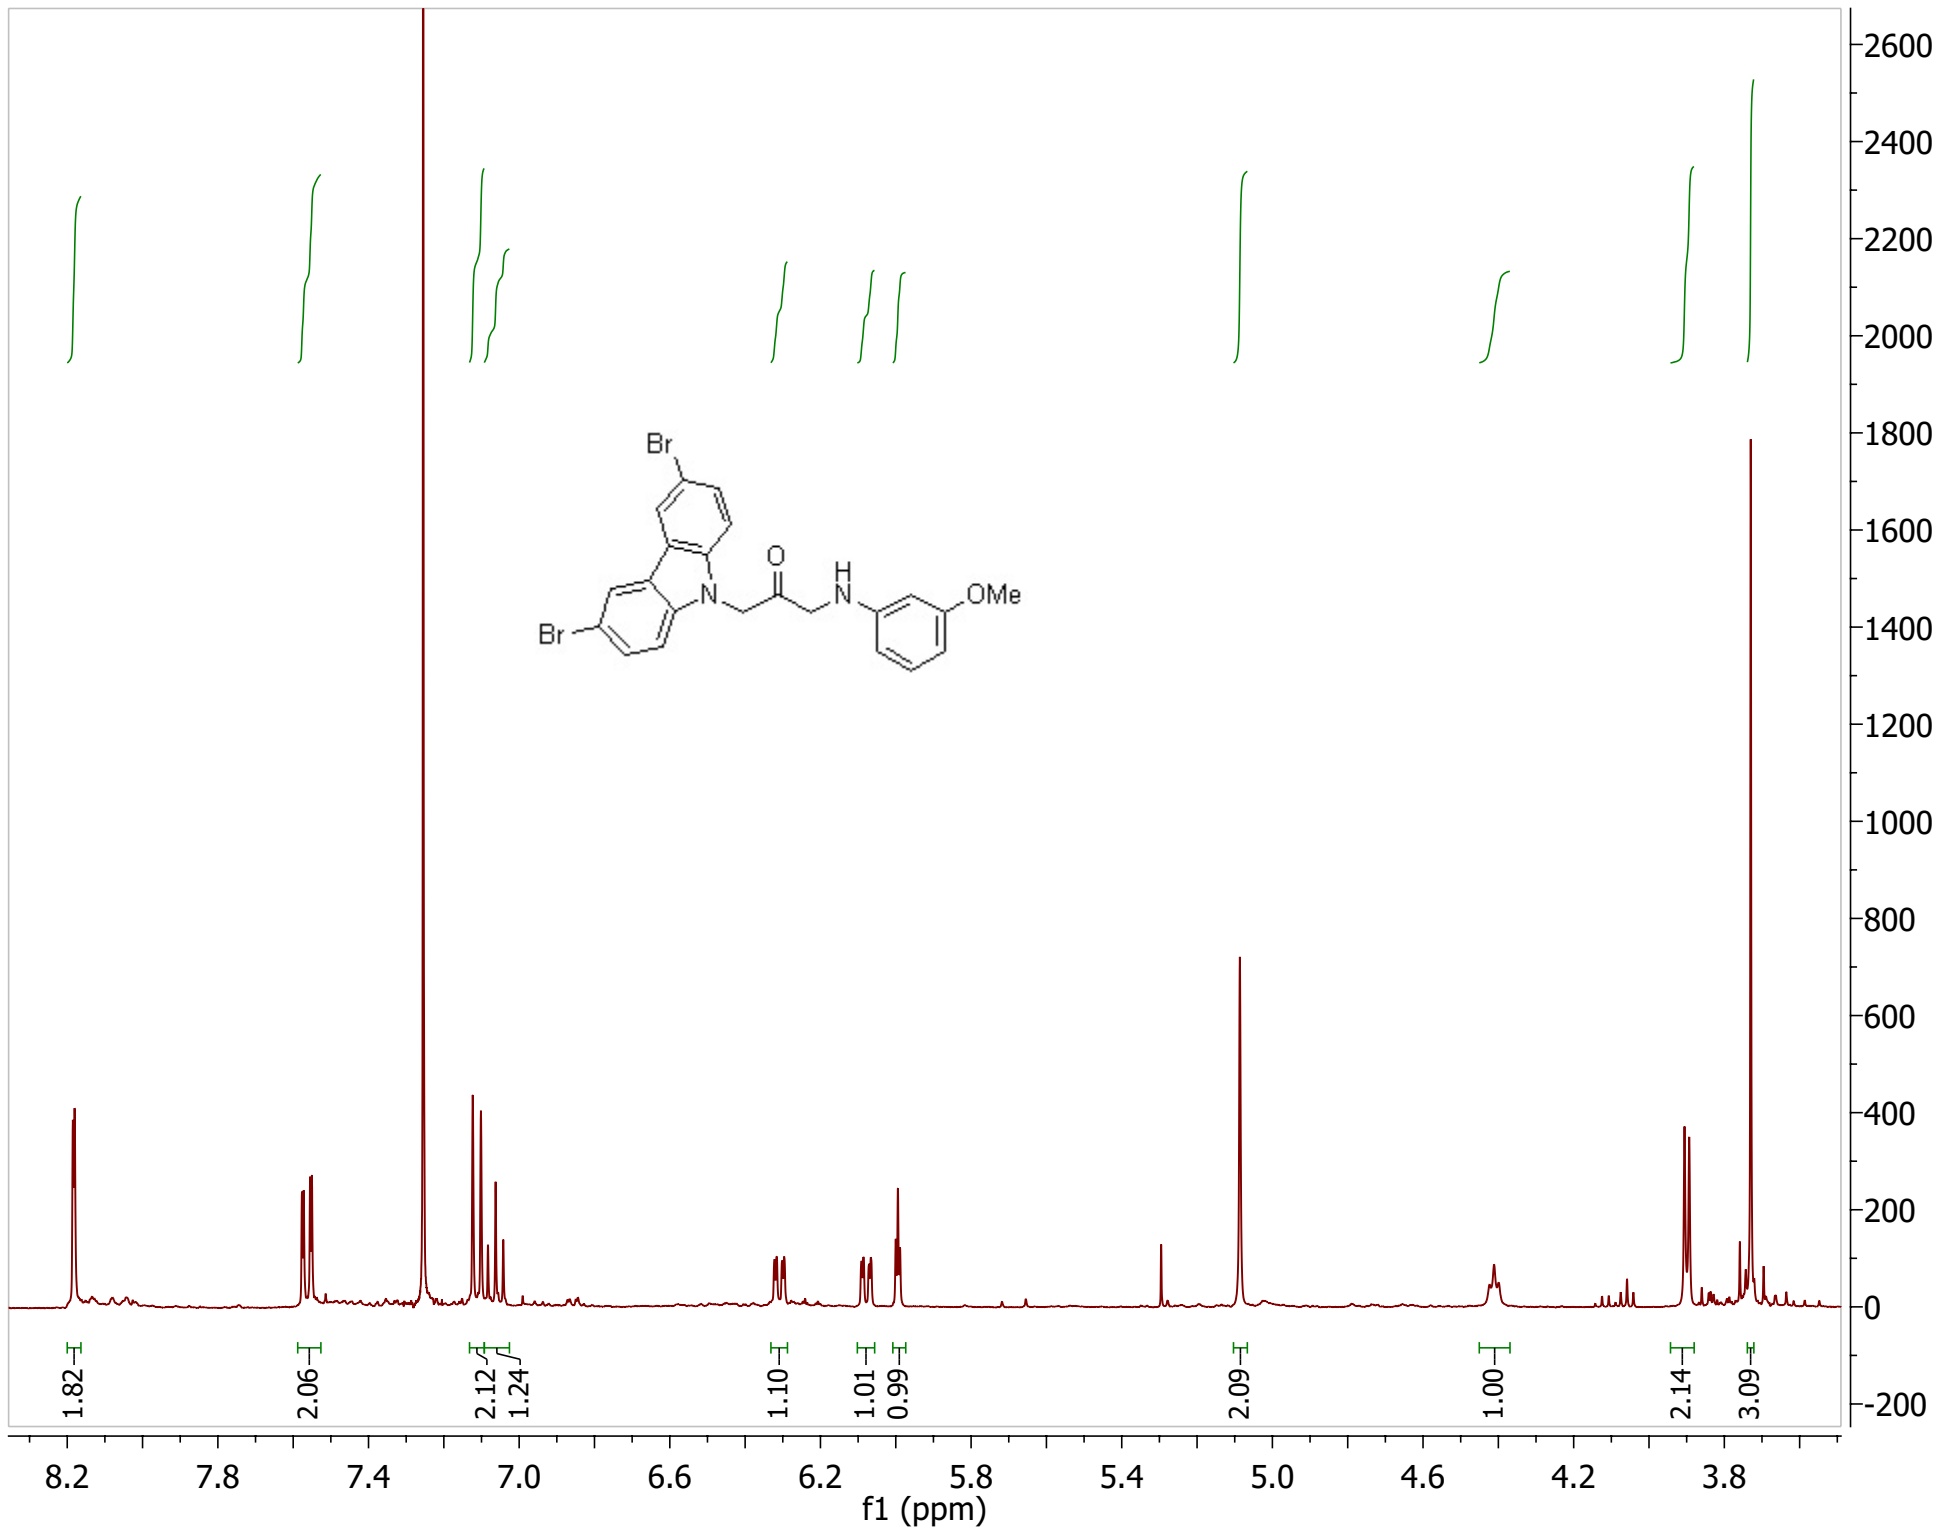

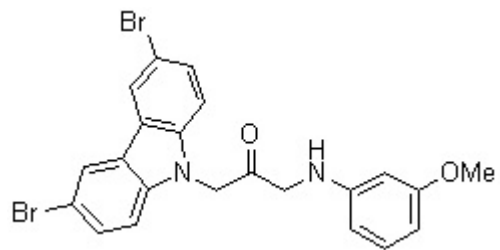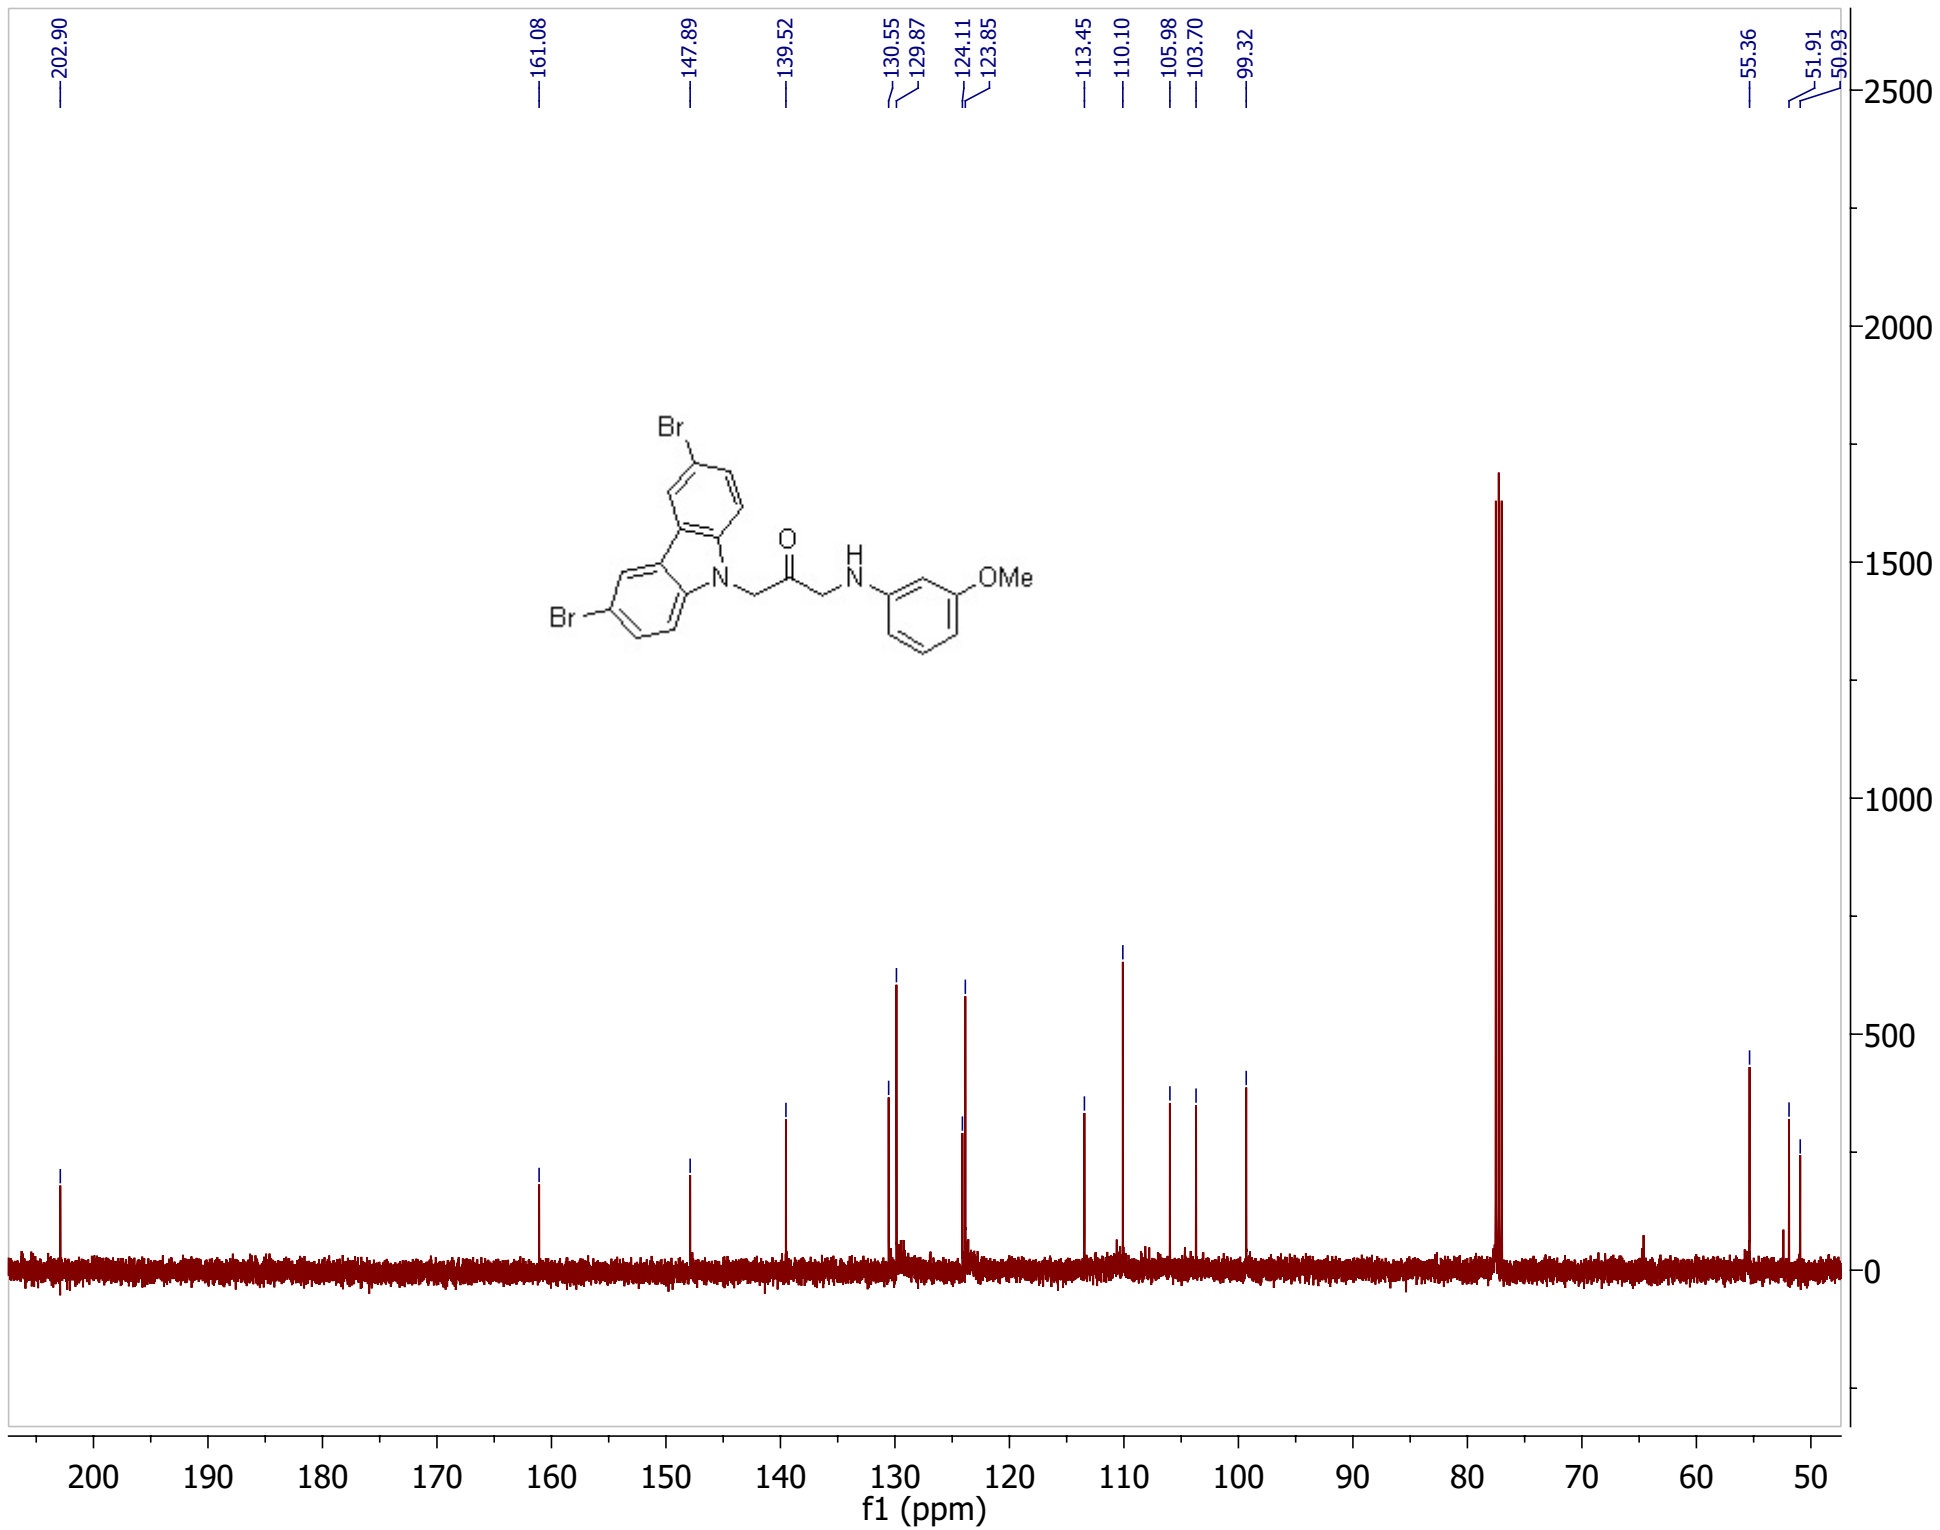

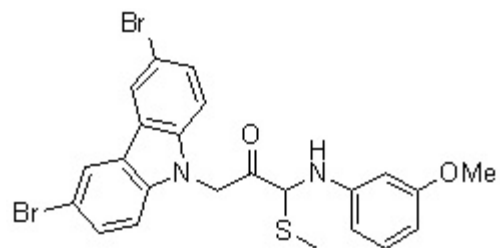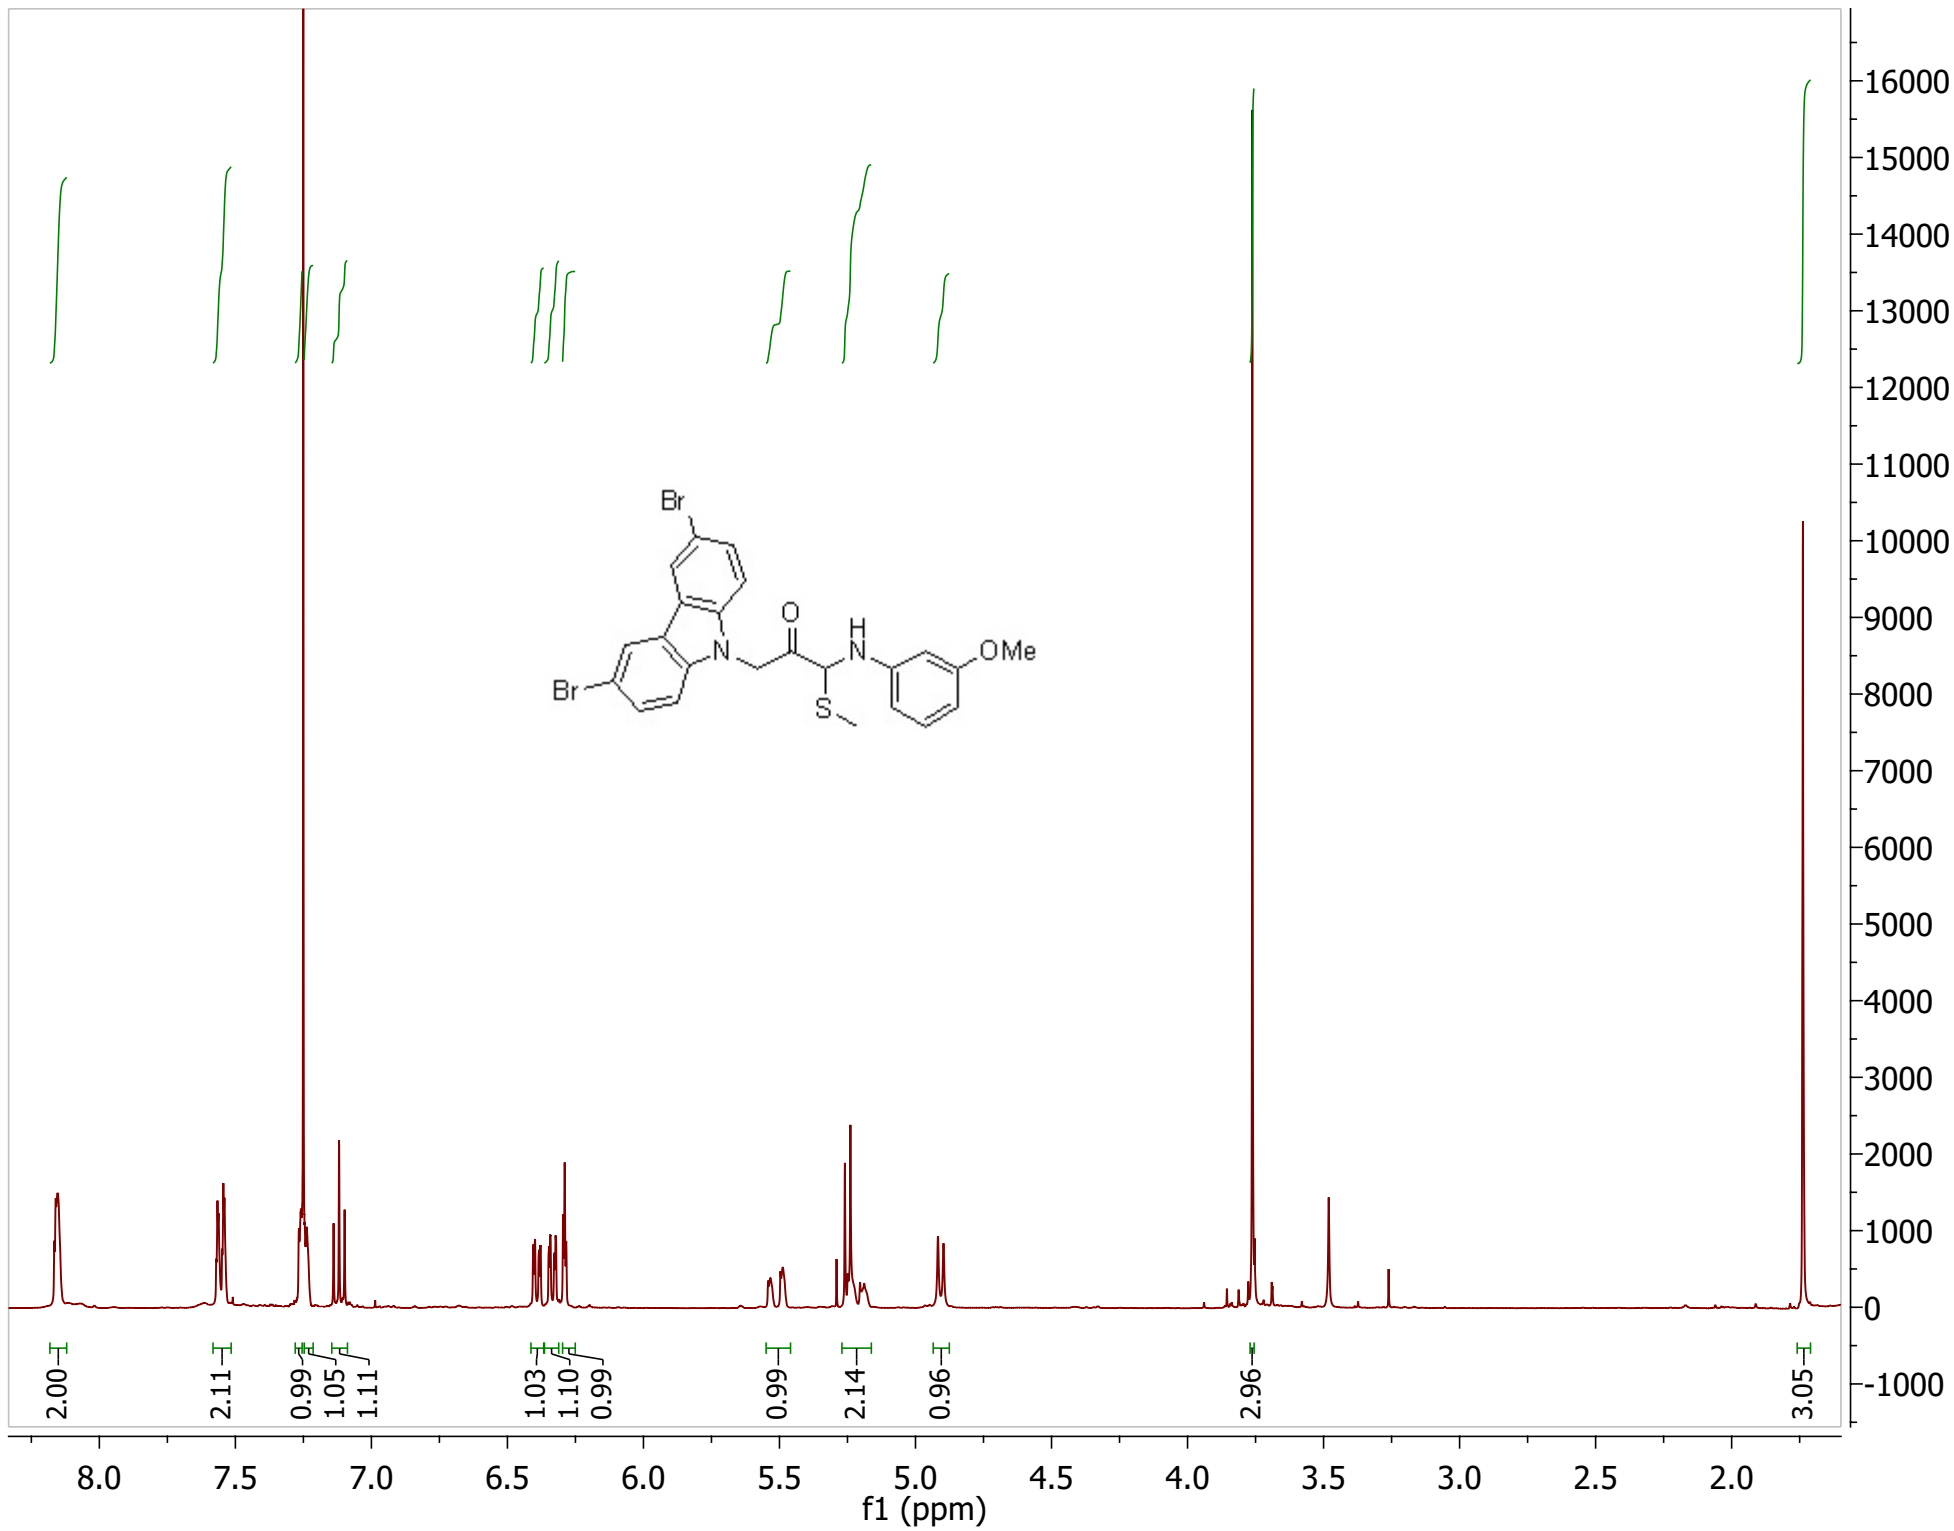

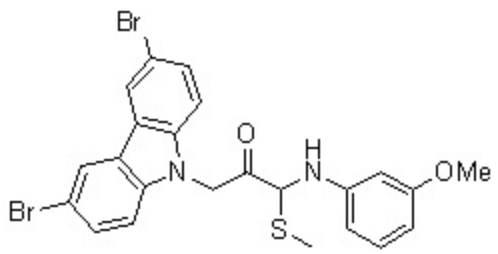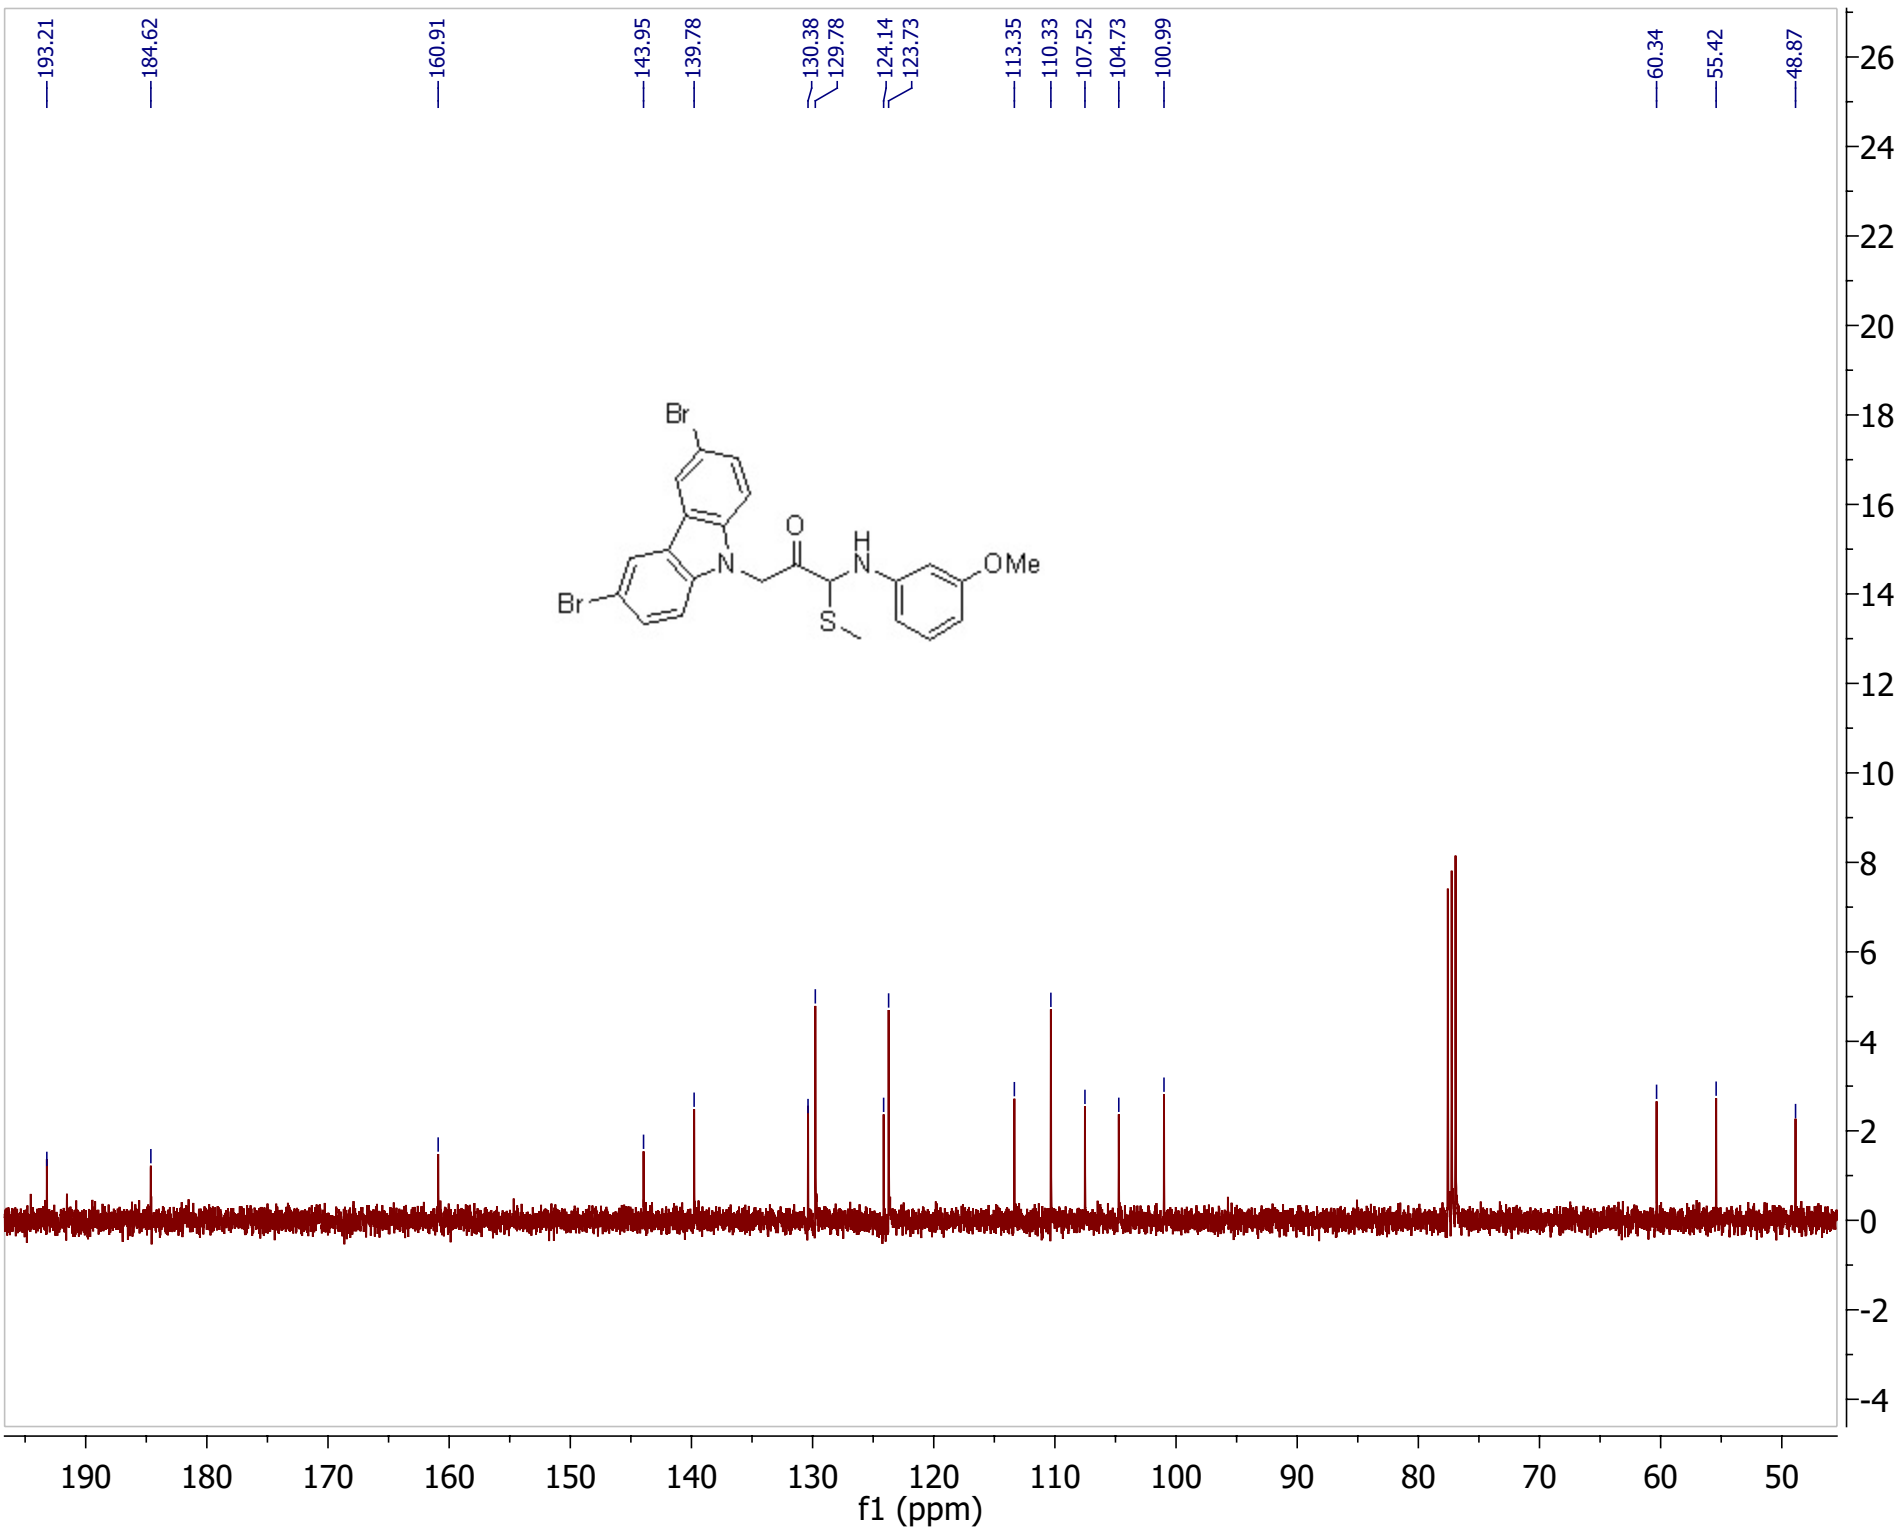



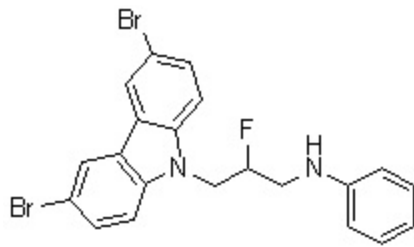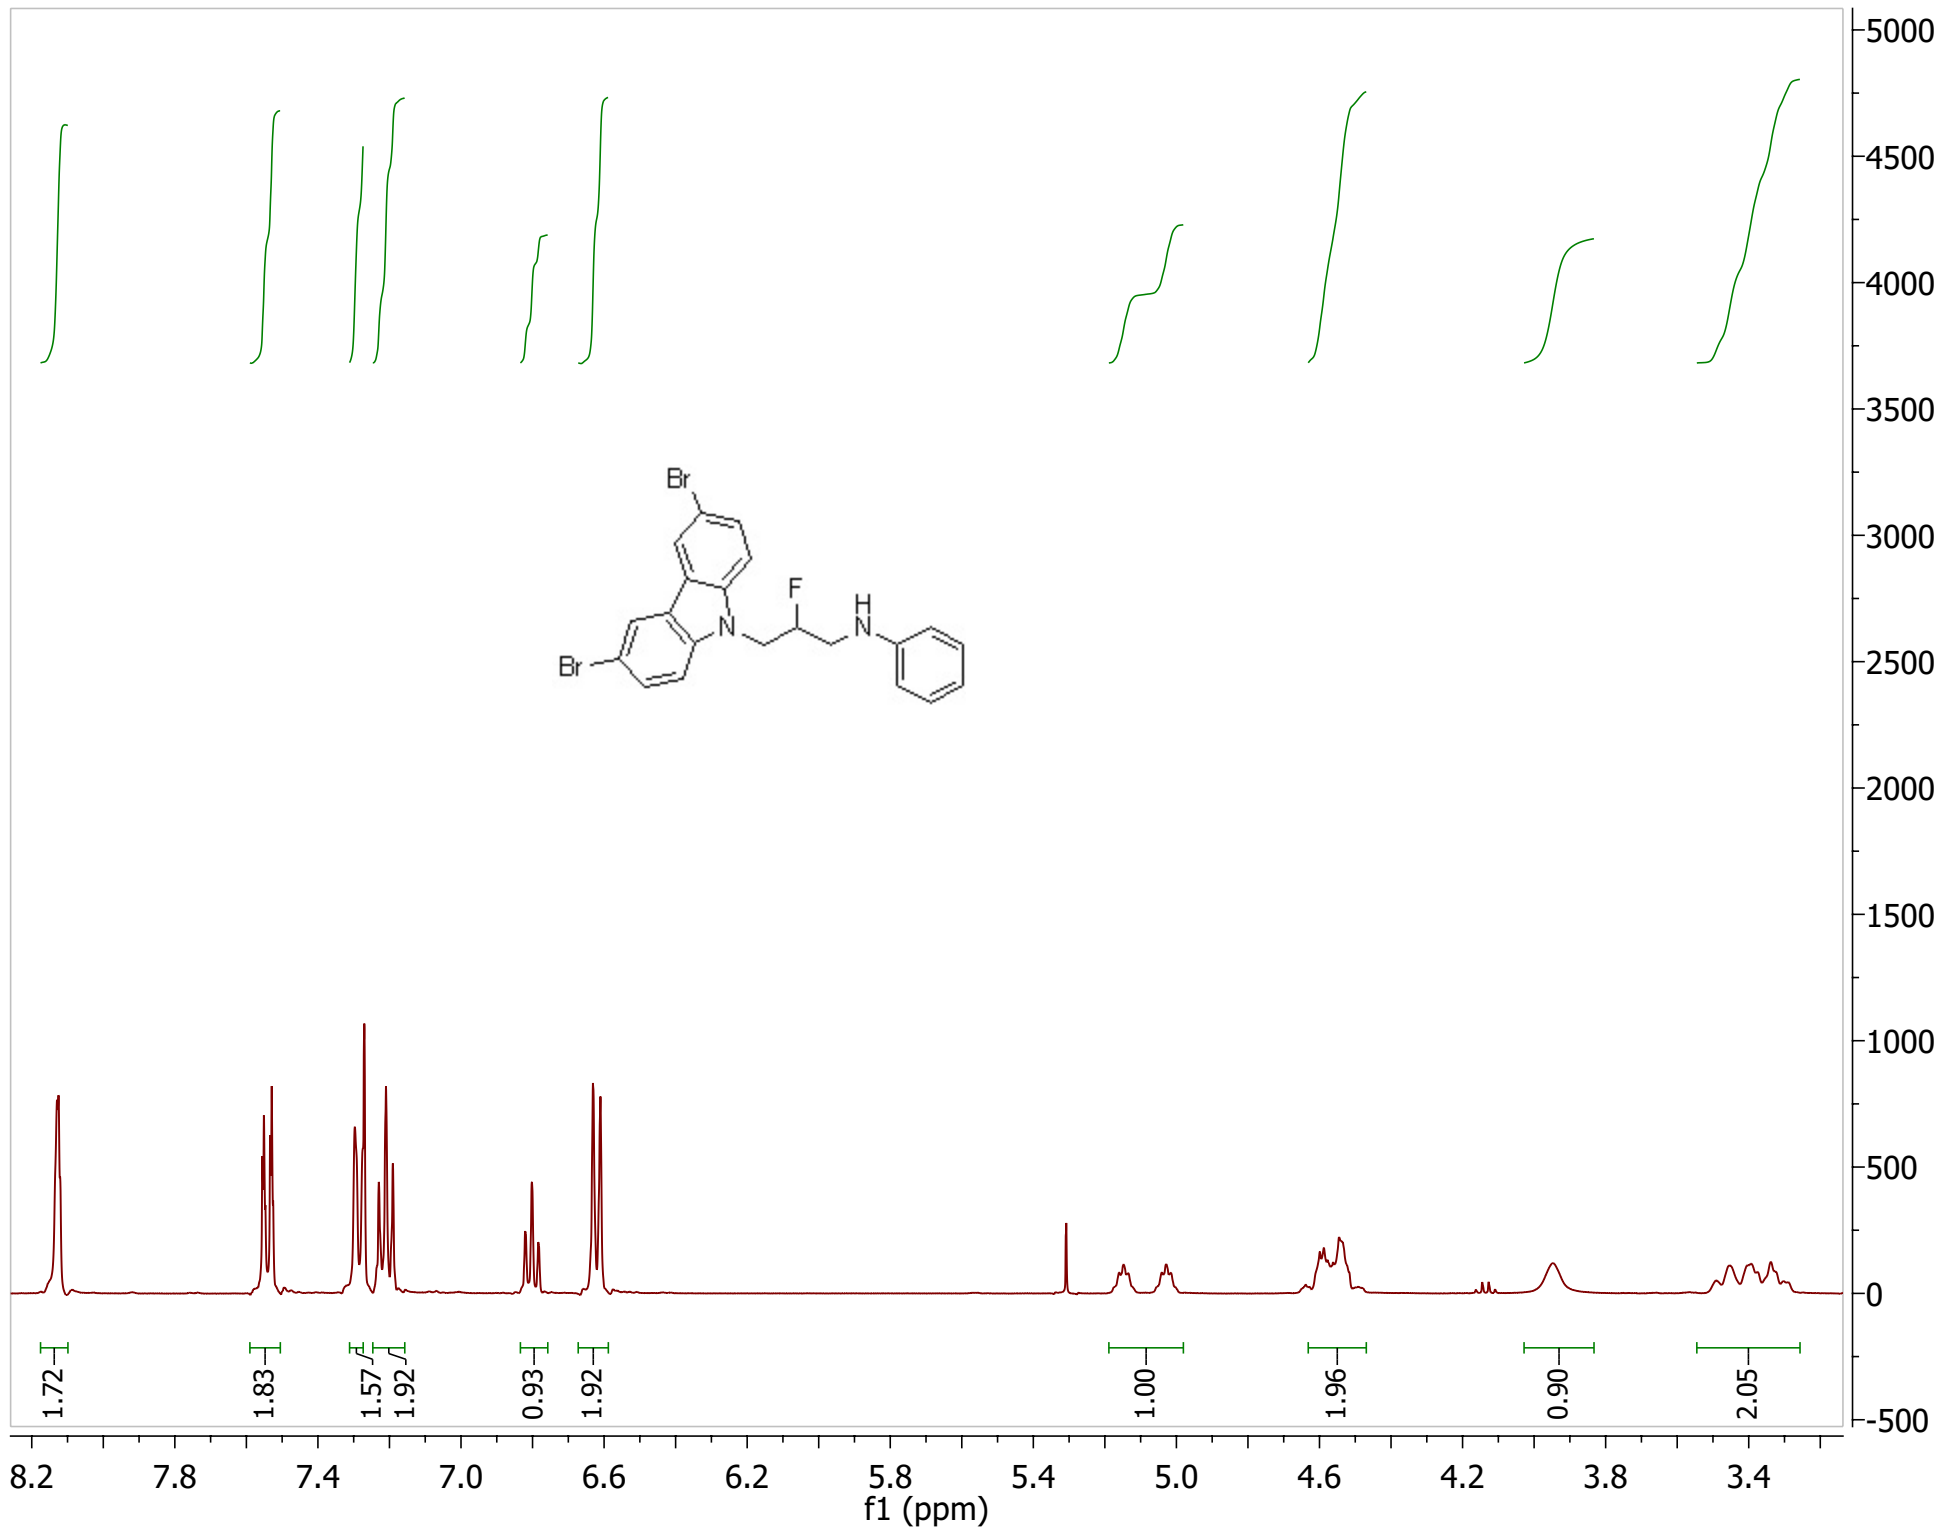

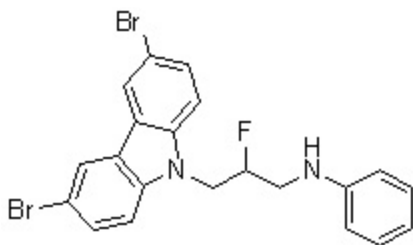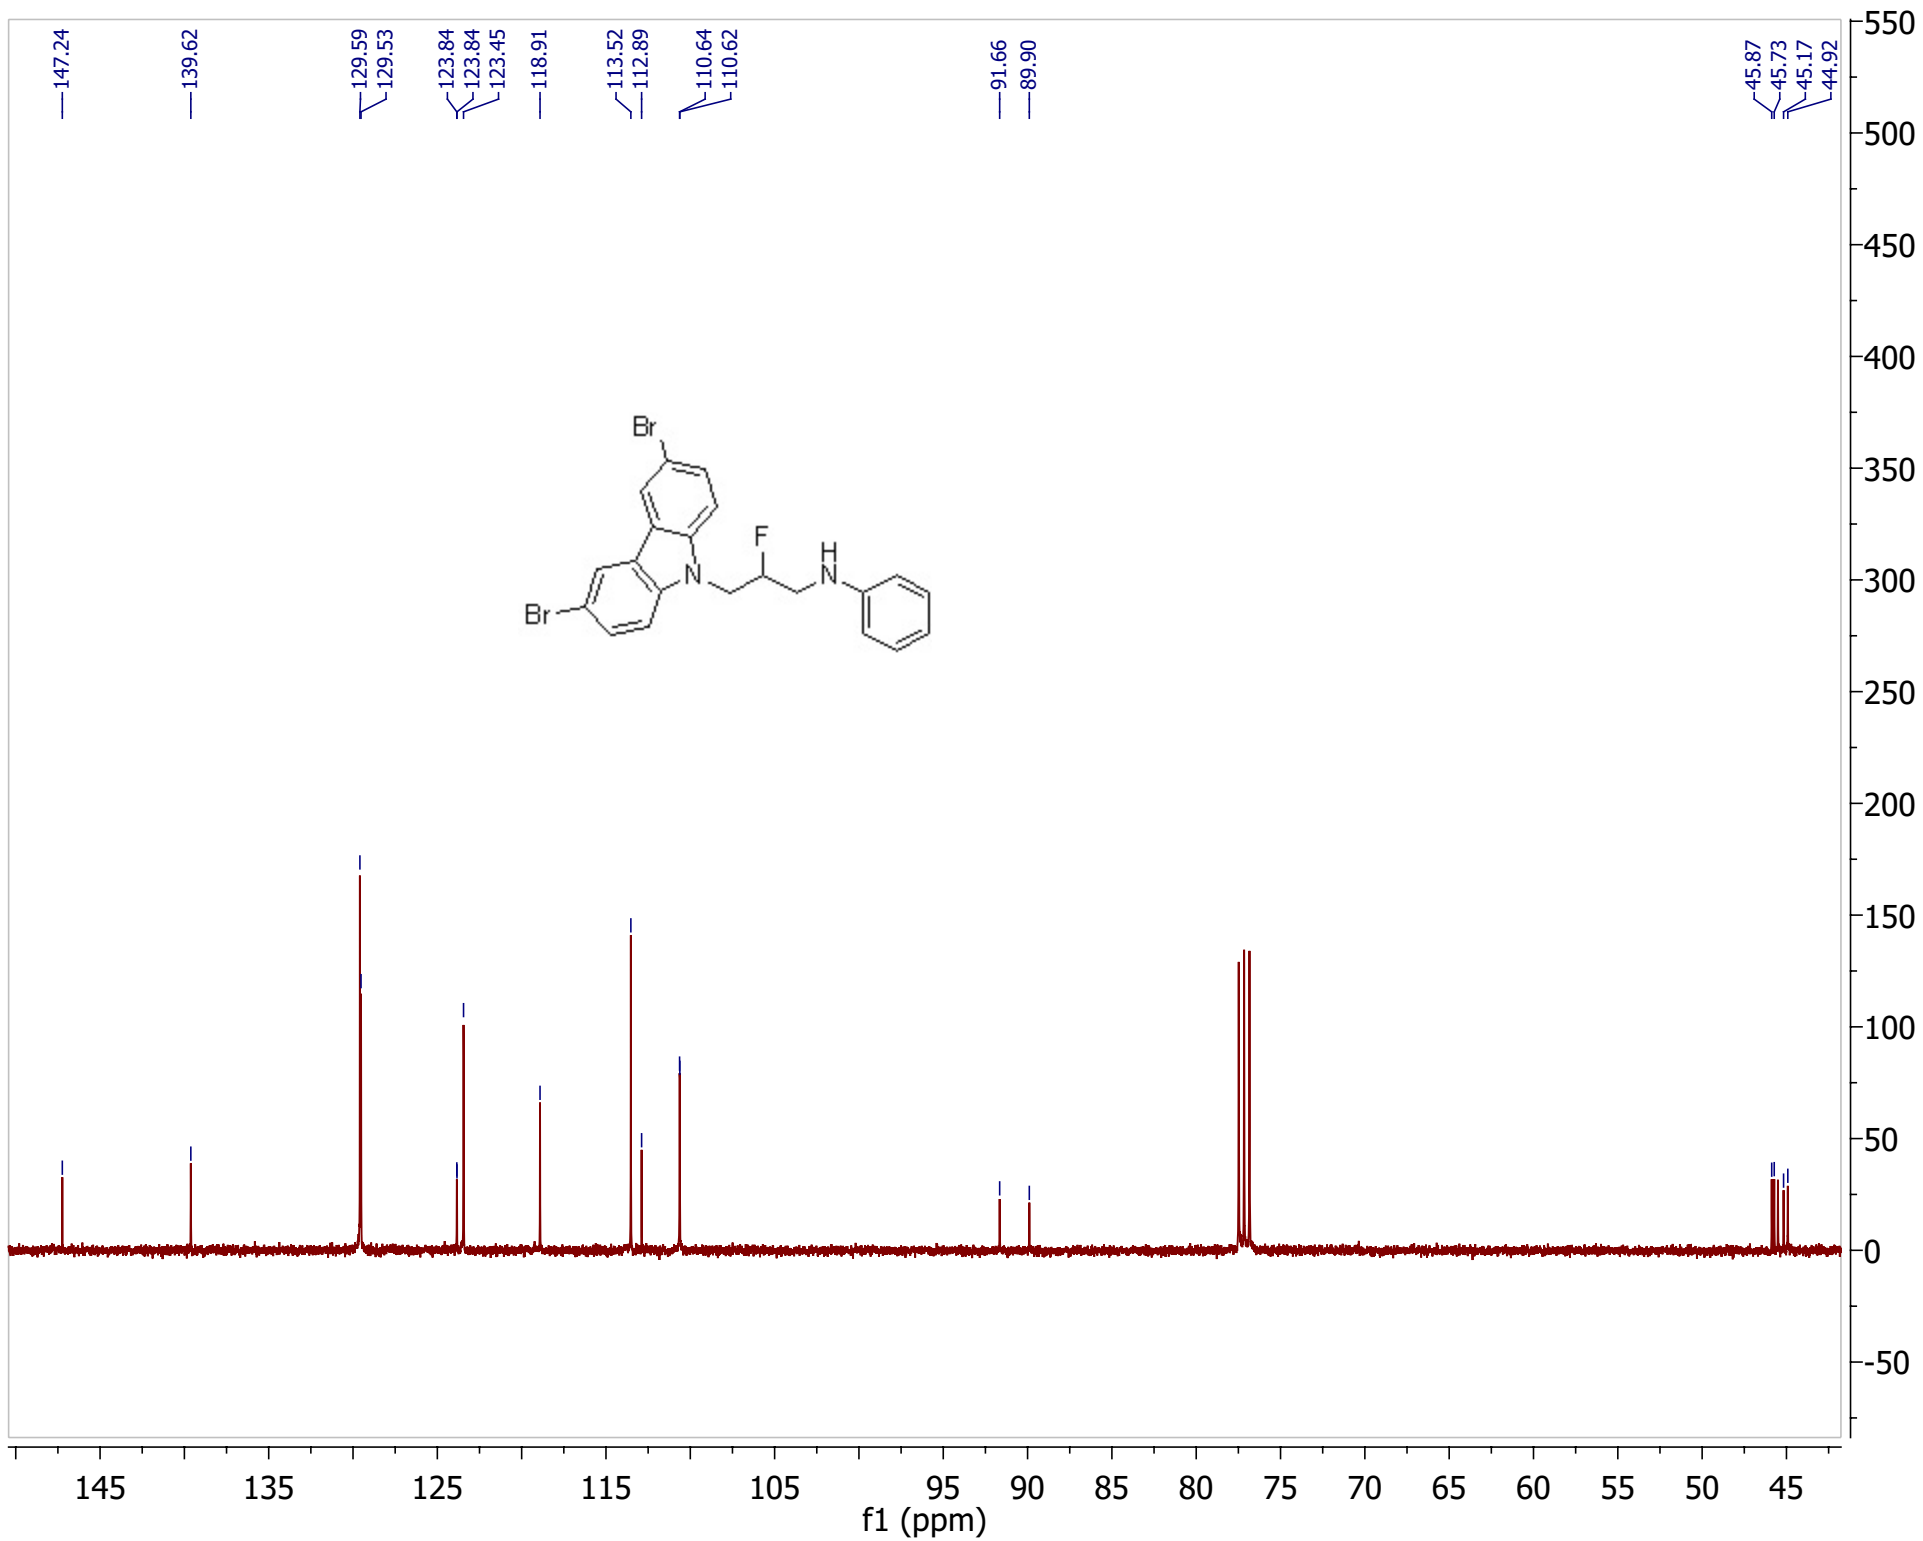

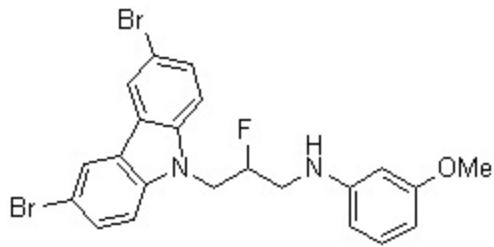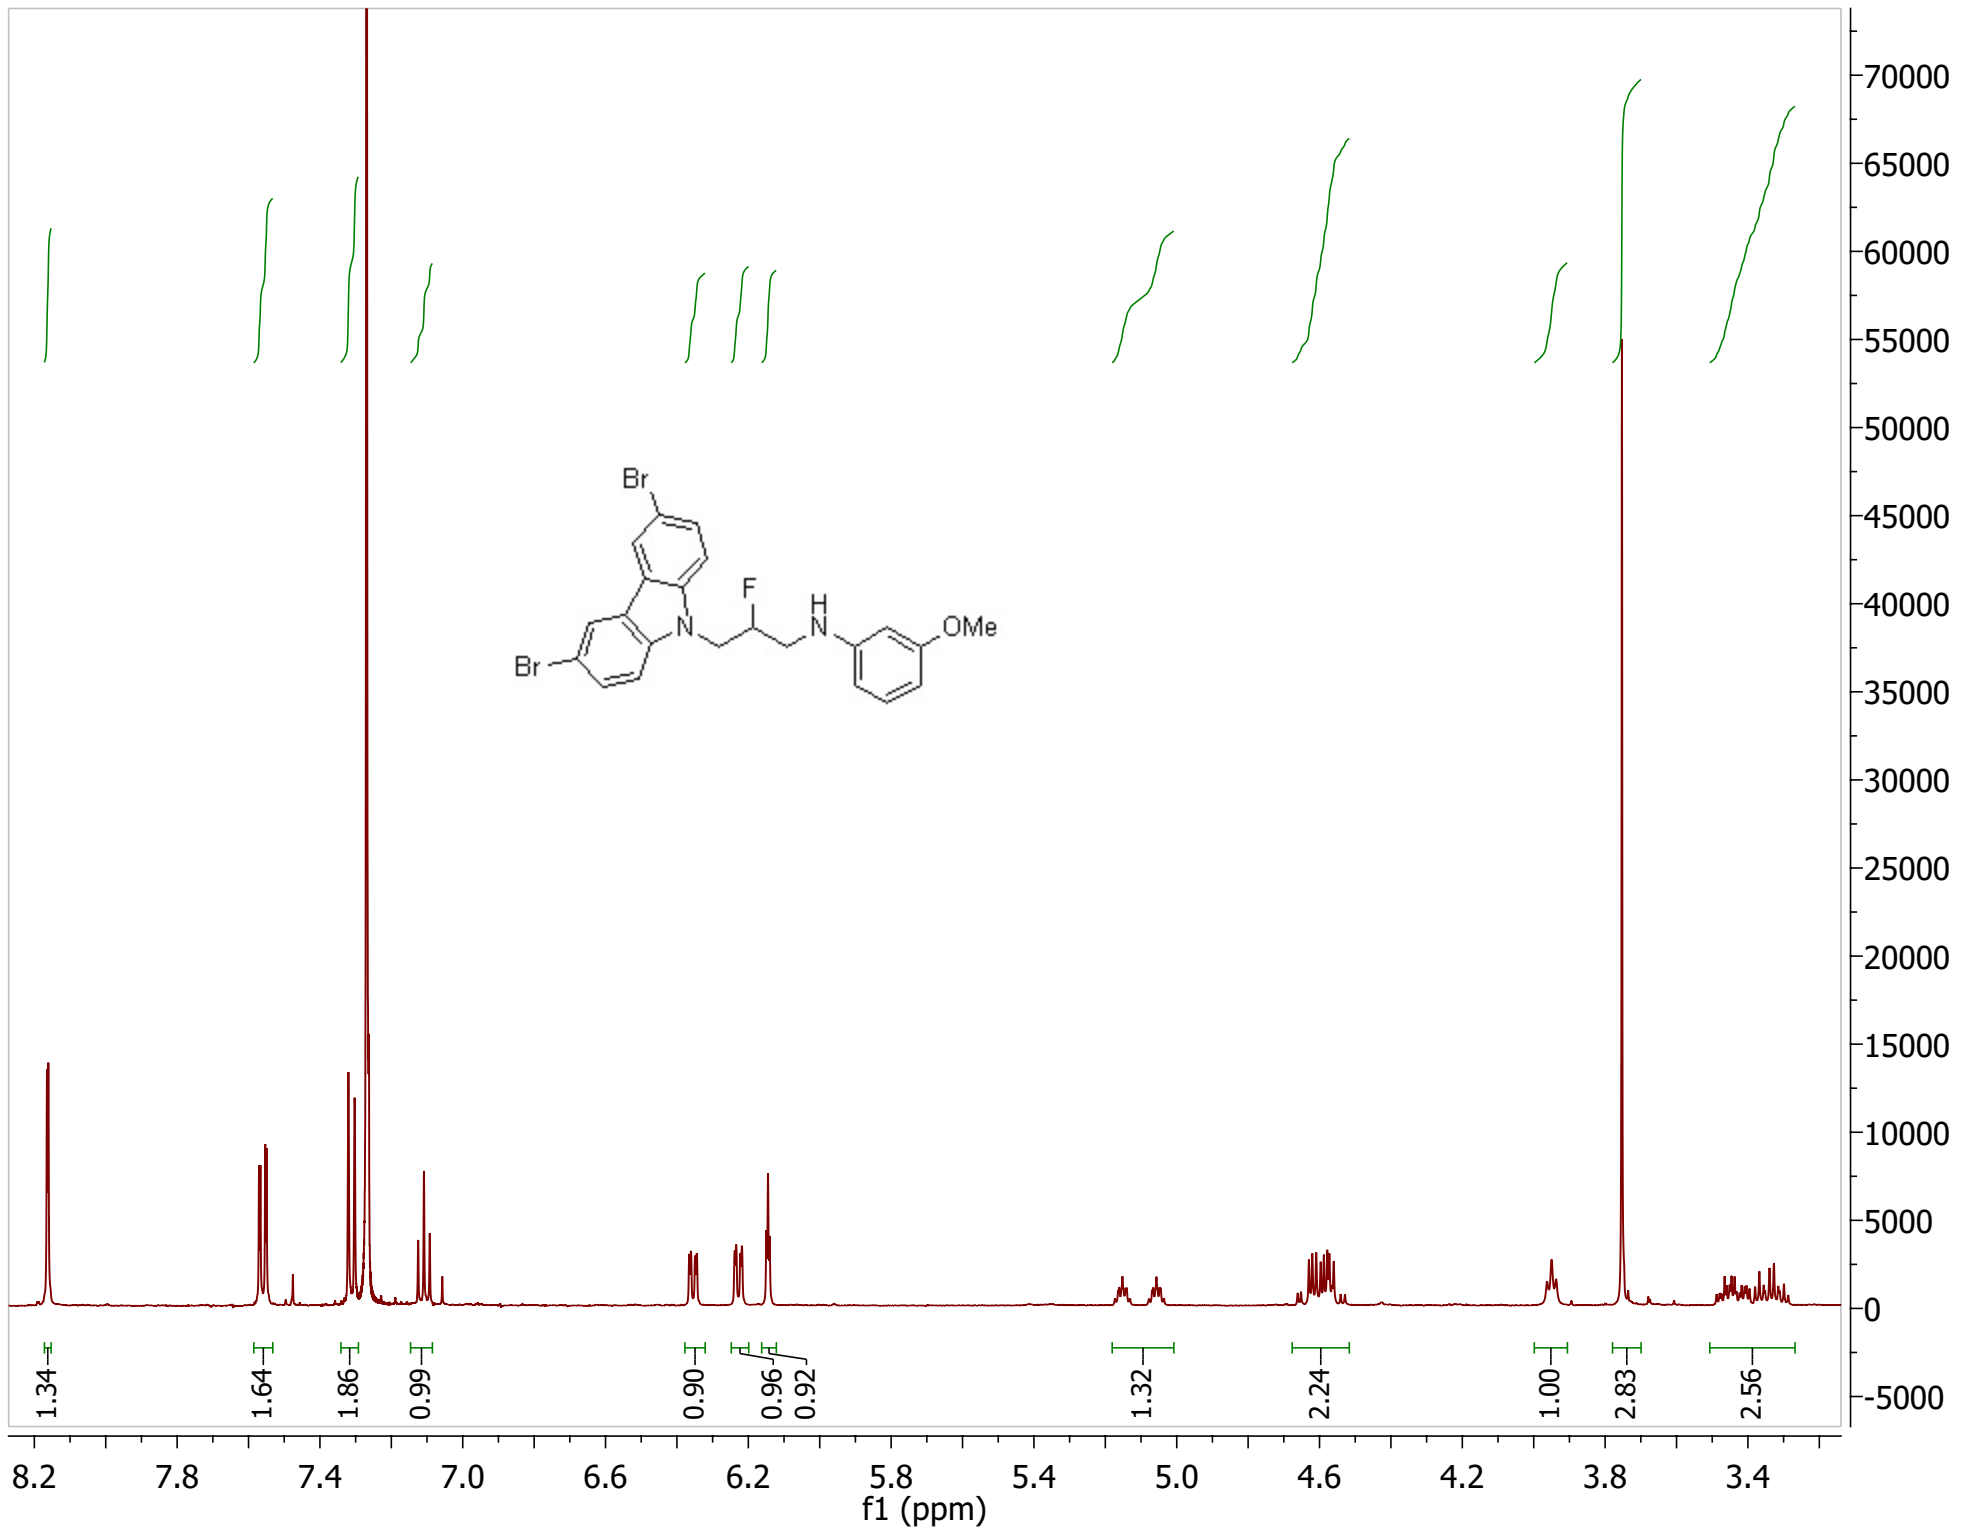

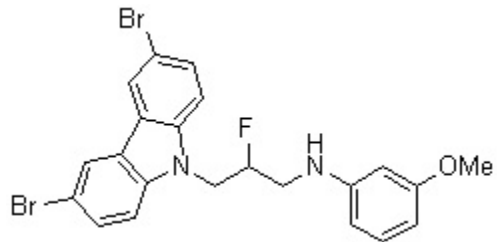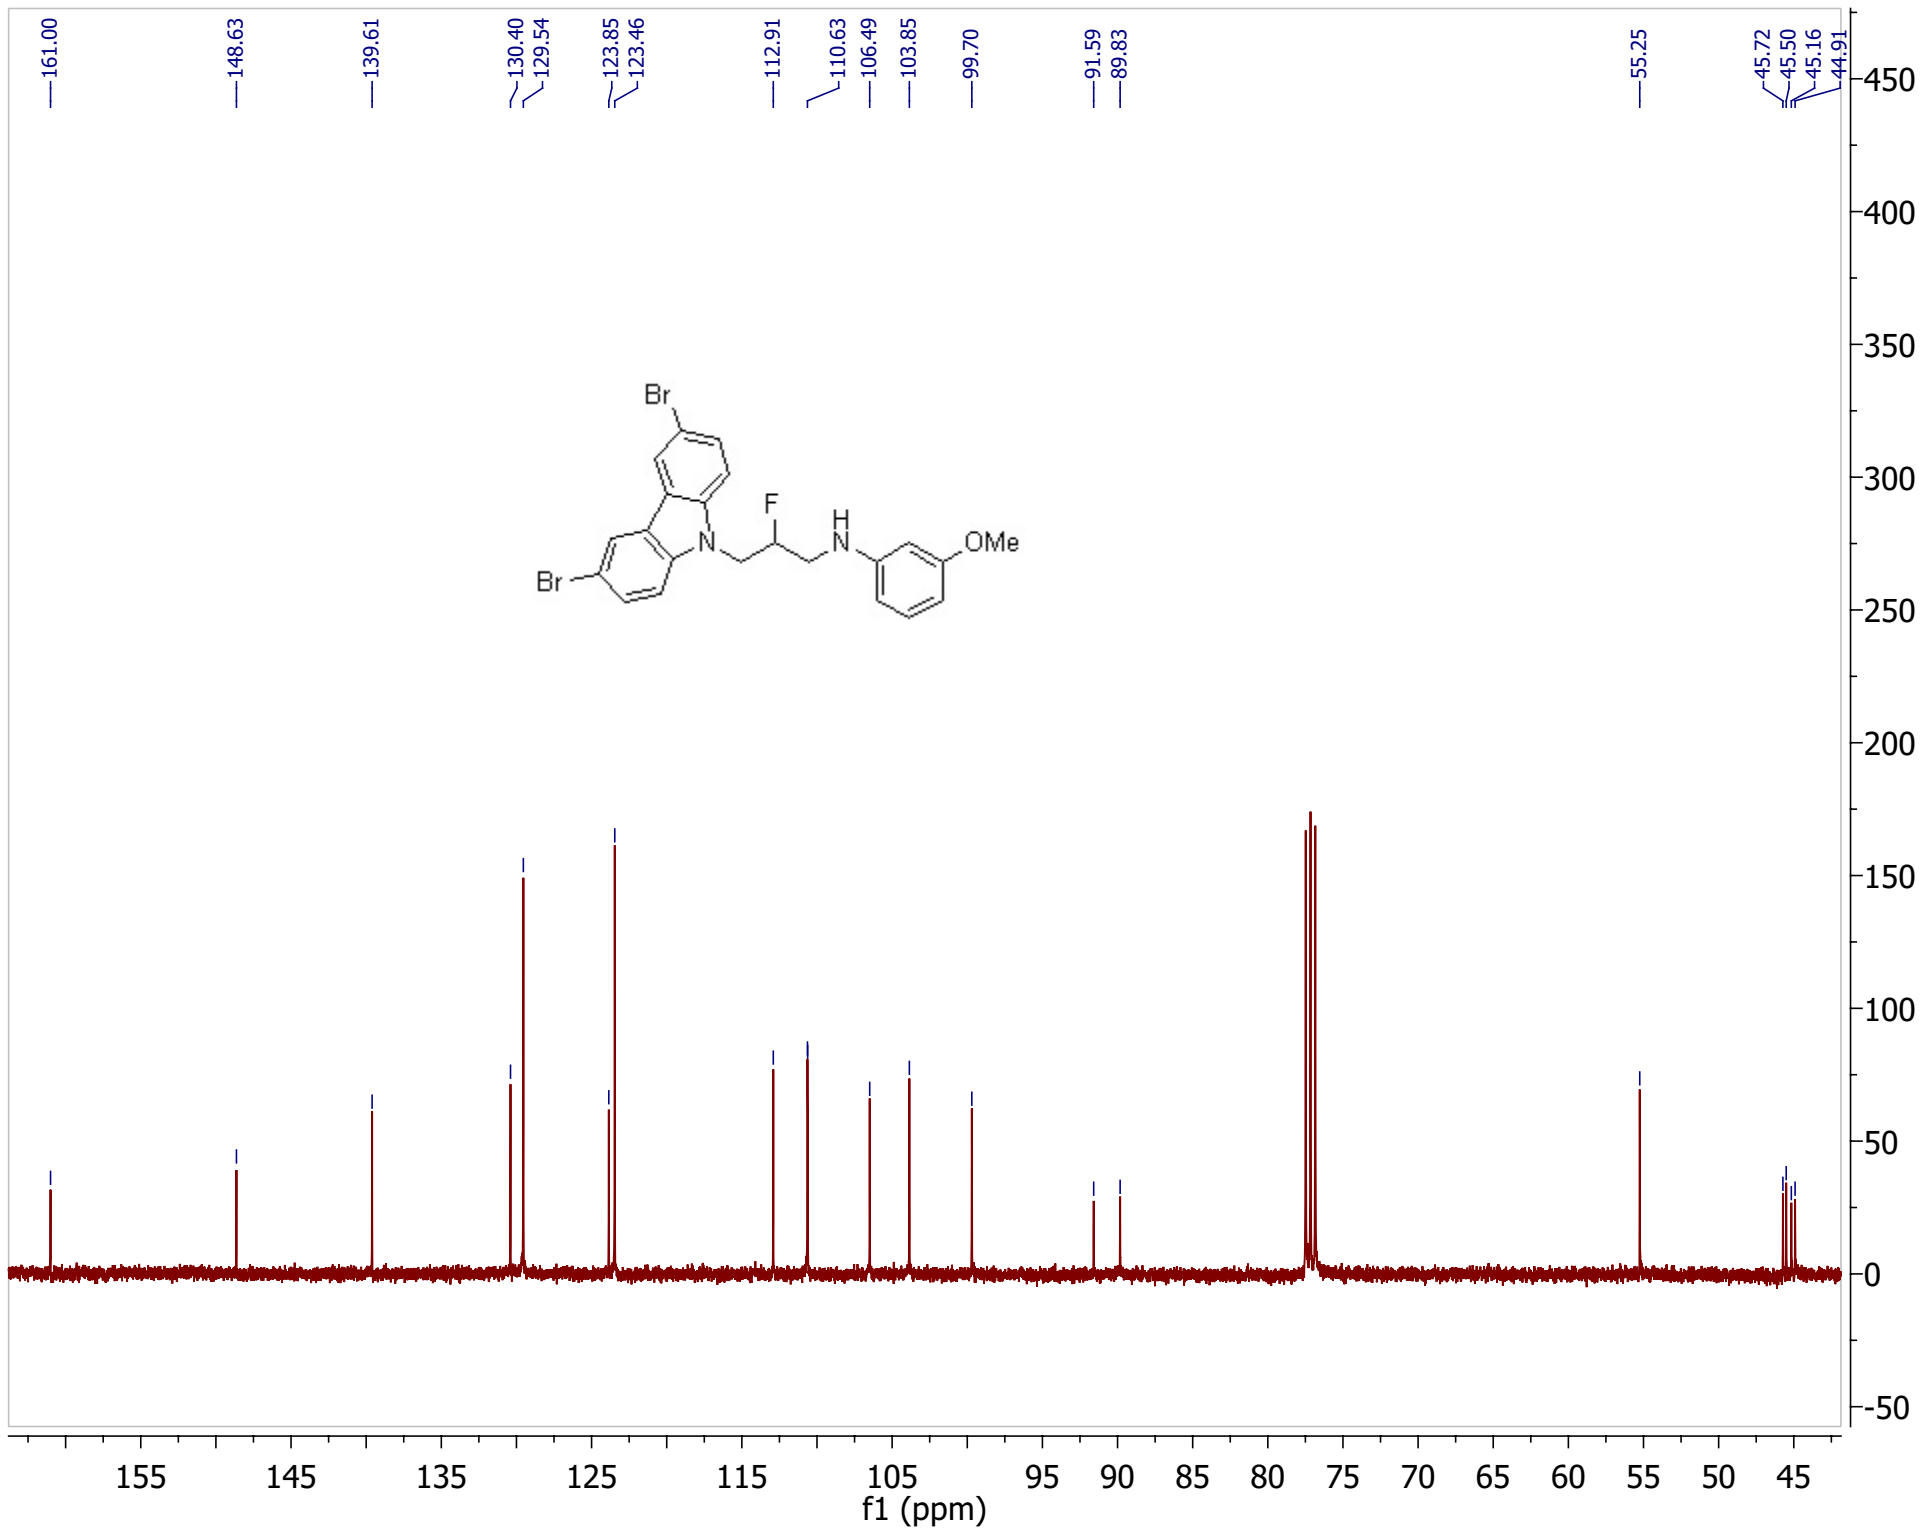

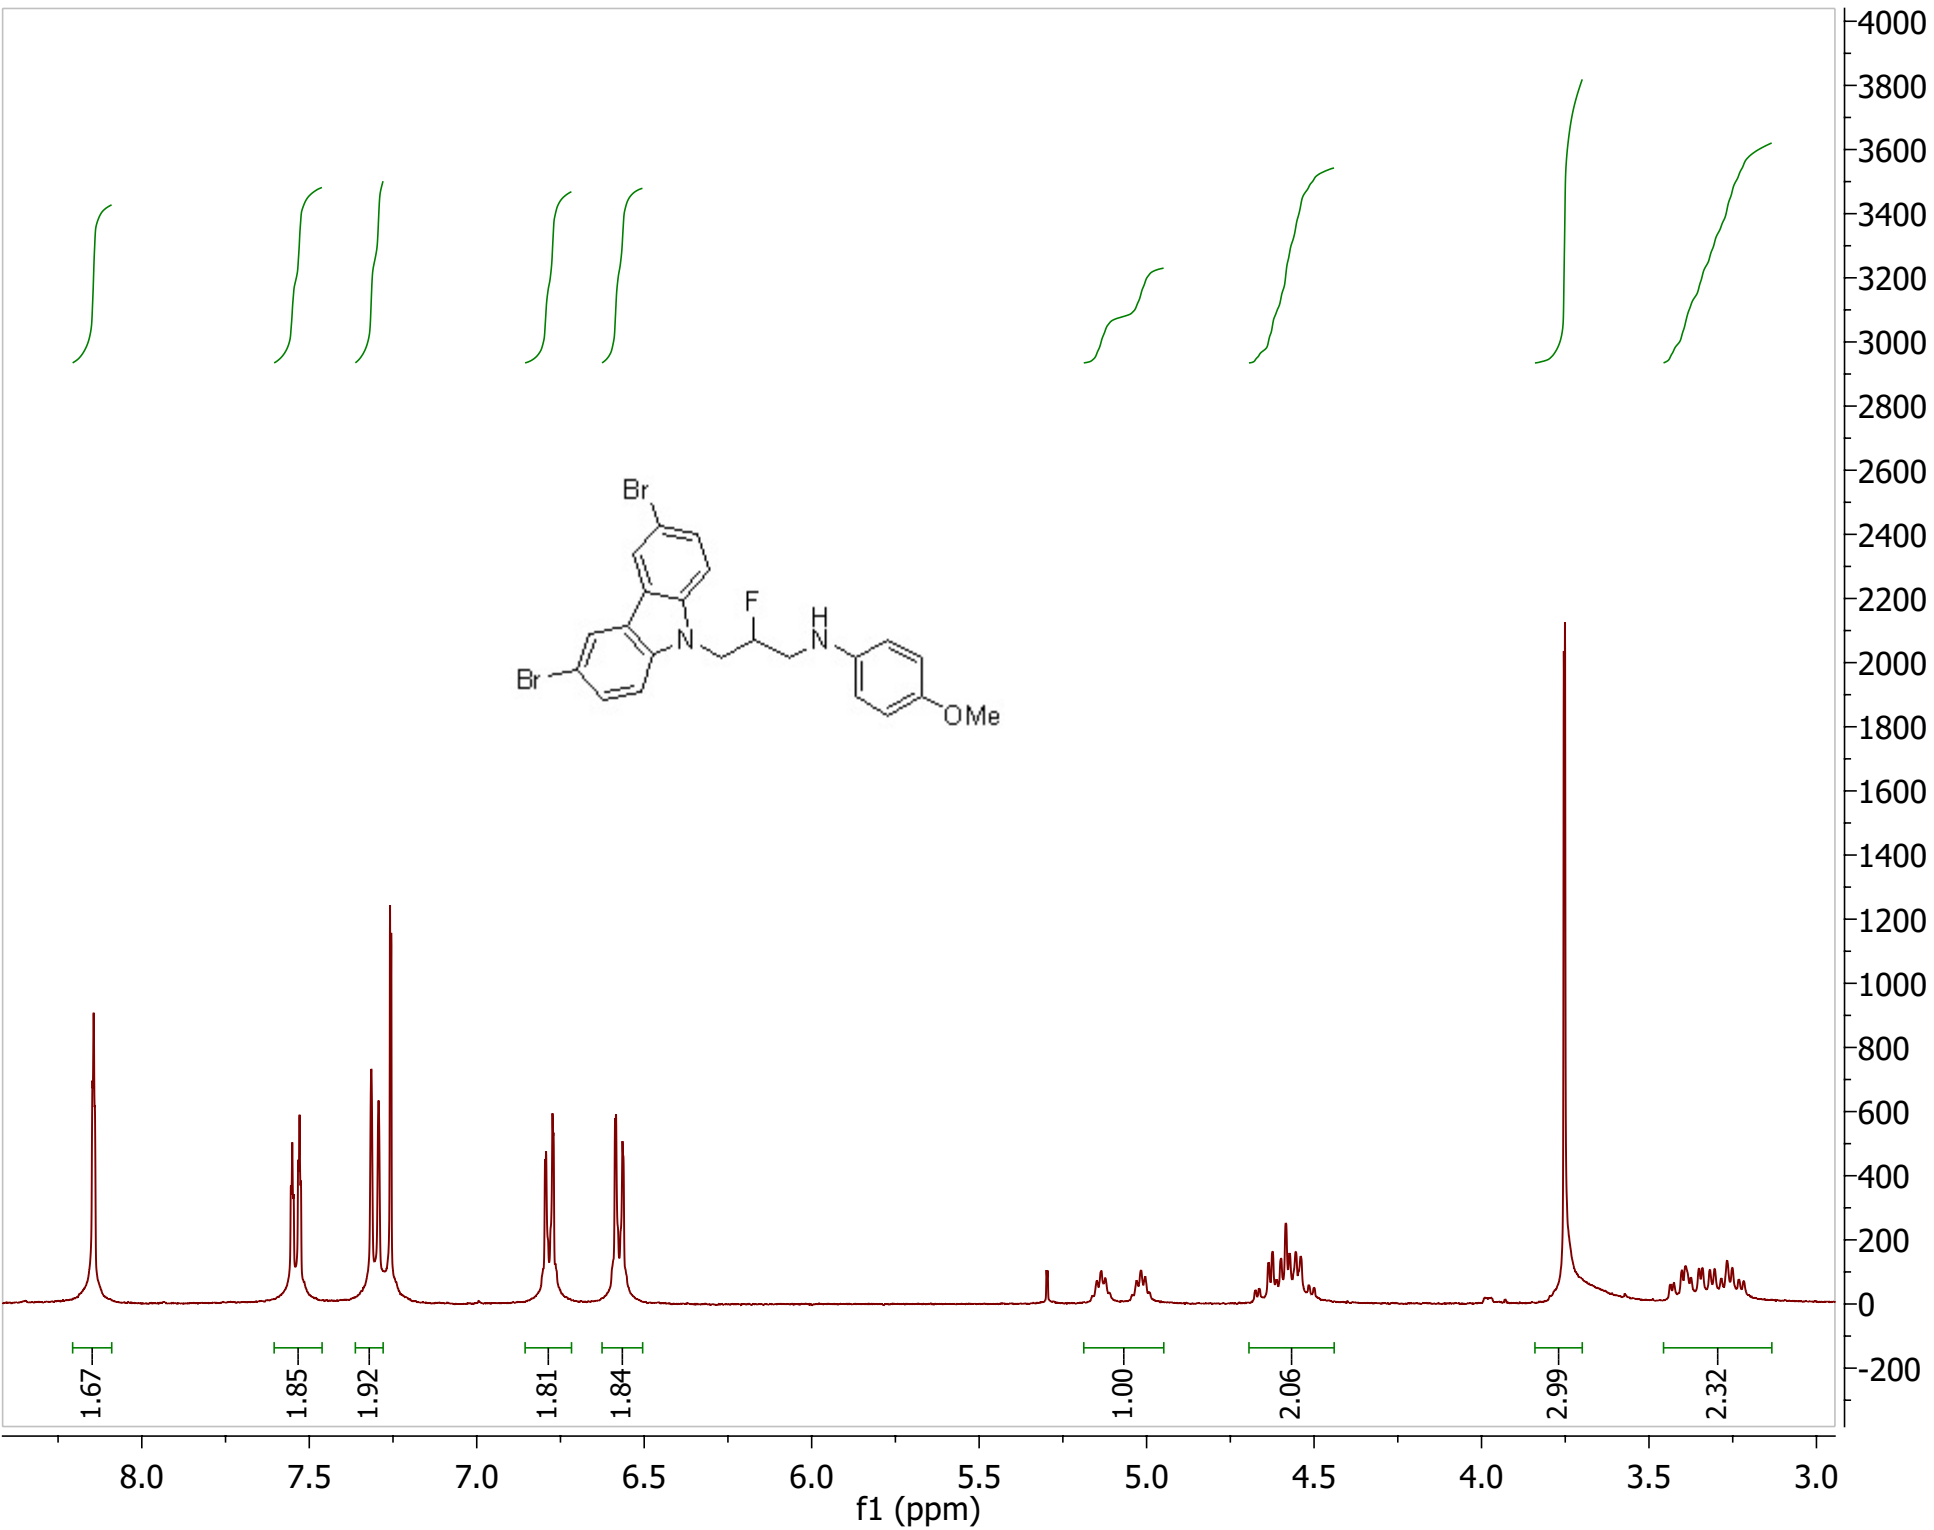

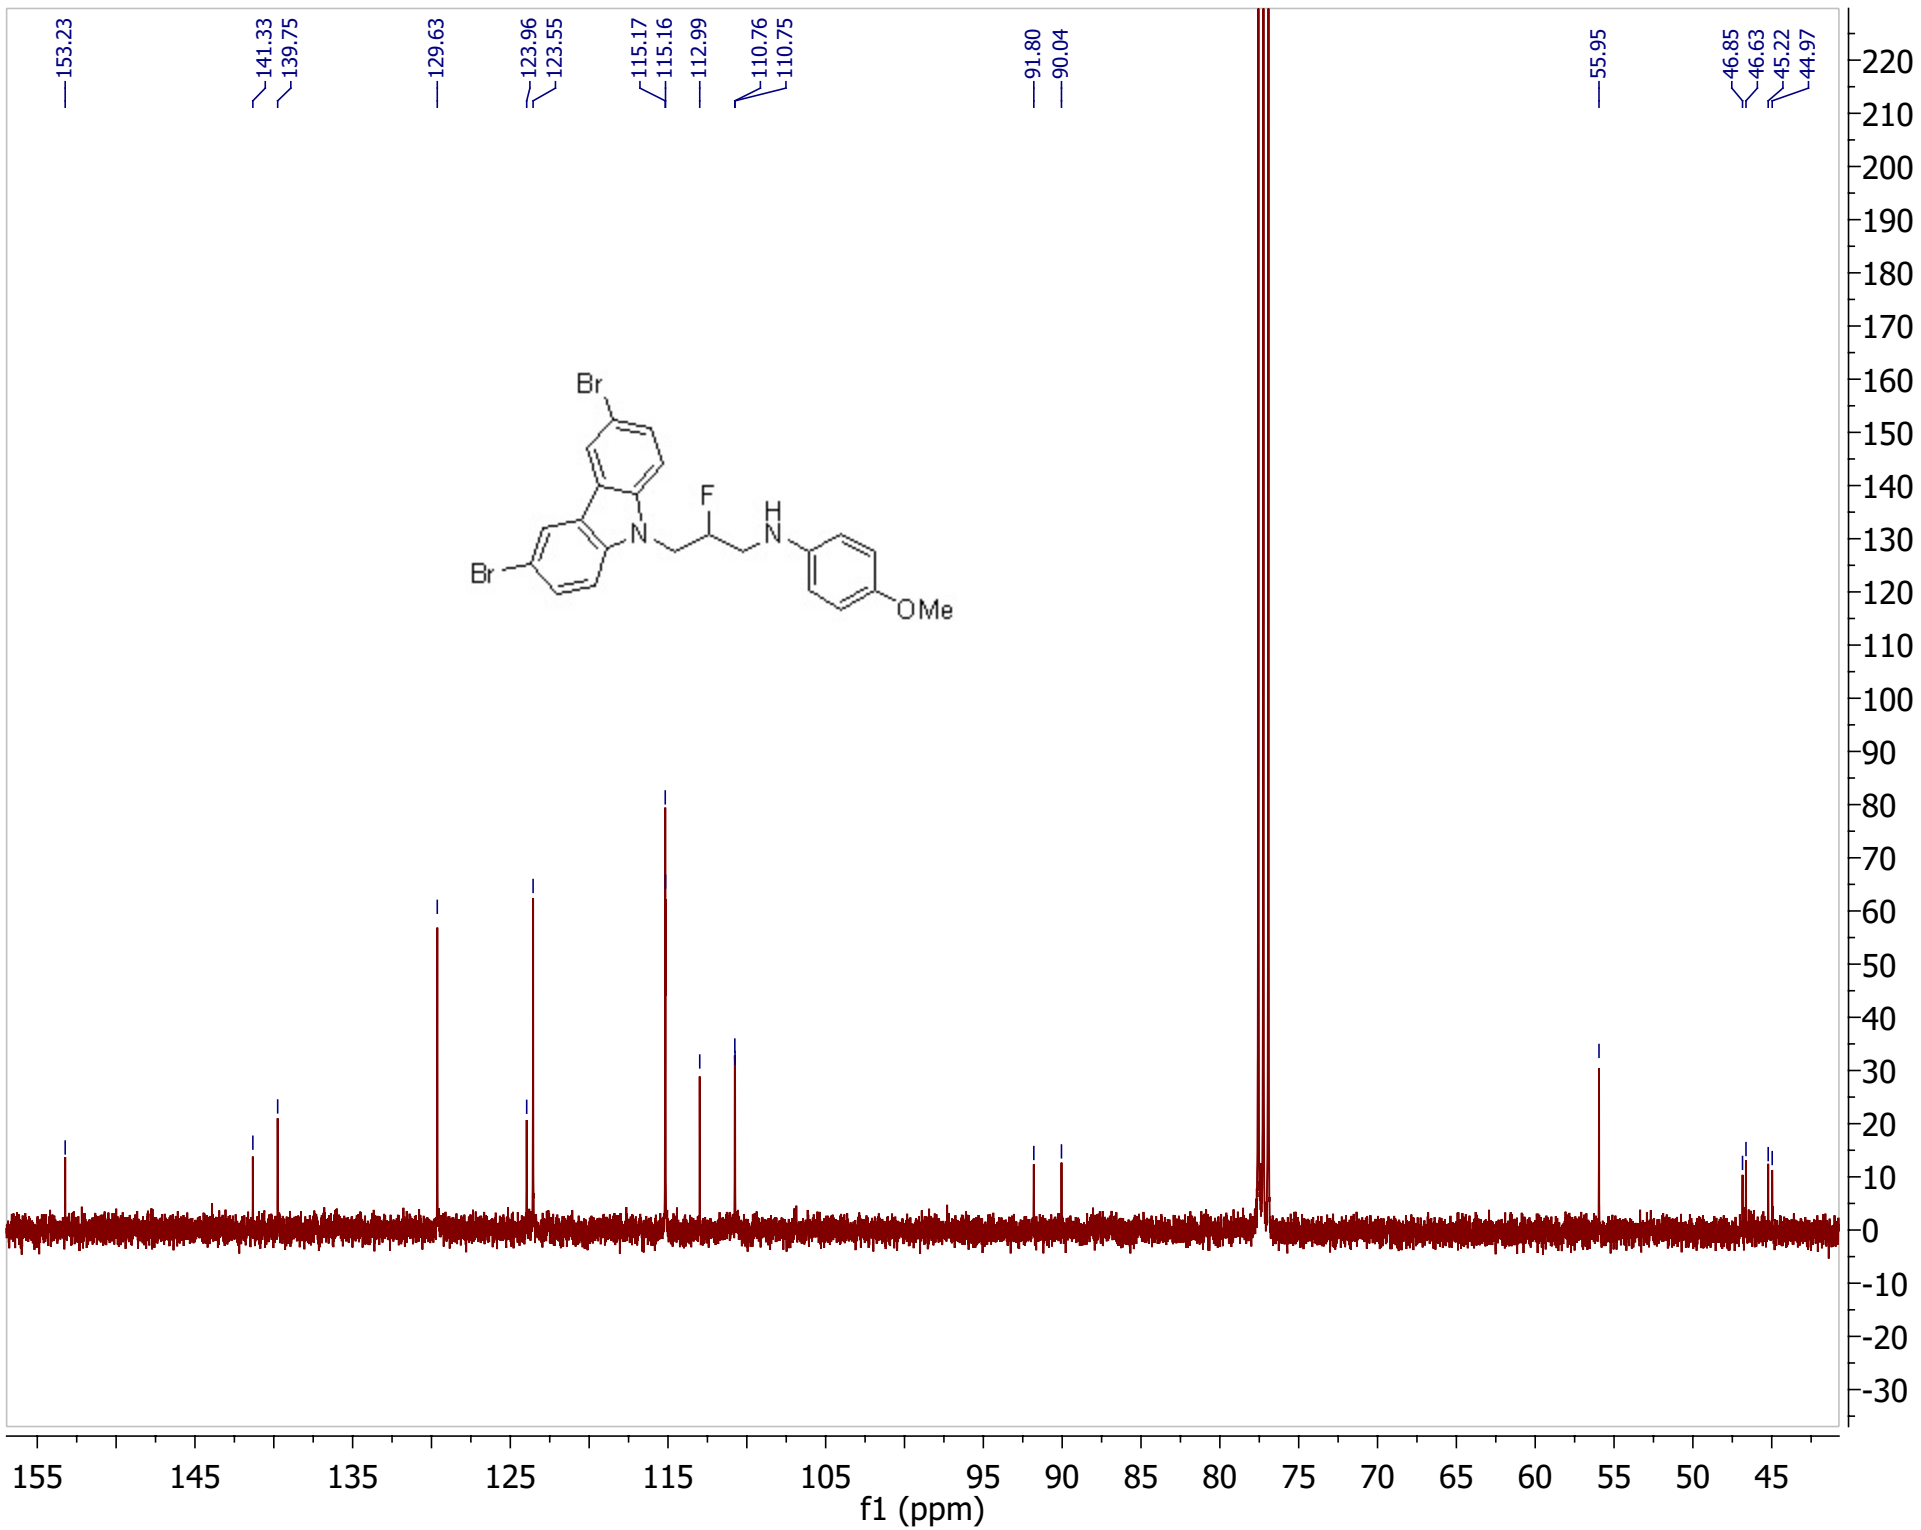

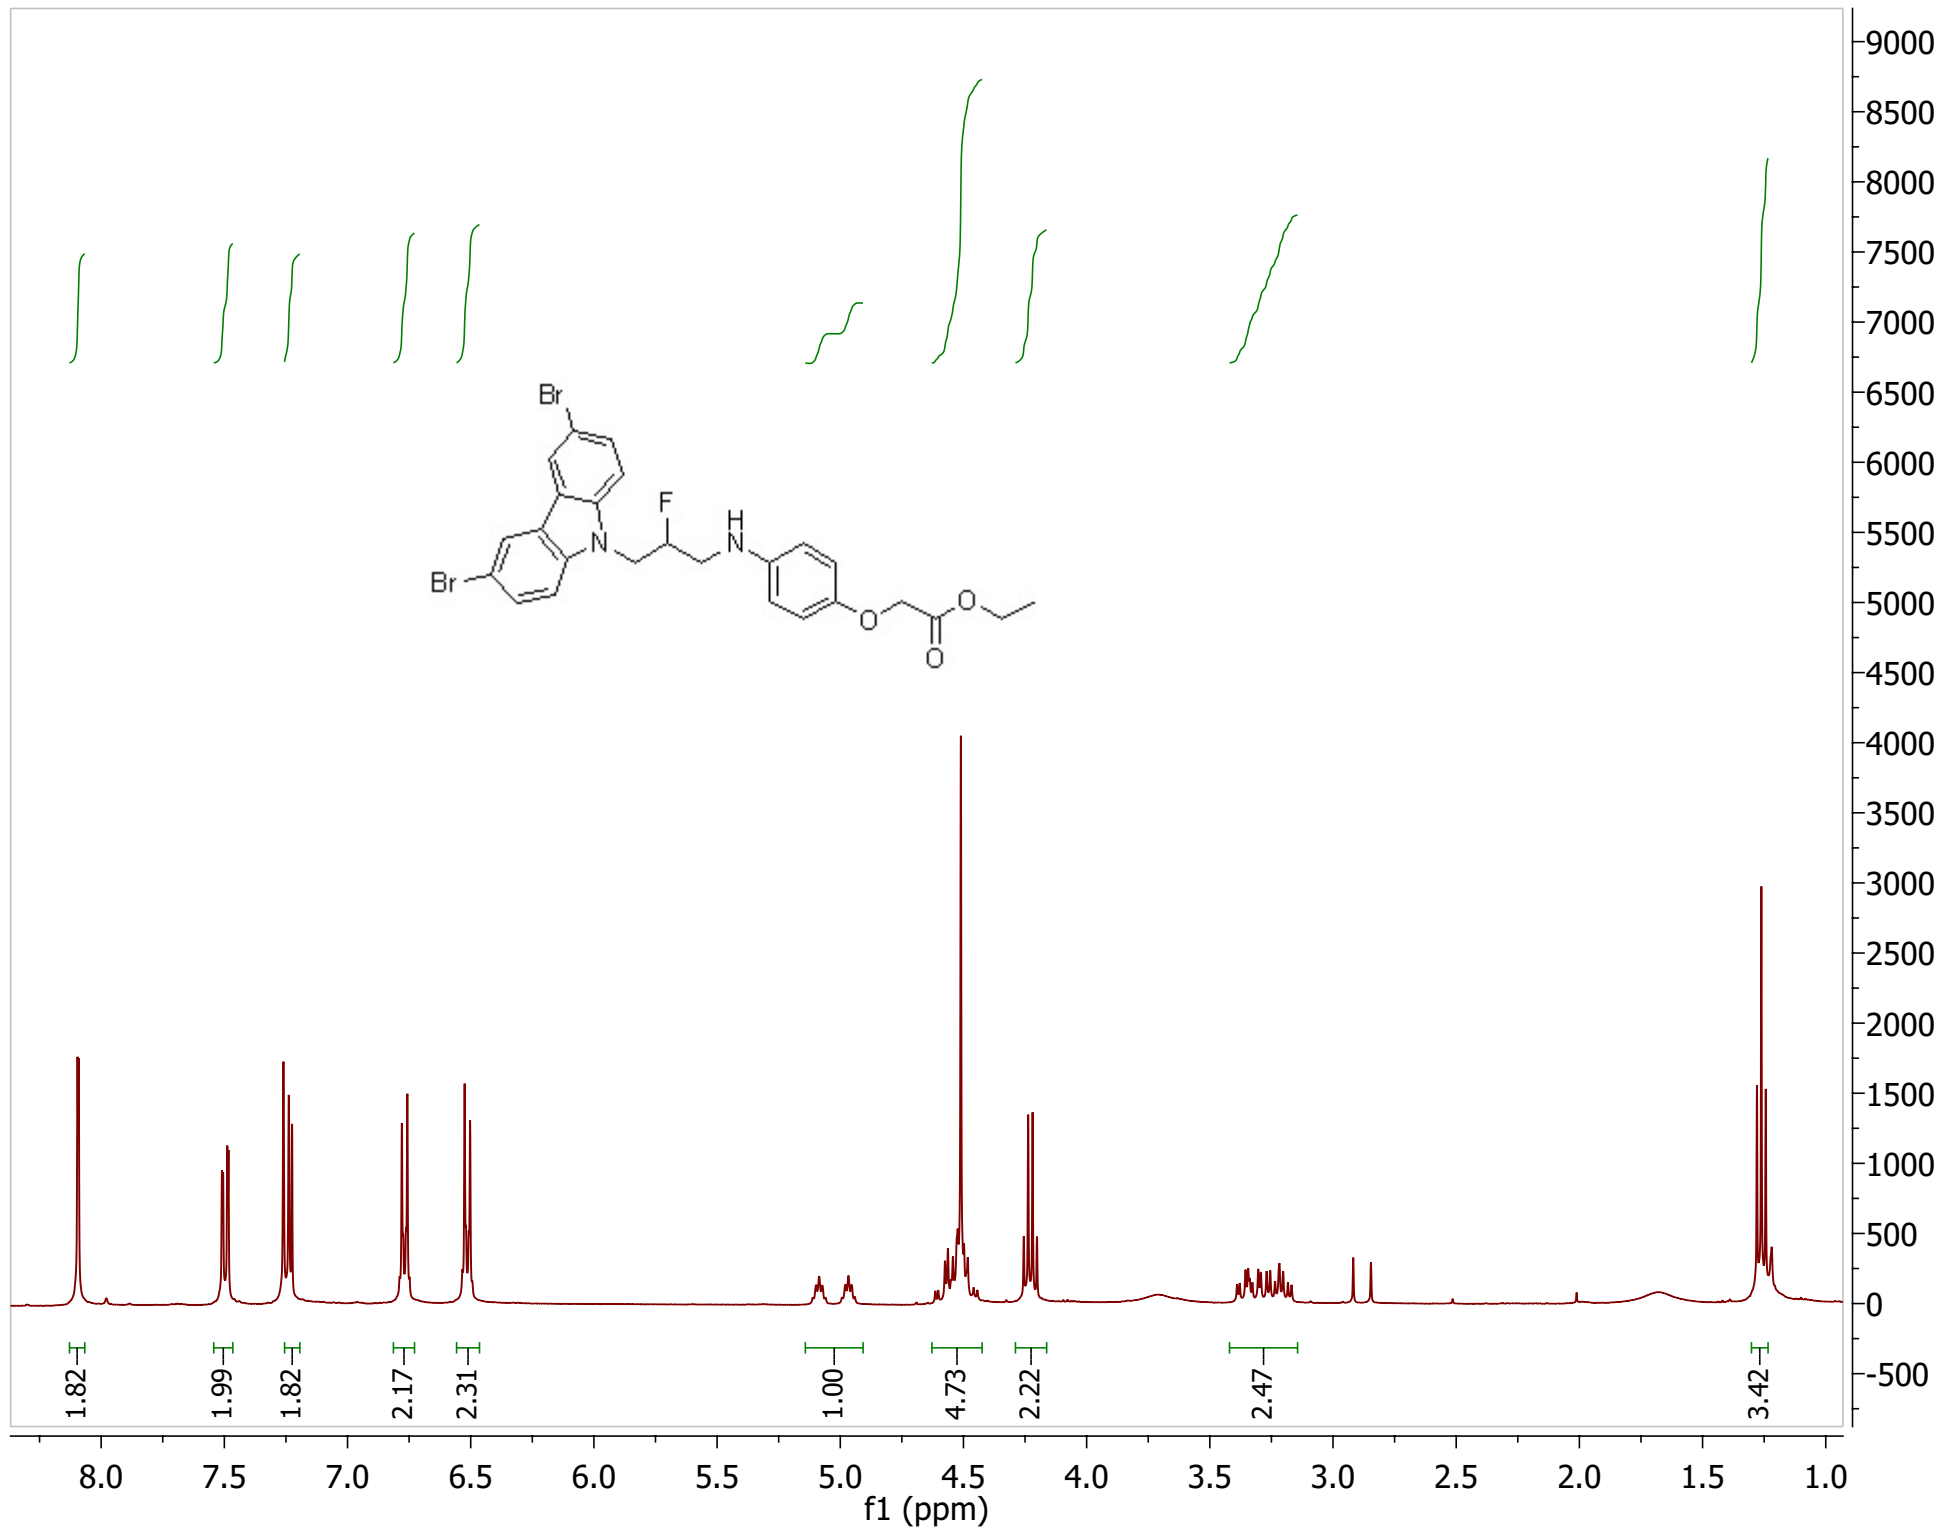

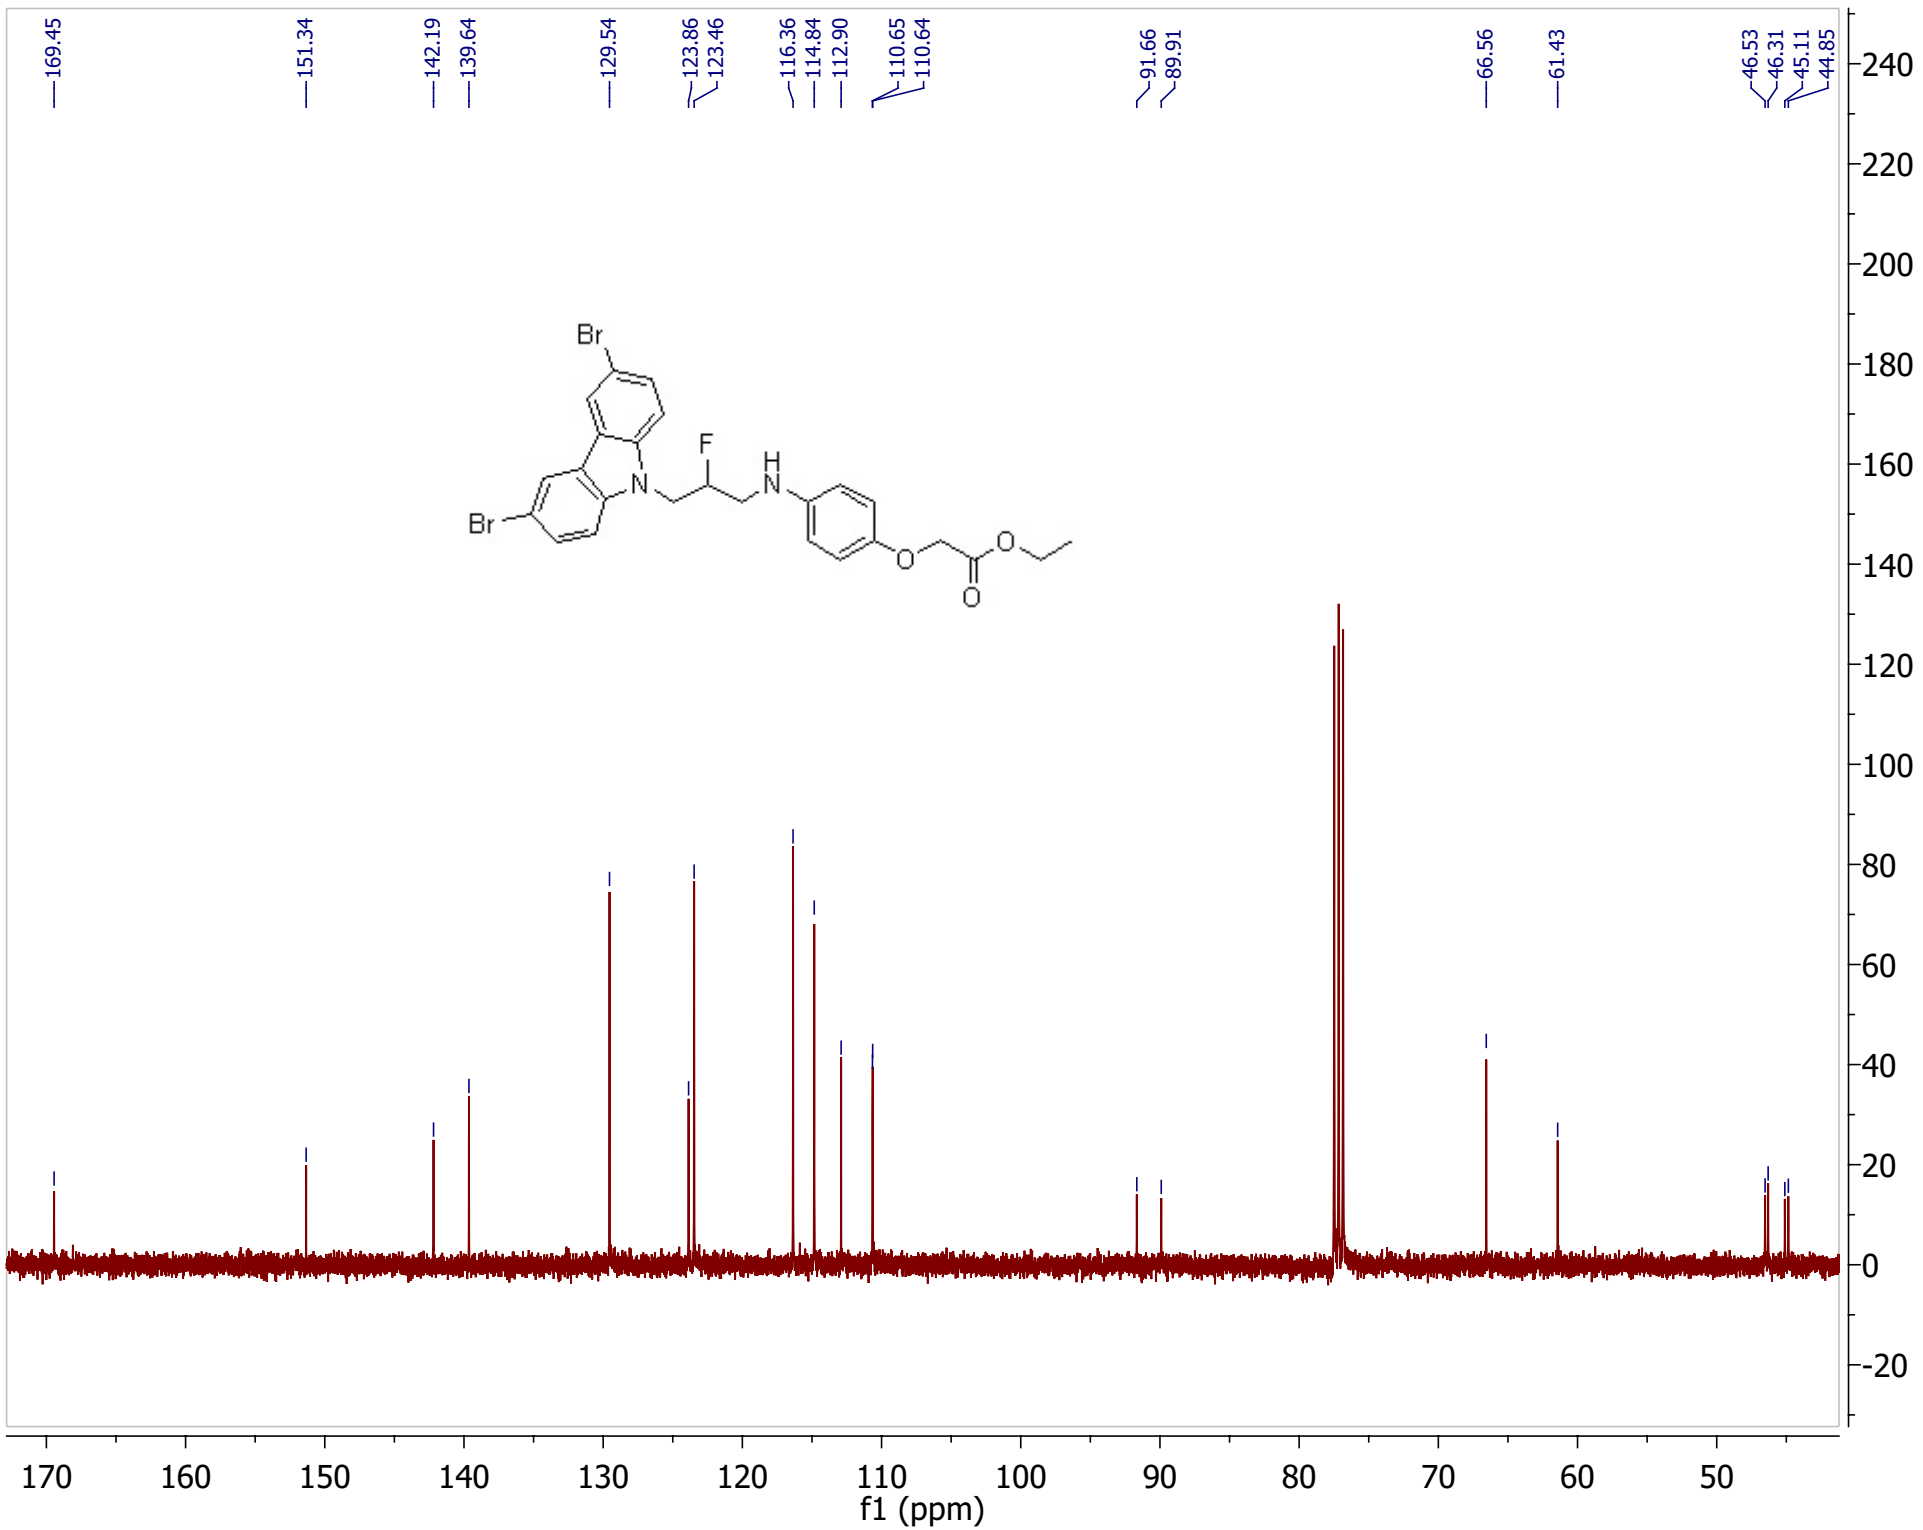



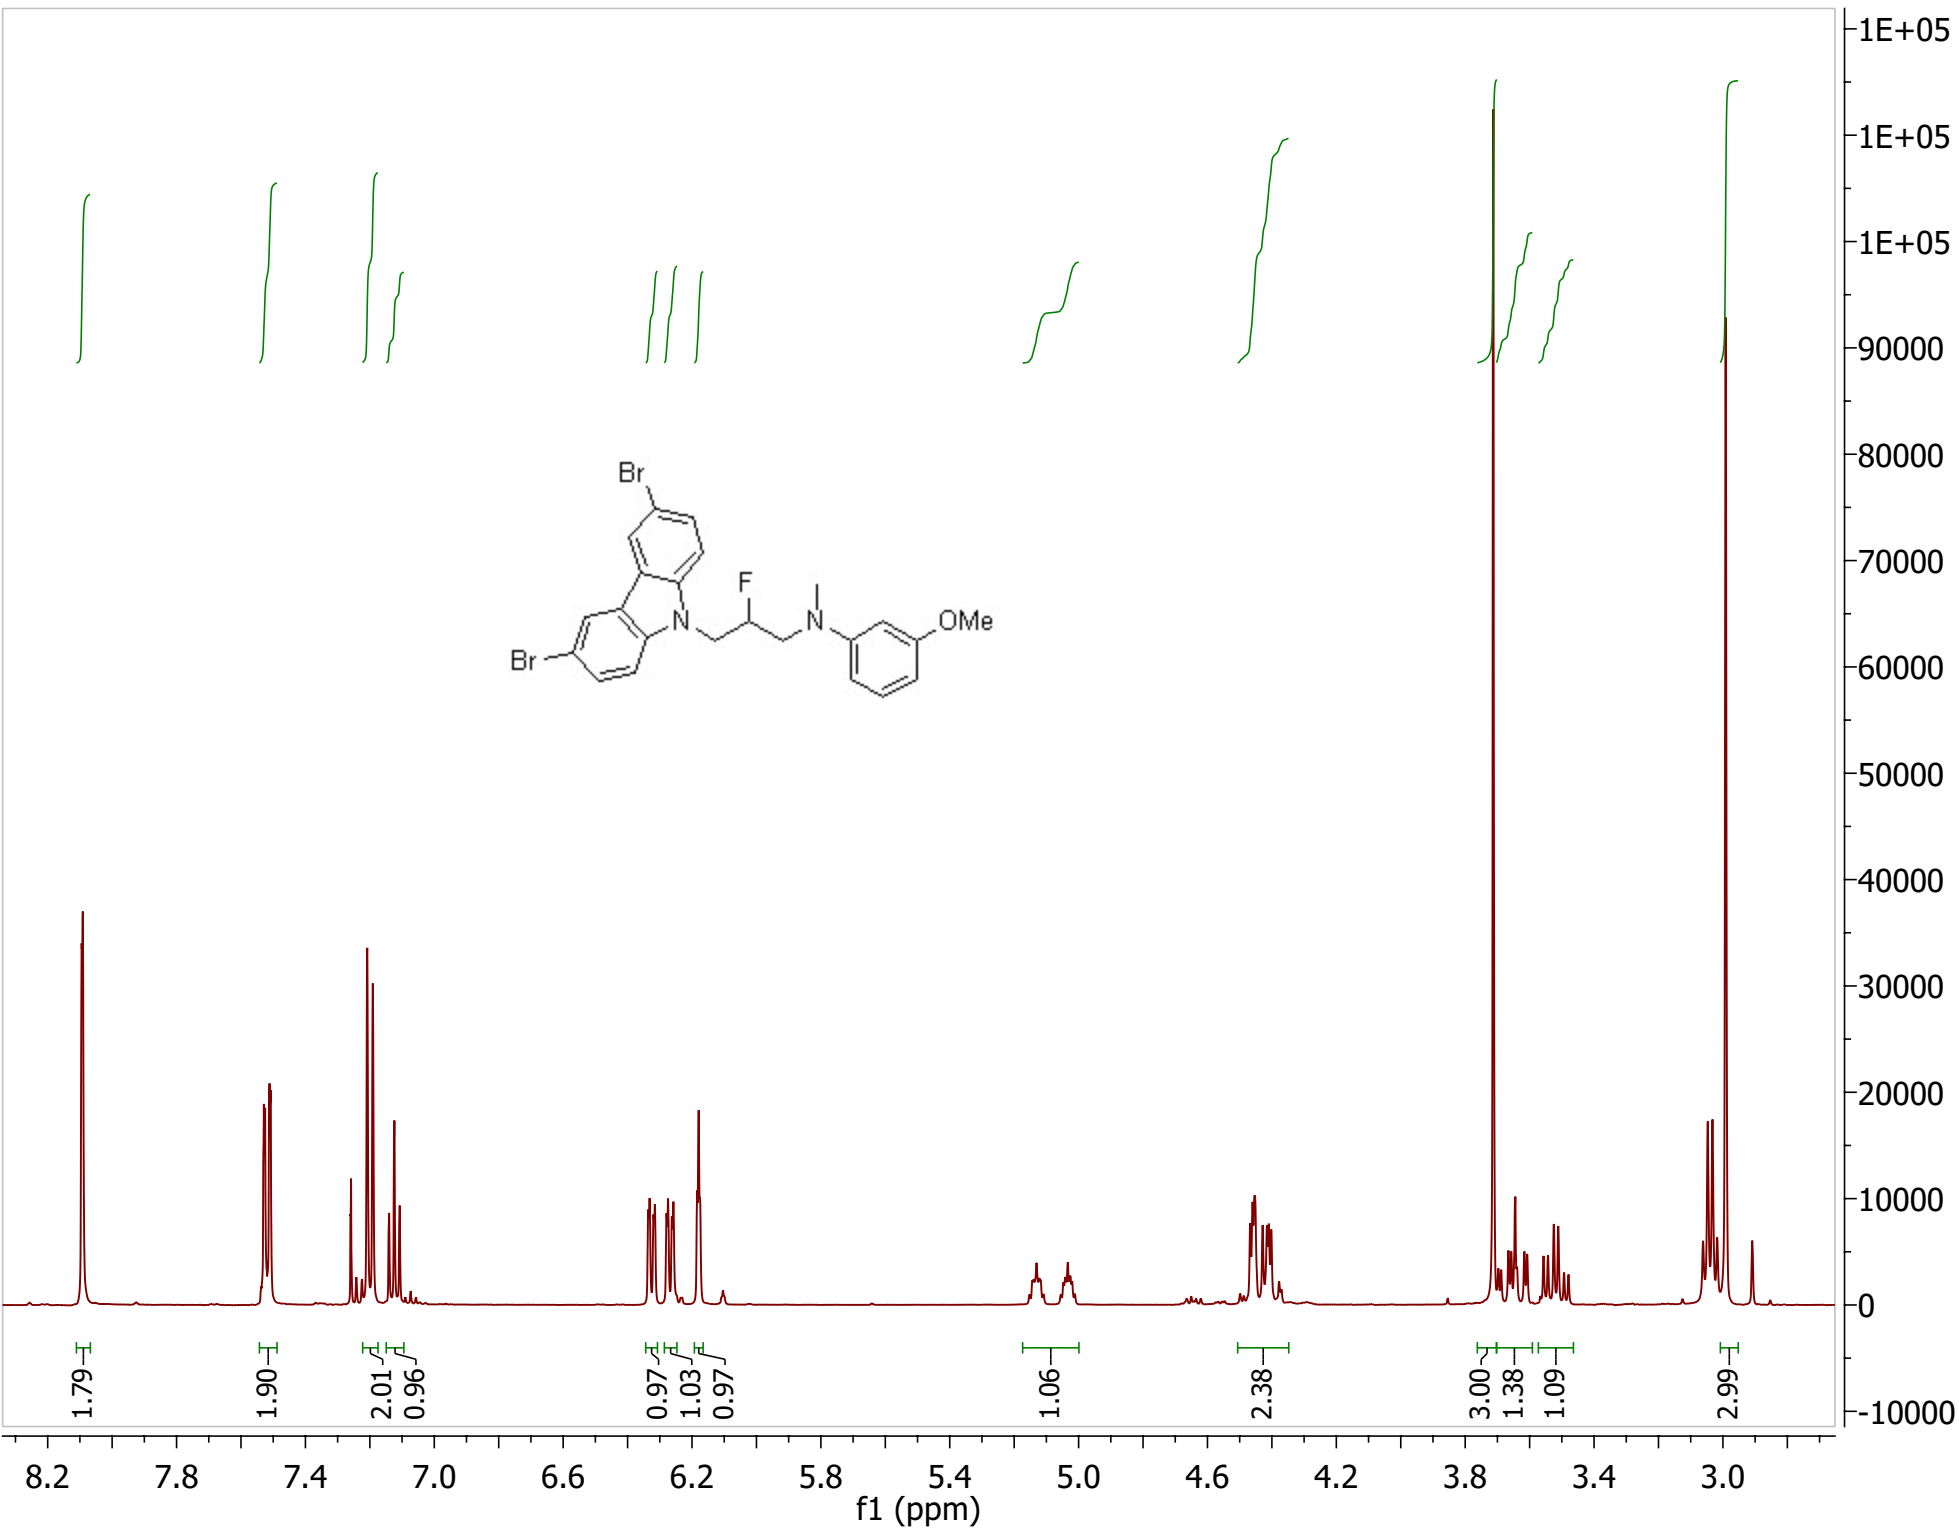

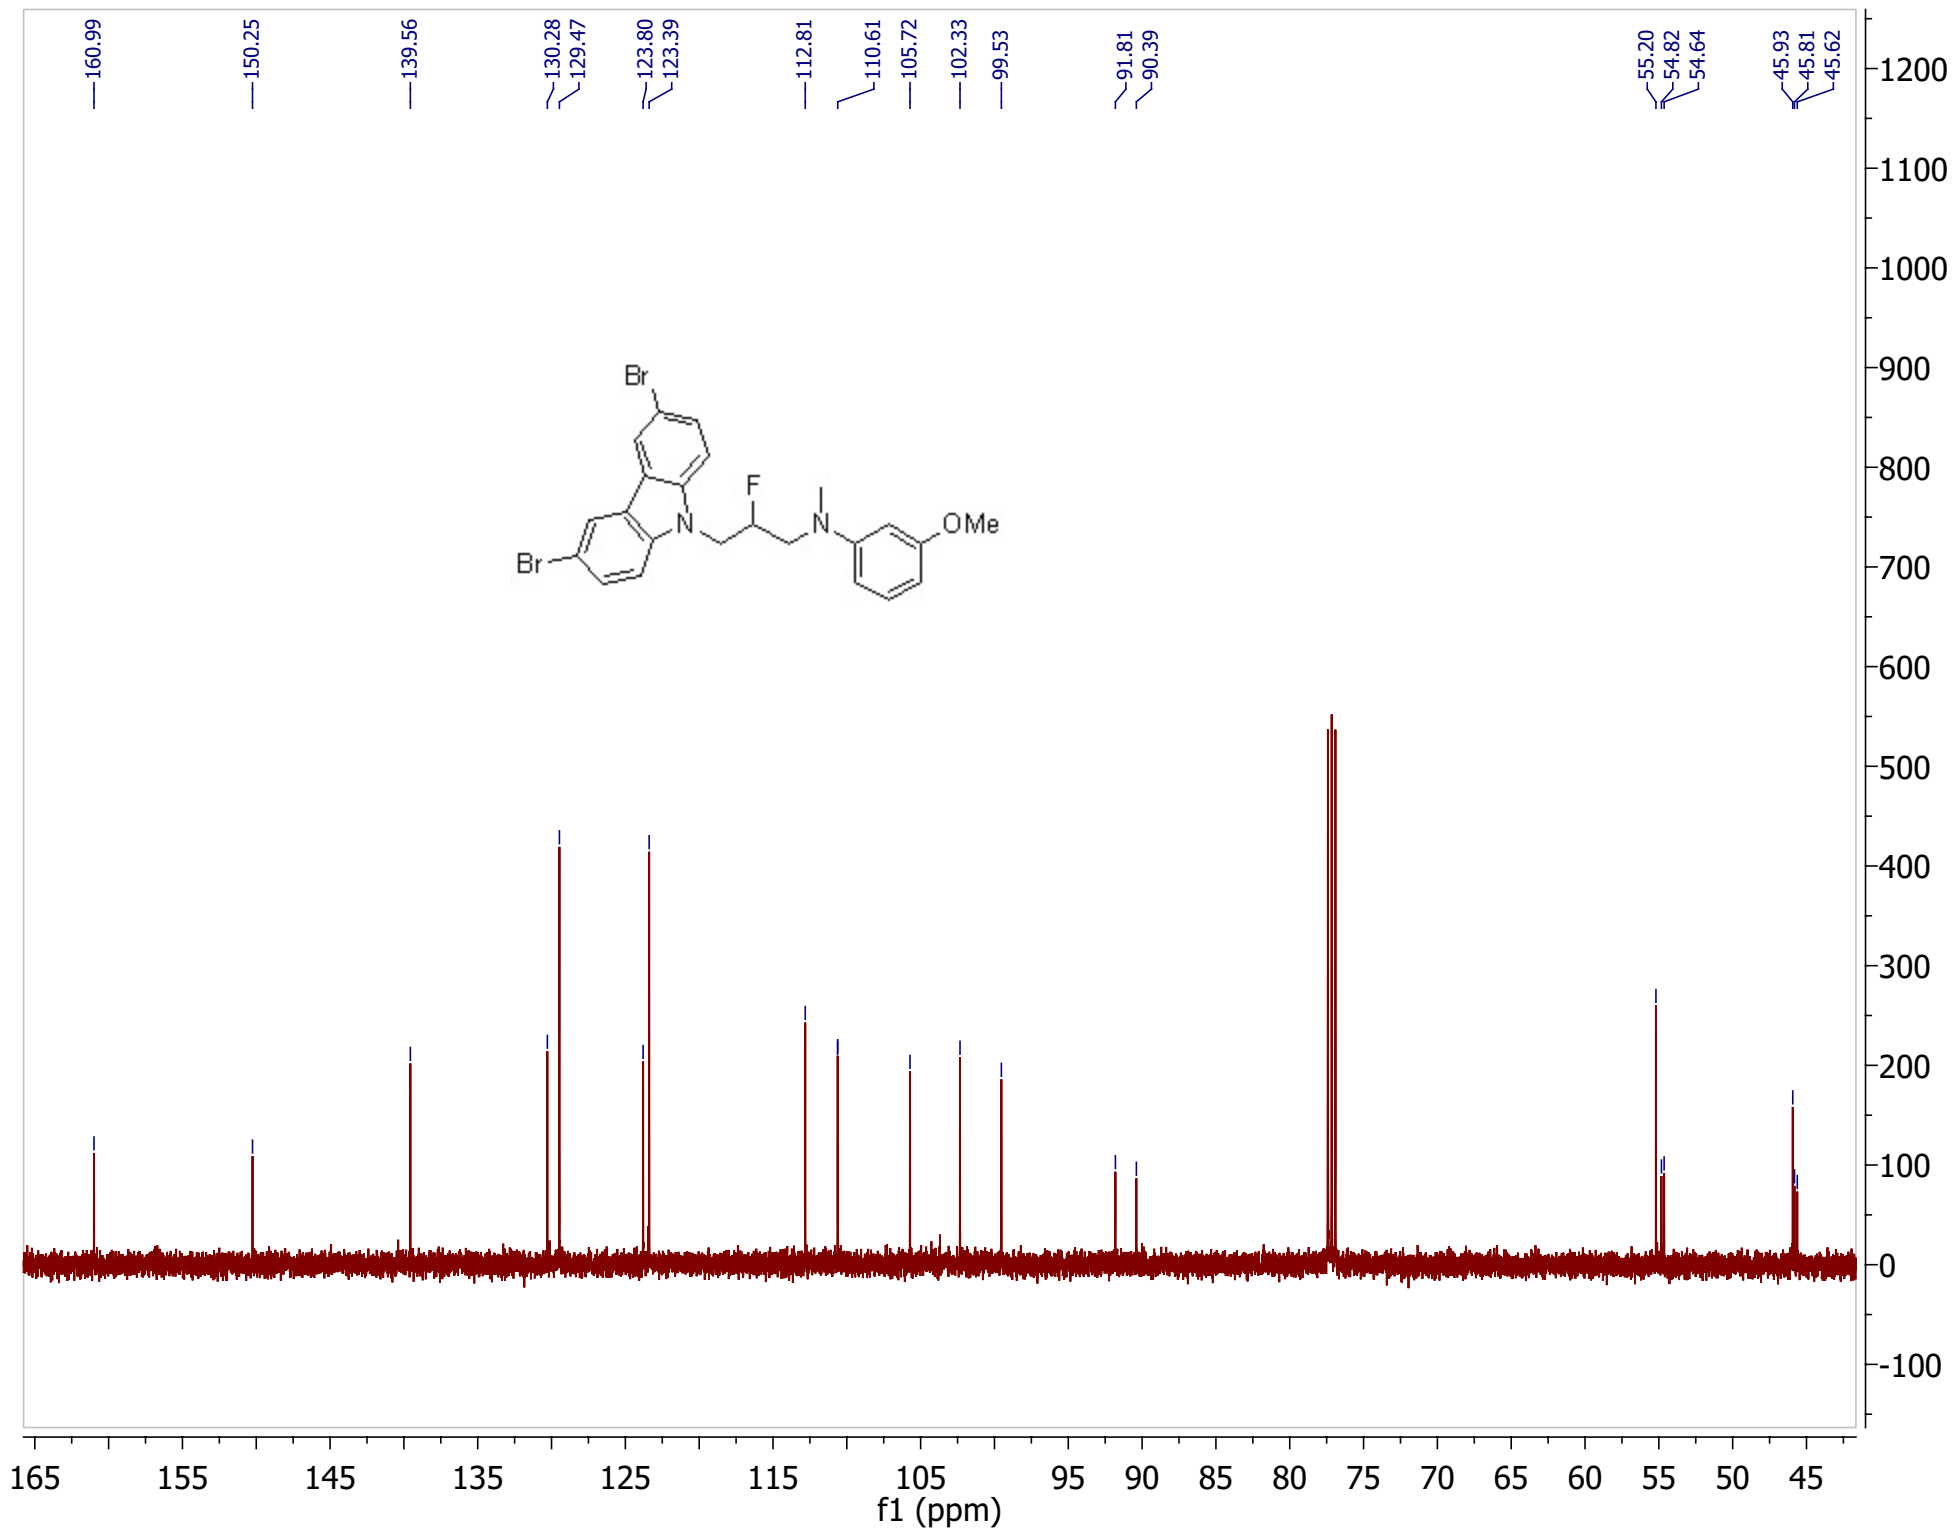

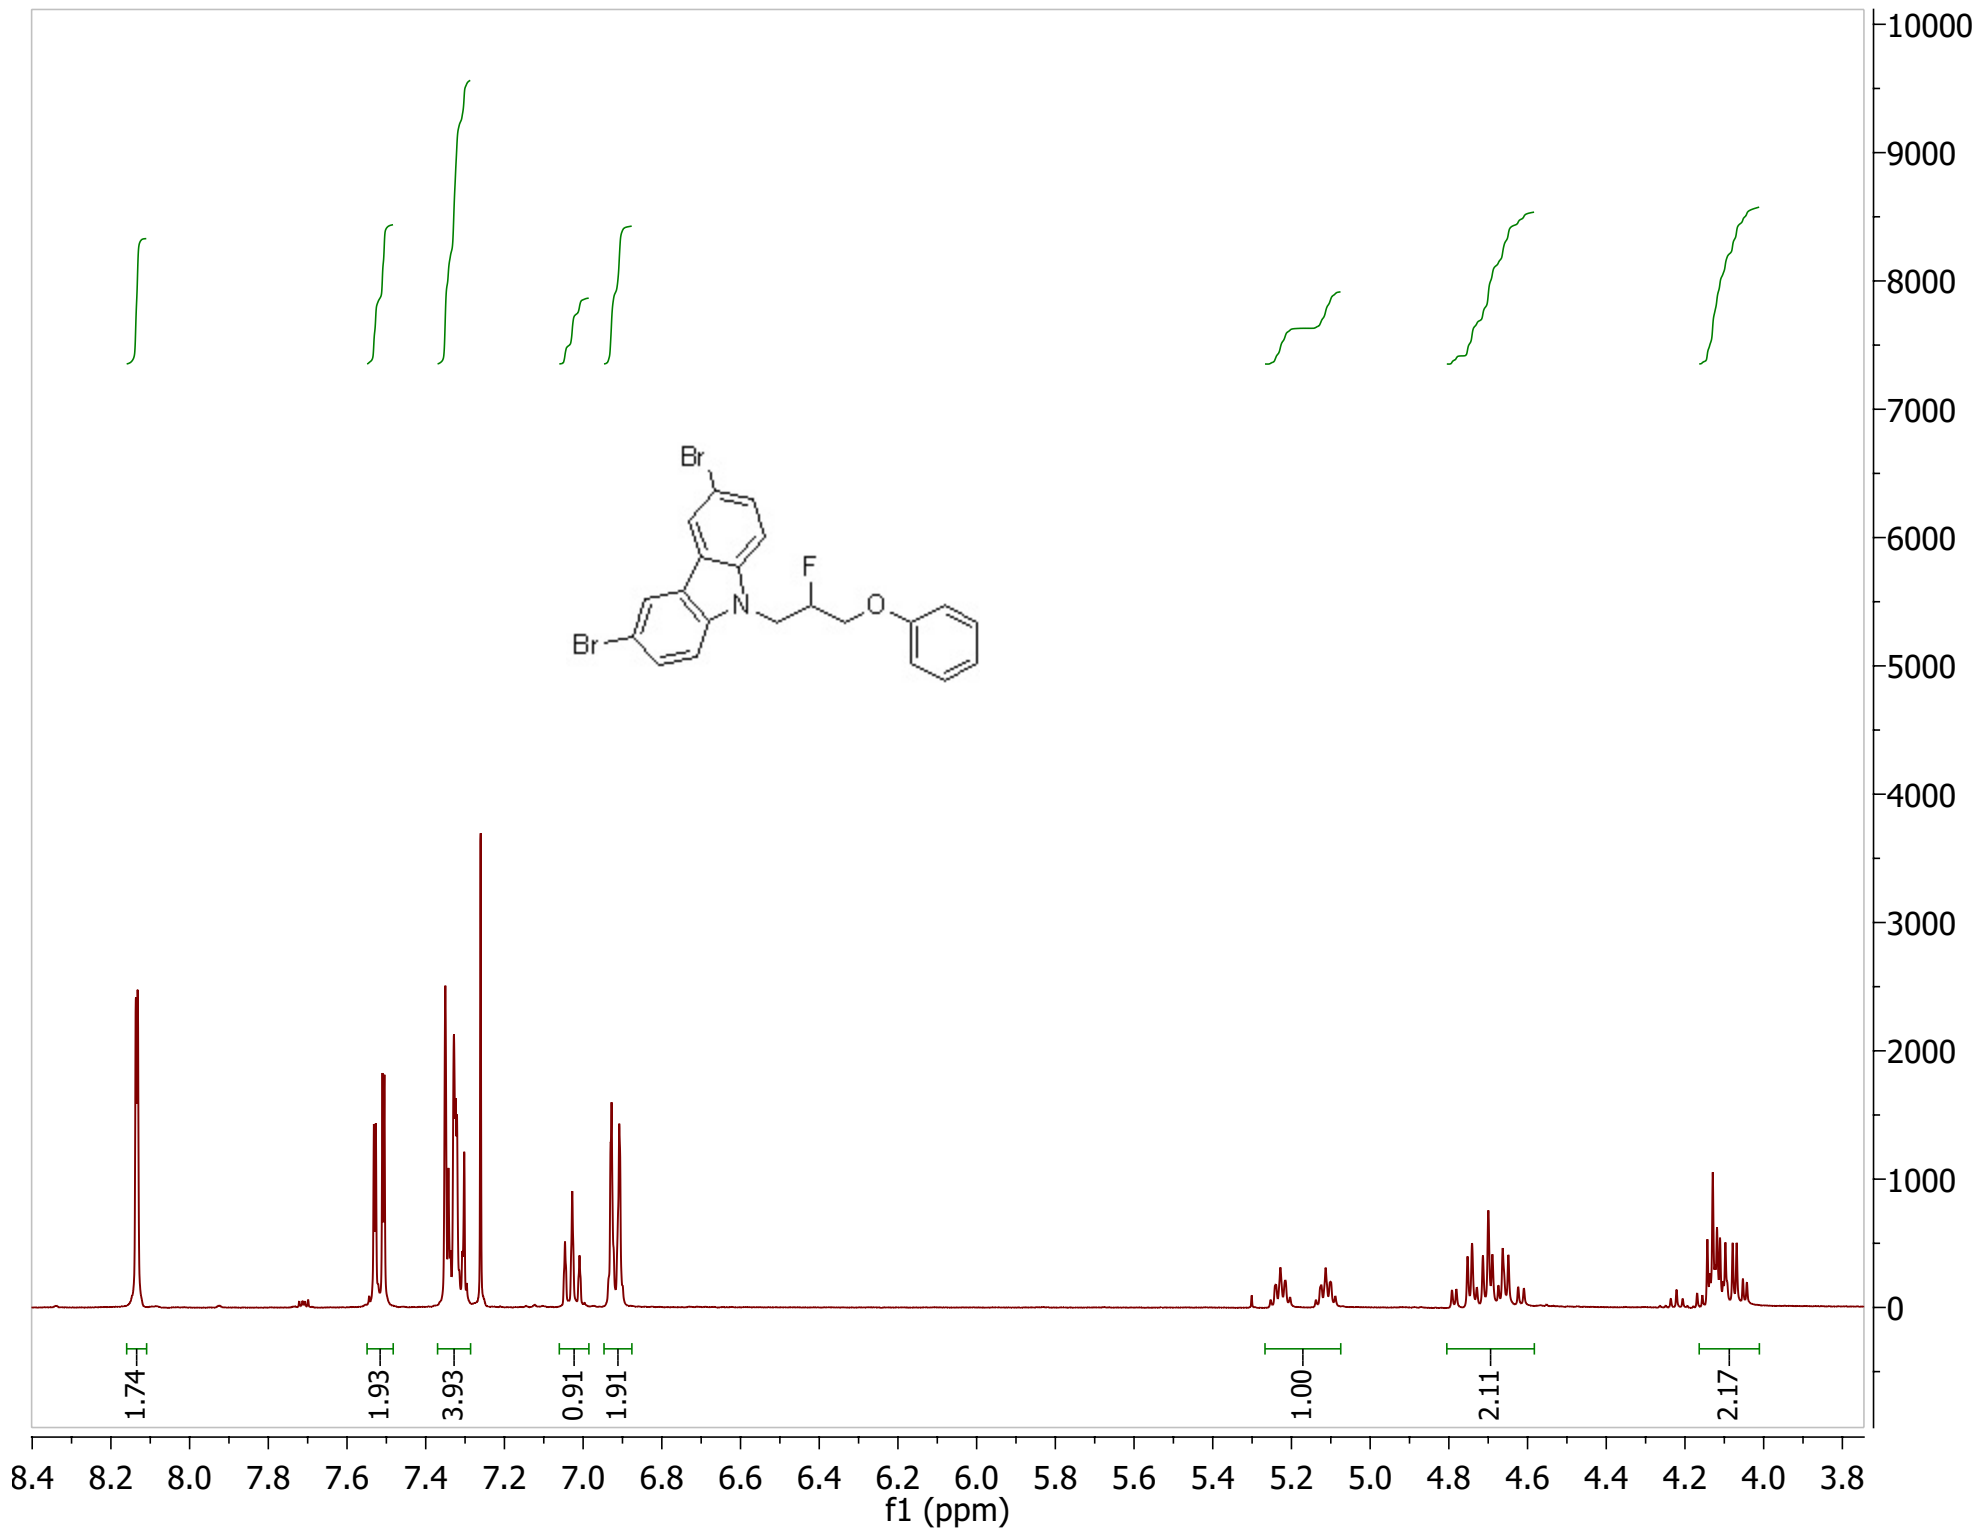

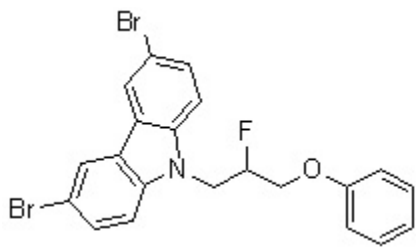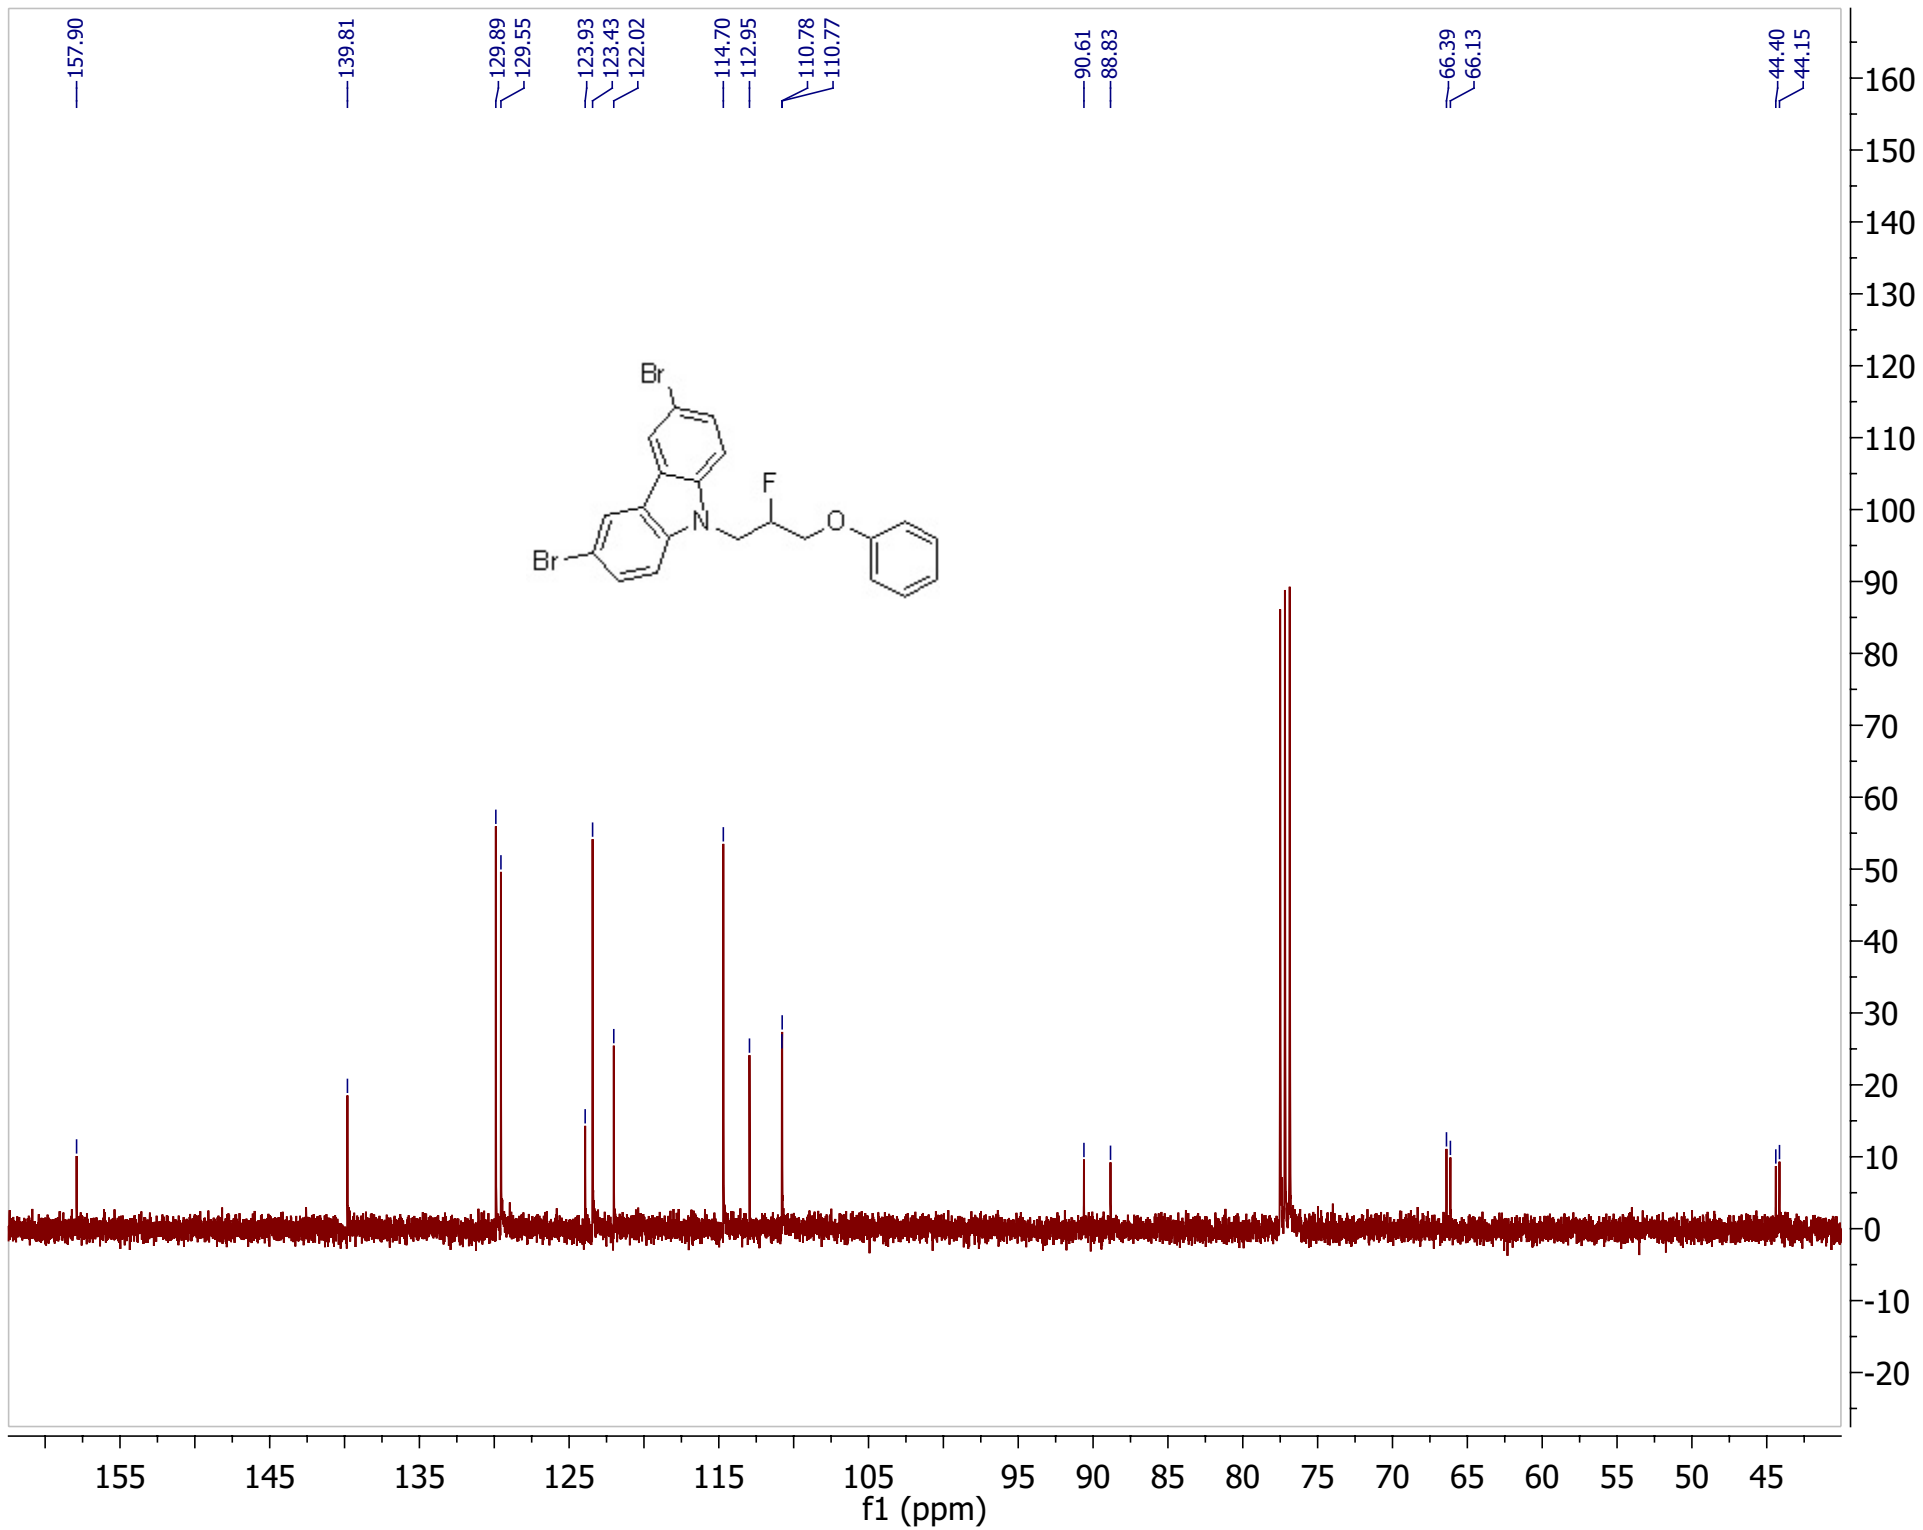

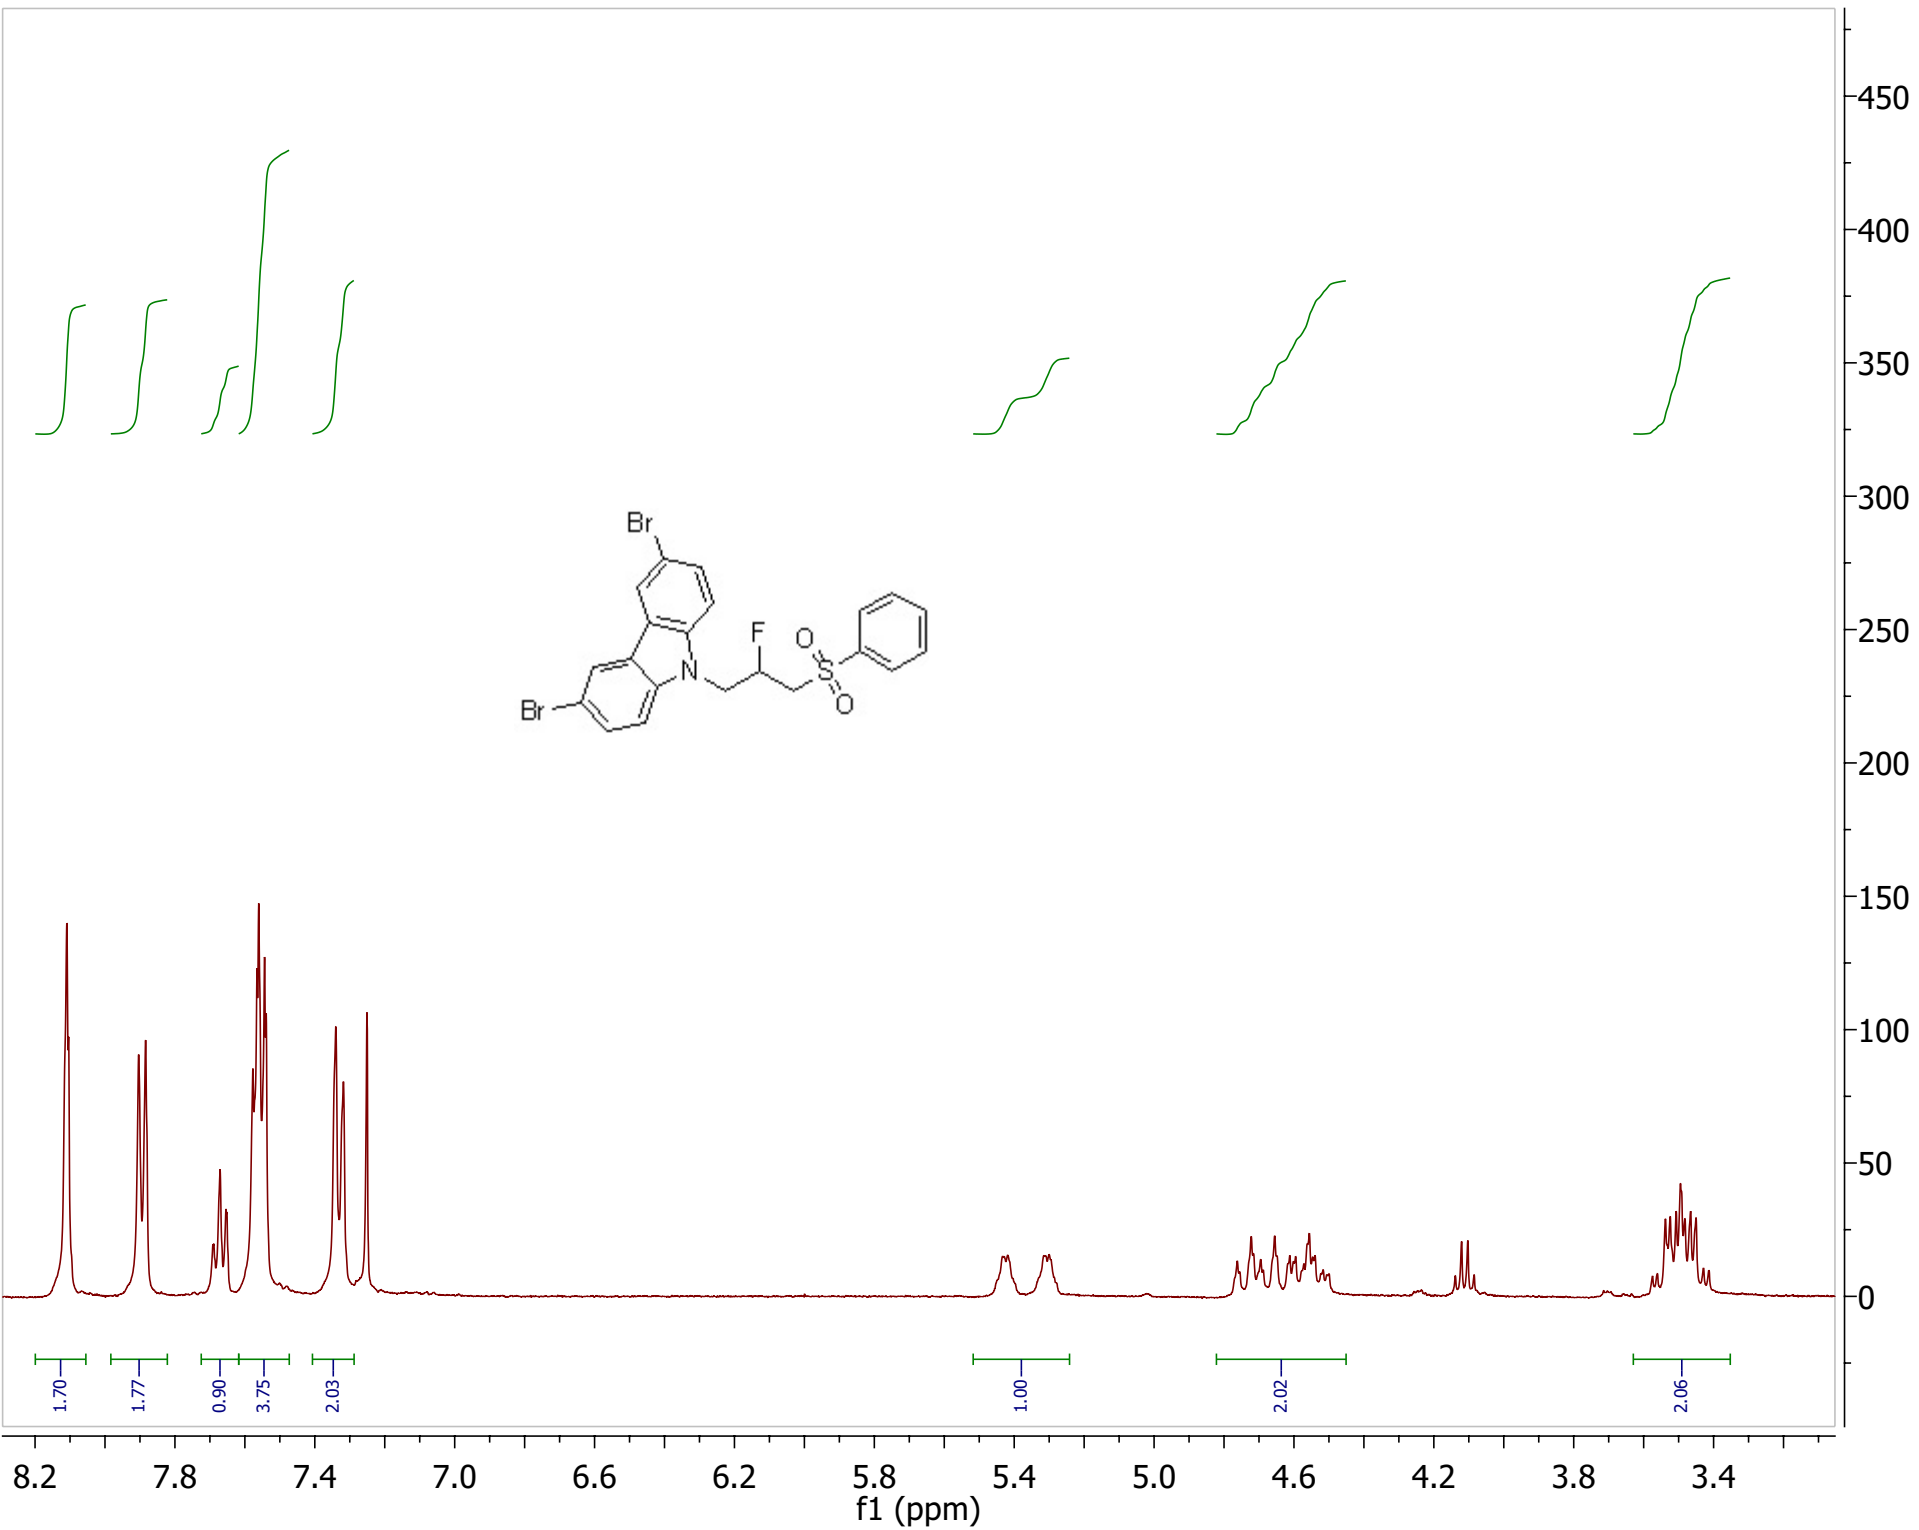

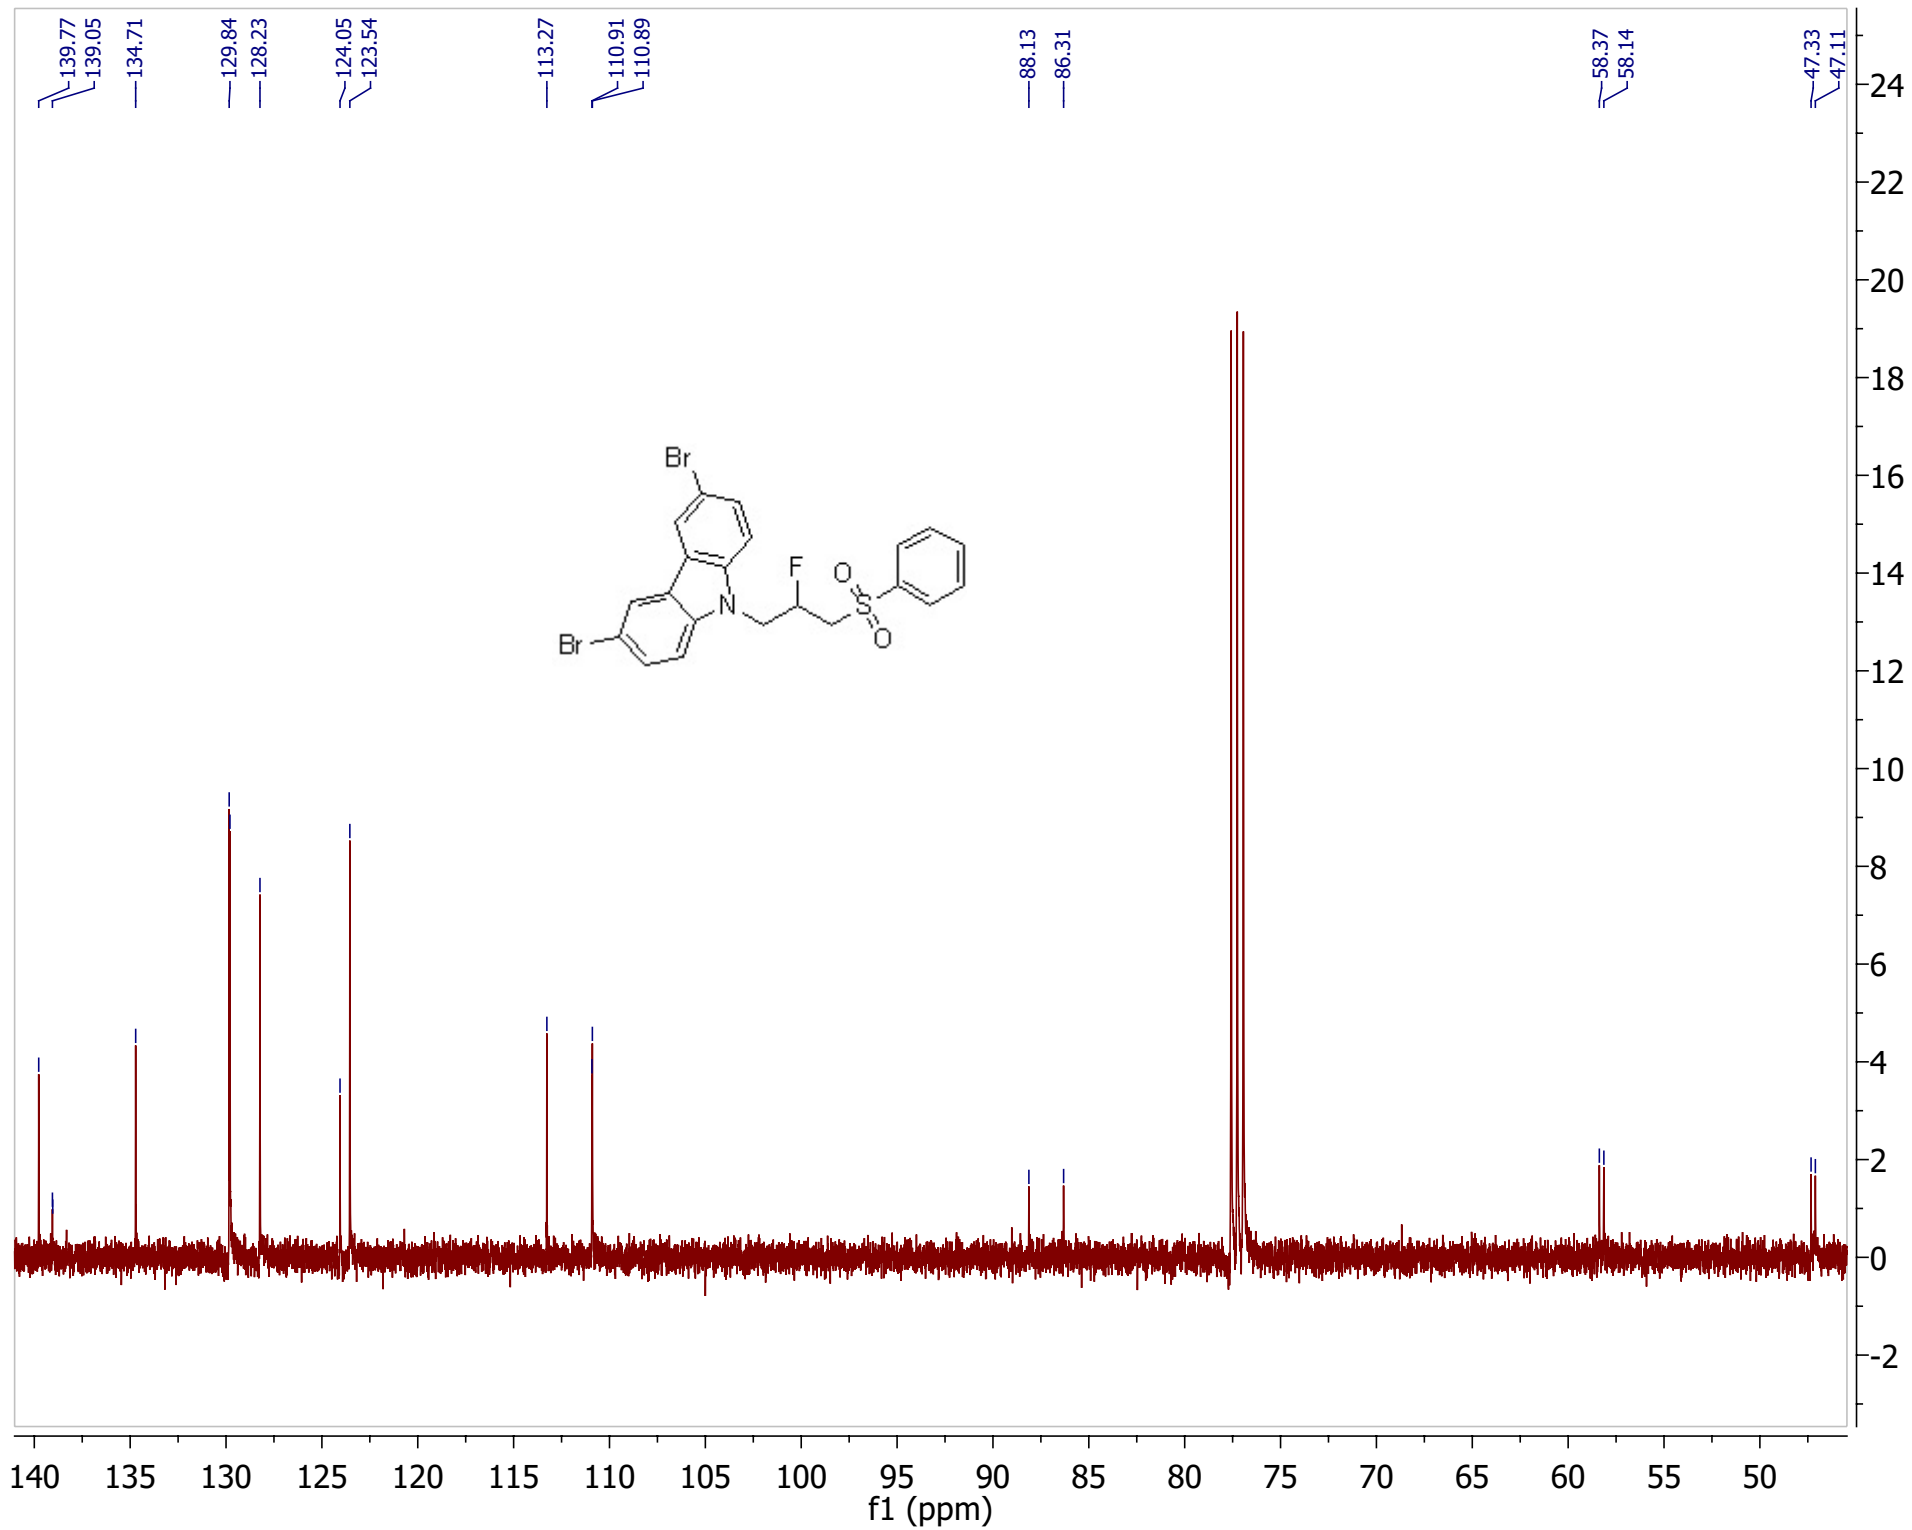

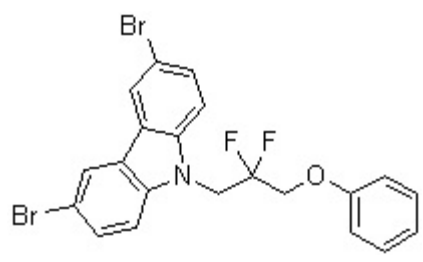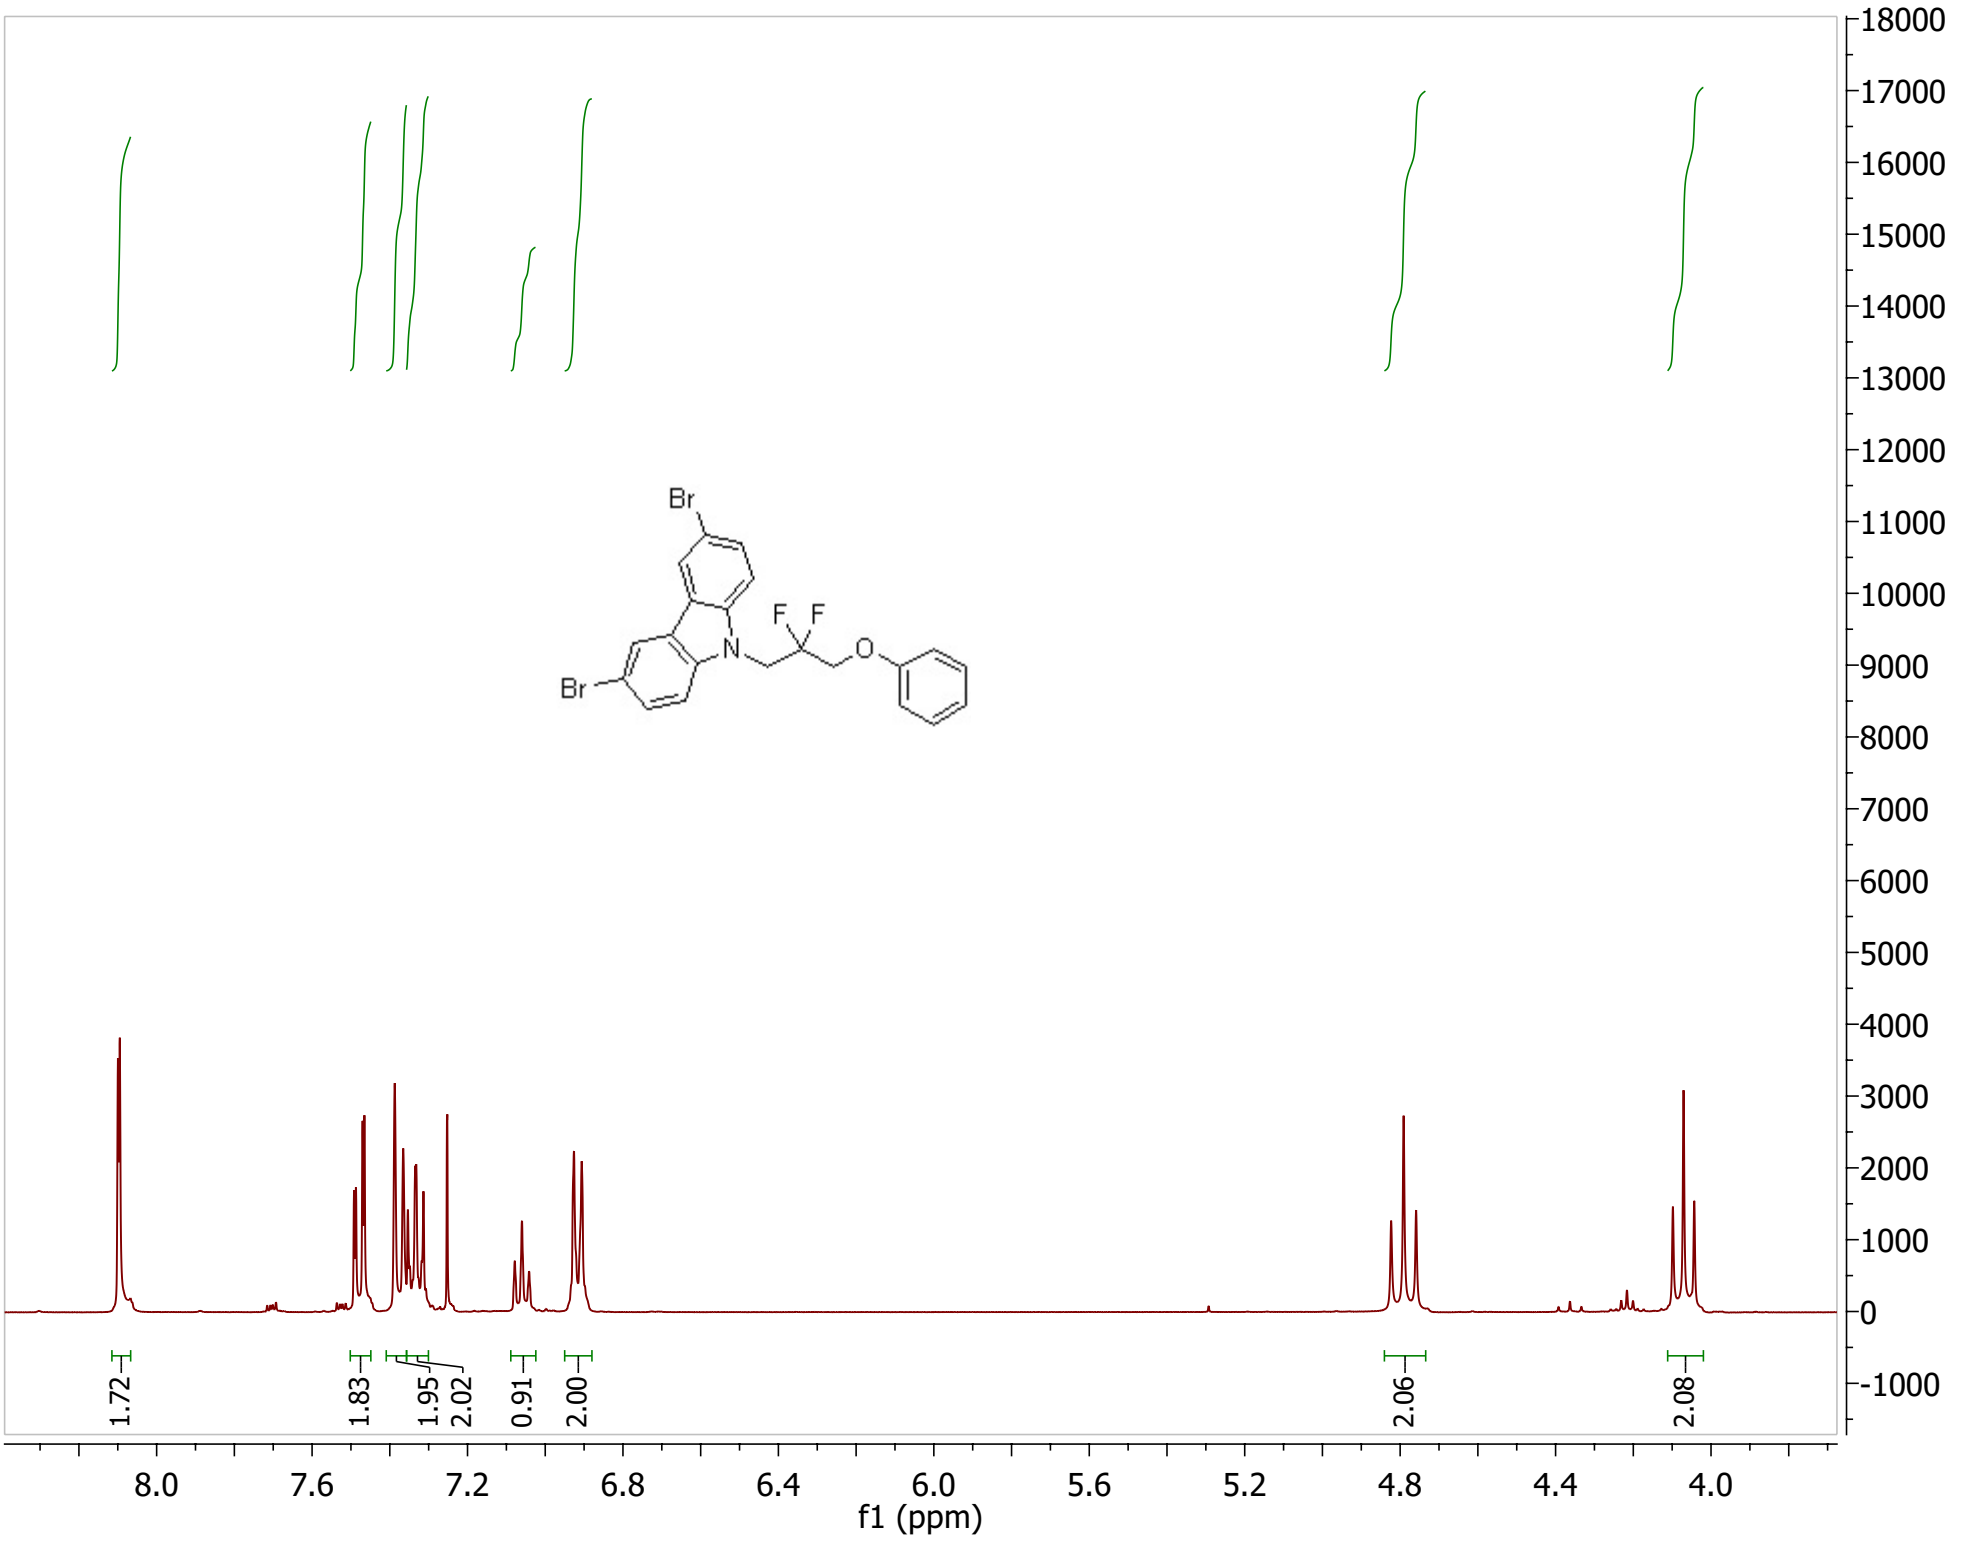

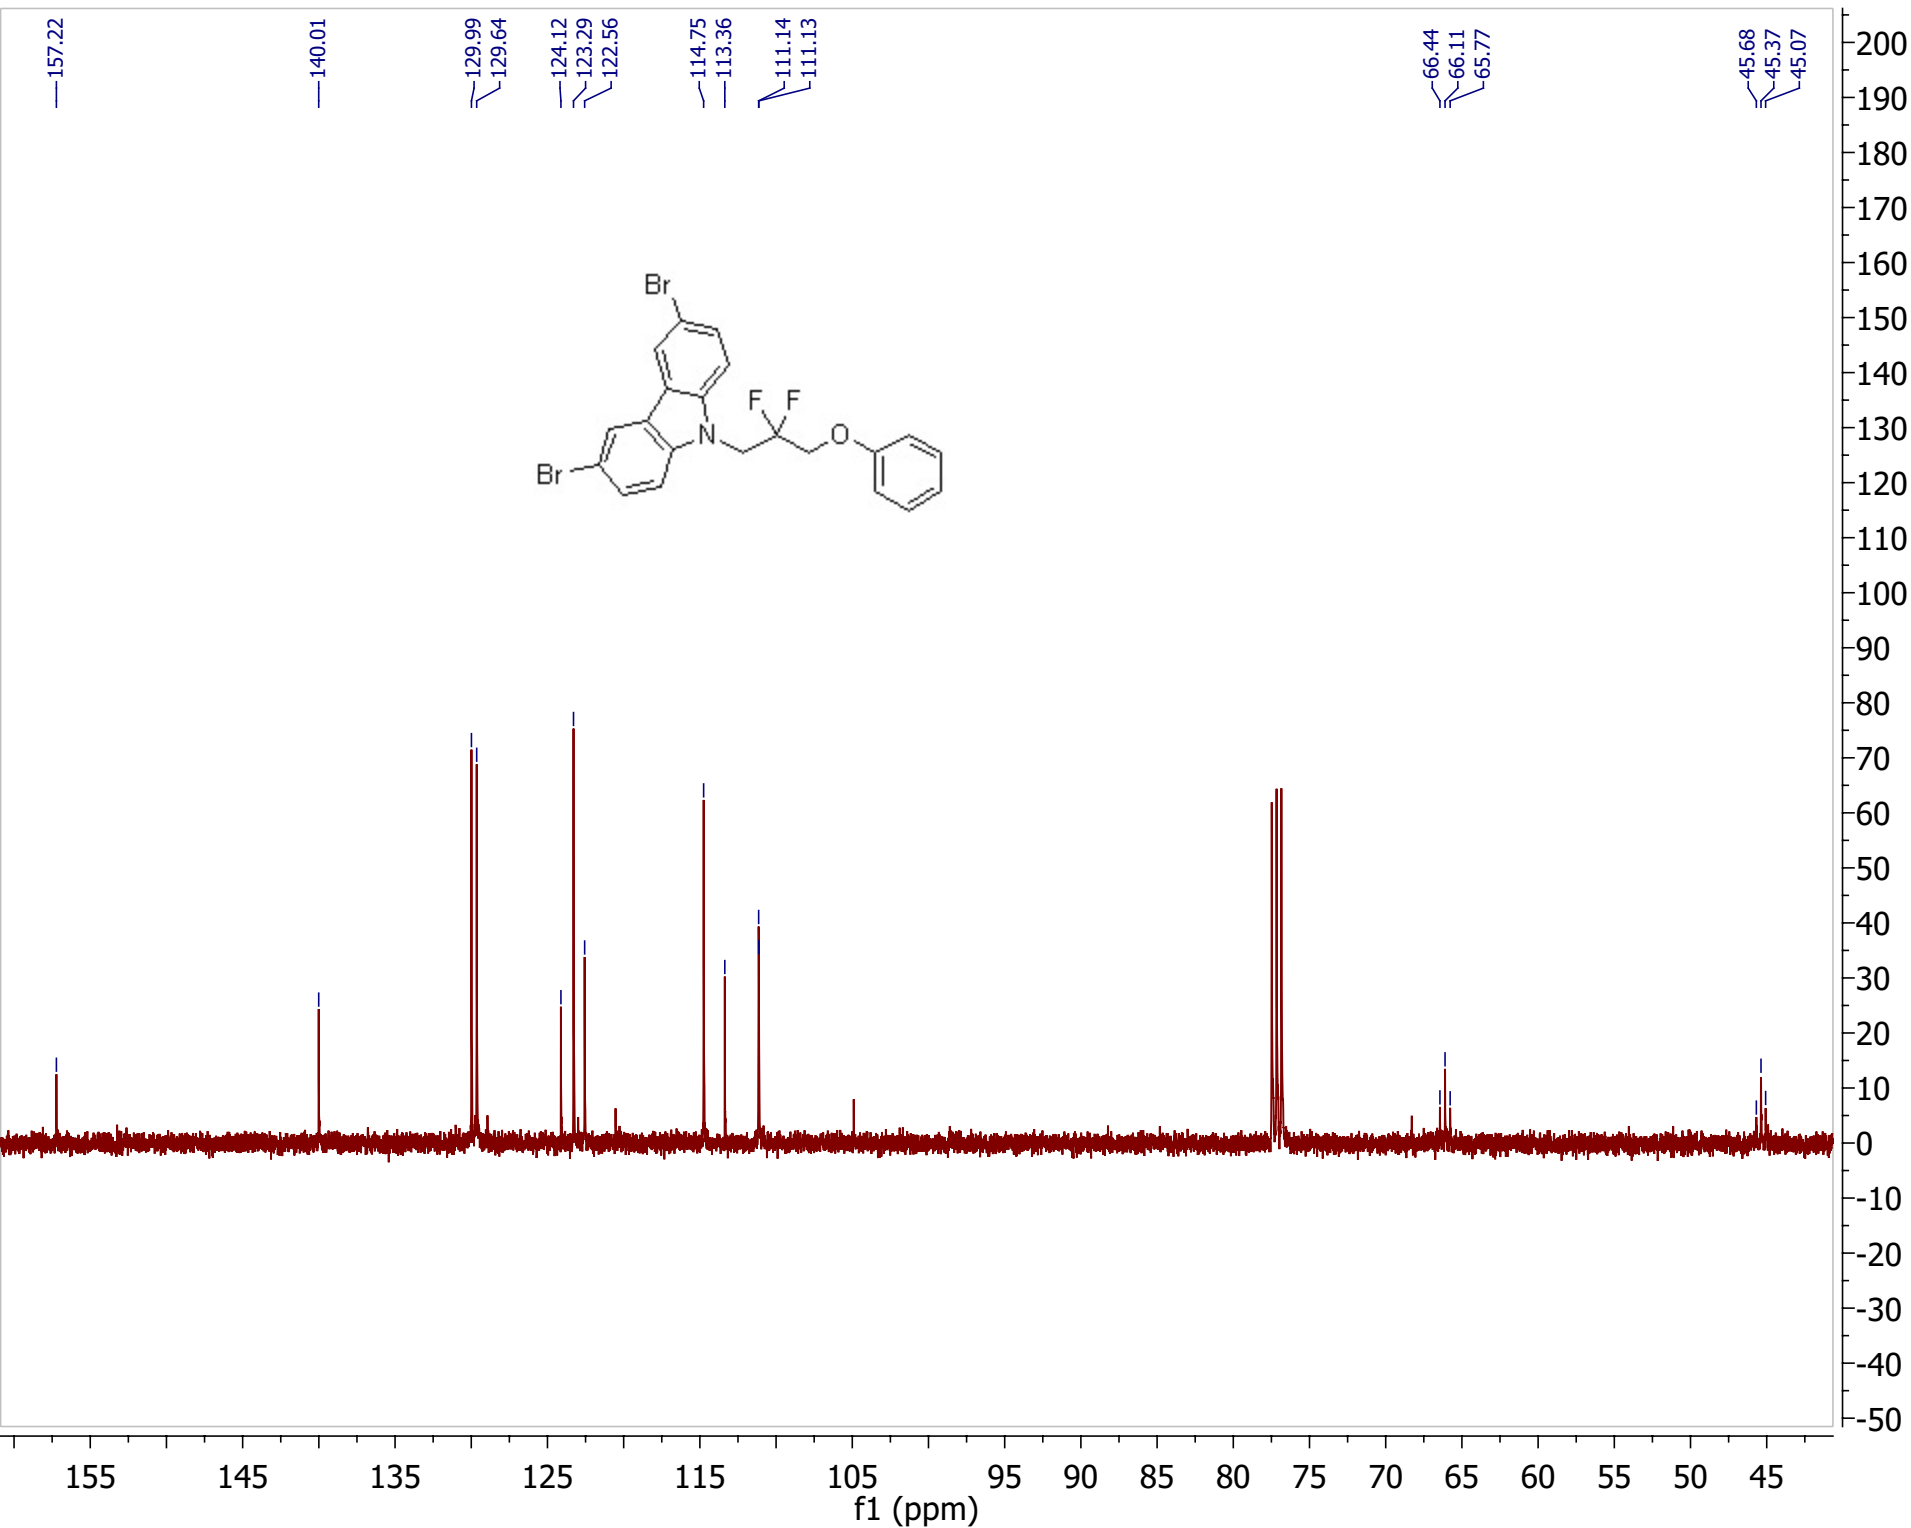



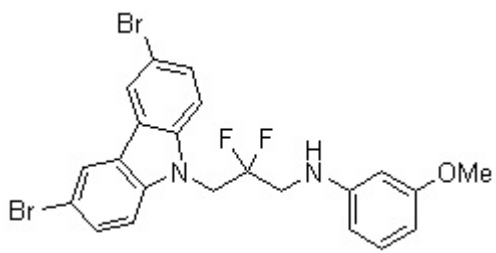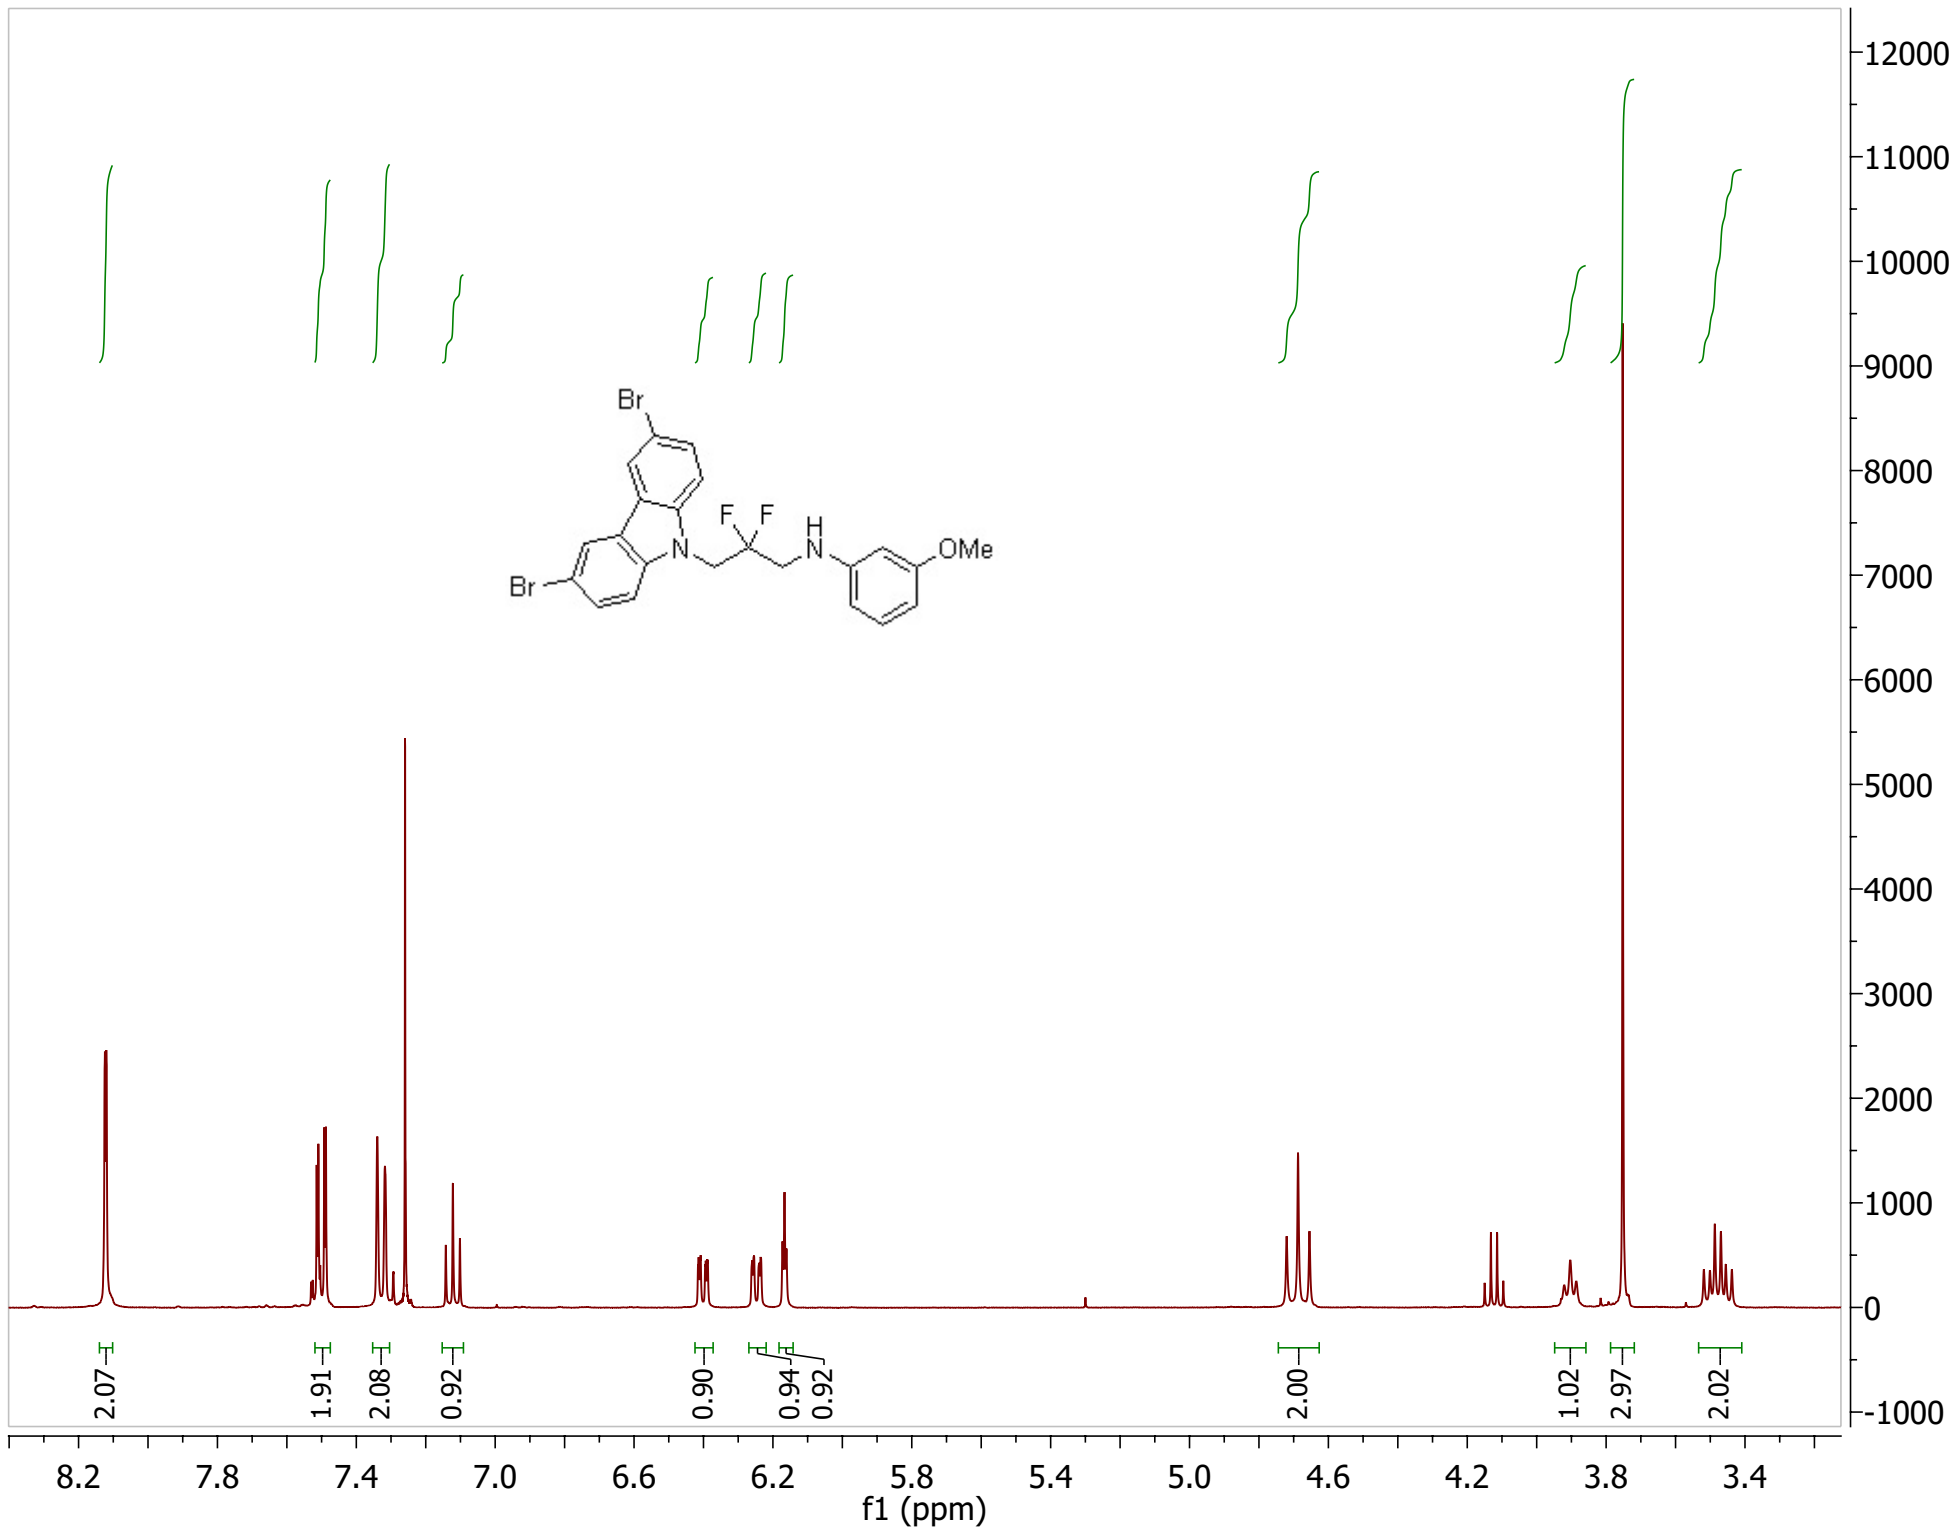

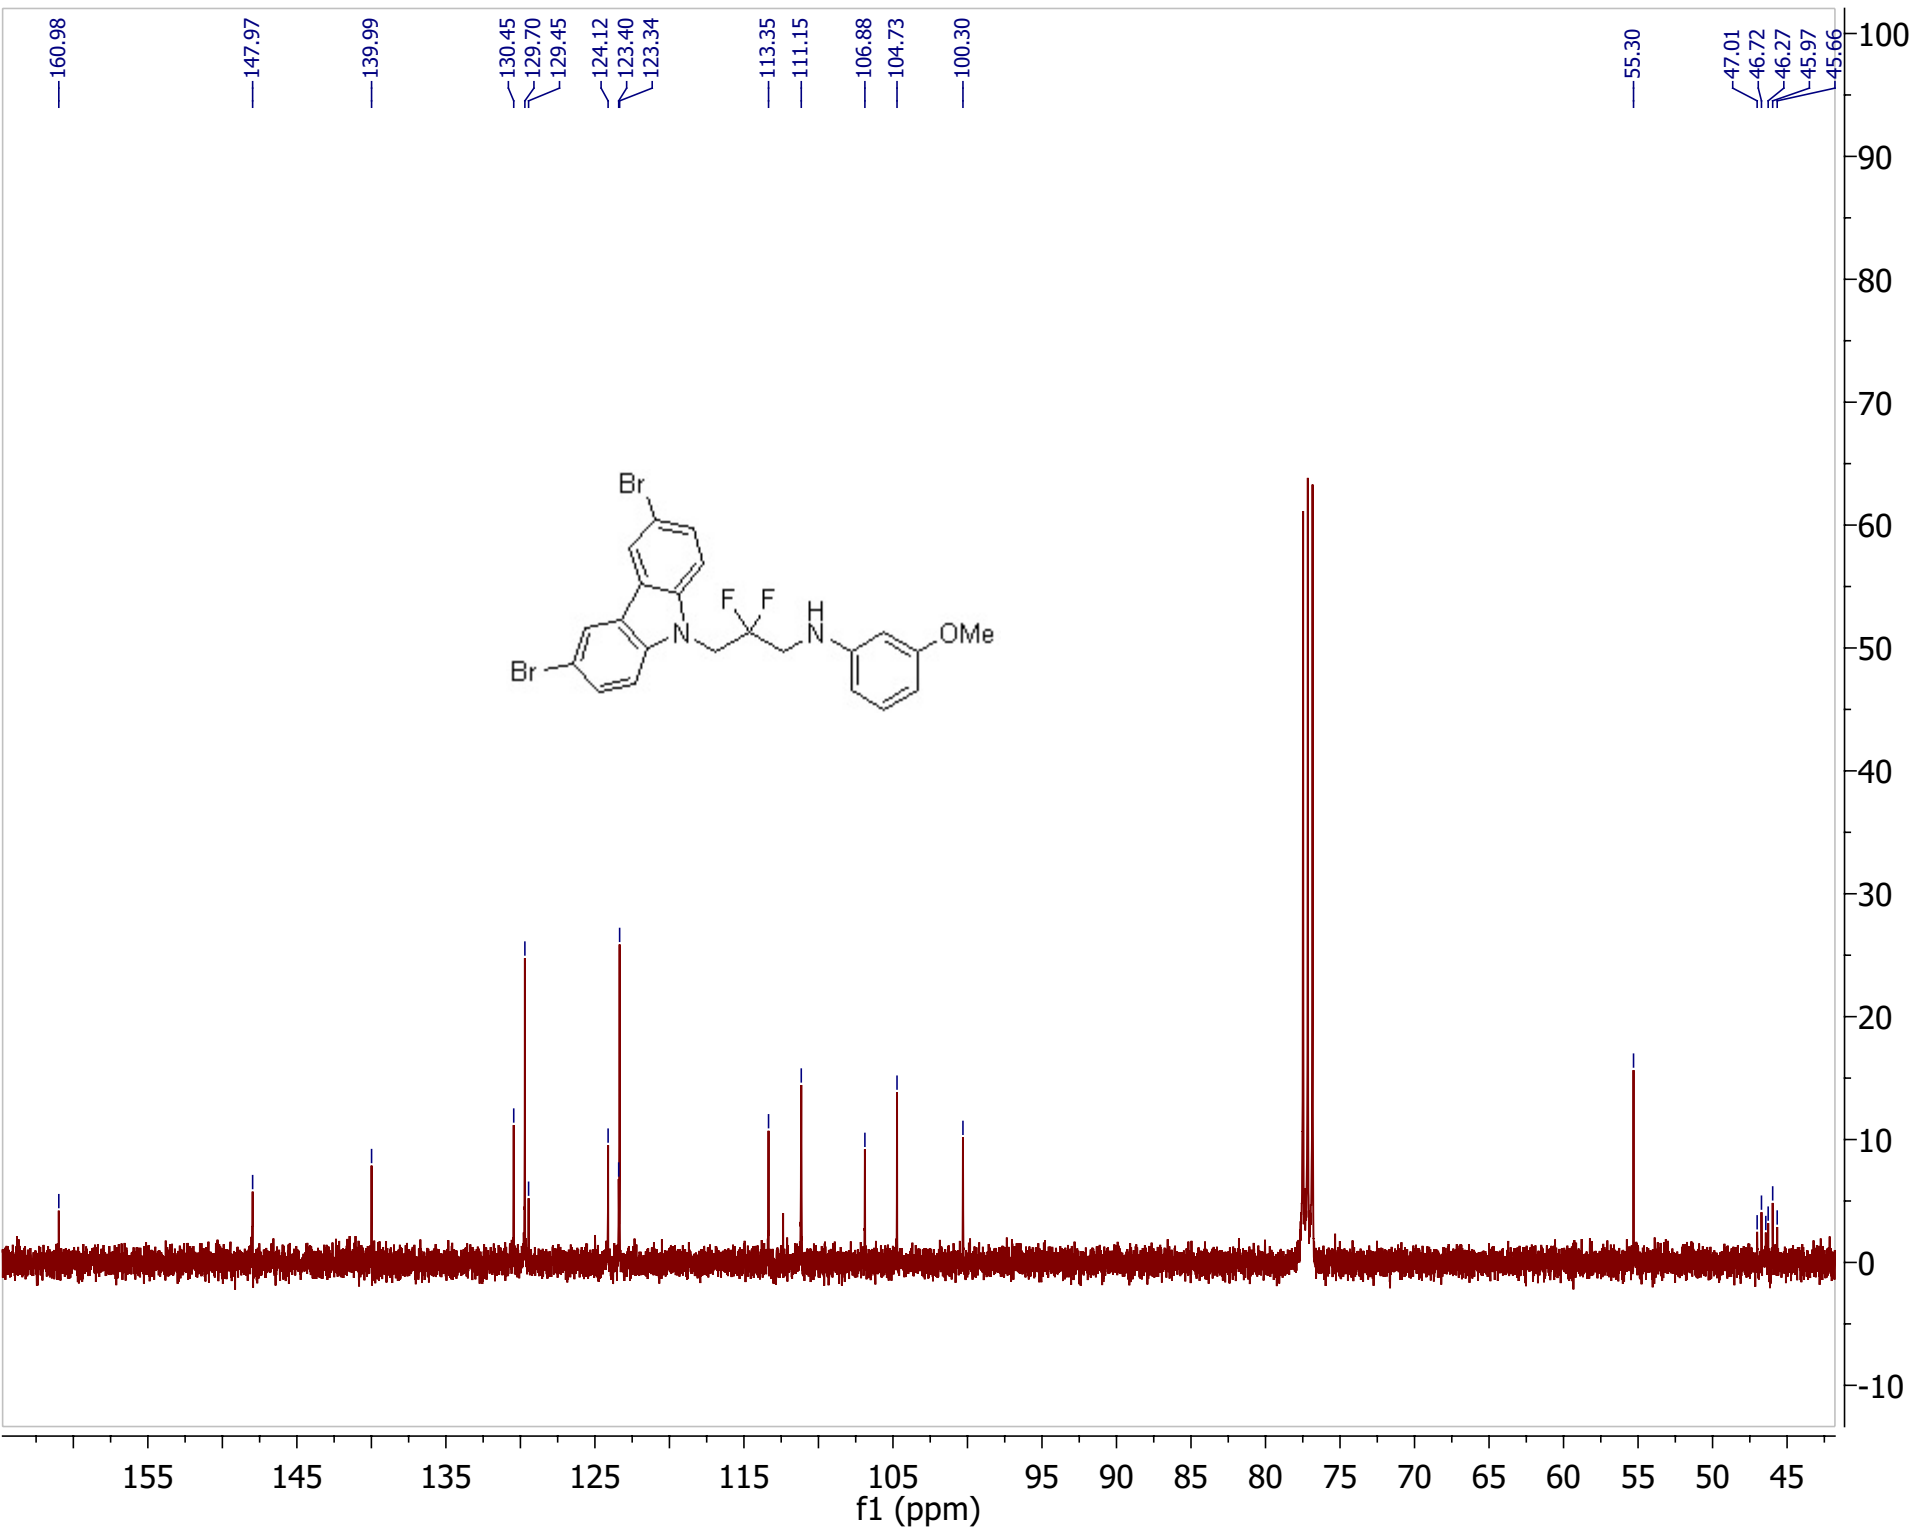

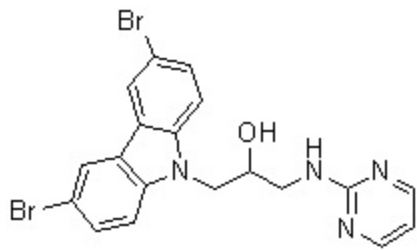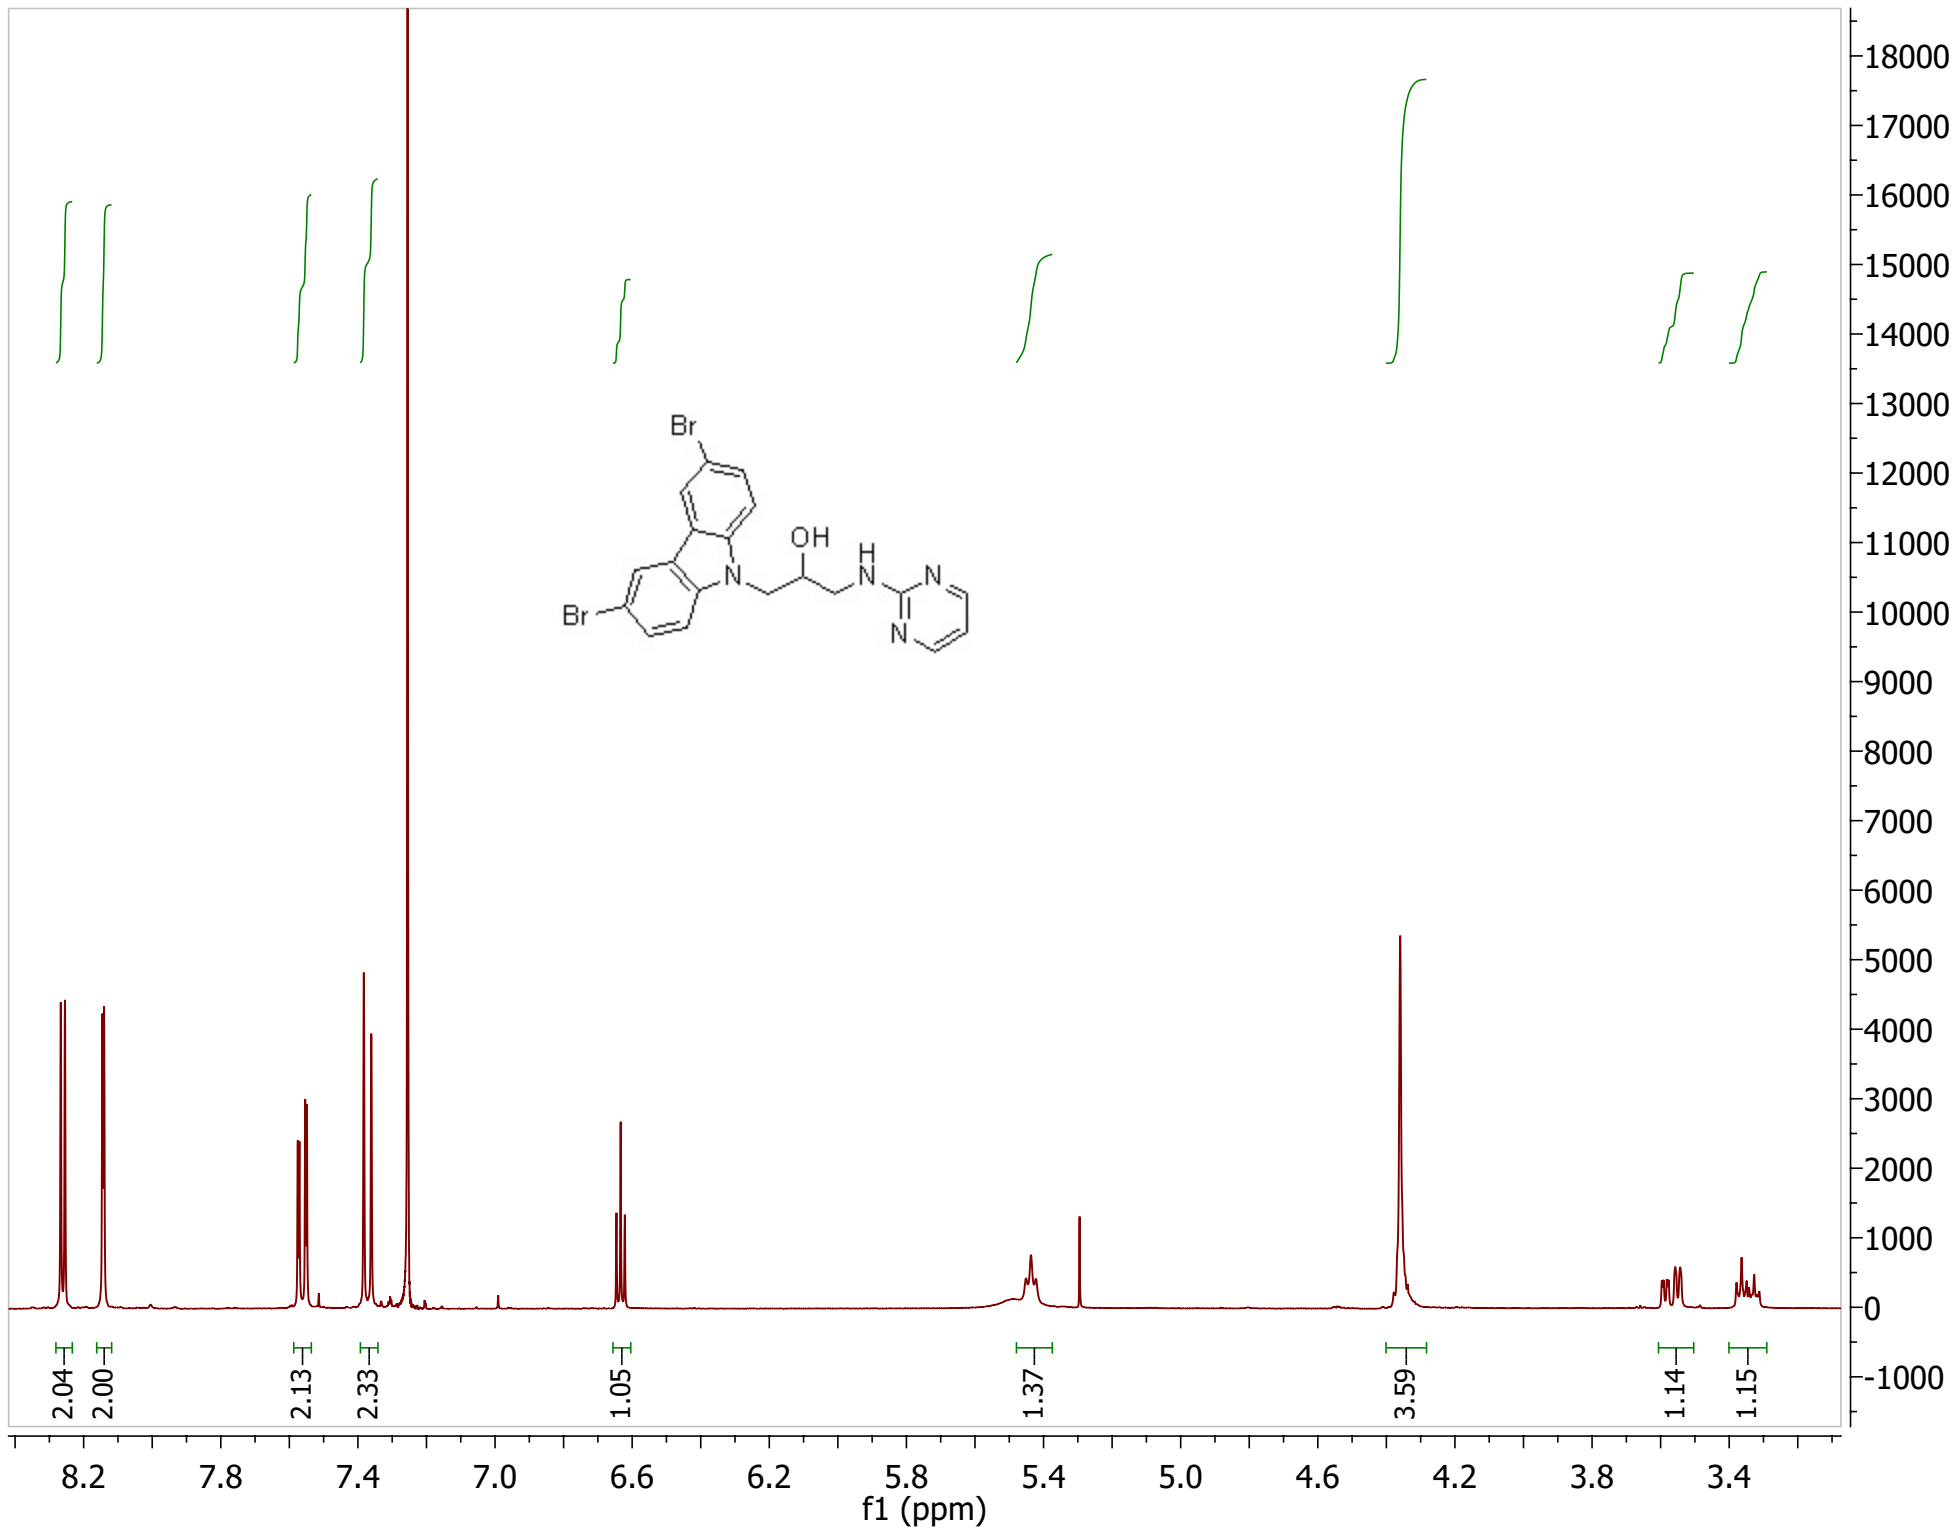

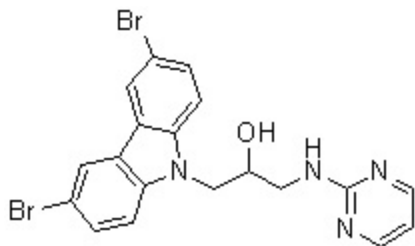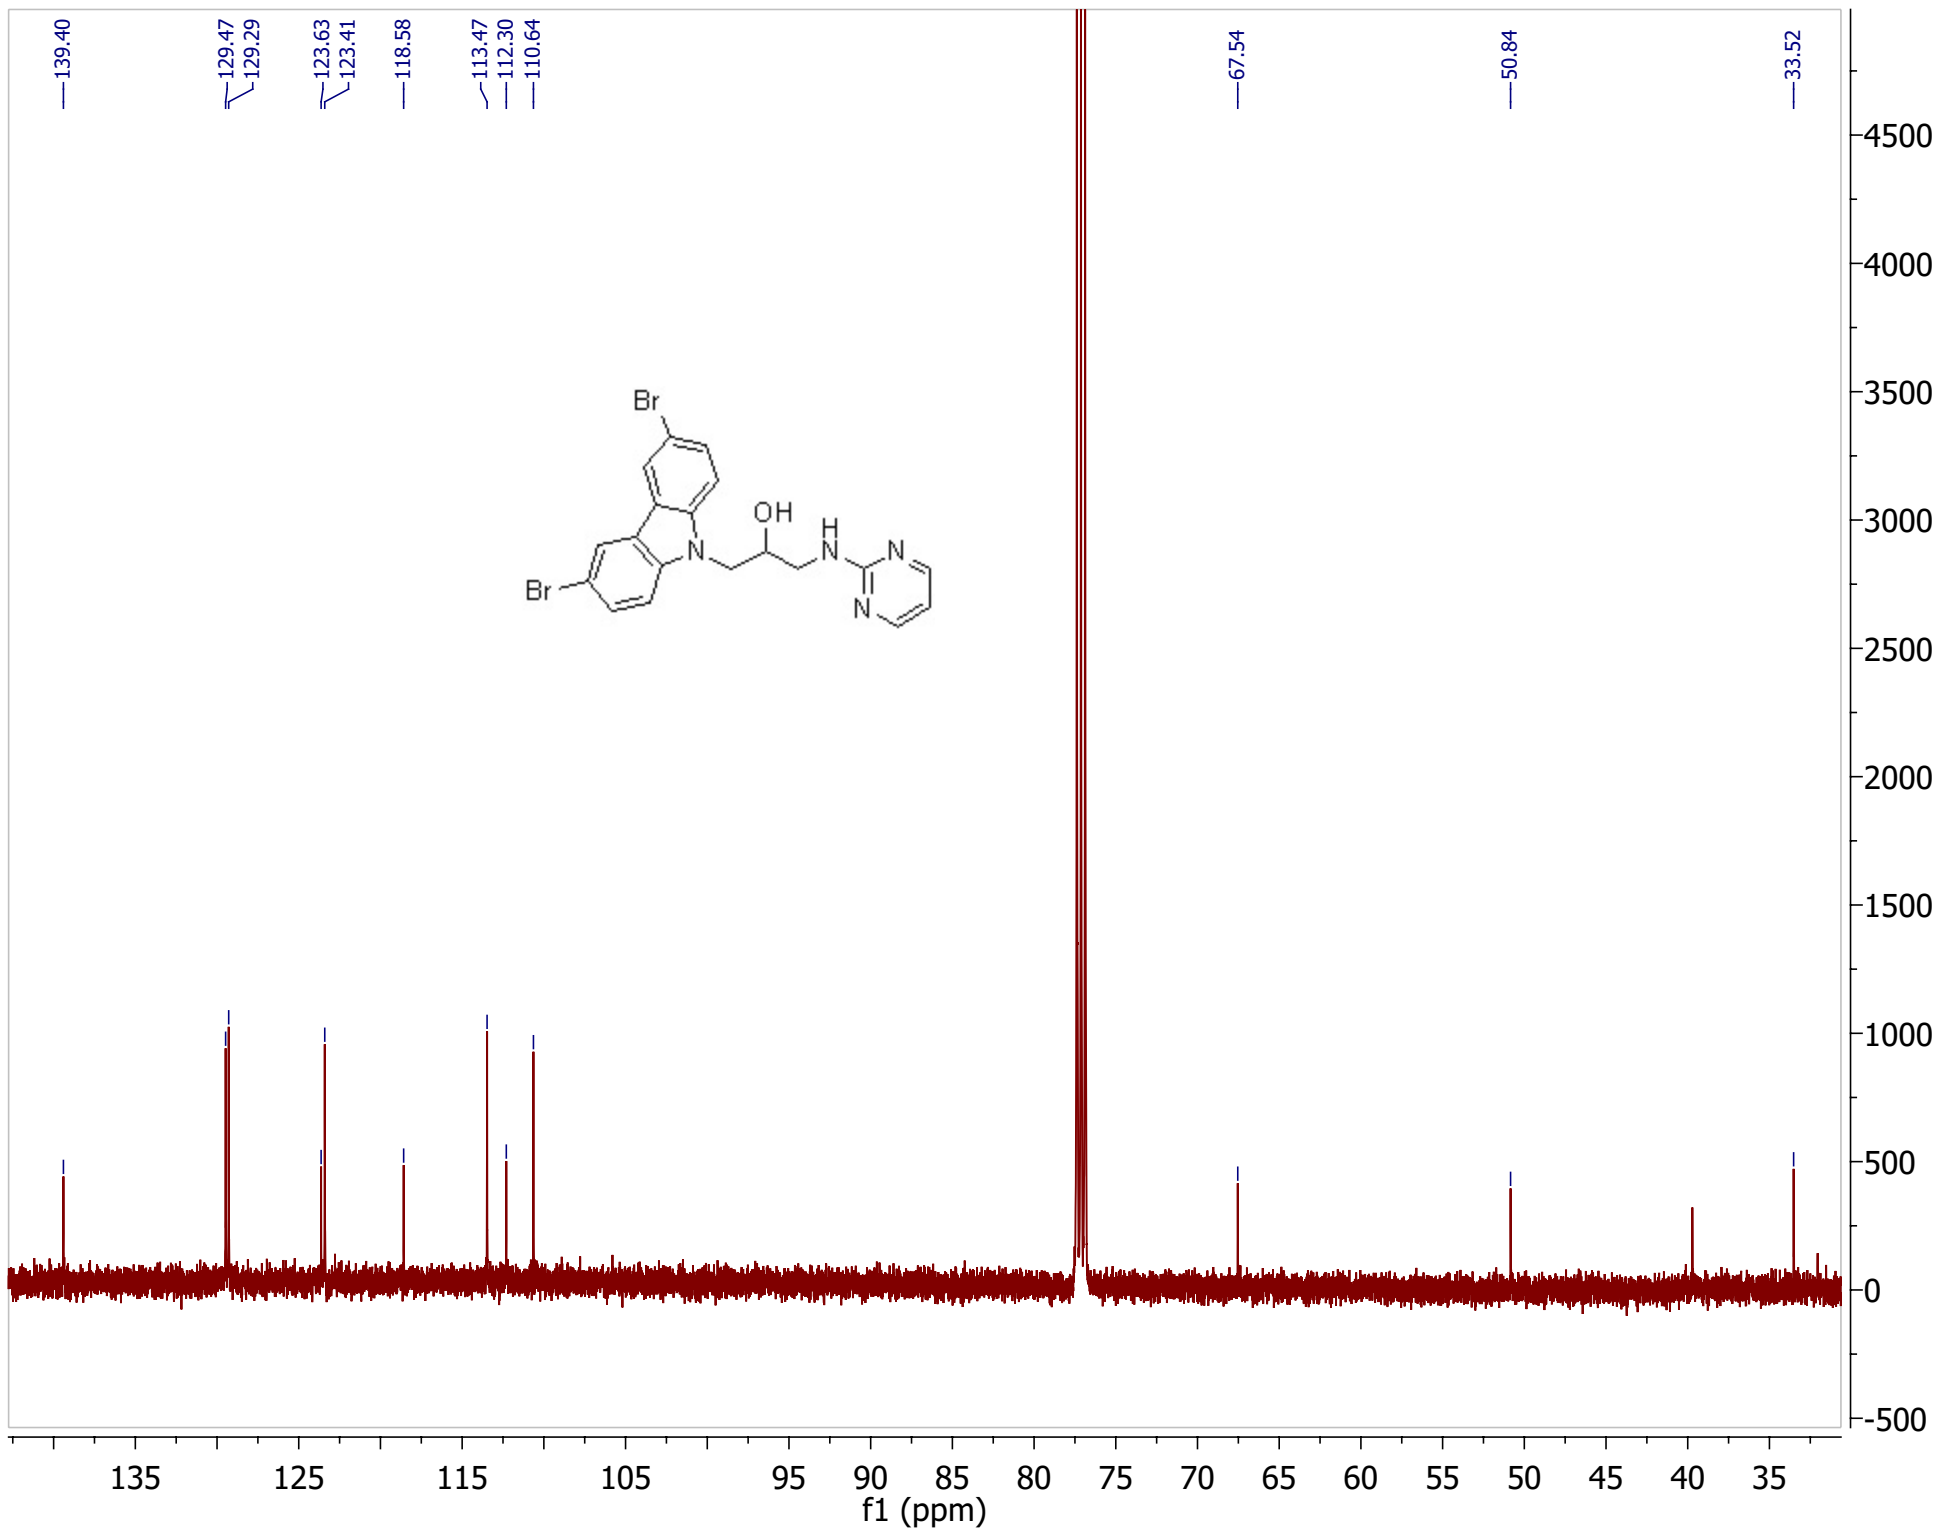

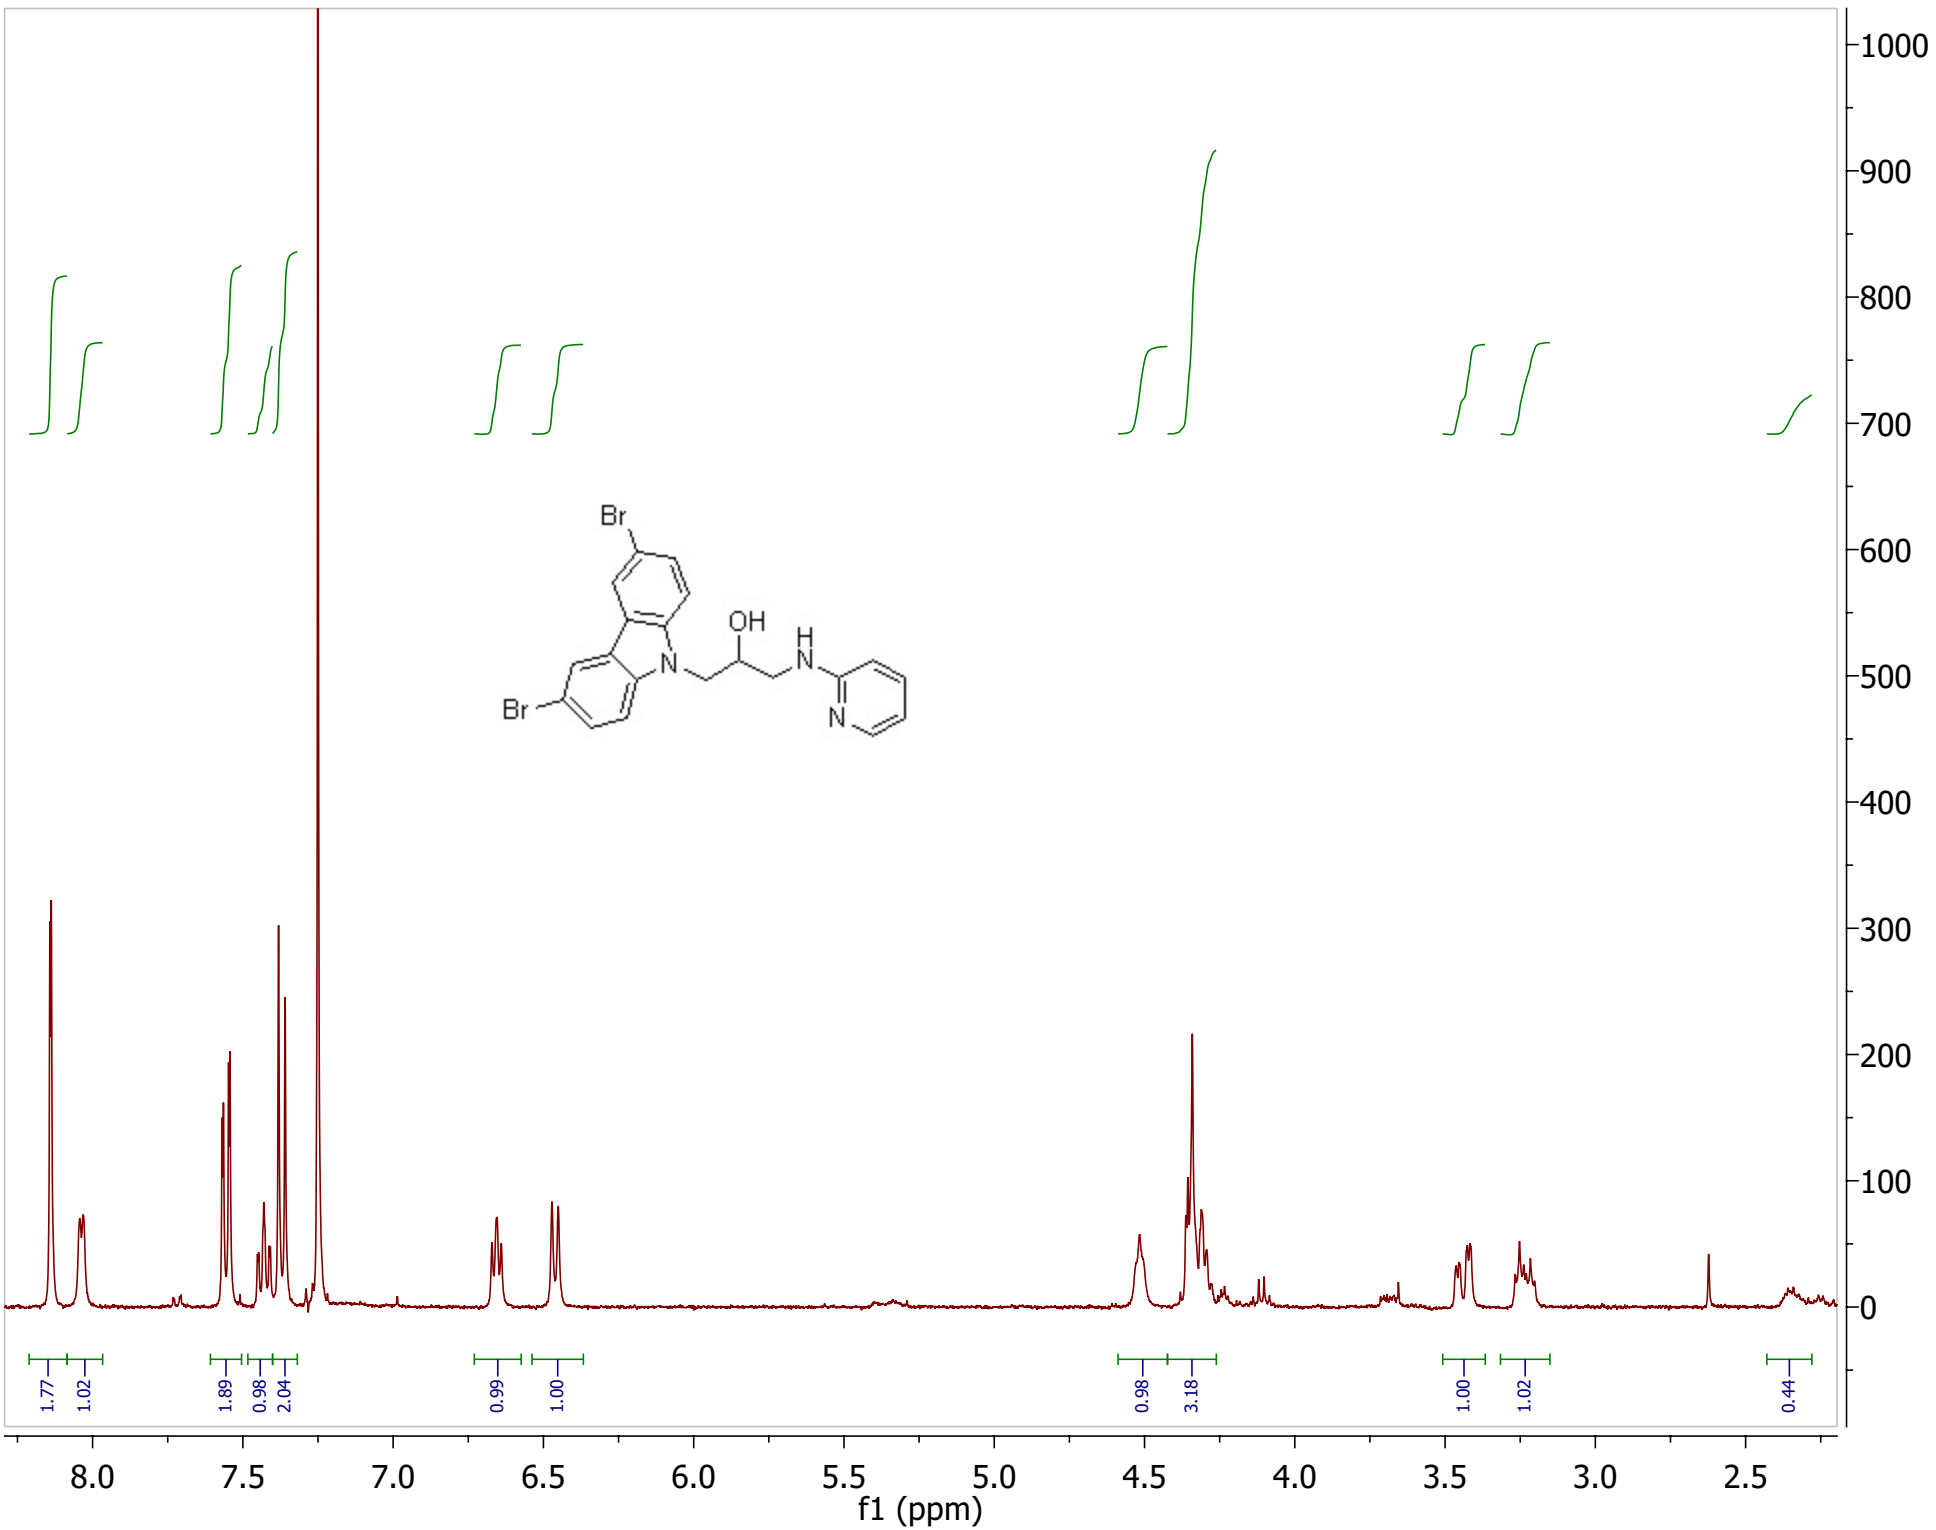

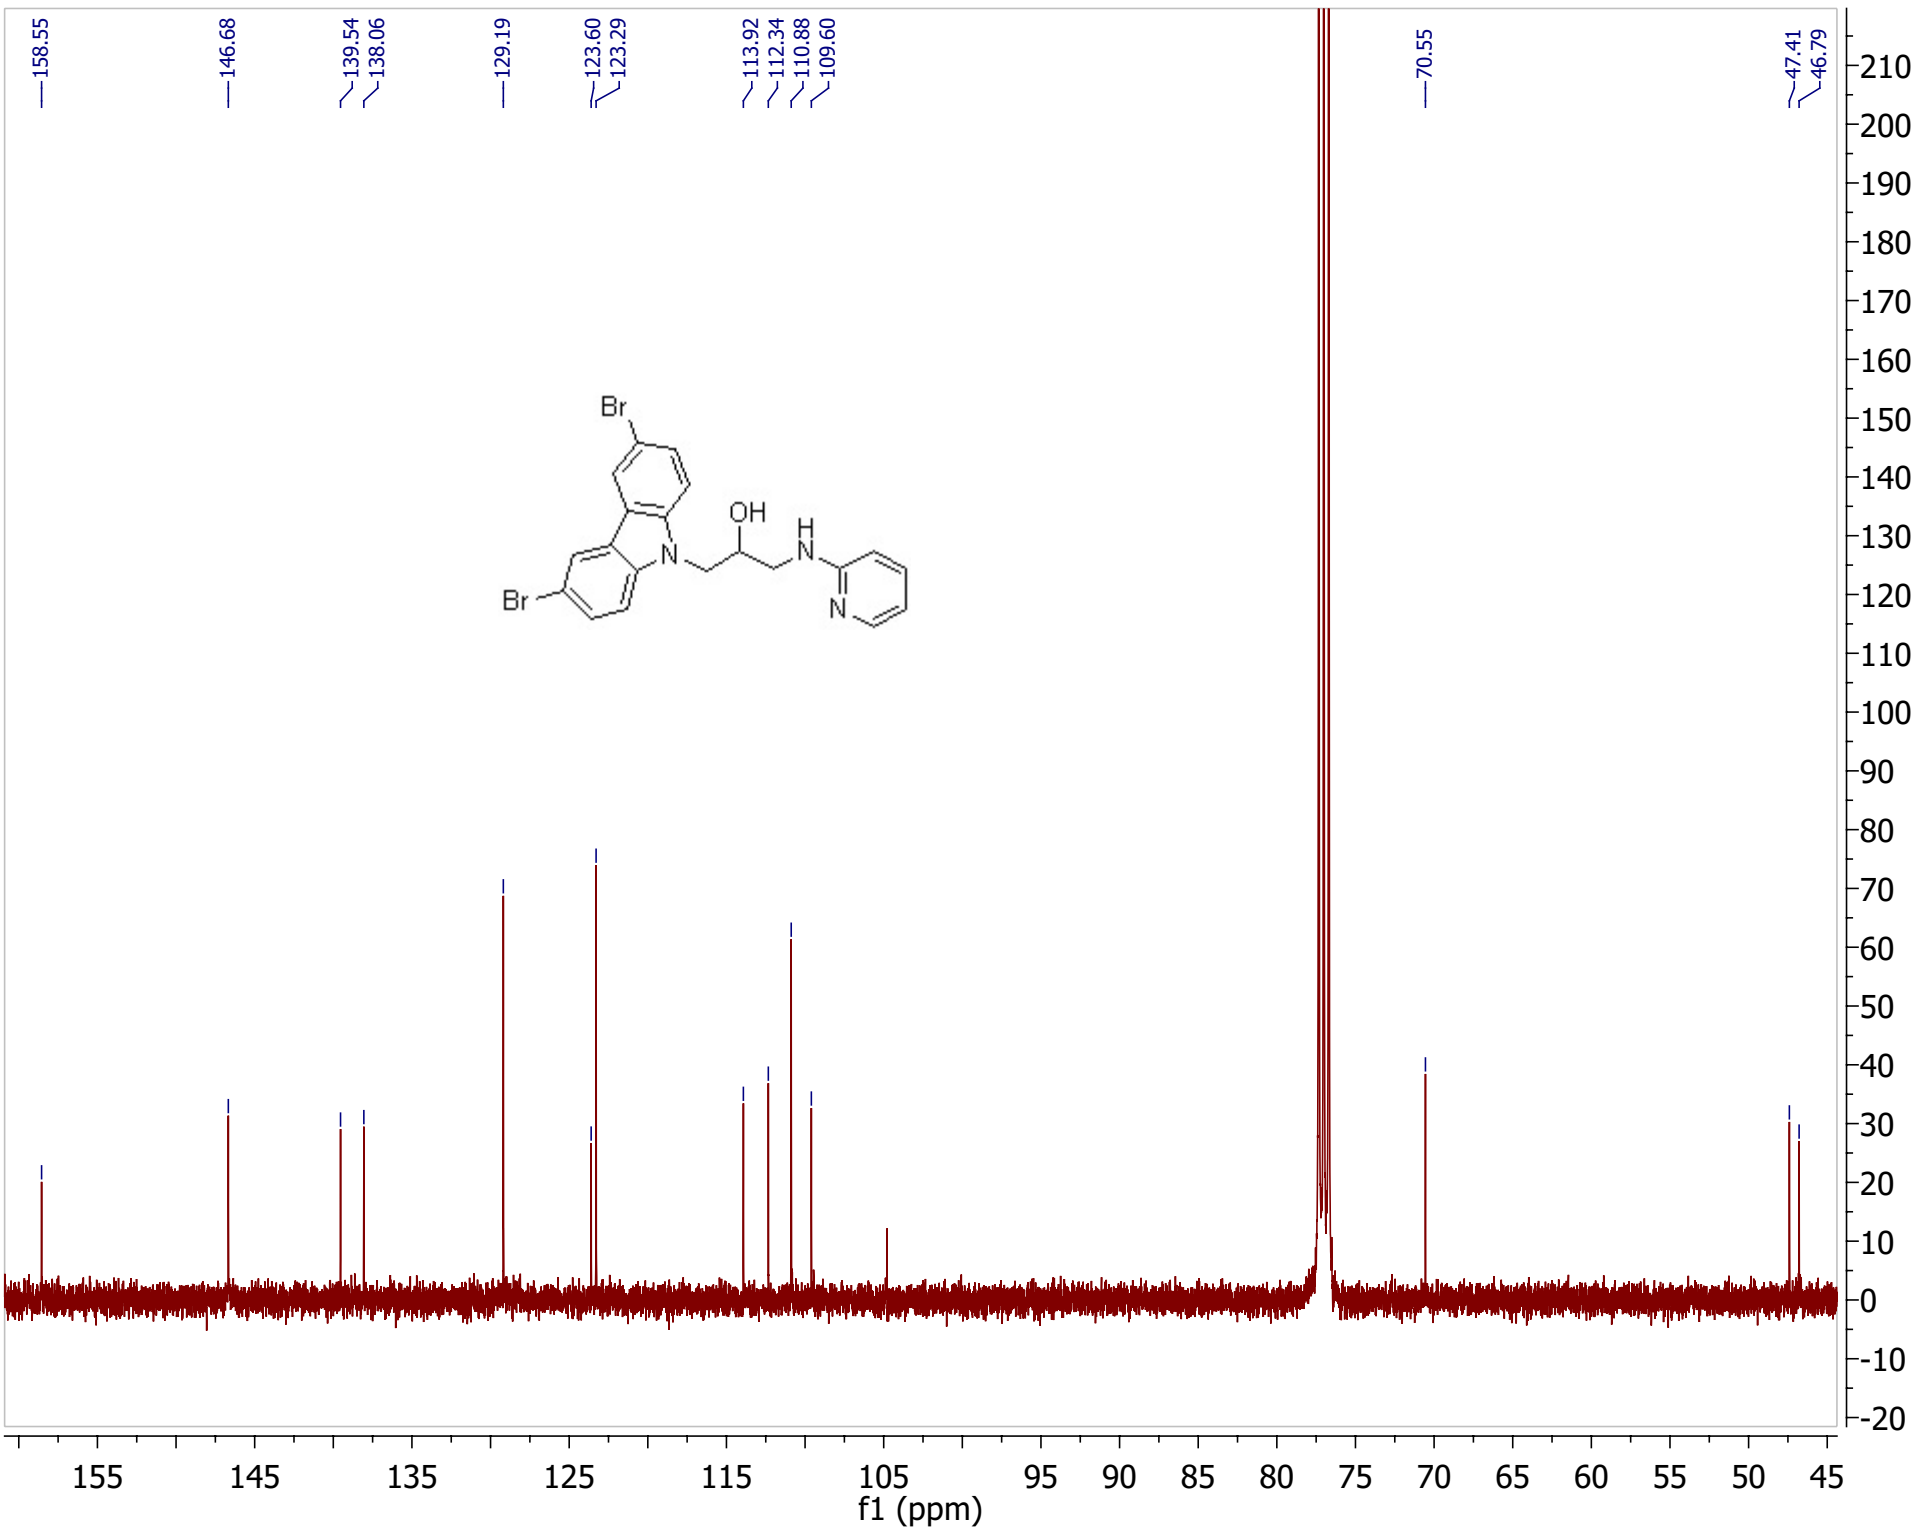

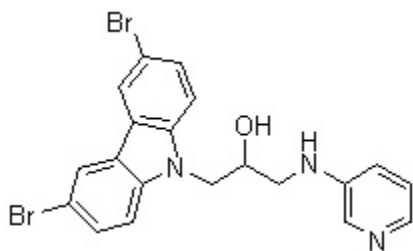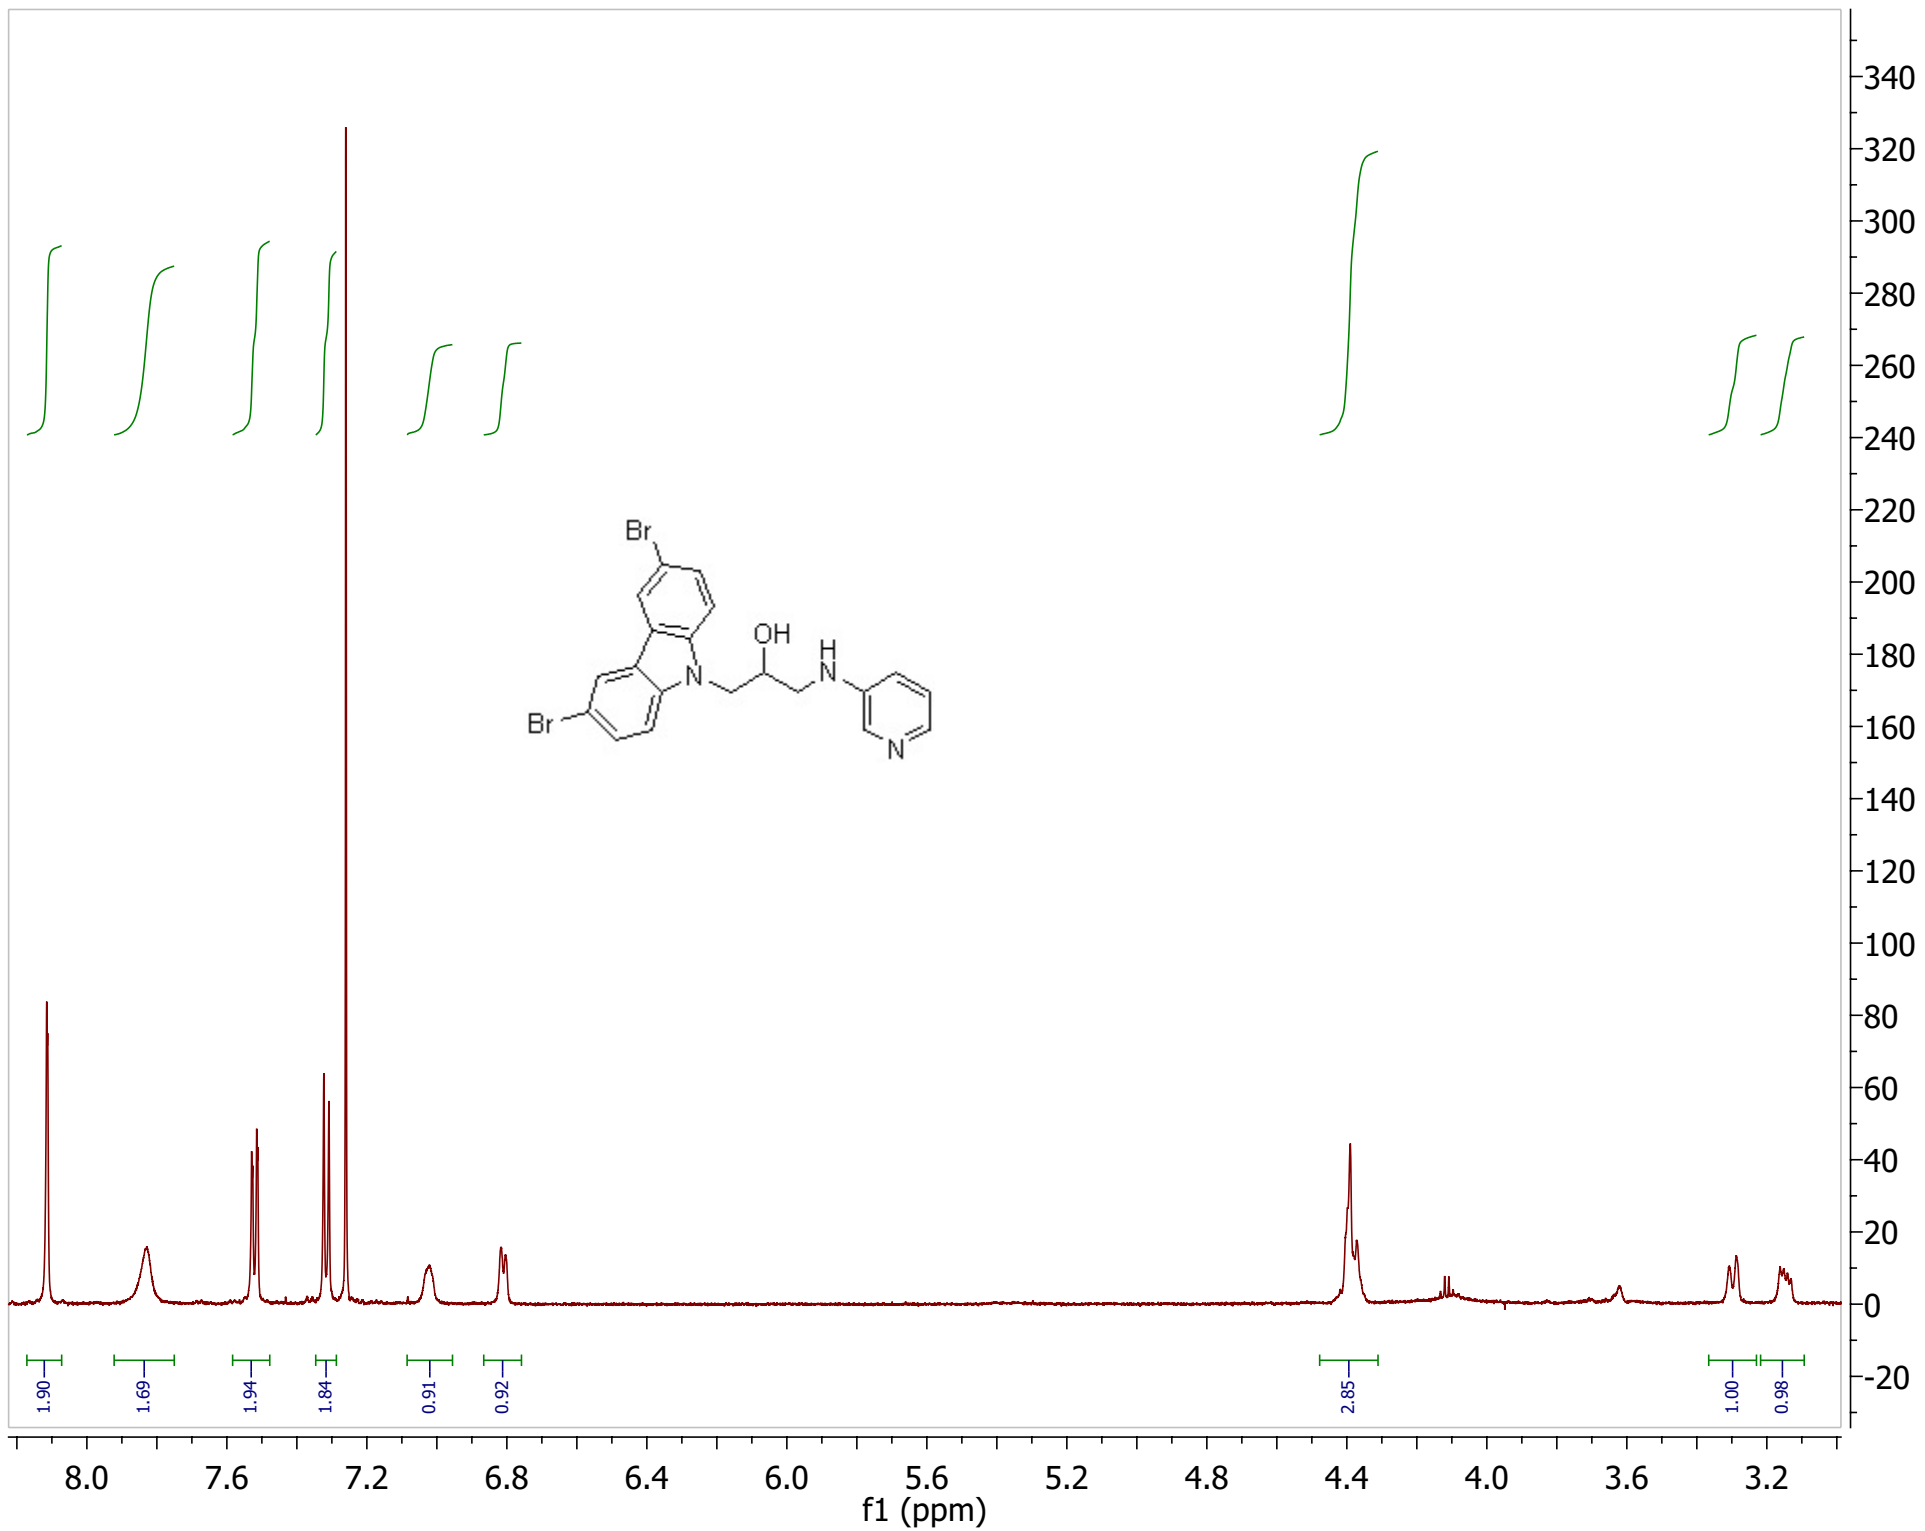

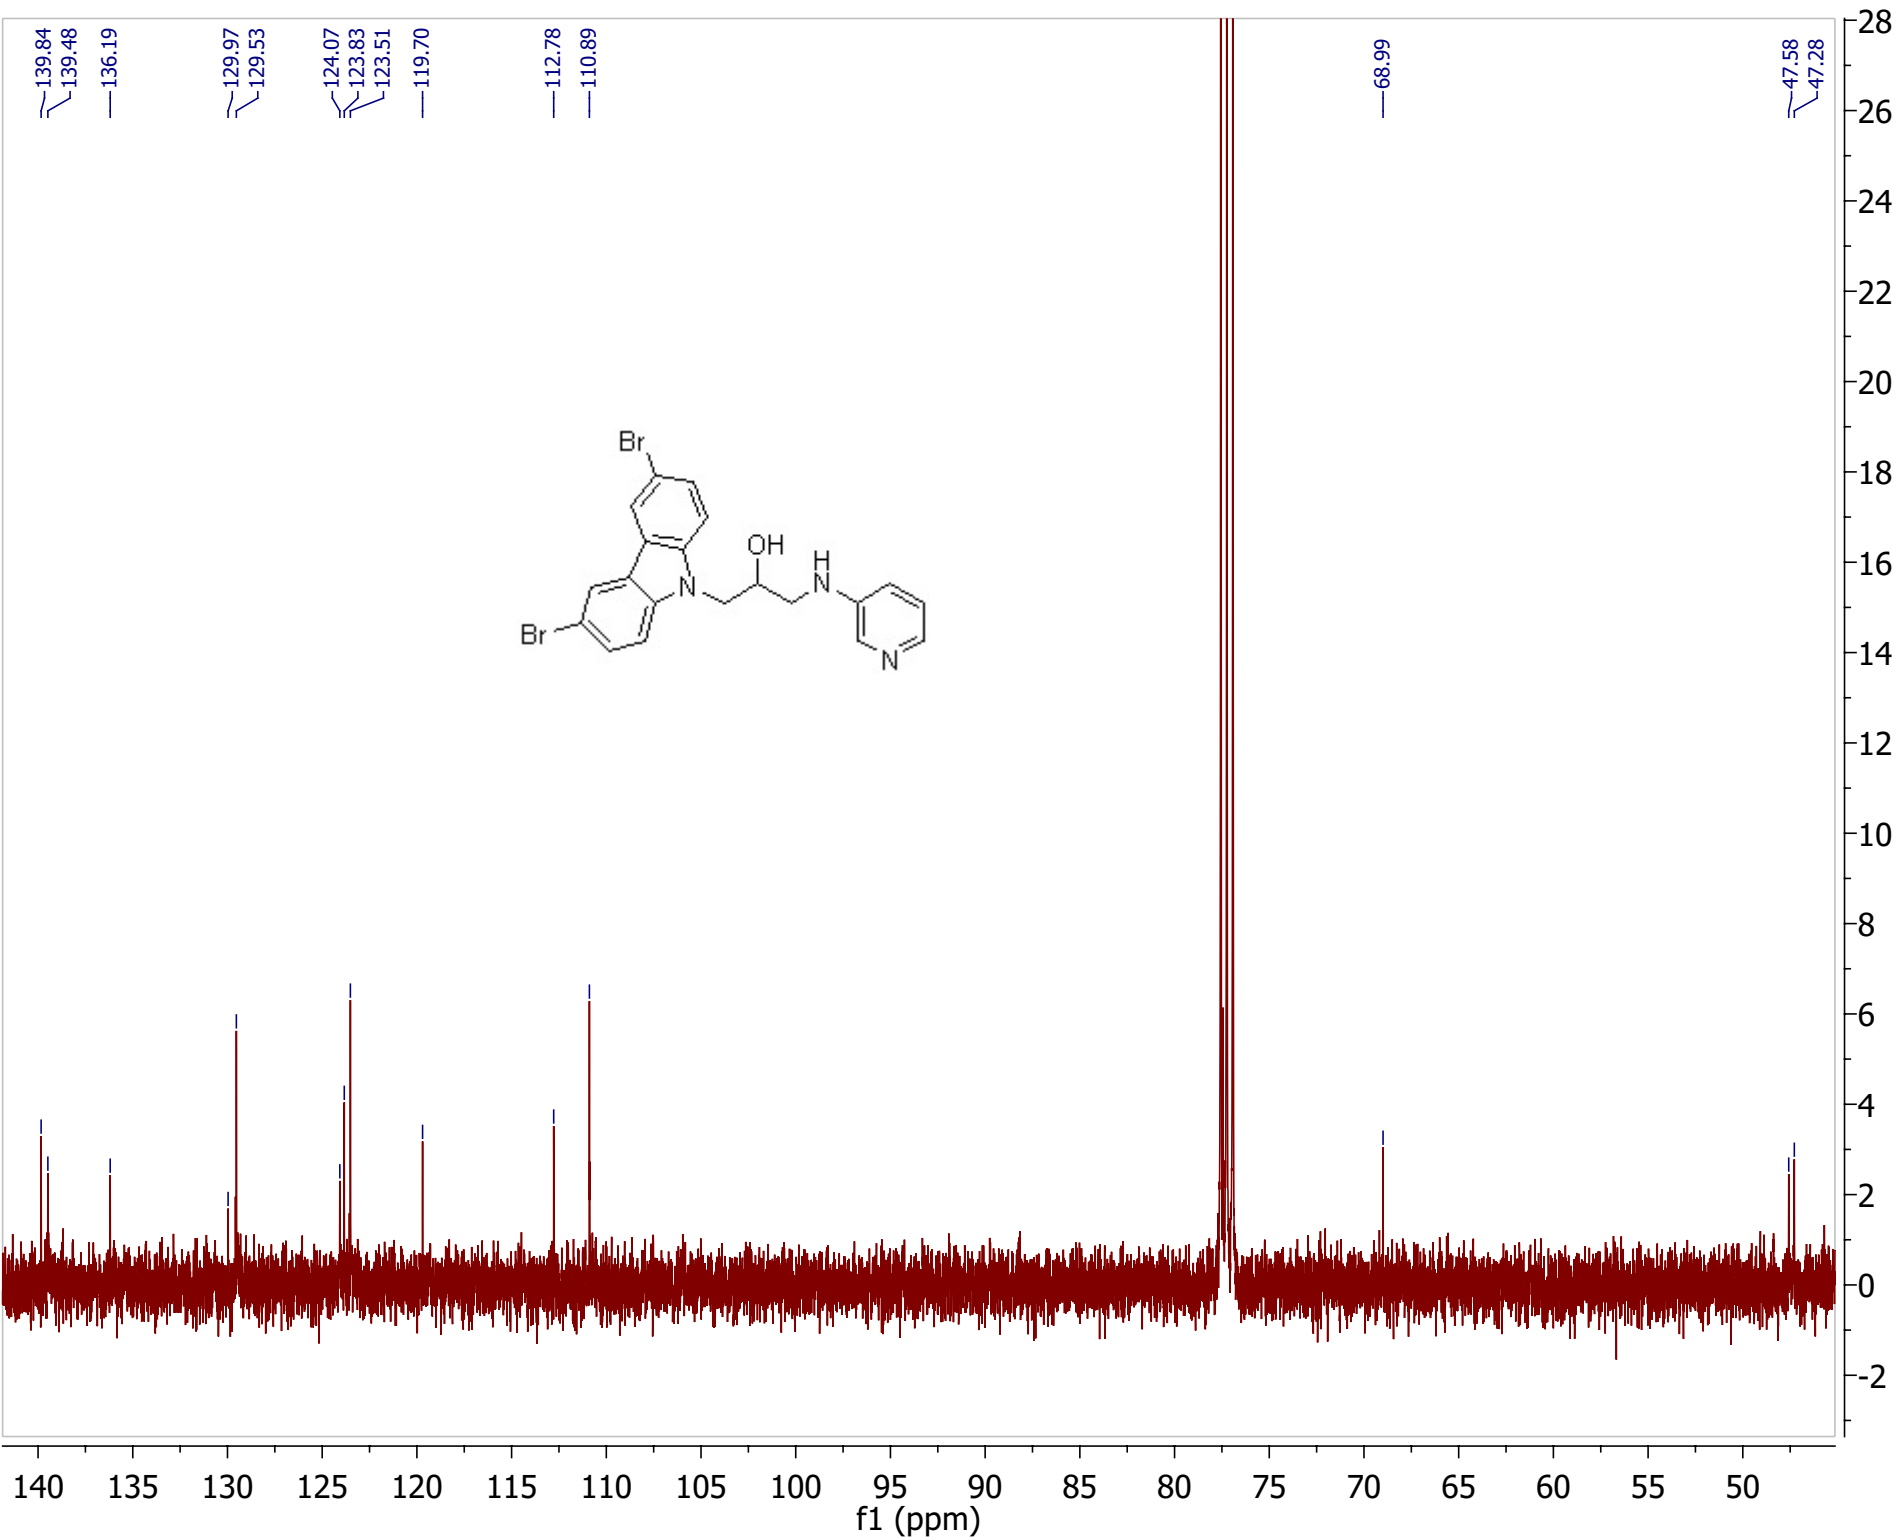



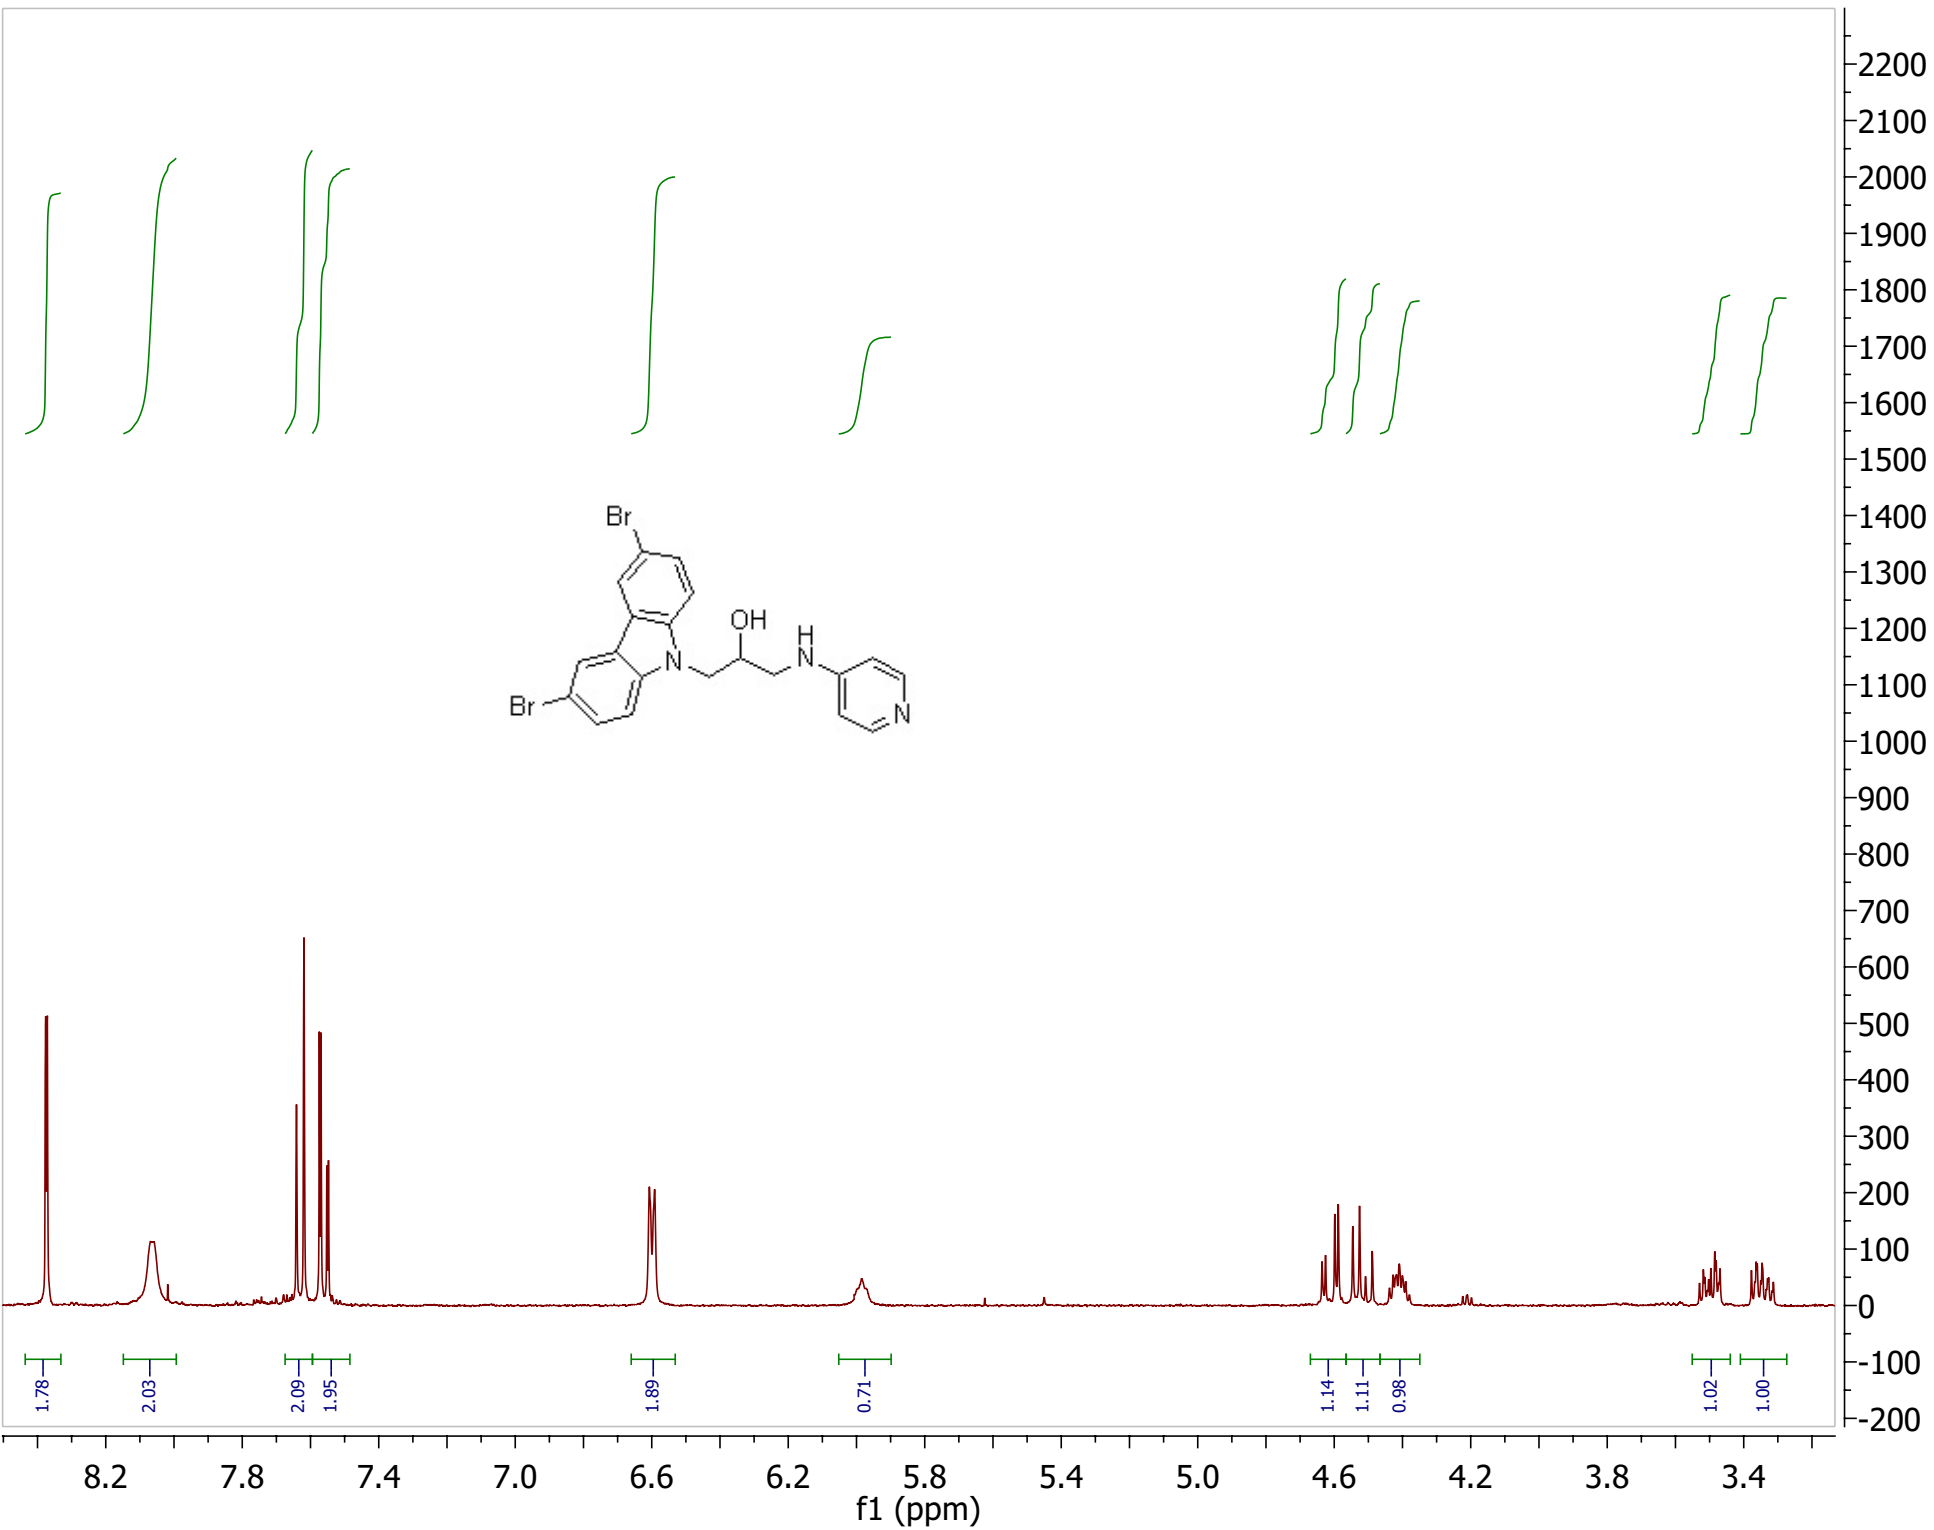

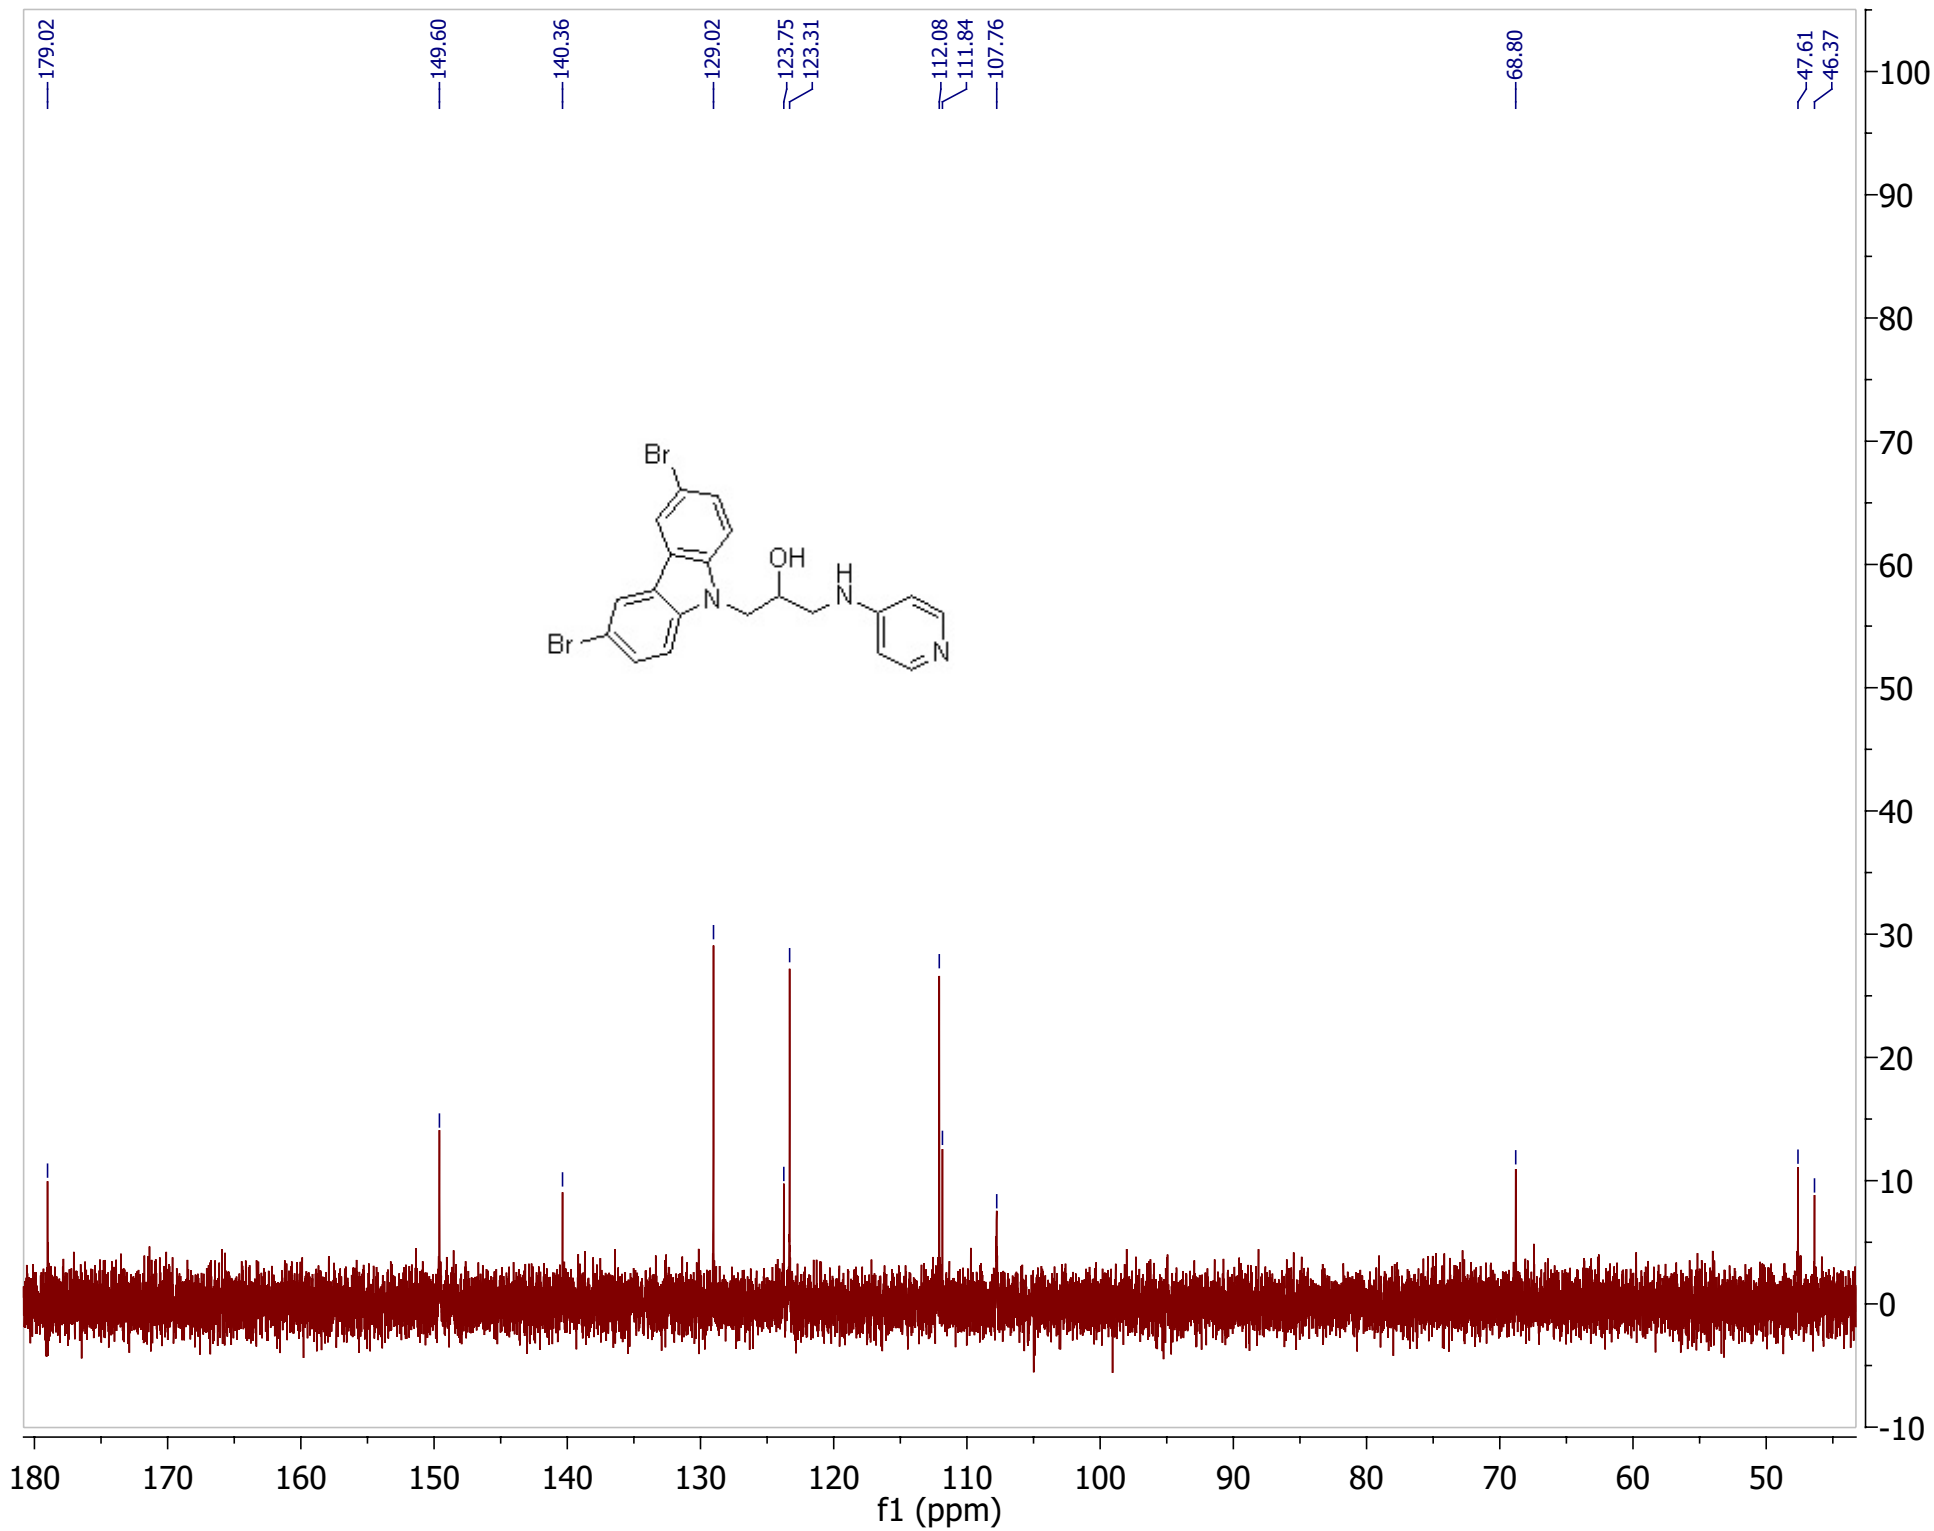

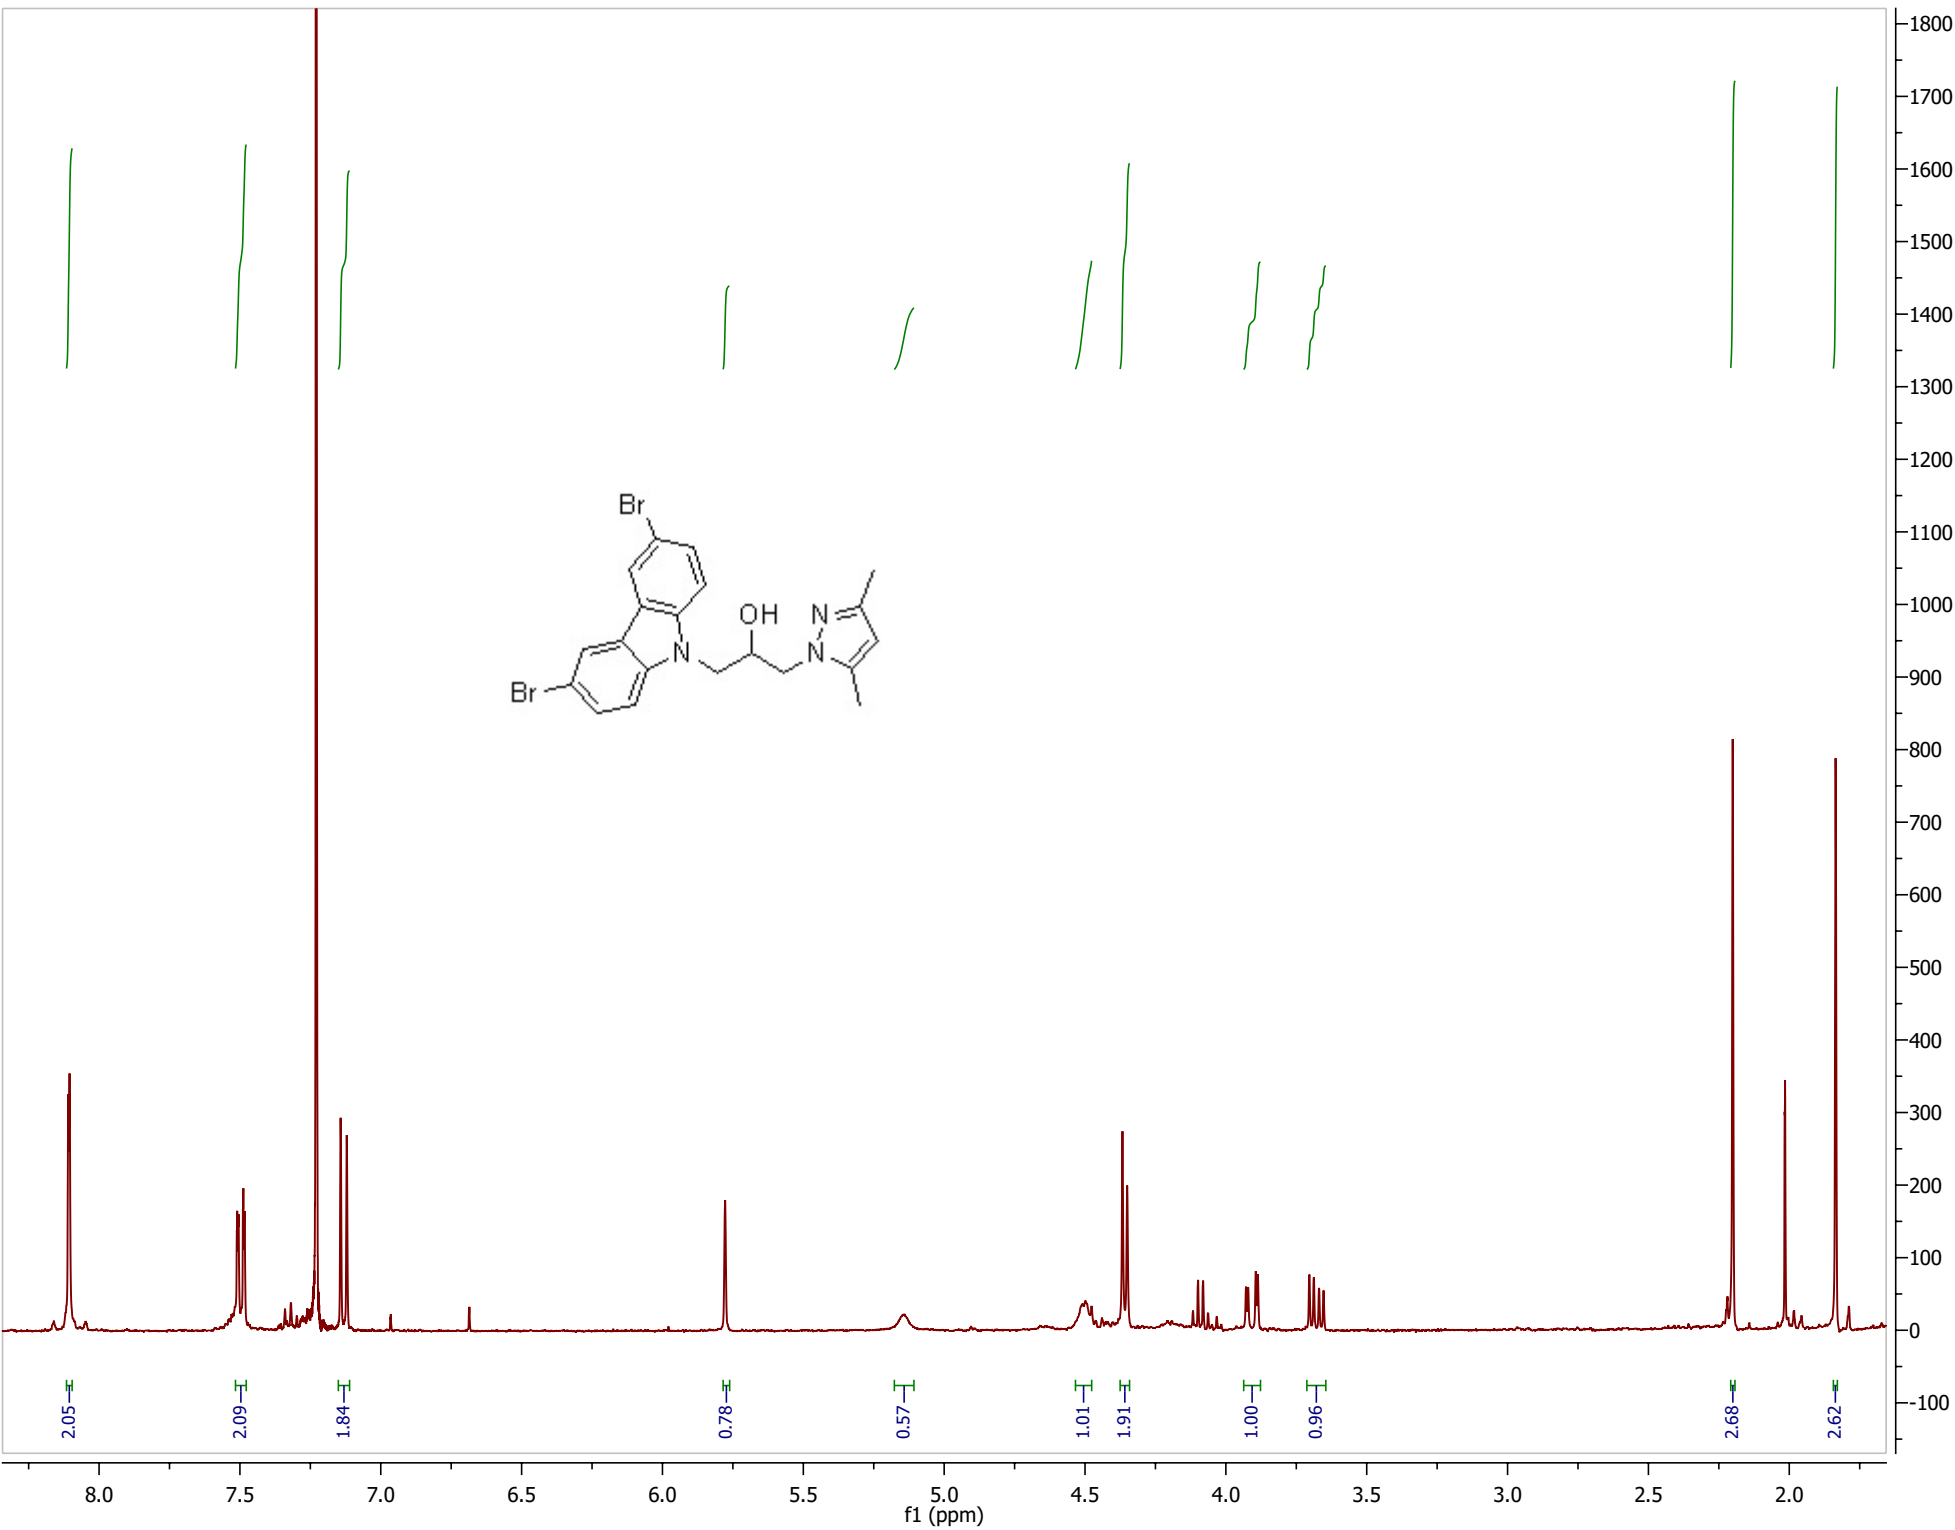

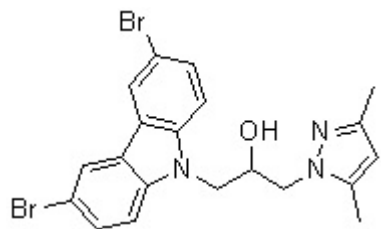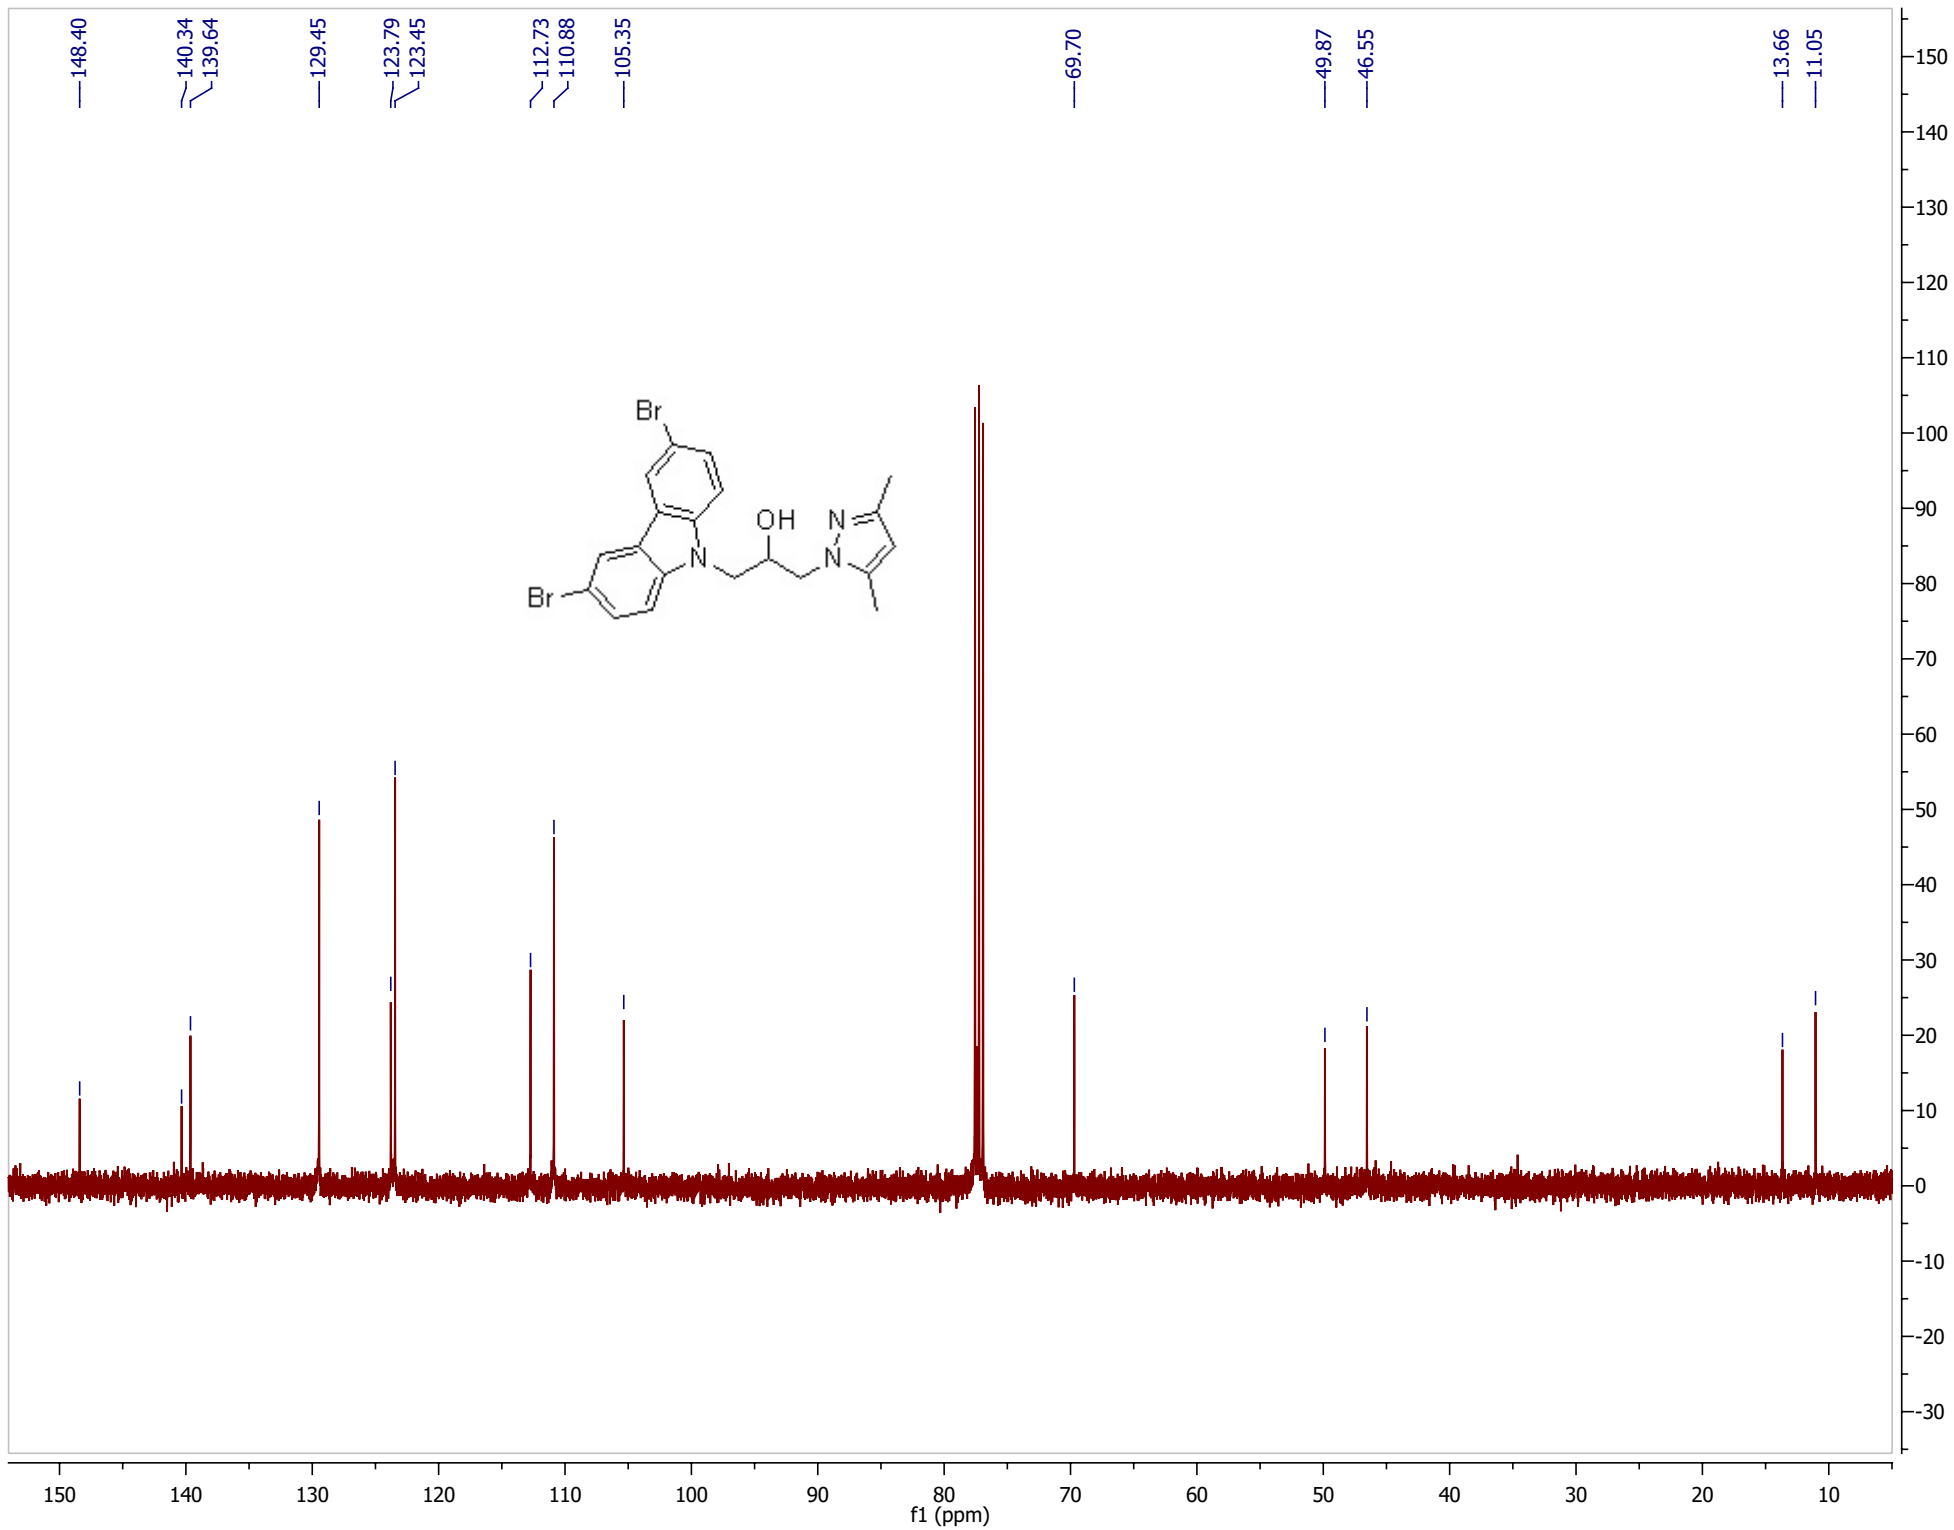

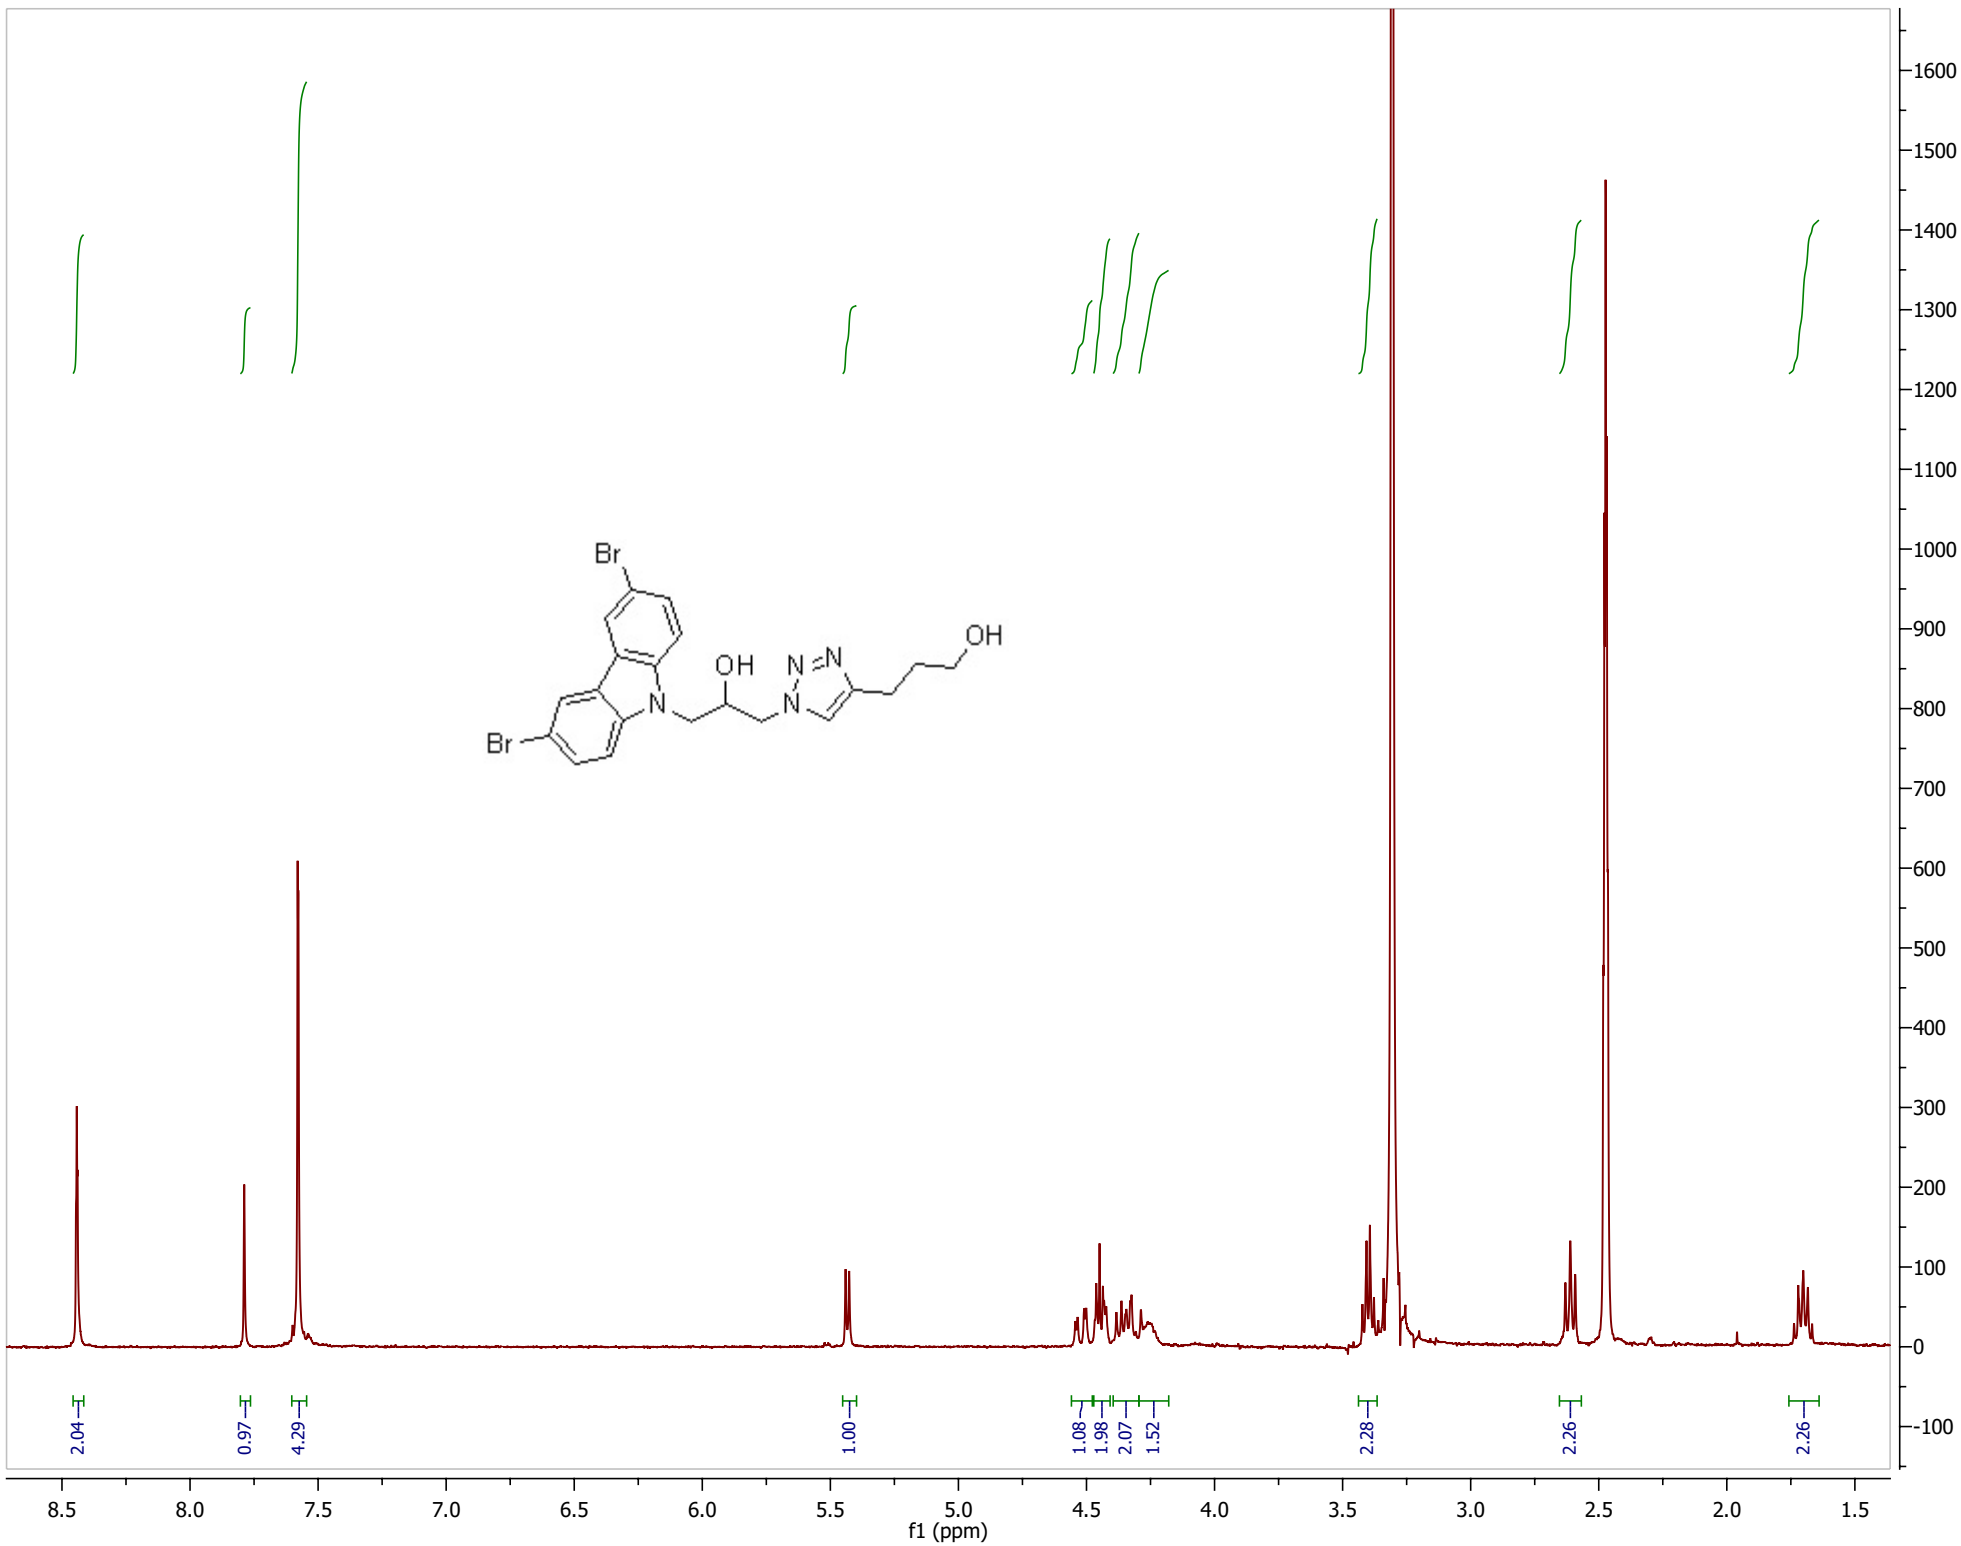

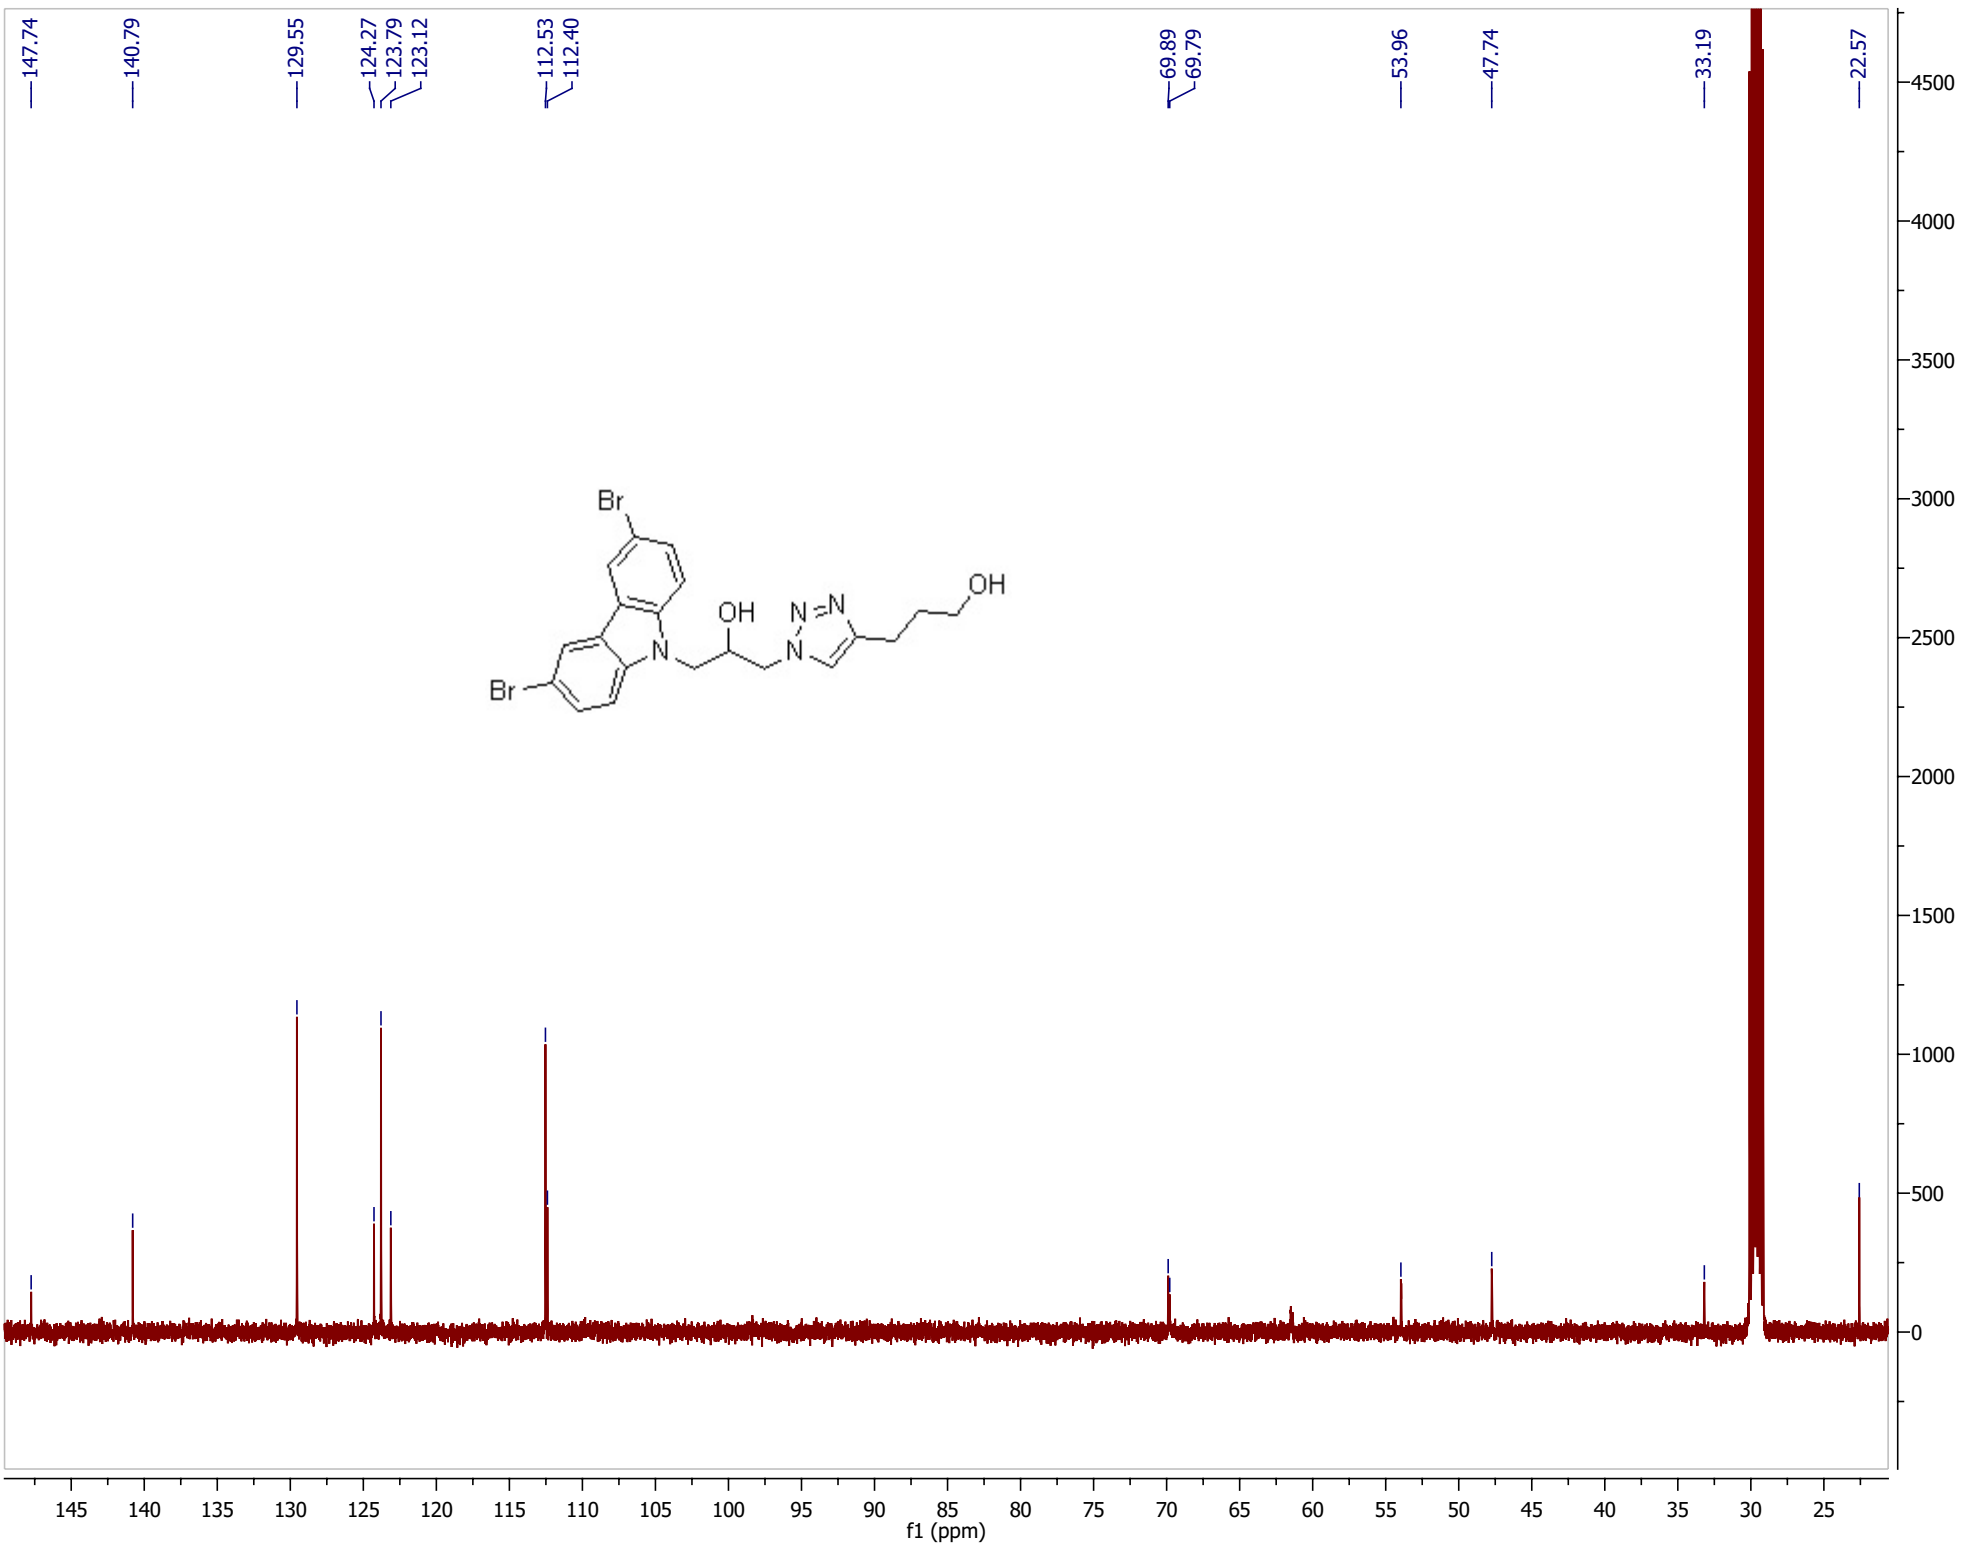

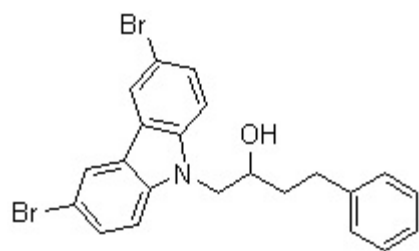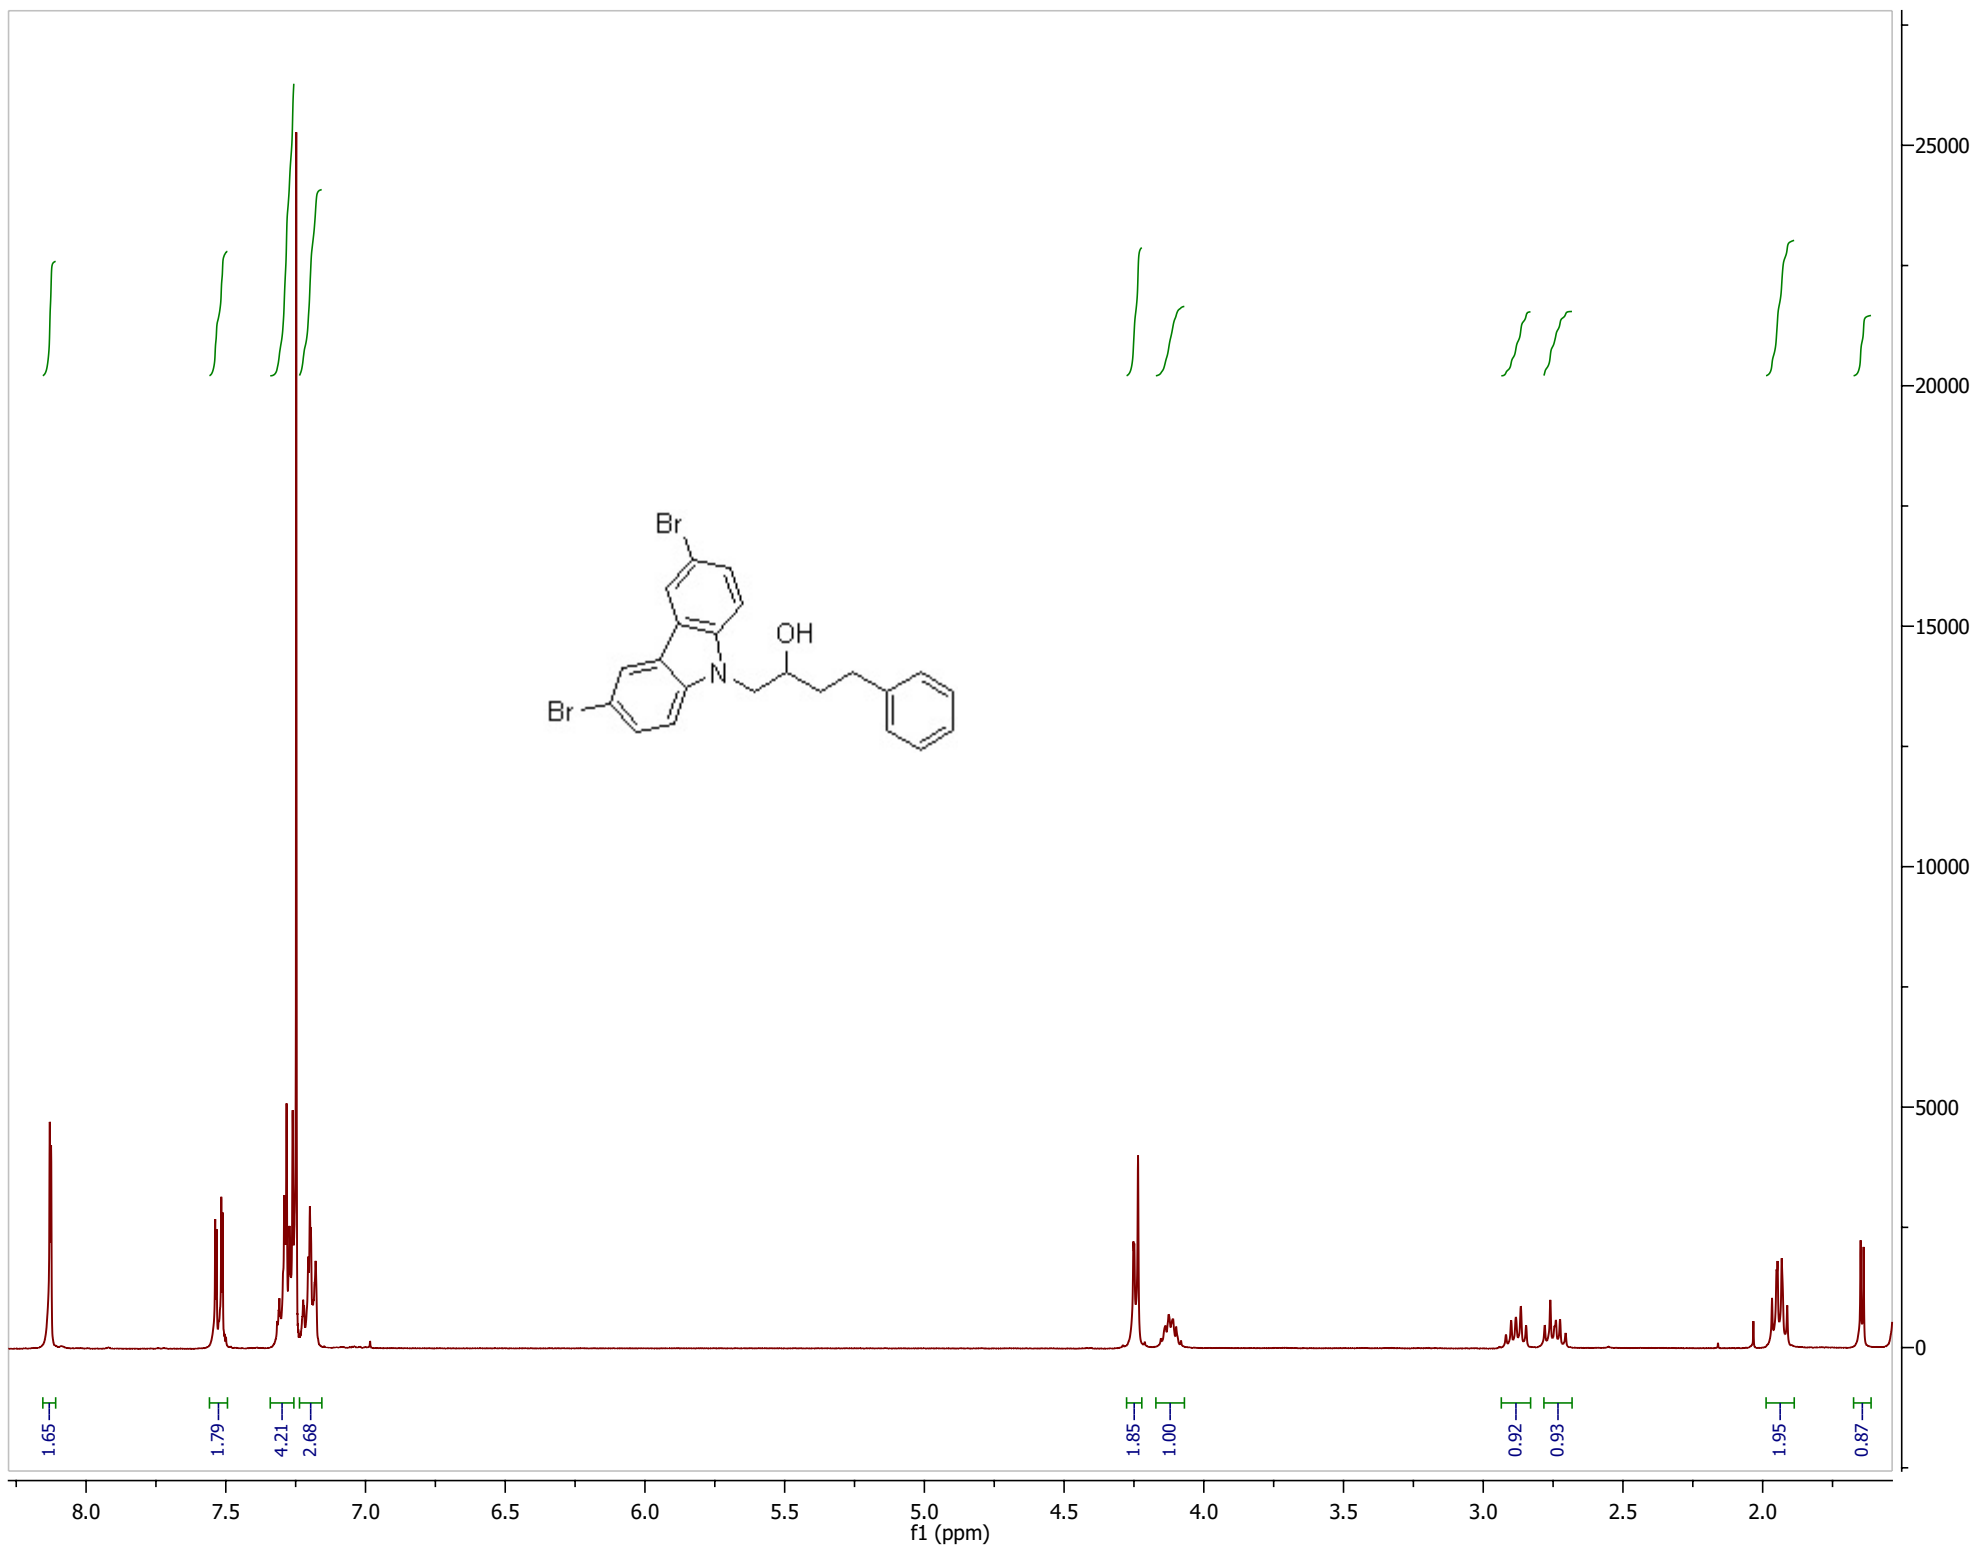

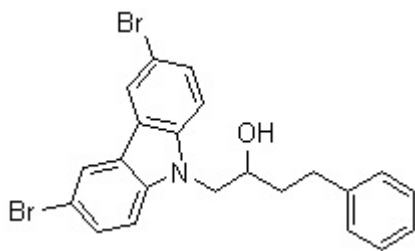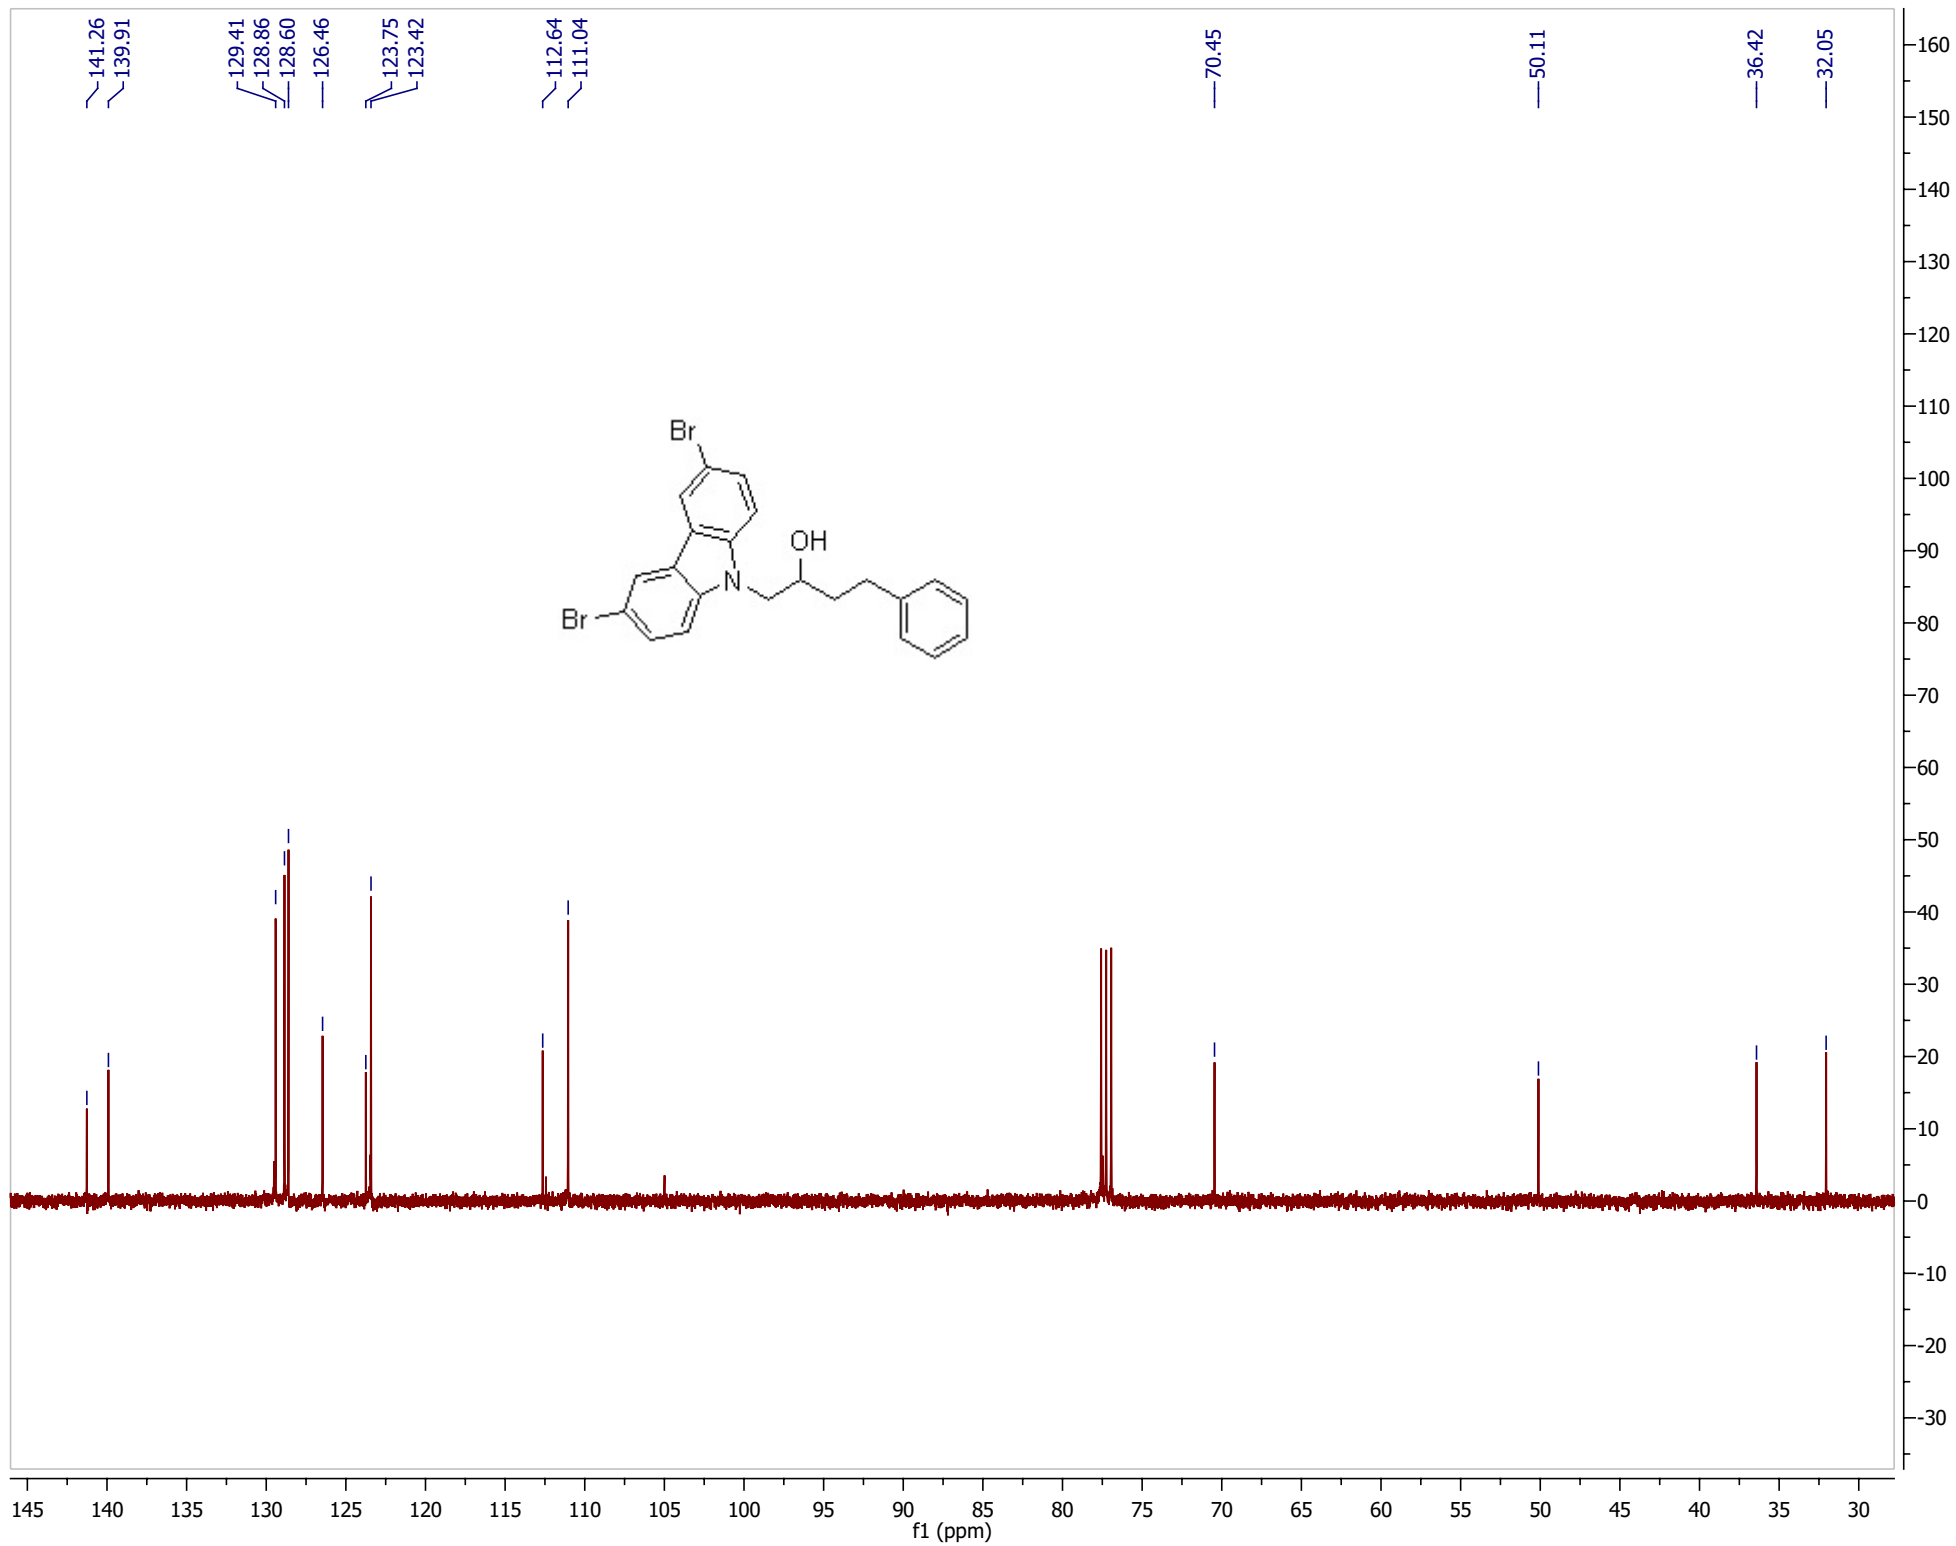



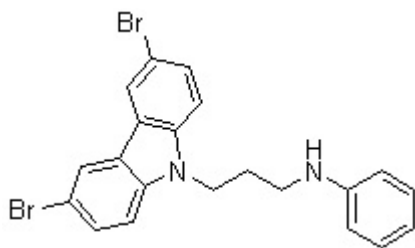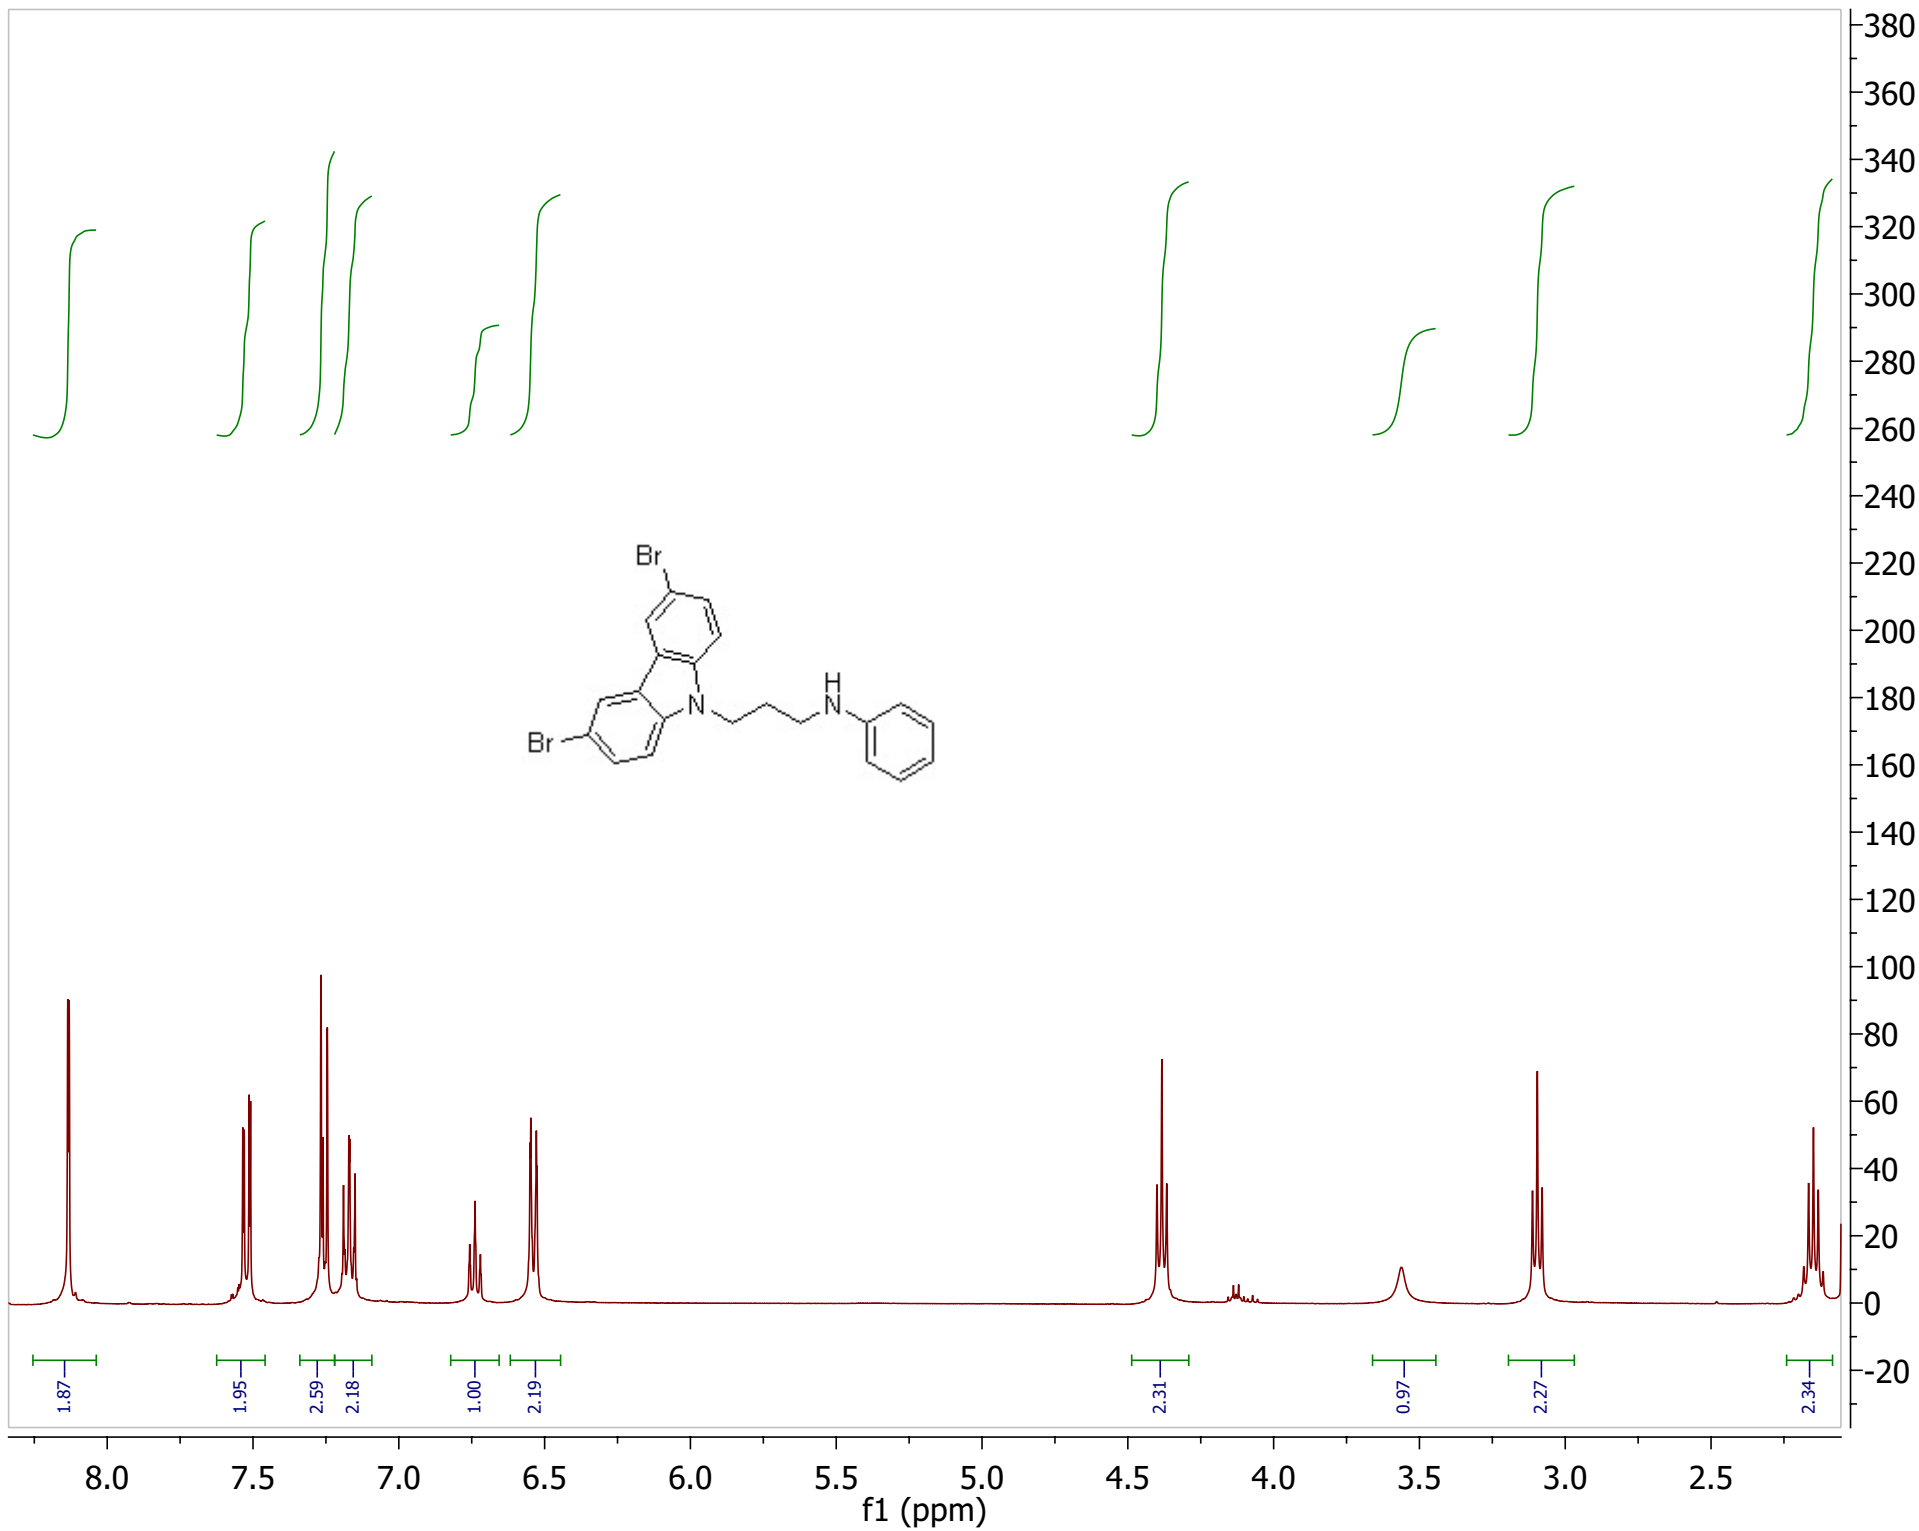

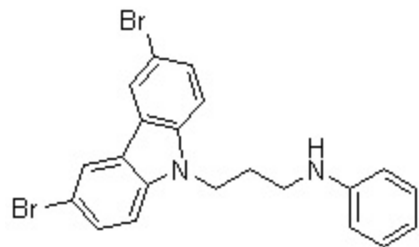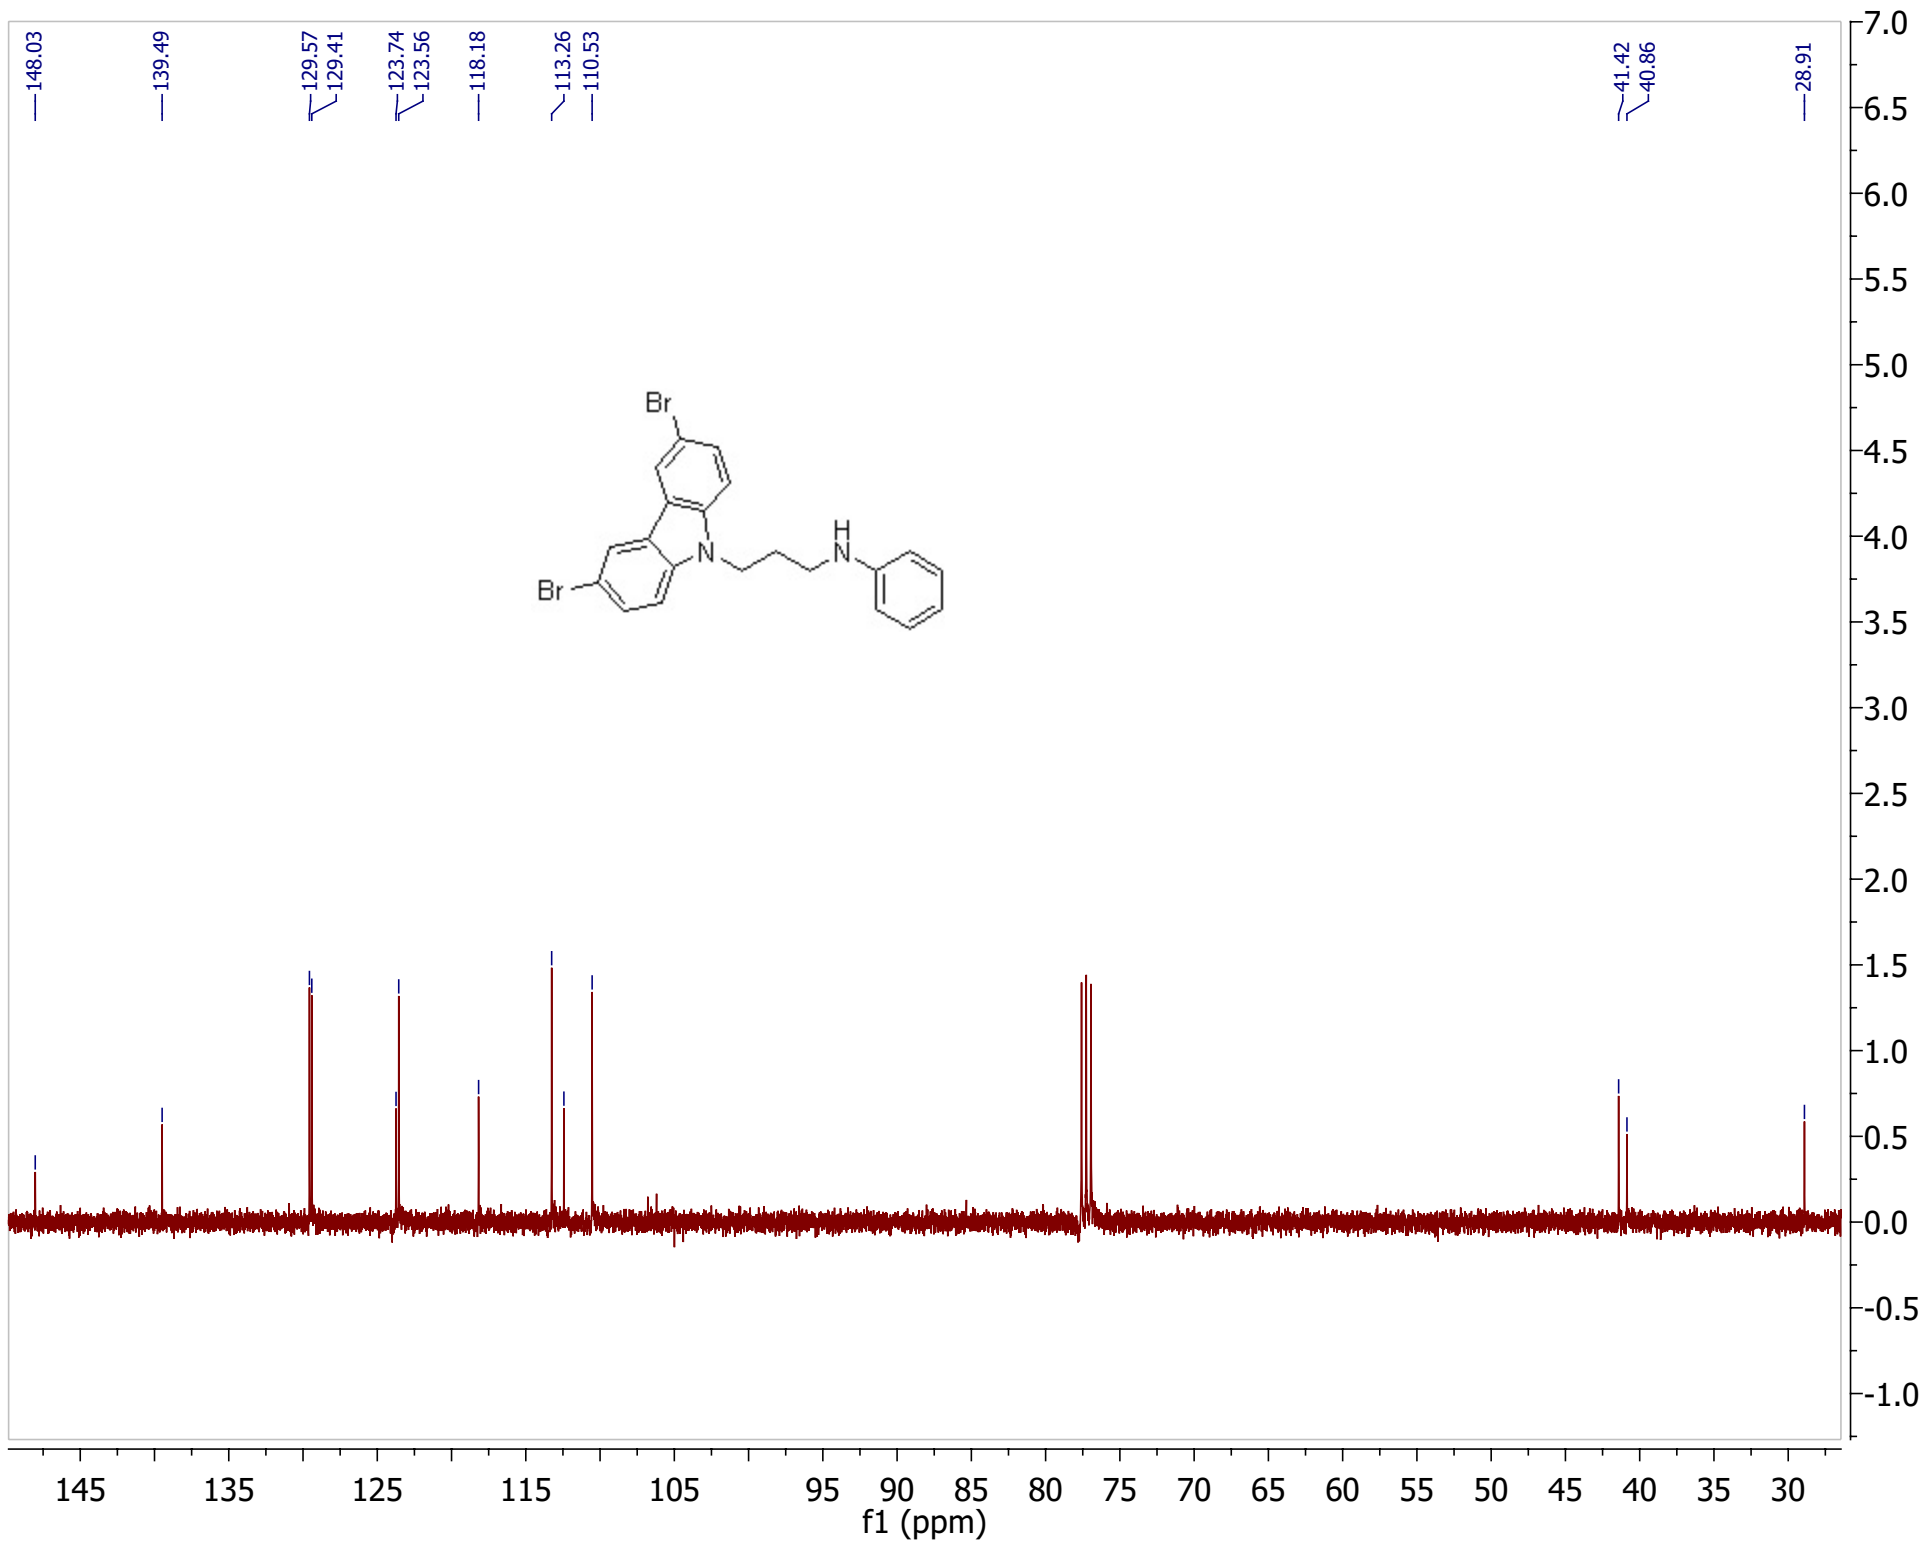

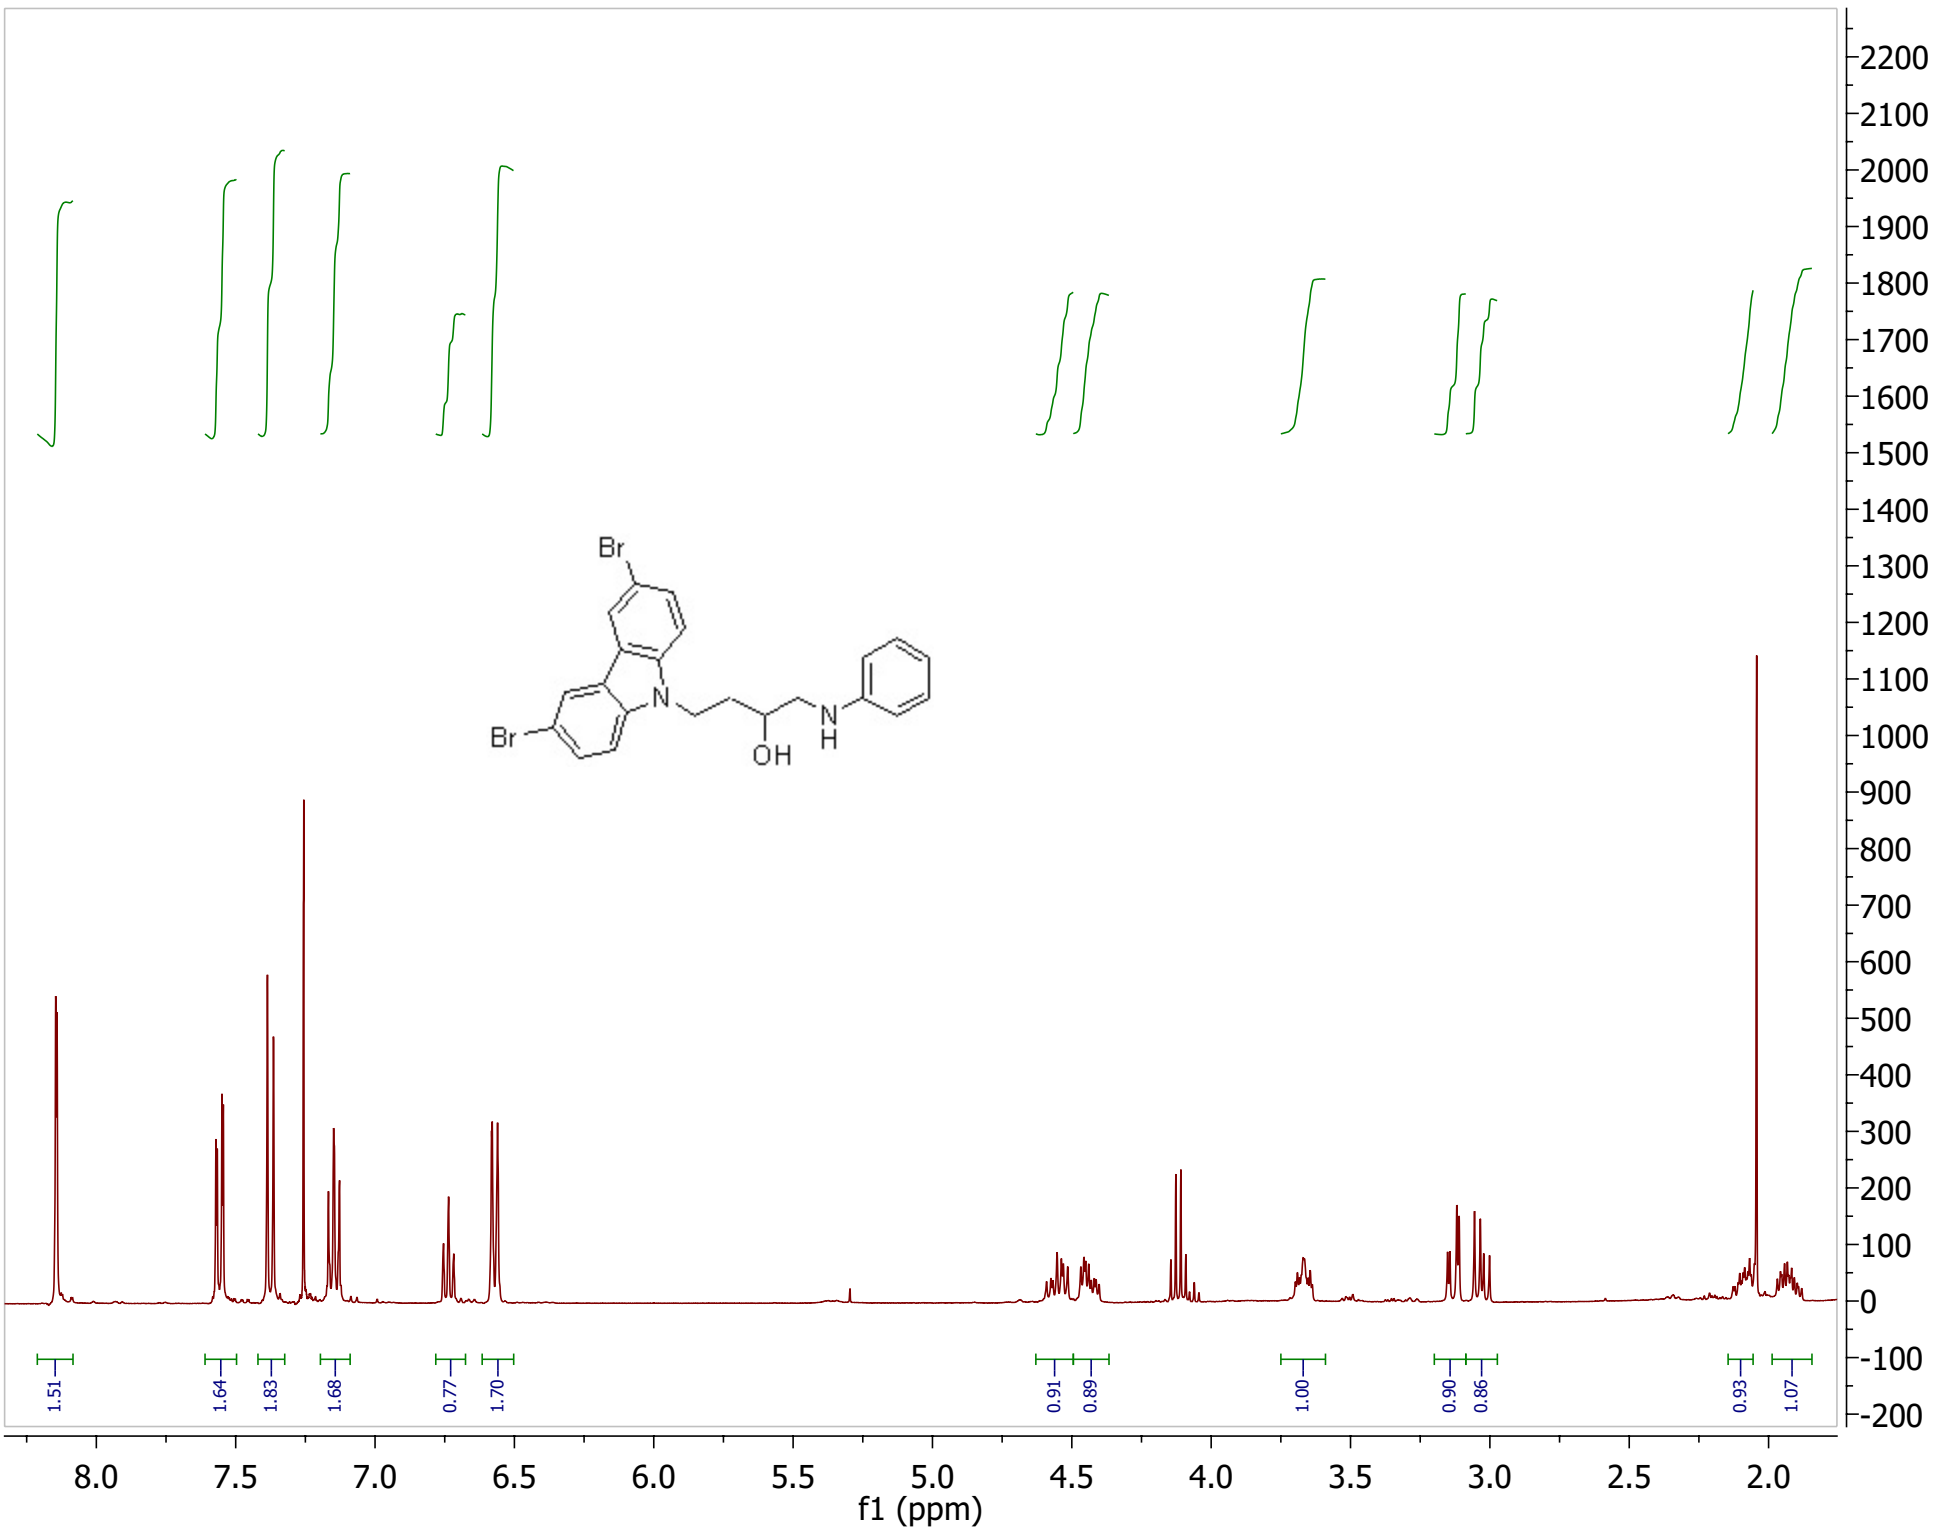

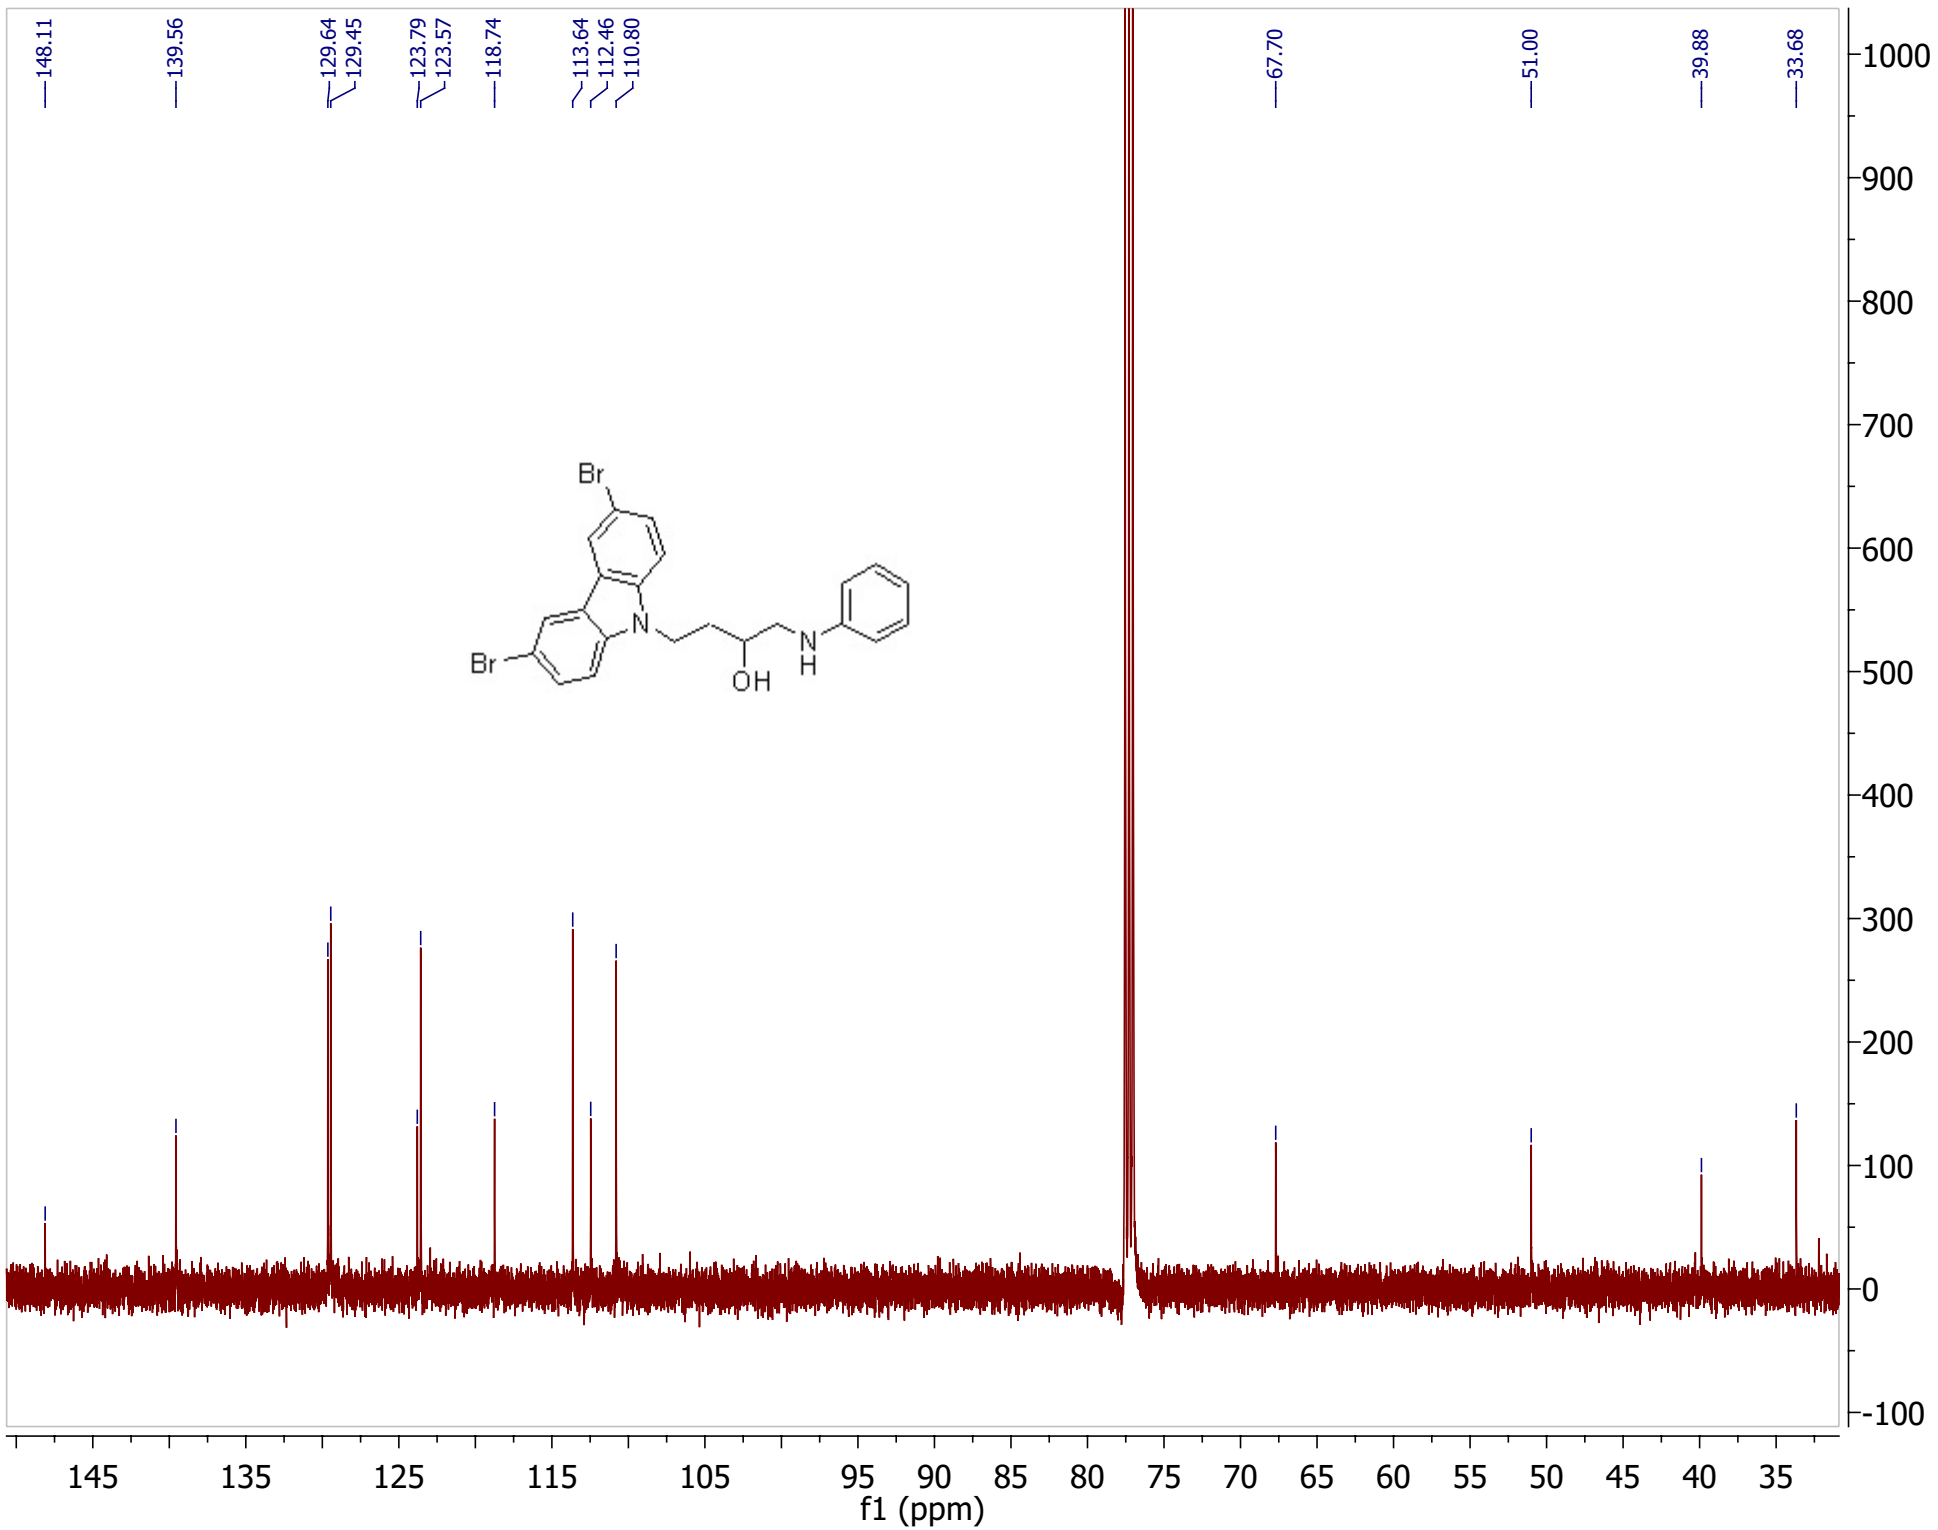

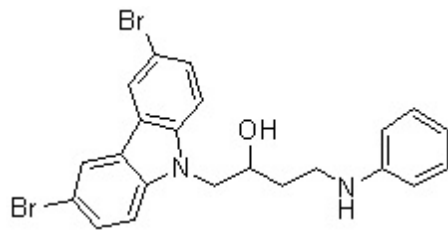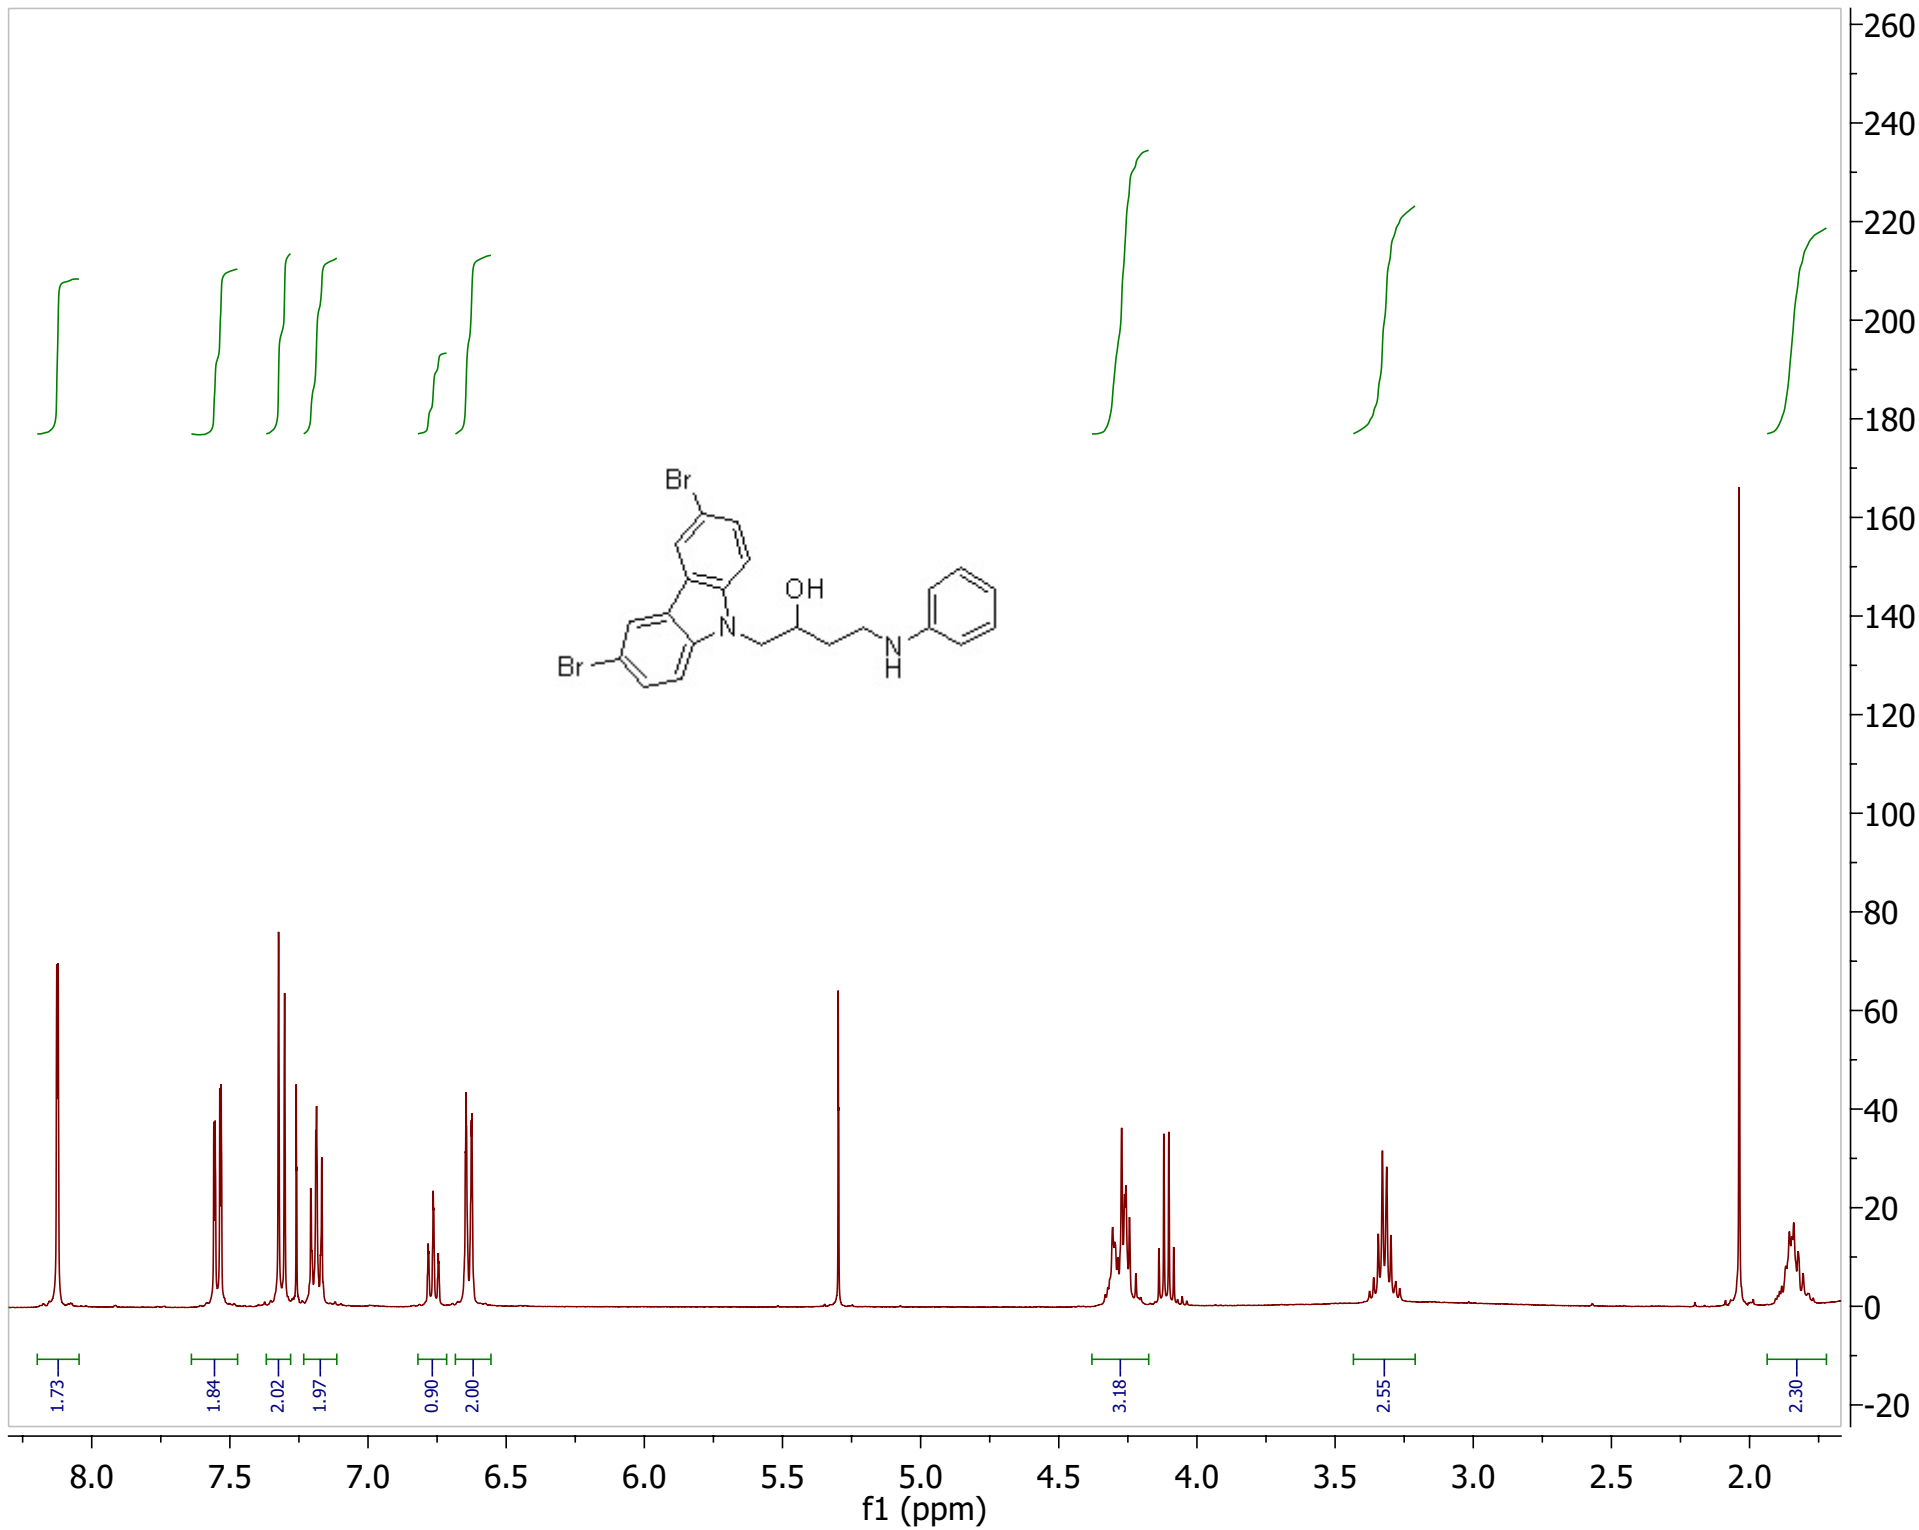

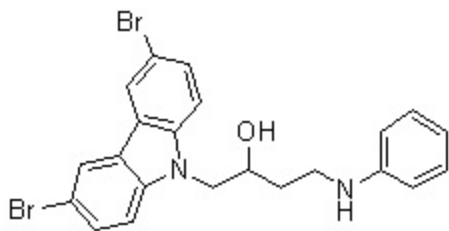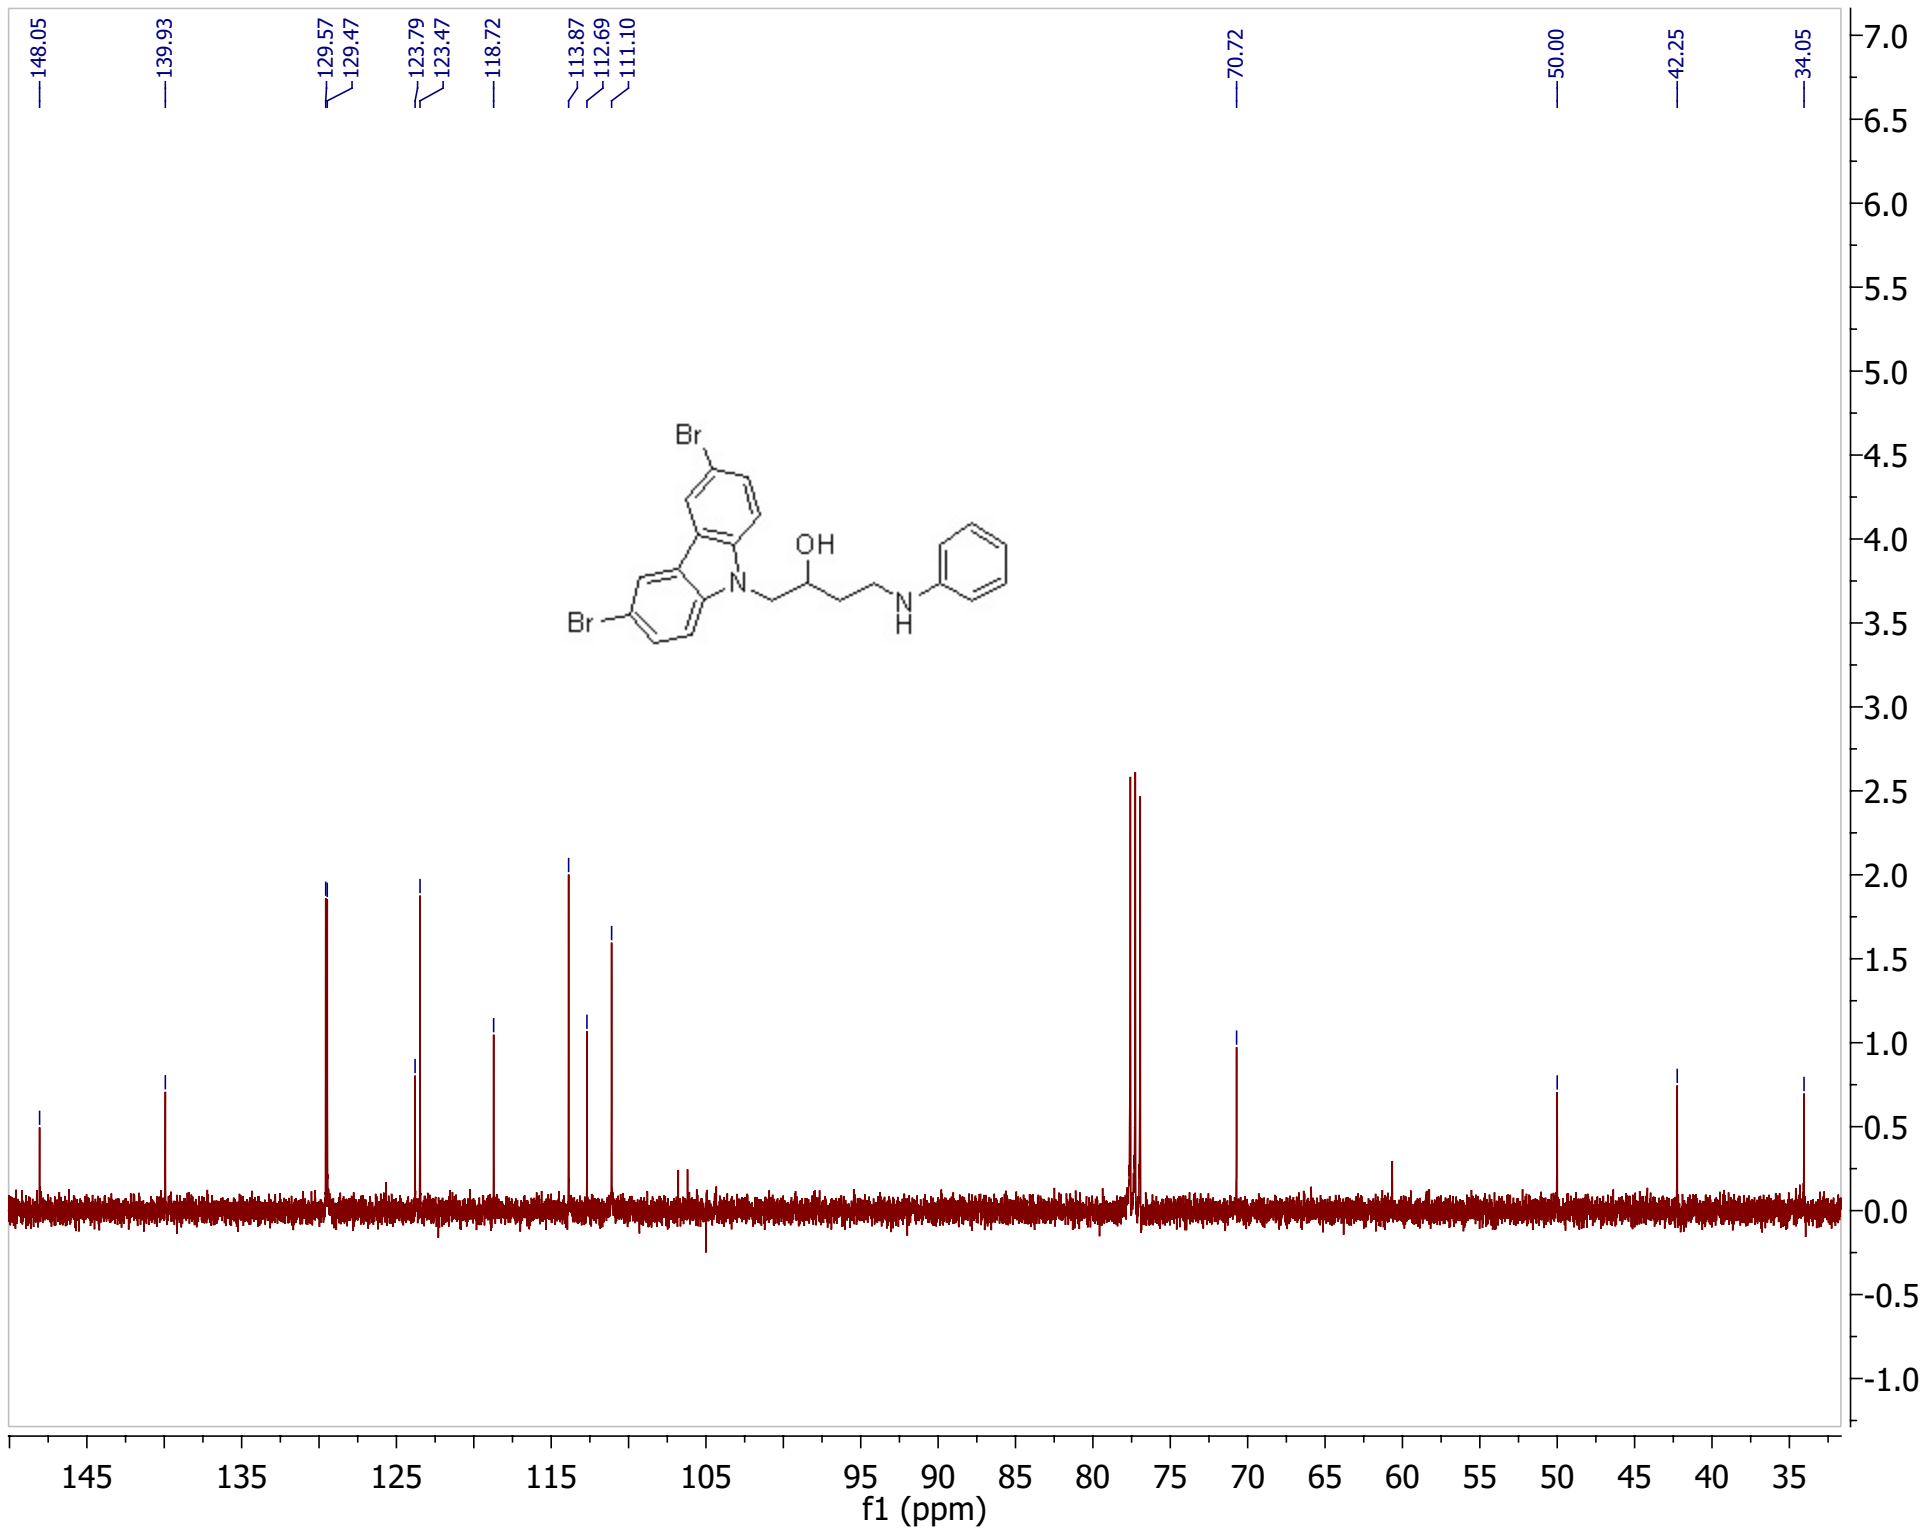

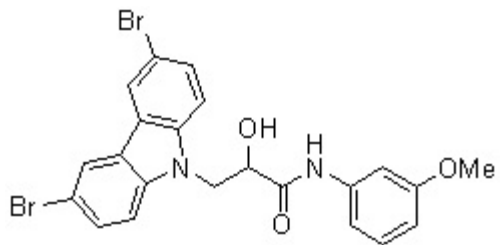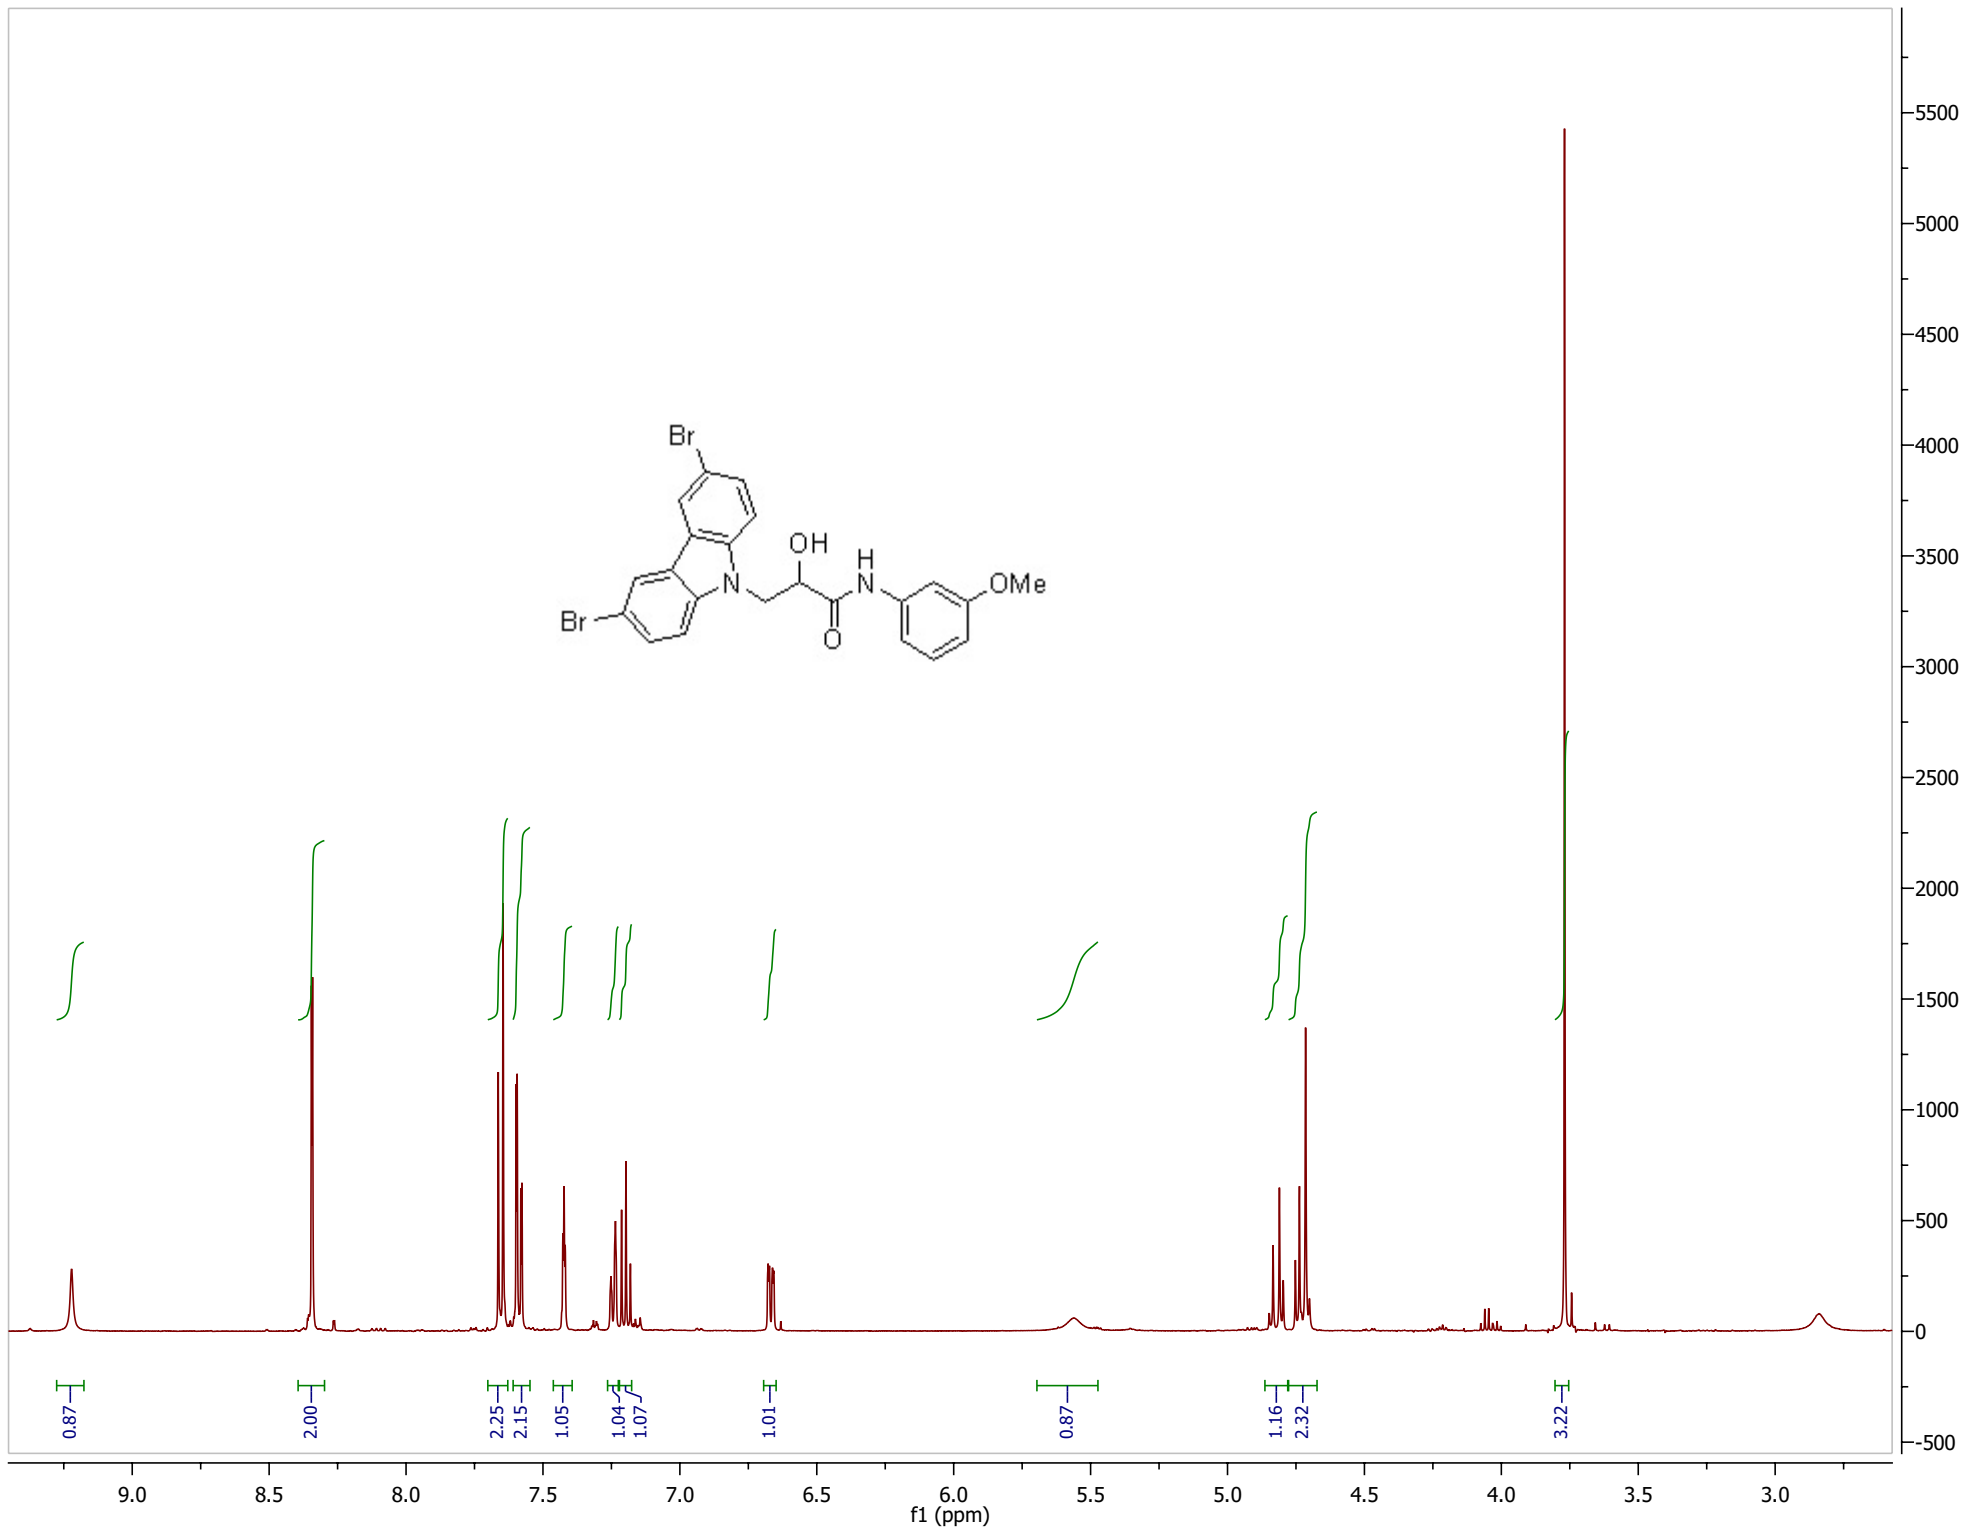

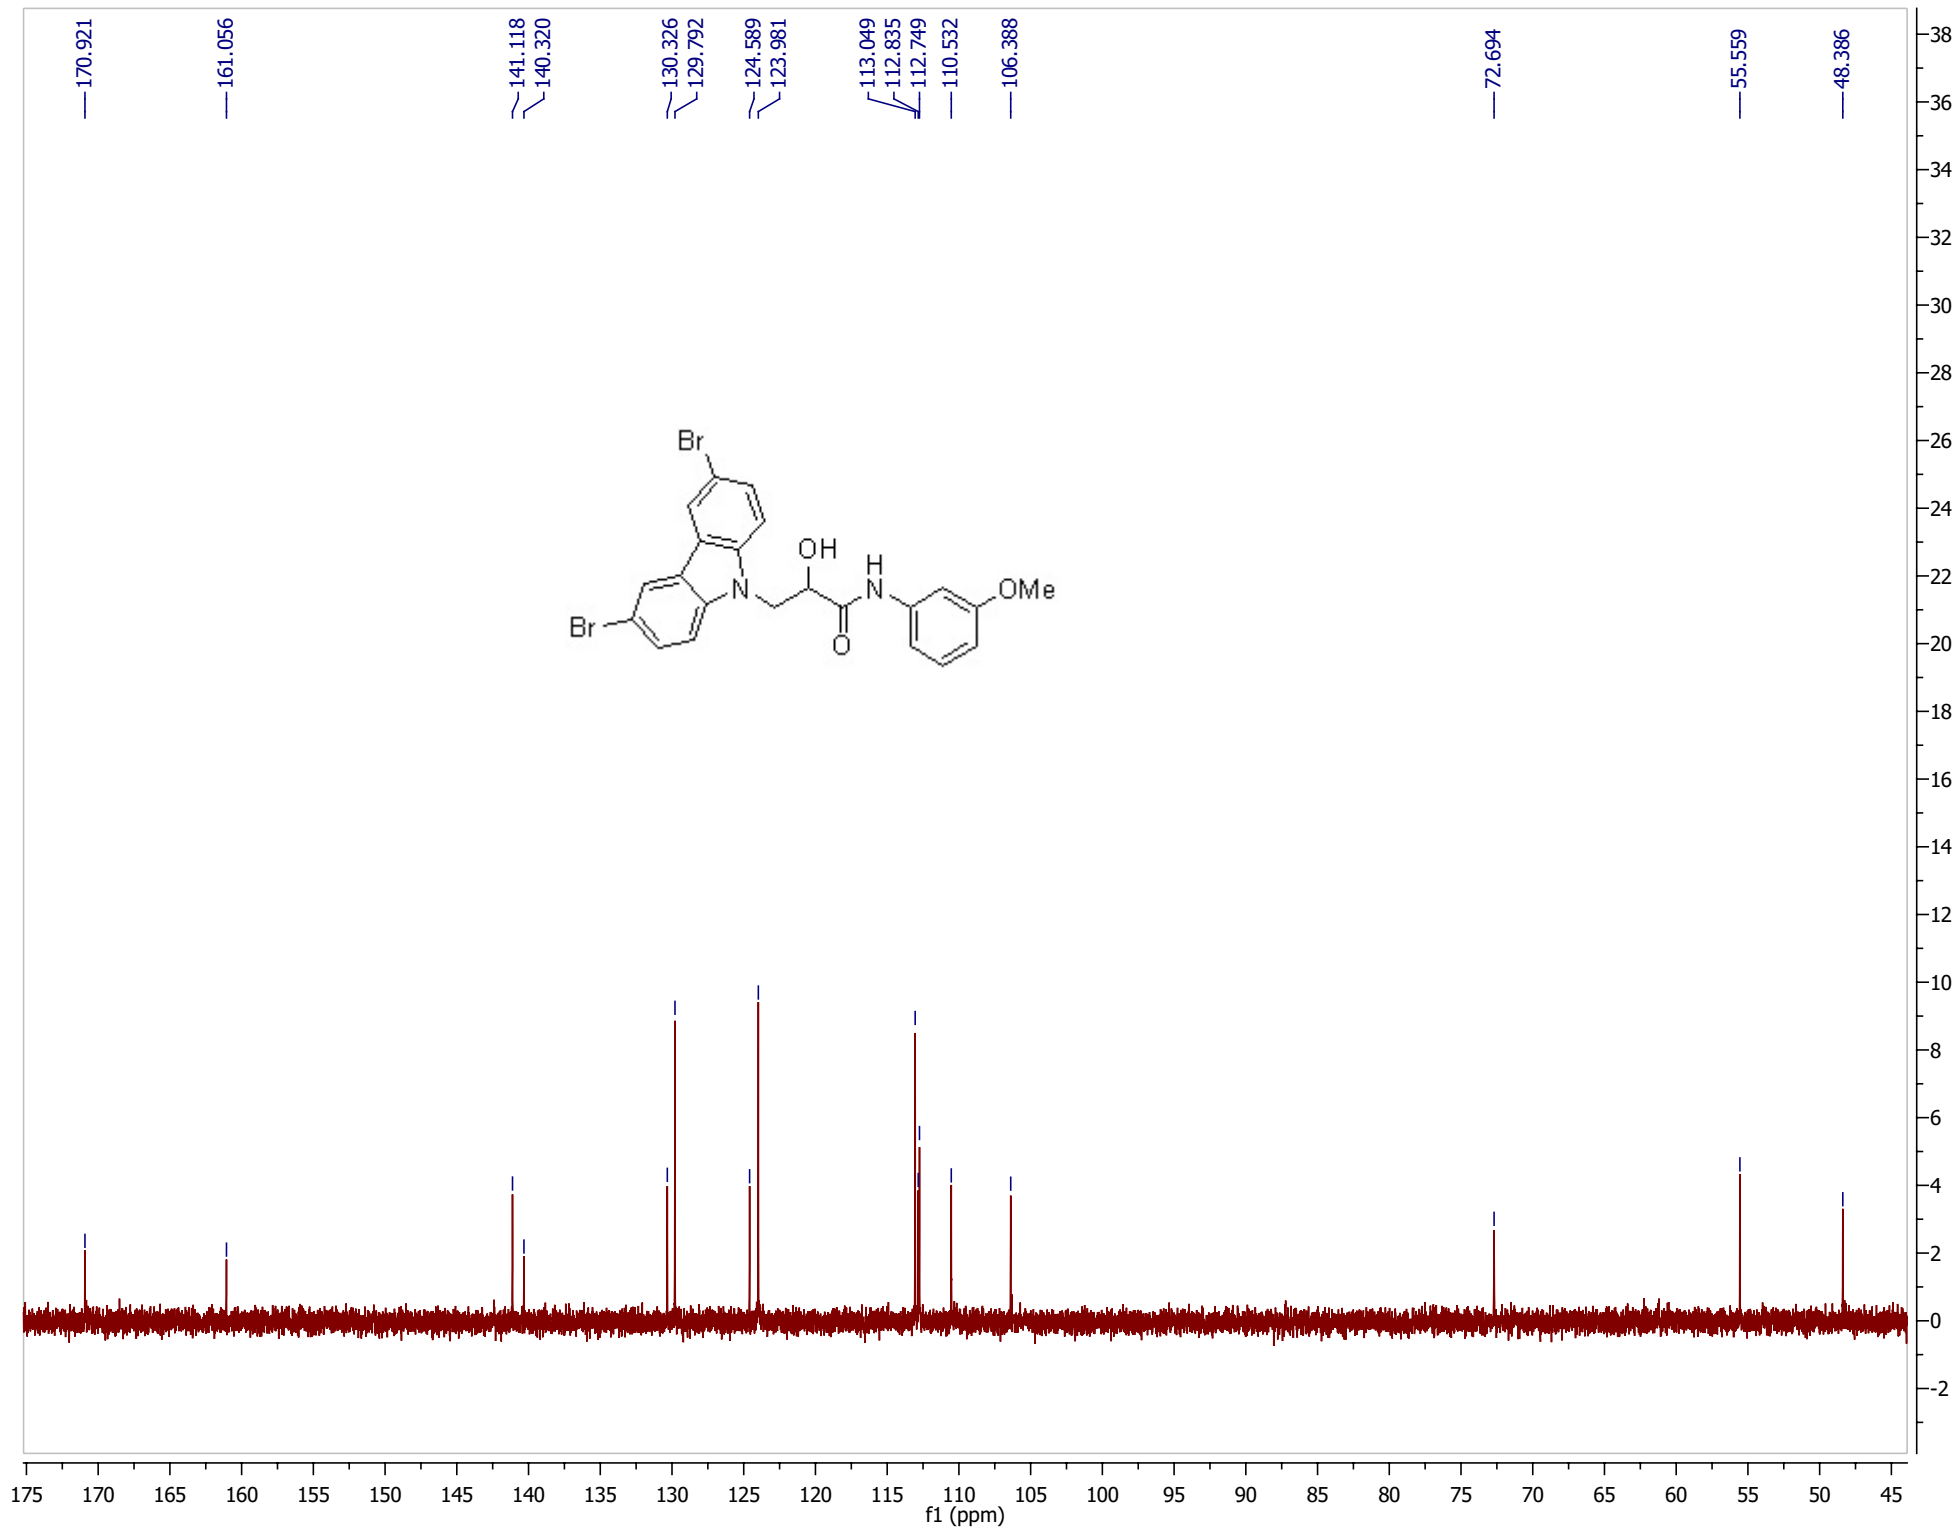



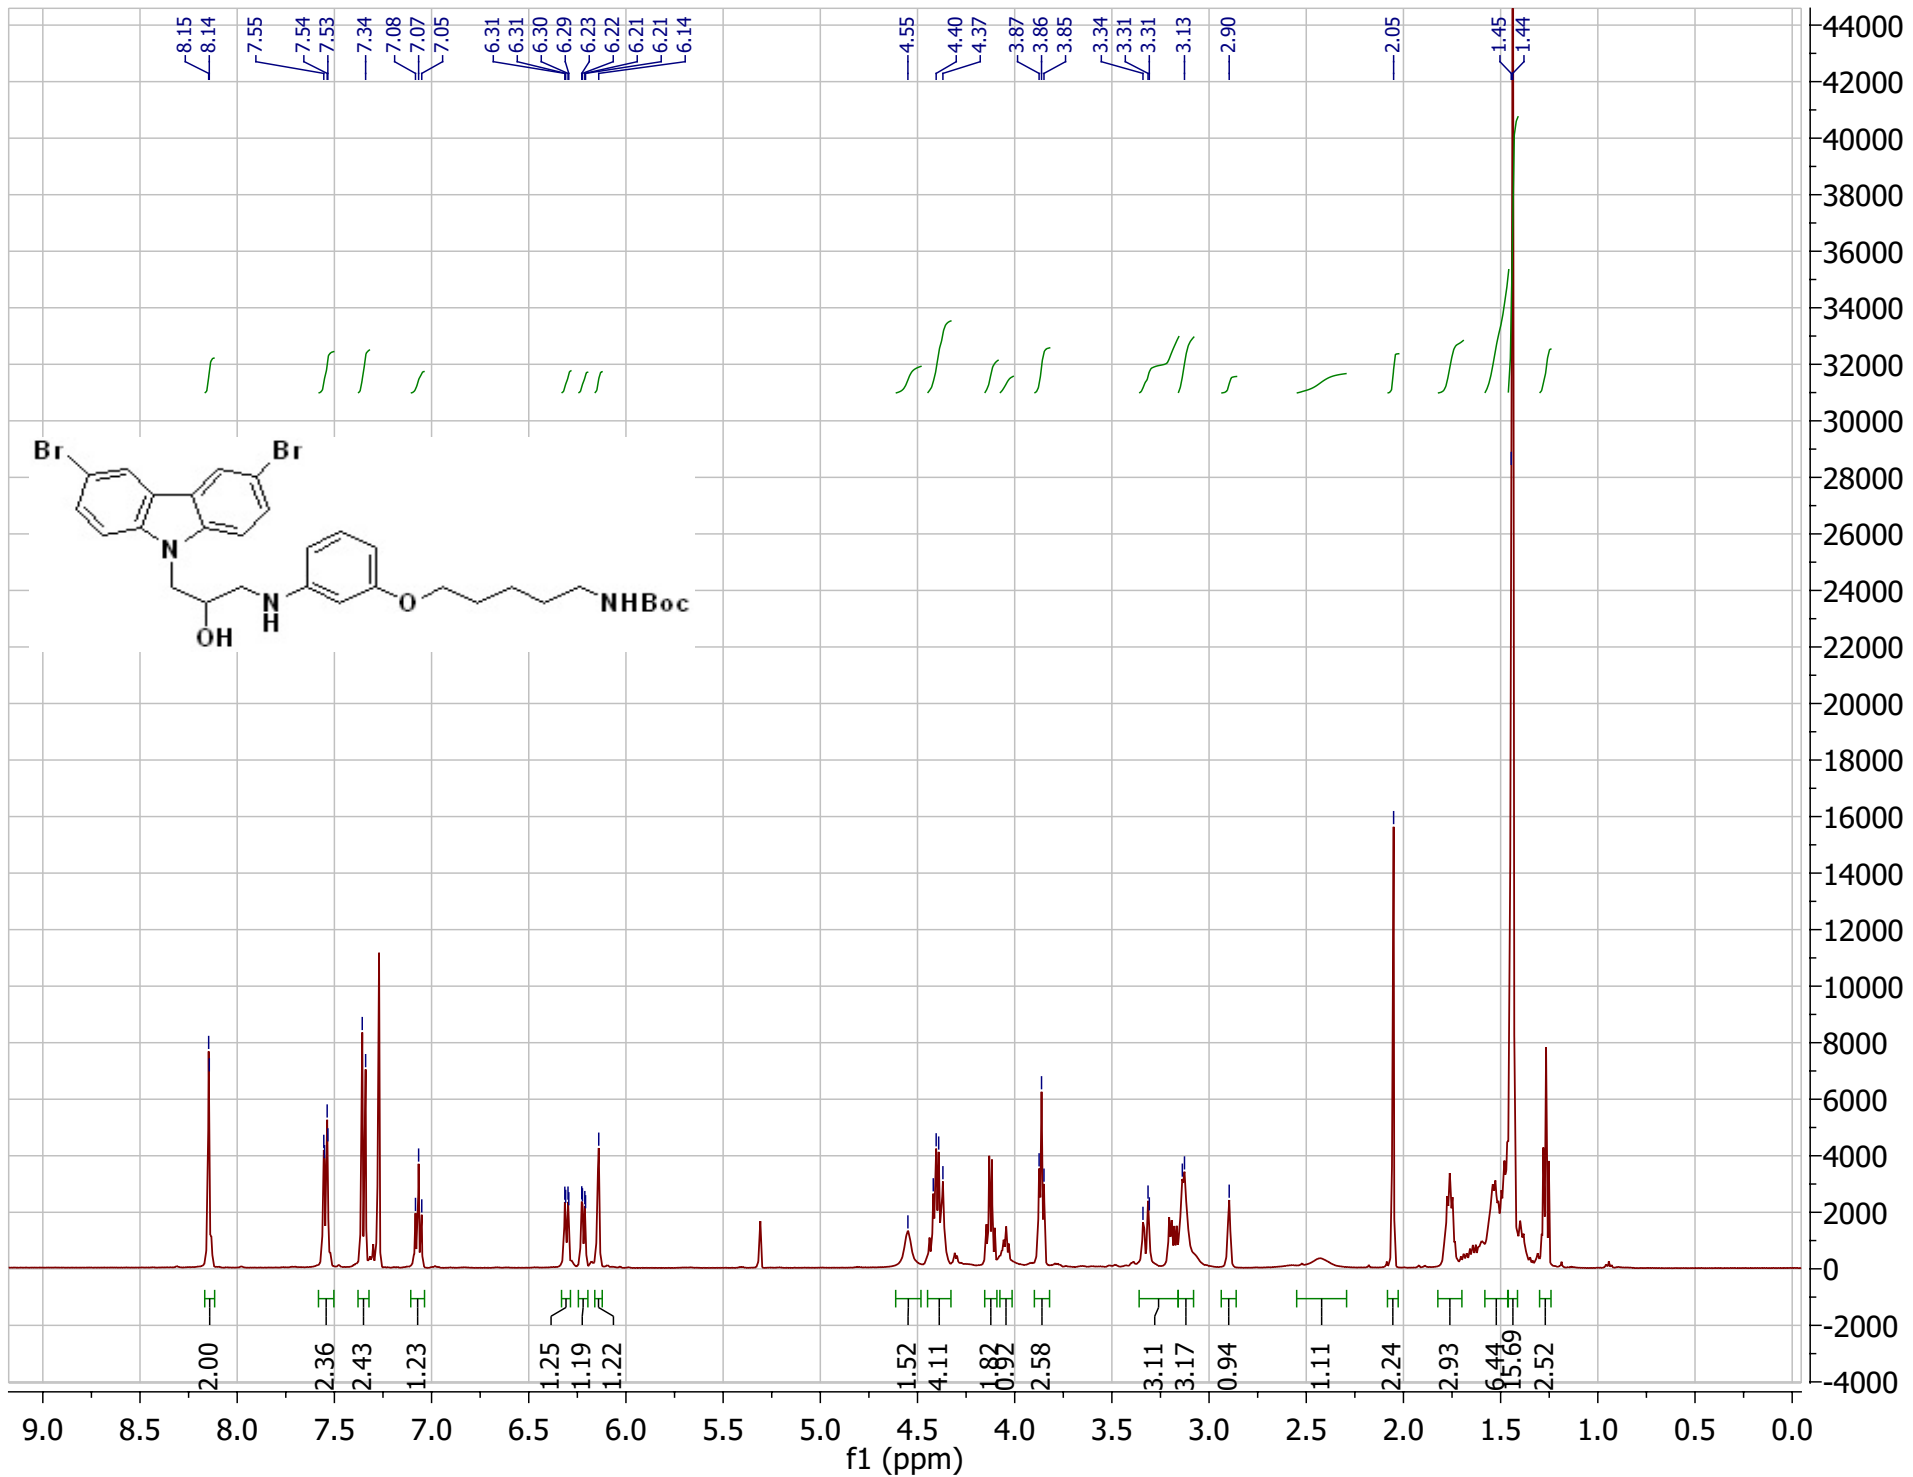

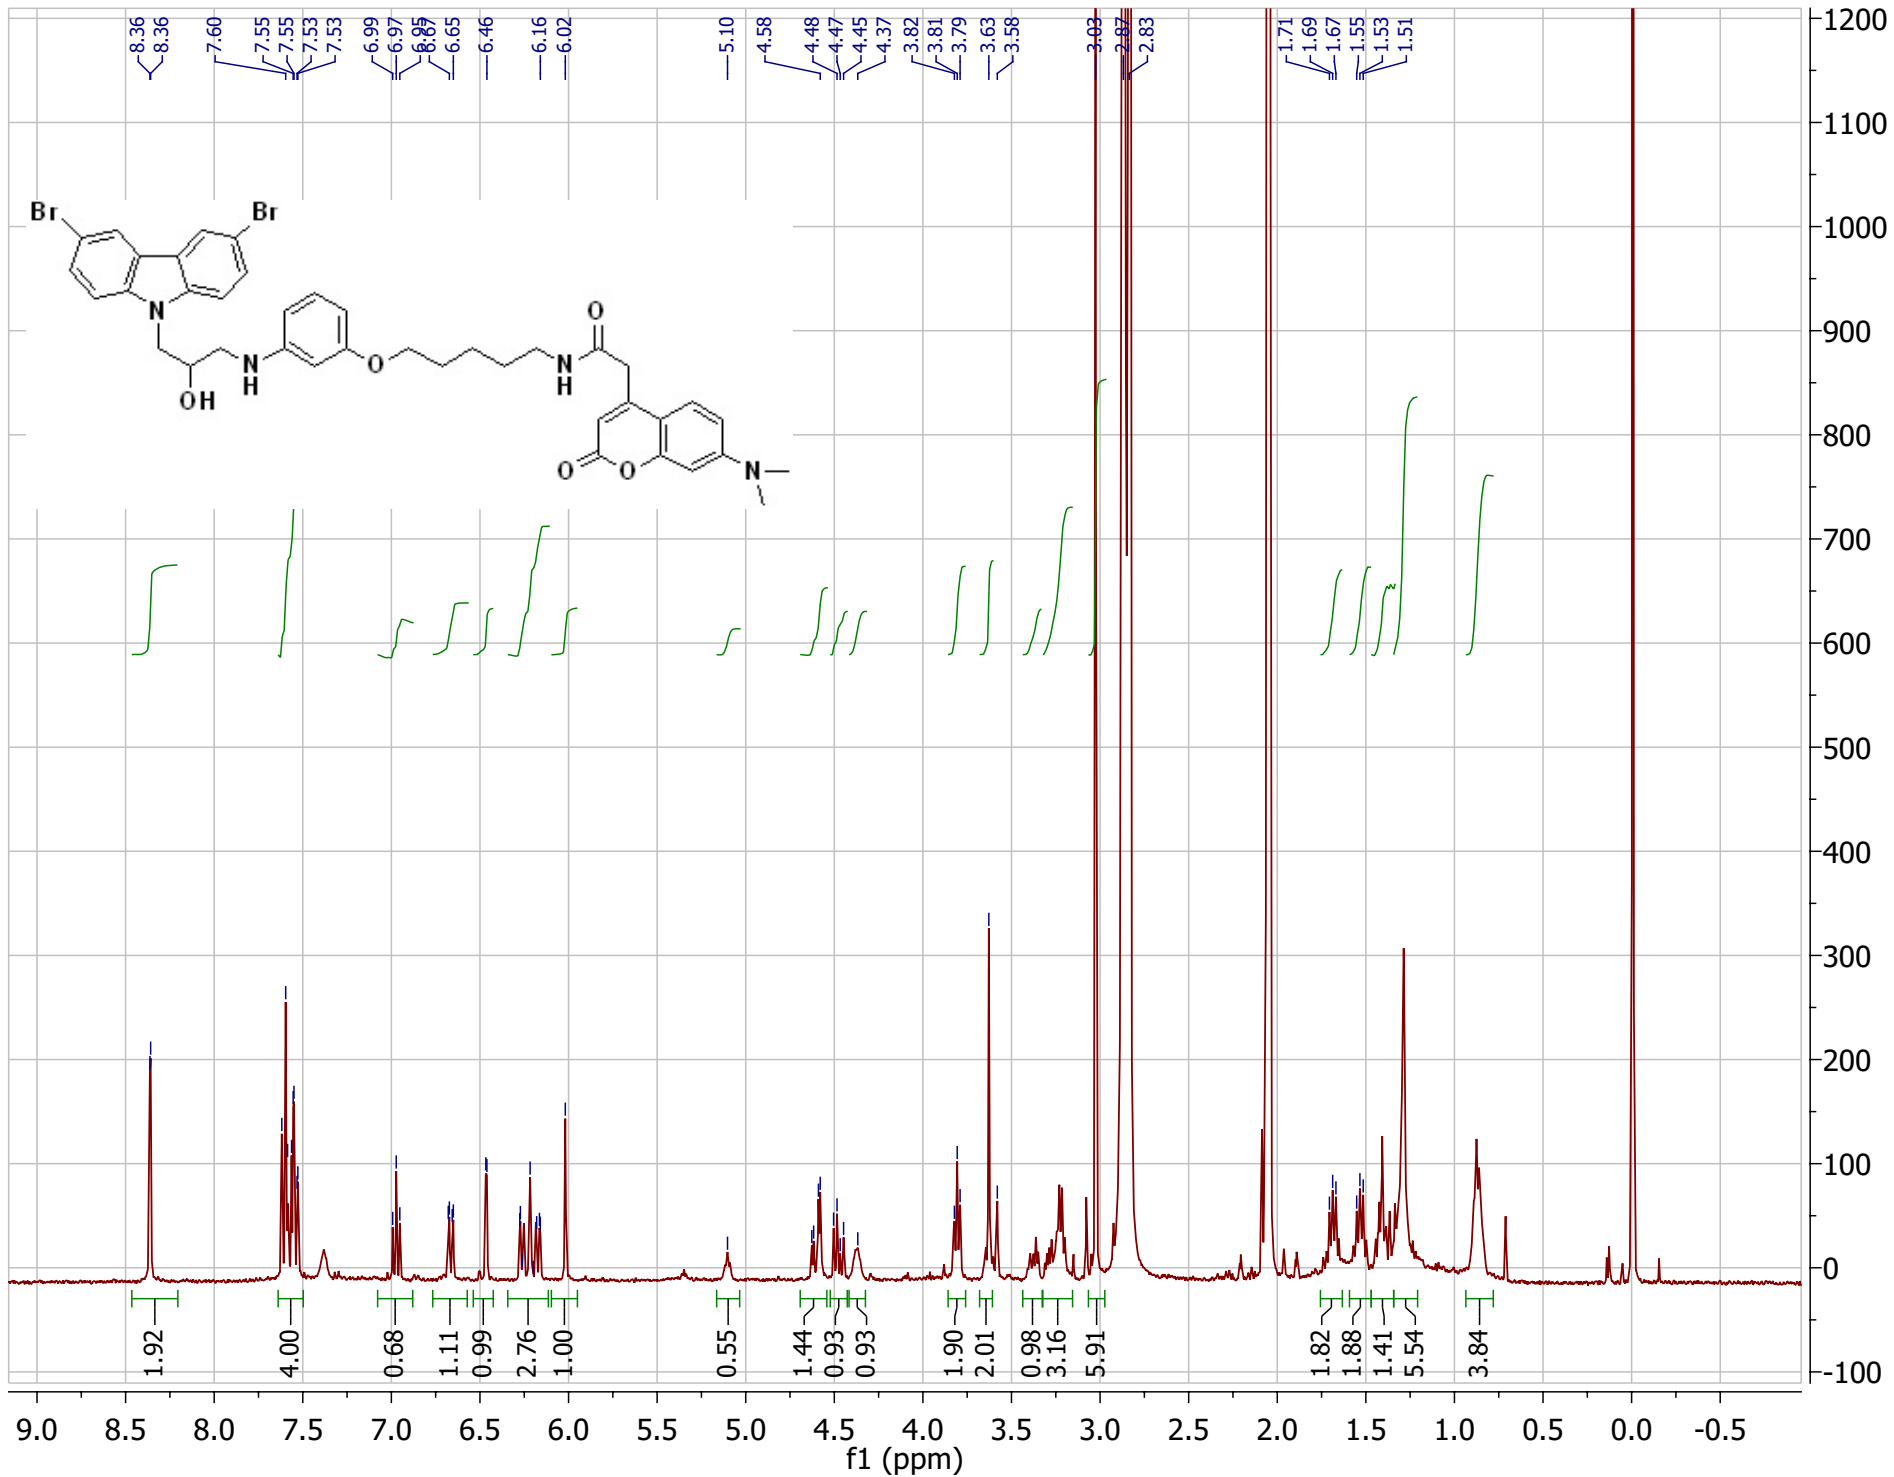

Supplement: NIHMS263032-supplement-2_si_002.pdf [file NIHMS263032-supplement-2_si_002.pdf]
